# Supplementary material for: Long-read RNA sequencing of archival tissues reveals novel genes and transcripts associated with clear cell renal cell carcinoma recurrence and immune evasion
Source: HighWire-hosted journal article supplement (doi:10.1101/gr.278801.123), 2024-09-16
Supplement: Supplemental_Tables.xlsx [file Supplemental_Tables.xlsx]

## Sheet: List of Tables
List of Supplemental Tables
Table S1: Clinical characteristics of ccRCC patients from sequenced cohort (n = 12) and validation cohort (n = 20)
Table S2: Sequencing output statistics
Table S3: PCR-cDNA-seq recurrent vs nonrecurrent ccRCC differential gene expression analysis (reference genome mapped)
Table S4: Direct RNA-seq recurrent vs norecurrent ccRCC differential gene expression analysis (reference genome mapped)
Table S5: Subsampled PCR-cDNA-seq (5%) recurrent vs non recurrent ccRCC differential gene expression analysis
Table S6: PCR-cDNA-seq recurrent vs nonrecurrent ccRCC differential gene expression analysis (reference transcriptome mapped)
Table S7: Direct RNA-seq recurrent vs nonrecurrent ccRCC differential gene expression analysis (reference transcriptome mapped)
Table S8: PCR-cDNA-seq recurrent vs non recurrent ccRCC differential transcript usage analysis
Table S9: Direct RNA-seq recurrent vs nonrecurrent ccRCC differential transcript usage analysis
Table S10: Gffcompare class codes and SQANTI3 categories equivalence
Table S11: SQANTI3 statistics on StringTie2 assembly
Table S12: Gffcompare statistics on StringTie2 and FLAIR assembly
Table S13: SQANTI3 and Gffcompare characterisation of StringTie2 transcripts
Table S14: RCC4 untreated vs IFNG+TNF treated Direct RNA-seq differential gene expression analysis
Table S15: Identification of ccRCC specific splice junctions
Table S16: PCR-cDNA-seq recurrent vs nonrecurrent ccRCC StringTie2 differential gene expression analysis
Table S17: Direct RNA-seq recurrent vs nonrecurrent ccRCC StringTie2 differential gene expression analysis
Table S18: RCC4 untreated vs IFNG+TNF treated Direct RNA-seq StringTie2 differential gene expression analysis
Table S19: List of novel genes and associated isoforms
Table S20: List of primers

## Sheet: TableS1
Table S1: Clinical characteristics of ccRCC patients from sequenced cohort (n = 12) and validation cohort (n = 20)
Sequenced cohort (n = 12)
Recurrent							Mutational status
Kidney No	Age	Sex	Leibovich Score	Grade	Stage	TNM staging	ATM	ATP9B	BAP1	COL11A1	DMD	KDM5C	PBRM1	PTK7	SETD2	TP53	TRRAP	VHL	Total no. of mutations	Time between operation and recurrence	Tumour reccurence location(s)
135	46-50	M	4	3	II	2	0	0	0	0	0	0	0	0	0	0	0	0	0	2years, 0months	Lung
171	61-65	M	5	3	III	3b	0	0	0	0	0	1	1	0	0	0	0	1	3	14years, 8months	Tongue, lung
243	56-60	M	5	3	III	3b	0	0	0	0	0	1	0	0	0	0	0	1	2	2years, 4months	Adrenal (contralateral)
254	51-55	F	5	3	III	3b	0	0	0	0	0	1	0	0	0	0	0	1	2	1years, 2months	Lymph node
260	61-65	M	5	3	III	3a	0	0	1	0	0	0	1	0	0	0	0	1	3	2years, 0months	Lung, lymph node
329	51-55	M	4	2	II	2b	0	0	0	0	0	0	0	0	0	0	0	1	1	4years, 1months	Lymph node
Nonreccurrent controls							Mutational status
Kidney No	Age	Sex	Leibovich Score	Grade	Stage	TNM staging	ATM	ATP9B	BAP1	COL11A1	DMD	KDM5C	PBRM1	PTK7	SETD2	TP53	TRRAP	VHL	Total no. of mutations	Time without recurrence (years)
273	51-55	M	5	3	III	3b	0	0	0	0	1	0	0	0	0	0	0	1	2	16
314	56-60	M	3	3	I	1b	0	0	0	1	0	0	1	0	1	0	0	1	4	15
318	61-65	F	5	3	III	3b	0	0	0	0	0	0	0	0	0	0	0	1	1	15
320	41-45	M	4	3	II	2a	0	0	0	0	0	0	0	0	0	0	0	1	1	15
382	71-75	M	3	3	I	1b	0	0	0	0	0	0	1	0	0	0	1	1	3	10
395	36-40	M	5	3	III	3a	0	0	0	0	0	0	0	0	0	0	0	1	1	12
Validation cohort (n = 20)
Recurrent
Kidney No	Age	Sex	Leibovich Score	Grade	Stage	TNM staging	Time between operation and recurrence	Tumour reccurence location(s)
118	41-45	M	4	2	III	3b	1years, 2months	Bone
142	66-70	M	1	3	I	1a	0years, 5months	Bone
155	61-65	F	2	2	I	1b	8years, 2months	Thyroid, bone
165	46-50	M	6	3	III	2	1years, 11months	Nodes, lung
177	66-70	F	5	3	III	3a	1years, 6months	Lung
224	46-50	M	2	3	I	1b	1years, 5months	Nodes
236	56-60	M	5	3	III	3a	1years, 2months	Local
263	51-55	M	6	3	III	3b	5years, 1months	Brain
319	66-70	M	5	L=3;R=3	L=III; R=I	L=3b;R=1b	1years, 0months	Lung
404	61-65	F	8	4	III	3a	1years, 11months	Local
Nonrecurrent controls
Kidney No	Age	Sex	Leibovich Score	Grade	Stage	TNM staging	Time without recurrence (years)
150	71-75	M	5	3	III	3a	18
230	56-60	M	6	3	III	3b	7
297	41-45	M	5	3	III	3a	15
298	66-70	M	5	3	III	3b	9
371	66-70	M	3	3	I	1b	10
377	56-60	F	8	4	III	3a	10
423	51-55	M	1	3	I	1a	11
432	66-70	M	3	3	I	1b	11
434	41-45	F	4	2	II	2a	11
445	51-55	F	2	2	I	1b	11

## Sheet: TableS2
Table S2: Sequencing ouput statistics
PCR-cDNAseq
No.	Tumour sample	RIN score	Sequencing kit	Flow Cell	Chemistry	Guppy	Total reads basedcalled (million)	Total pass reads (Q >7)	Median length of pass read (nt)	Mean length of passed read (nt)
1	135	7.4	SQK-PCS-111	PromethION FLO-PRO002	R9.4.1	5.1.12	84.09	72.3	453	606
2	171	8.5	SQK-PCS-111	PromethION FLO-PRO002	R9.4.1	5.1.12	50.18	43.94	774	959
3	243	7.2	SQK-PCS-111	PromethION FLO-PRO002	R9.4.1	5.1.12	67.28	59.47	552	688
4	254	7.6	SQK-PCS-111	PromethION FLO-PRO002	R9.4.1	5.1.12	83.04	71.69	442	574
5	260	8.2	SQK-PCS-111	PromethION FLO-PRO002	R9.4.1	5.1.12	70.77	60.67	633	730
6	273	8.5	SQK-PCS-111	PromethION FLO-PRO002	R9.4.1	5.1.12	60.99	53.73	746	881
7	314	8.3	SQK-PCS-111	PromethION FLO-PRO002	R9.4.1	5.1.12	59.7	51.01	719	845
8	318	8.6	SQK-PCS-111	PromethION FLO-PRO002	R9.4.1	5.1.12	53.44	47.64	794	965
9	320	7.4	SQK-PCS-111	PromethION FLO-PRO002	R9.4.1	5.1.12	84.7	72.77	410	563
10	329	8	SQK-PCS-111	PromethION FLO-PRO002	R9.4.1	5.1.12	60.44	53.57	741	880
11	382	8.1	SQK-PCS-111	PromethION FLO-PRO002	R9.4.1	5.1.12	73.27	51.3	589	685
12	395	8.5	SQK-PCS-111	PromethION FLO-PRO002	R9.4.1	5.1.12	72.95	63.18	681	778
Direct RNAseq
No.	Tumour sample	RIN score	Sequencing kit	Flow Cell	Chemistry	Guppy	Total reads basedcalled (million)	Total pass reads (Q >7)	Median length of pass read (nt)	Mean length of passed read (nt)
1	135	7.4	SQK-RNA002	PromethION FLO-PRO002	R9.4.1	5.1.12	4.44	3.34	382	482
2	171	8.5	SQK-RNA002	PromethION FLO-PRO002	R9.4.1	5.1.12	5.1	4	447	426
3	243	7.2	SQK-RNA002	PromethION FLO-PRO002	R9.4.1	5.1.12	6.01	4.69	466	554
4	254	7.6	SQK-RNA002	PromethION FLO-PRO002	R9.4.1	5.1.12	4.05	1.9	248	287
5	260	8.2	SQK-RNA002	PromethION FLO-PRO002	R9.4.1	5.1.12	4.71	3.01	305	342
6	273	8.5	SQK-RNA002	PromethION FLO-PRO002	R9.4.1	5.1.12	4.95	3.63	363	414
7	314	8.3	SQK-RNA002	PromethION FLO-PRO002	R9.4.1	5.1.12	3.46	2.34	339	391
8	318	8.6	SQK-RNA002	PromethION FLO-PRO002	R9.4.1	5.1.12	5.44	3.96	368	426
9	320	7.4	SQK-RNA002	PromethION FLO-PRO002	R9.4.1	5.1.12	2.41	1.48	315	371
10	329	8	SQK-RNA002	PromethION FLO-PRO002	R9.4.1	5.1.12	5.06	4.13	446	515
11	382	8.1	SQK-RNA002	PromethION FLO-PRO002	R9.4.1	5.1.12	3.62	2.69	379	444
12	395	8.5	SQK-RNA002	PromethION FLO-PRO002	R9.4.1	5.1.12	3.39	2.19	300	362

## Sheet: TableS3
Table S3: PCR-cDNA-seq recurrent vs nonrecurrent ccRCC differential gene expression analysis (reference genome mapped)
	Gene	Gene_name	baseMean	log2FoldChange	lfcSE	stat	pvalue	padj	R273	R314	R318	R320	R382	R395	R135	R171	R243	R254	R260	R329
1	ENSG00000229740		31.284	22.7129	3.00412	7.56058	4.01271e-14	5.73063e-10	0	0	0	0	0	0	0	324.723	0.891844	49.7929	0	0
2	ENSG00000248515		29.0367	22.6095	3.00419	7.52598	5.2325e-14	5.73063e-10	0	0	0	0	0	0	263.491	84.9486	0	0	0	0
3	ENSG00000276241		54.3457	-4.85182	0.685287	-7.07999	1.44165e-12	1.05259e-08	79.5799	65.8487	321.487	97.5407	28.2716	37.1571	0.899288	5.48055	1.78369	1.84418	5.93991	6.3162
4	ENSG00000172116	CD8B	916.589	-3.59896	0.695825	-5.17222	2.31325e-07	0.00101339	2317.89	785.307	5564.52	783.447	191.377	517.924	63.8494	121.942	47.2677	255.419	73.2588	276.86
5	ENSG00000234261		21.3404	-3.95353	0.760548	-5.19826	2.01162e-07	0.00101339	71.5212	10.9748	93.8568	28.8721	22.8348	12.1329	0	5.48055	1.78369	5.53254	0.989984	2.1054
6	ENSG00000188389	PDCD1	182.236	-3.37773	0.678863	-4.97556	6.5058e-07	0.00178129	784.719	51.2157	514.594	482.241	122.873	39.432	13.4893	20.5521	25.8635	71.0009	19.7997	41.0553
7	ENSG00000139193	CD27	47.9413	-3.09866	0.620493	-4.99387	5.91815e-07	0.00178129	144.05	25.6078	197.423	88.1768	32.6211	27.2991	4.49644	6.85069	14.2695	6.45463	5.93991	22.1067
8	ENSG00000277089	CCL3-AS1	64.2422	-3.5249	0.708171	-4.97747	6.44218e-07	0.00178129	59.4331	13.4136	454.181	60.0851	64.1548	58.3897	20.6836	5.48055	14.2695	6.45463	5.93991	8.4216
9	ENSG00000163508	EOMES	289.742	-2.80841	0.572074	-4.90917	9.14646e-07	0.00200344	638.654	92.676	940.726	913.762	329.473	127.396	60.2523	58.9159	94.5355	98.6636	20.7897	101.059
10	ENSG00000163606	CD200R1	111.91	-2.67705	0.543717	-4.92361	8.49617e-07	0.00200344	279.033	53.6545	395.925	230.196	115.261	87.2054	9.89217	28.7729	36.5656	46.1045	11.8798	48.4242
11	ENSG00000277632	CCL3	1295.38	-2.29905	0.473217	-4.85835	1.18369e-06	0.00227961	1058.72	3120.5	4785.62	1213.41	1351.6	1389.22	276.981	532.984	148.046	511.76	416.783	738.995
12	ENSG00000229782	SPNS2-AS1	46.6771	1.56515	0.322863	4.84772	1.24888e-06	0.00227961	39.2863	25.6078	21.5763	17.1672	23.9221	14.4079	62.0509	94.5395	57.9699	51.637	77.2188	74.7417
13	ENSG00000105374	NKG7	5533.95	-2.83672	0.587422	-4.8291	1.37149e-06	0.00231086	17016	3535.1	24878.5	6118.54	3523.08	3181.86	691.552	1211.2	721.502	2042.43	681.109	2806.5
14	ENSG00000147138	GPR174	140.252	-2.4459	0.513228	-4.76571	1.88185e-06	0.00274801	340.481	60.9711	454.181	316.032	168.542	81.8973	30.5758	34.2534	37.4575	67.3126	20.7897	70.5309
15	ENSG00000133477	FAM83F	73.6472	-5.19382	1.08909	-4.76895	1.85193e-06	0.00274801	1.00734	39.0215	113.275	5.46228	103.3	598.305	6.29502	0	2.67553	0	4.94992	9.4743
16	ENSG00000049249	TNFRSF9	229.825	-3.15336	0.665167	-4.7407	2.12978e-06	0.00288247	618.507	96.3343	922.386	458.832	207.688	175.169	14.3886	56.1757	46.3759	43.3382	3.95994	114.744
17	ENSG00000177494	ZBED2	37.6383	-3.42417	0.723814	-4.73073	2.23713e-06	0.00288247	201.468	15.8525	100.33	65.5474	18.4853	11.3746	6.29502	6.85069	2.67553	9.2209	1.97997	11.5797
18	ENSG00000225826	LINC00626	91.5297	3.28968	0.703105	4.67878	2.88583e-06	0.00318567	14.1028	18.2913	19.4187	28.8721	11.9611	9.0997	156.476	415.152	30.3227	63.6242	8.90986	322.126
19	ENSG00000153563	CD8A	1149.25	-3.07582	0.658203	-4.67306	2.96741e-06	0.00318567	3305.09	734.091	5492.24	1896.19	369.706	531.574	111.512	178.118	152.505	472.11	75.2388	472.662
20	ENSG00000128040	SPINK2	91.7196	5.09848	1.09242	4.66714	3.0542e-06	0.00318567	6.04405	1.21942	6.47288	0	13.0484	4.54985	17.9858	452.146	9.81028	577.228	7.91987	4.2108
21	ENSG00000113088	GZMK	2659.48	-2.9725	0.63601	-4.67366	2.95875e-06	0.00318567	9525.42	1307.22	11494.8	2522.01	2242.16	1215.57	169.066	545.315	358.521	777.322	323.725	1432.72
22	ENSG00000261801	LOXL1-AS1	81.8232	2.79734	0.602348	4.64405	3.41637e-06	0.00340147	24.1762	12.1942	11.867	2.34098	38.0579	34.8822	321.046	101.39	140.02	132.781	133.648	29.4756
23	ENSG00000197057	DTHD1	23.0386	-3.04334	0.658103	-4.62442	3.75651e-06	0.00342844	41.301	24.3884	77.6746	61.6457	18.4853	23.5075	3.59715	0	0.891844	13.8314	6.92989	4.2108
24	ENSG00000204252	HLA-DOA	1641.03	-1.86287	0.402328	-4.63024	3.65245e-06	0.00342844	2971.66	2094.97	4975.49	1542.7	1723.48	2137.67	231.117	730.284	1139.78	781.01	799.907	564.247
25	ENSG00000167608	TMC4	188.033	3.42414	0.742233	4.6133	3.96321e-06	0.00347241	45.3303	9.75537	48.5466	19.5081	17.3979	51.5649	1260.8	38.3639	116.832	89.4427	85.1387	473.715
26	ENSG00000277734	TRAC	1250.48	-2.24223	0.489051	-4.58486	4.5428e-06	0.00355377	2773.21	741.408	4783.46	1985.15	1421.19	683.236	239.211	376.788	414.707	649.151	260.366	677.939
27	ENSG00000275025		35.4356	2.08257	0.453952	4.58765	4.48264e-06	0.00355377	7.05139	8.53595	25.8915	8.58359	21.7474	9.858	33.2737	68.5069	90.9681	38.7278	75.2388	36.8445
28	ENSG00000100385	IL2RB	289.43	-1.76337	0.384545	-4.58559	4.527e-06	0.00355377	681.97	206.082	841.475	318.373	329.473	305.598	136.692	119.202	94.5355	161.366	92.0685	186.328
29	ENSG00000084674	APOB	2221.19	6.51113	1.43947	4.52327	6.08909e-06	0.00396597	103.756	51.2157	61.4924	0	19.5726	53.0816	357.017	9863.62	136.452	15787.1	217.797	3.1581
30	ENSG00000163600	ICOS	55.6091	-1.75308	0.387283	-4.52661	5.99366e-06	0.00396597	136.998	36.5826	125.142	92.8588	72.8537	50.0483	16.1872	26.0326	24.9716	32.2732	21.7797	31.581
31	ENSG00000254126	CD8B2	36.8851	-5.27035	1.15819	-4.55052	5.35143e-06	0.00396597	12.0881	10.9748	66.8865	248.924	0	92.5136	0	1.37014	0.891844	0	7.91987	1.0527
32	ENSG00000146678	IGFBP1	2896.28	8.08256	1.7926	4.50884	6.51822e-06	0.00396597	61.4478	42.6797	10.7881	0.780326	0	12.1329	18.885	21334.4	2.67553	13193.3	77.2188	1.0527
33	ENSG00000176919	C8G	317.4	3.81708	0.844398	4.52047	6.17023e-06	0.00396597	38.279	62.1905	47.4678	44.4786	38.0579	21.9909	42.2665	1881.2	1048.81	530.202	13.8598	40.0026
34	ENSG00000166796	LDHC	50.1115	3.99632	0.885272	4.51422	6.35488e-06	0.00396597	7.05139	0	2.15763	0.780326	16.3105	9.0997	16.1872	164.417	2.67553	175.197	131.668	75.7944
35	ENSG00000089692	LAG3	396.497	-2.93735	0.646301	-4.54487	5.49701e-06	0.00396597	1084.91	107.309	1098.23	1444.38	290.328	183.511	75.5402	35.6236	57.078	126.326	33.6595	221.067
36	ENSG00000225555		42.9097	2.71779	0.599588	4.53276	5.82187e-06	0.00396597	18.1321	14.6331	8.63051	1.56065	13.0484	12.1329	53.9573	197.3	52.6188	76.5335	15.8397	50.5296
37	ENSG00000234663	LINC01934	71.3207	-2.94489	0.657454	-4.47924	7.49093e-06	0.00440409	222.622	29.2661	289.122	134.216	45.6695	36.3988	4.49644	13.7014	7.13475	20.286	11.8798	41.0553
38	ENSG00000172543	CTSW	1073.38	-2.61442	0.584226	-4.47502	7.64041e-06	0.00440409	3009.93	985.292	4675.58	1375.71	732.887	292.707	202.34	383.639	208.692	248.964	140.578	624.251
39	ENSG00000117560	FASLG	146.032	-2.94791	0.660411	-4.46376	8.05352e-06	0.00452319	328.393	74.3847	685.047	237.219	143.533	82.6556	13.4893	21.9222	31.2145	20.286	7.91987	106.323
40	ENSG00000254364		14.2189	4.72606	1.06211	4.44969	8.59937e-06	0.00459416	1.00734	1.21942	3.23644	0	1.08737	0	27.8779	10.9611	48.1596	2.76627	73.2588	1.0527
41	ENSG00000077984	CST7	2250.64	-2.86267	0.642794	-4.45348	8.44879e-06	0.00459416	7170.25	1013.34	10713.7	2360.49	1554.94	930.444	176.26	497.36	262.202	682.347	384.114	1262.19
42	ENSG00000163739	CXCL1	789.407	4.58085	1.04435	4.38633	1.15281e-05	0.00601216	6.04405	31.7049	56.0983	52.2818	135.921	97.8217	33.2737	3339.03	1697.18	3944.7	1.97997	76.8471
43	ENSG00000286039		57.2097	4.25666	0.9722	4.37838	1.19564e-05	0.00609054	7.05139	4.87768	7.5517	10.1442	2.17474	2.27492	339.931	149.345	4.45922	135.547	0	23.1594
44	ENSG00000102897	LYRM1	1715.08	1.1783	0.269673	4.36937	1.24606e-05	0.00620309	1290.4	1315.76	755.17	1228.23	843.799	873.571	2661.89	3292.44	1669.53	2893.52	2134.41	1622.21
45	ENSG00000027869	SH2D2A	196.605	-1.94644	0.446415	-4.36015	1.29975e-05	0.00632658	416.032	125.6	604.136	403.429	191.377	132.704	53.058	64.3965	48.1596	118.95	94.0485	107.375
46	ENSG00000184613	NELL2	74.3617	-2.75653	0.638591	-4.31659	1.58459e-05	0.0075454	225.644	59.7516	283.728	117.829	58.7179	31.8489	12.59	5.48055	5.35106	32.2732	13.8598	45.2661
47	ENSG00000211772	TRBC2	1776.98	-2.14429	0.498541	-4.30113	1.69929e-05	0.00775444	3252.7	910.908	6181.6	3572.33	2294.35	1178.41	323.744	393.23	523.512	1282.63	436.583	973.748
48	ENSG00000198846	TOX	208.115	-2.60273	0.60509	-4.30139	1.69729e-05	0.00775444	585.265	75.6041	762.722	444.005	175.066	101.613	26.9786	63.0263	80.266	78.3777	12.8698	91.5849
49	ENSG00000135604	STX11	187.315	-1.58483	0.369442	-4.28979	1.78839e-05	0.00799446	393.87	165.841	517.831	207.567	249.008	151.662	71.943	87.6888	93.6436	70.0789	88.1086	150.536
50	ENSG00000278030	TRBV7-9	64.1996	-3.50226	0.817866	-4.2822	1.85055e-05	0.0081069	149.086	24.3884	363.56	29.6524	116.349	24.2659	0	26.0326	8.0266	9.2209	2.96995	16.8432
51	ENSG00000154027	AK5	22.9118	4.07345	0.961763	4.2354	2.28146e-05	0.00889061	6.04405	1.21942	1.07881	0	3.26211	3.79154	4.49644	57.5458	6.24291	27.6627	159.387	4.2108
52	ENSG00000232453	LINC02777	300.016	3.54505	0.835921	4.24089	2.22631e-05	0.00889061	28.2055	59.7516	65.8077	56.9638	52.1937	21.2326	707.74	2353.9	49.9433	81.1439	47.5192	75.7944
53	ENSG00000145284	SCD5	154.367	2.0719	0.489596	4.23186	2.31768e-05	0.00889061	41.301	70.7264	60.4136	65.5474	67.4169	50.8066	91.7274	39.734	312.145	224.99	395.994	431.607
54	ENSG00000105996	HOXA2	29.8085	-2.76237	0.653538	-4.2268	2.37035e-05	0.00889061	11.0808	15.8525	17.261	65.5474	95.6885	106.163	15.2879	9.59097	7.13475	2.76627	3.95994	7.3689
55	ENSG00000013588	GPRC5A	136.889	4.19159	0.990717	4.23086	2.32795e-05	0.00889061	19.1395	13.4136	19.4187	0	4.34948	28.8157	119.605	1131.73	19.6206	213.003	68.3089	5.2635
56	ENSG00000015413	DPEP1	848.906	-5.10382	1.20315	-4.24205	2.2149e-05	0.00889061	12.0881	4645.99	17.261	155.285	2772.79	2295.4	50.3601	109.611	14.2695	101.43	3.95994	8.4216
57	ENSG00000271503	CCL5	5361.36	-2.57621	0.606431	-4.24816	2.15535e-05	0.00889061	12293.6	3022.94	28763.3	5296.07	2861.96	2859.58	525.184	1449.61	1275.34	2023.99	1059.28	2905.45
58	ENSG00000185433	LINC00158	43.1539	-2.82415	0.668518	-4.2245	2.39475e-05	0.00889061	143.042	35.3632	121.906	81.9342	39.1453	32.6072	10.7915	1.37014	1.78369	17.5197	3.95994	28.4229
59	ENSG00000182240	BACE2	796.732	2.10519	0.495458	4.24898	2.14746e-05	0.00889061	380.775	214.618	292.359	86.6162	239.221	589.205	2526.1	1155.03	967.651	2023.99	516.772	568.458
60	ENSG00000186810	CXCR3	268.939	-2.45519	0.585461	-4.19361	2.74556e-05	0.010007	786.733	184.133	1045.37	338.661	263.143	111.471	26.9786	69.877	65.1046	132.781	35.6394	167.379
61	ENSG00000183395	PMCH	44.1593	-2.72128	0.649437	-4.19022	2.78682e-05	0.010007	65.4772	42.6797	165.059	88.1768	53.2811	44.7402	0	21.9222	6.24291	11.0651	4.94992	26.3175
62	ENSG00000229754	CXCR2P1	155.879	-3.91417	0.938506	-4.17063	3.03753e-05	0.0105124	742.41	14.6331	582.56	246.583	81.5527	86.4471	28.7772	5.48055	4.45922	0.92209	1.97997	74.7417
63	ENSG00000246523	FZD4-DT	121.609	1.64888	0.395267	4.17155	3.02533e-05	0.0105124	57.4184	97.5537	49.6255	33.554	70.679	44.7402	262.592	298.69	158.748	66.3905	177.207	142.115
64	ENSG00000180644	PRF1	332.708	-2.08768	0.500871	-4.1681	3.07156e-05	0.0105124	779.682	249.981	1345.28	380.019	279.454	197.918	58.4537	87.6888	107.913	187.184	133.648	185.275
65	ENSG00000173626	TRAPPC3L	19.1314	-2.82319	0.680054	-4.15141	3.3043e-05	0.011135	75.5506	15.8525	42.0738	22.6295	28.2716	16.6828	0	4.11041	0.891844	10.143	4.94992	8.4216
66	ENSG00000199377	RNU5F-1	131.177	-2.06253	0.499365	-4.13031	3.62272e-05	0.012023	180.314	307.294	483.309	137.337	116.349	45.4985	33.2737	56.1757	30.3227	76.5335	44.5493	63.162
67	ENSG00000261008	LINC01572	18.3131	-1.8915	0.458701	-4.12361	3.72983e-05	0.0121938	32.2349	17.0719	26.9704	29.6524	30.4463	37.1571	2.69786	2.74028	15.1613	9.2209	6.92989	9.4743
68	ENSG00000109255	NMU	165.148	5.38325	1.3076	4.11688	3.84033e-05	0.0123704	16.1175	2.43884	6.47288	2.34098	2.17474	16.6828	201.441	1233.12	0	475.799	17.8197	7.3689
69	ENSG00000107593	PKD2L1	52.3769	-2.33702	0.570739	-4.09473	4.2267e-05	0.0130888	54.3964	53.6545	187.714	31.9934	144.62	53.0816	34.1729	2.74028	23.1879	8.29881	17.8197	16.8432
70	ENSG00000135480	KRT7	412.375	2.81811	0.688034	4.09588	4.20563e-05	0.0130888	63.4625	107.309	213.605	36.6753	150.057	43.9819	688.855	796.05	2171.64	39.6499	277.196	360.023
71	ENSG00000183570	PCBP3	63.9824	6.30741	1.5407	4.09385	4.24261e-05	0.0130888	4.02936	2.43884	0	2.34098	0	0.758308	28.7772	305.541	0	416.785	3.95994	3.1581
72	ENSG00000225079	FTH1P22	25.0064	-3.05074	0.747258	-4.08258	4.4538e-05	0.0135495	103.756	7.31653	90.6204	21.8491	19.5726	24.2659	5.39573	10.9611	0	9.2209	3.95994	3.1581
73	ENSG00000148600	CDHR1	1019.71	-4.92658	1.20916	-4.0744	4.61339e-05	0.0138427	3533.75	697.509	255.679	390.943	26.0969	6943.07	254.499	83.5784	6.24291	35.0394	5.93991	4.2108
74	ENSG00000181847	TIGIT	240.675	-2.21528	0.544668	-4.06722	4.7578e-05	0.0138953	438.193	184.133	1073.42	236.439	251.182	192.61	46.763	106.871	35.6738	104.196	38.6094	180.012
75	ENSG00000137078	SIT1	373.629	-2.41825	0.594488	-4.06778	4.74628e-05	0.0138953	858.255	208.521	1721.79	571.979	268.58	147.87	46.763	91.7992	126.642	160.444	52.4692	228.436
76	ENSG00000185668	POU3F1	13.4231	-3.5502	0.875518	-4.05497	5.01407e-05	0.0142634	65.4772	2.43884	39.9161	25.7508	11.9611	3.03323	1.79858	1.37014	4.45922	2.76627	0	2.1054
77	ENSG00000197182	MIRLET7BHG	73.5137	1.9482	0.480367	4.05565	4.99961e-05	0.0142634	22.1615	19.5107	23.7339	28.8721	32.6211	53.8399	134.893	234.294	160.532	88.5207	49.4992	33.6864
78	ENSG00000286084		21.8287	-2.63961	0.654987	-4.03002	5.57726e-05	0.0148637	53.3891	19.5107	87.3839	35.895	8.69895	20.4743	2.69786	9.59097	1.78369	11.0651	1.97997	9.4743
79	ENSG00000271005	CTHRC1P1	6.34087	-5.09296	1.26414	-4.0288	5.60615e-05	0.0148637	25.1835	4.87768	30.2068	7.02293	0	6.82477	0	0	0	0.92209	0	1.0527
80	ENSG00000167286	CD3D	2876.16	-2.46412	0.611196	-4.03164	5.53893e-05	0.0148637	9188.96	1629.15	12289.9	2361.27	2416.13	1333.11	267.988	952.246	489.622	1301.07	512.812	1771.69
81	ENSG00000152207	CYSLTR2	132.88	-3.13419	0.778156	-4.02771	5.63225e-05	0.0148637	83.6093	29.2661	637.579	613.336	41.32	26.5408	15.2879	9.59097	16.945	44.2603	33.6595	43.1607
82	ENSG00000137825	ITPKA	100.448	3.81314	0.94526	4.03395	5.48463e-05	0.0148637	5.0367	4.87768	29.128	7.02293	1.08737	32.6072	409.176	516.542	12.4858	163.21	16.8297	7.3689
83	ENSG00000275302	CCL4	1867.1	-2.05115	0.509231	-4.02793	5.6271e-05	0.0148637	3924.6	2525.42	7474.02	1602.01	1439.68	1083.62	316.549	1134.47	348.711	769.945	651.41	1134.81
84	ENSG00000145649	GZMA	908.345	-2.00137	0.497973	-4.01903	5.84381e-05	0.0150888	2099.3	545.081	2989.39	1423.31	1241.78	423.136	207.736	275.398	300.551	696.178	194.037	504.243
85	ENSG00000160654	CD3G	397.689	-2.15557	0.536403	-4.01857	5.85531e-05	0.0150888	1155.42	267.053	1506.02	427.619	287.065	254.033	55.7559	175.378	94.5355	209.314	98.9984	241.068
86	ENSG00000006740	ARHGAP44	316.869	3.29941	0.821936	4.0142	5.96487e-05	0.0151924	38.279	18.2913	48.5466	79.5932	76.1158	89.4803	1889.4	590.529	12.4858	816.05	92.0685	51.5823
87	ENSG00000235304	LINC01281	11.9824	-4.28354	1.06902	-4.00699	6.14983e-05	0.0154834	34.2496	2.43884	76.5958	5.46228	4.34948	13.6495	0	1.37014	3.56738	0	0	2.1054
88	ENSG00000156395	SORCS3	311.617	5.99576	1.50028	3.99643	6.43052e-05	0.0158664	8.05873	0	0	0	0	49.29	1518	282.248	279.147	1060.4	396.984	145.273
89	ENSG00000266088		124.033	-2.57649	0.644796	-3.99583	6.44682e-05	0.0158664	596.346	56.0934	370.033	103.003	91.339	57.6314	5.39573	49.325	36.5656	47.9487	33.6595	41.0553
90	ENSG00000254427	LINC02696	78.2409	3.03437	0.760665	3.98909	6.6326e-05	0.0161423	0	13.4136	15.1034	14.0459	9.78632	49.29	401.082	45.2146	149.83	37.8057	47.5192	155.8
91	ENSG00000247699	FABP6-AS1	36.7713	3.25448	0.816456	3.98611	6.71662e-05	0.0161671	17.1248	0	3.23644	7.02293	9.78632	4.54985	183.455	121.942	45.484	10.143	6.92989	31.581
92	ENSG00000233223		460.978	1.29933	0.32648	3.97982	6.89688e-05	0.0164206	312.276	347.535	202.817	190.4	275.104	270.716	706.84	743.985	944.463	848.323	386.094	303.178
93	ENSG00000116299	ELAPOR1	51.1231	-2.45909	0.62364	-3.94313	8.04257e-05	0.0185394	196.431	12.1942	169.374	72.5703	39.1453	29.574	9.89217	9.59097	18.7287	24.8964	7.91987	23.1594
94	ENSG00000162390	ACOT11	183.055	1.85678	0.471139	3.94104	8.11287e-05	0.0185394	25.1835	62.1905	71.2017	114.708	108.737	92.5136	106.116	585.049	234.555	170.587	440.543	185.275
95	ENSG00000115009	CCL20	2816.2	3.81921	0.969179	3.94067	8.12538e-05	0.0185394	28.2055	1223.08	215.763	110.026	441.472	217.634	16.1872	20543.8	5369.79	1293.69	3229.33	1105.34
96	ENSG00000287347		7.54763	-5.34706	1.35485	-3.9466	7.92674e-05	0.0185394	32.2349	1.21942	45.3102	1.56065	4.34948	3.79154	0	0	0	0	0	2.1054
97	ENSG00000164112	SMIM43	54.291	-3.34837	0.852456	-3.92791	8.56861e-05	0.0193492	215.571	35.3632	176.926	110.806	36.9706	17.4411	4.49644	5.48055	0	6.45463	1.97997	40.0026
98	ENSG00000105427	CNFN	866.763	2.41896	0.616321	3.92483	8.67909e-05	0.0193986	375.738	145.111	155.349	275.455	215.299	470.909	2570.17	3904.89	1100.54	483.175	510.832	193.697
99	ENSG00000163884	KLF15	258.223	2.1314	0.543595	3.92094	8.82045e-05	0.0195047	109.8	53.6545	11.867	142.8	128.31	128.912	622.307	231.553	768.77	441.681	331.645	127.377
100	ENSG00000161405	IKZF3	257.417	-1.606	0.409835	-3.91865	8.90465e-05	0.0195047	546.986	173.158	664.55	479.12	278.367	183.511	113.31	75.3576	134.668	201.016	83.1587	155.8
101	ENSG00000130173	ANGPTL8	253.073	6.86634	1.75461	3.91331	9.10407e-05	0.0197441	0	3.65826	10.7881	1.56065	7.61158	2.27492	1598.03	1270.12	2.67553	140.158	0	0
102	ENSG00000265185	SNORD3B-1	10.3964	-3.50681	0.898418	-3.90332	9.4882e-05	0.0203754	31.2276	29.2661	24.8127	3.90163	21.7474	3.79154	0	0	0	2.76627	1.97997	5.2635
103	ENSG00000136425	CIB2	72.1321	1.62586	0.417297	3.89616	9.77294e-05	0.0207831	21.1542	48.7768	33.4432	52.2818	33.7084	22.7492	177.16	101.39	81.1578	167.82	89.0986	36.8445
104	ENSG00000004468	CD38	231.868	-2.27869	0.586233	-3.887	0.000101489	0.0211599	915.673	47.5574	688.283	232.537	241.396	181.236	72.8423	93.1694	45.484	61.78	44.5493	157.905
105	ENSG00000138670	RASGEF1B	215.512	-0.871587	0.224488	-3.88255	0.000103365	0.0211599	239.747	284.125	343.063	251.265	301.201	252.517	144.785	171.267	93.6436	177.041	181.167	146.325
106	ENSG00000151062	CACNA2D4	765.937	3.22979	0.831831	3.88275	0.000103284	0.0211599	187.365	235.348	118.67	61.6457	212.037	70.5226	427.162	6450.61	103.454	942.376	100.978	281.071
107	ENSG00000152192	POU4F1	3.43472	-5.20228	1.33903	-3.88512	0.000102281	0.0211599	3.02202	2.43884	5.39407	1.56065	25.0095	3.79154	0	0	0	0	0	0
108	ENSG00000154451	GBP5	532.149	-2.25855	0.582111	-3.87993	0.000104486	0.0211692	1921	201.204	1473.66	916.103	506.714	263.133	61.1516	157.566	145.371	231.445	99.9884	408.448
109	ENSG00000163519	TRAT1	121.41	-2.21535	0.571269	-3.87794	0.000105343	0.0211692	288.1	57.3128	526.461	133.436	140.271	53.0816	11.6907	49.325	47.2677	55.3254	34.6495	60.0039
110	ENSG00000198851	CD3E	1372.5	-2.22471	0.574632	-3.87154	0.00010815	0.0215355	4183.49	877.983	5747.92	1052.66	1018.87	686.269	154.678	593.27	352.278	680.503	366.294	755.839
111	ENSG00000248243	LINC02014	4.73065	4.71782	1.21948	3.86871	0.000109415	0.0215912	2.01468	0	0	0	0	0	28.7772	2.74028	2.67553	7.37672	7.91987	5.2635
112	ENSG00000177822	TENM3-AS1	46.0765	3.79435	0.986004	3.84821	0.000118984	0.0230639	0	3.65826	0	7.02293	0	25.7825	8.09359	187.709	69.5638	30.429	122.758	97.9011
113	ENSG00000250770		21.8477	4.42731	1.15016	3.84931	0.000118452	0.0230639	1.00734	0	0	0	1.08737	9.0997	147.483	6.85069	0.891844	9.2209	46.5293	40.0026
114	ENSG00000224167	LINC01357	124.289	-2.29649	0.598002	-3.84027	0.0001229	0.0233807	584.258	70.7264	196.344	188.059	108.737	90.2387	6.29502	90.4291	30.3227	39.6499	48.5092	37.8972
115	ENSG00000135362	PRR5L	272.544	-1.66605	0.434044	-3.83844	0.00012382	0.0233807	584.258	221.935	717.411	461.953	318.599	182.752	95.3245	123.312	62.4291	254.497	89.0986	158.958
116	ENSG00000101425	BPI	24.0515	3.72554	0.969782	3.84163	0.00012222	0.0233807	7.05139	4.87768	2.15763	6.24261	0	0	2.69786	38.3639	174.801	27.6627	7.91987	16.8432
117	ENSG00000163687	DNASE1L3	272.554	-1.89338	0.494431	-3.8294	0.000128455	0.0240486	435.171	1031.63	323.644	193.521	408.851	184.269	41.3672	112.351	54.4025	145.69	187.107	152.642
118	ENSG00000163564	PYHIN1	153.008	-2.02152	0.529593	-3.81713	0.000135014	0.0248987	429.127	93.8954	546.959	190.4	142.445	70.5226	43.1658	49.325	35.6738	103.274	37.6194	93.6903
119	ENSG00000197471	SPN	296.484	-1.74344	0.456797	-3.81666	0.00013527	0.0248987	698.087	191.449	804.795	467.415	421.899	156.211	62.0509	95.9097	186.395	156.755	99.9884	216.856
120	ENSG00000143669	LYST	633.319	-1.41786	0.37267	-3.80459	0.000142037	0.0259266	1328.68	571.908	1863.11	754.575	546.947	464.843	345.327	365.827	307.686	331.03	268.286	451.608
121	ENSG00000235688	SNTG2-AS1	95.4658	6.5182	1.71451	3.80178	0.000143658	0.0260025	3.02202	6.09711	1.07881	0	0	2.27492	733.819	386.379	3.56738	8.29881	0	1.0527
122	ENSG00000089012	SIRPG	196.274	-2.48704	0.654523	-3.79978	0.000144827	0.0260025	575.192	96.3343	842.554	252.045	132.659	99.3384	8.99288	116.462	37.4575	73.7672	25.7396	94.743
123	ENSG00000257048	LINC02417	3.99133	5.47939	1.44456	3.79313	0.000148761	0.0261667	0	0	0	0	0	0	7.1943	0	3.56738	1.84418	7.91987	27.3702
124	ENSG00000100918	REC8	164.894	-0.821374	0.216591	-3.79228	0.000149268	0.0261667	227.659	160.964	228.709	266.871	216.386	163.036	120.505	116.462	115.94	148.457	98.9984	114.744
125	ENSG00000274767		55.8924	-2.62852	0.693502	-3.79021	0.000150521	0.0261667	71.5212	17.0719	337.669	100.662	33.7084	16.6828	6.29502	19.1819	17.8369	25.8185	15.8397	8.4216
126	ENSG00000130540	SULT4A1	13.6395	5.78408	1.52559	3.79137	0.00014982	0.0261667	0	0	2.15763	0	0	0.758308	92.6267	38.3639	0	27.6627	0	2.1054
127	ENSG00000171658	NMRAL2P	37.1709	3.88673	1.02641	3.78672	0.00015265	0.026328	3.02202	1.21942	4.31526	3.1213	15.2232	1.51662	323.744	54.8055	5.35106	26.7406	5.93991	1.0527
128	ENSG00000117228	GBP1	1423.78	-1.48531	0.393574	-3.77389	0.00016072	0.0270818	3880.28	1358.44	2219.12	1984.37	2319.36	827.314	400.183	667.257	700.098	831.725	578.151	1319.03
129	ENSG00000211787	TRAV8-3	51.3438	-1.8591	0.492624	-3.77388	0.00016073	0.0270818	68.4992	96.3343	67.9653	139.678	96.7759	13.6495	29.6765	23.2923	16.0532	17.5197	10.8898	35.7918
130	ENSG00000160185	UBASH3A	99.1072	-1.84981	0.489691	-3.77751	0.000158401	0.0270818	232.696	65.8487	312.856	127.973	119.611	72.0393	24.2808	35.6236	43.7004	52.5591	16.8297	85.2687
131	ENSG00000026751	SLAMF7	432.758	-2.0634	0.548122	-3.76449	0.00016689	0.0277959	1592.61	178.035	906.204	591.487	701.353	220.668	120.505	139.754	123.966	123.56	80.1887	414.764
132	ENSG00000286481		75.3609	2.6107	0.696545	3.74806	0.000178206	0.0277959	7.05139	51.2157	2.15763	6.24261	9.78632	50.8066	76.4395	86.3187	91.8599	253.575	225.716	43.1607
133	ENSG00000238171		16.9167	-4.00556	1.06723	-3.75322	0.000174579	0.0277959	83.6093	3.65826	74.4382	23.4098	0	6.06646	2.69786	0	0.891844	0.92209	0.989984	6.3162
134	ENSG00000272282	LINC02084	119.811	-2.29345	0.61181	-3.74864	0.000177799	0.0277959	255.865	63.4099	668.865	88.1768	60.8927	56.8731	32.3744	43.8444	28.539	47.0266	28.7095	63.162
135	ENSG00000253537	PCDHGA7	12.8108	2.94433	0.786021	3.74587	0.00017977	0.0277959	2.01468	0	2.15763	3.90163	2.17474	6.82477	9.89217	42.4743	51.727	16.5976	13.8598	2.1054
136	ENSG00000164483	SAMD3	53.8946	-1.53252	0.40782	-3.75784	0.000171387	0.0277959	113.83	68.2876	147.798	60.8654	48.9316	40.9486	17.9858	28.7729	24.0798	40.572	17.8197	36.8445
137	ENSG00000211734	TRBV5-1	71.8529	-2.65374	0.705937	-3.75917	0.00017048	0.0277959	69.5065	20.7302	275.098	14.8262	80.4653	282.849	3.59715	35.6236	16.0532	22.1302	11.8798	29.4756
138	ENSG00000245522	LINC02709	37.0143	2.50212	0.668074	3.74528	0.000180196	0.0277959	13.0954	9.75537	8.63051	9.36391	14.1358	11.3746	9.89217	243.885	37.4575	28.5848	31.6795	26.3175
139	ENSG00000185905	C16orf54	93.0843	-1.75296	0.467714	-3.74794	0.00017829	0.0277959	196.431	87.7983	272.94	124.852	115.261	64.4562	10.7915	28.7729	50.8351	67.3126	38.6094	58.9512
140	ENSG00000140853	NLRC5	731.454	-1.28479	0.342201	-3.75449	0.000173691	0.0277959	1316.59	692.631	1407.85	1296.9	787.255	722.668	337.233	235.664	412.032	722.919	293.035	552.668
141	ENSG00000101082	SLA2	138.558	-1.89054	0.50375	-3.75294	0.000174775	0.0277959	351.562	90.2372	456.338	226.295	130.484	54.5982	53.9573	57.5458	54.4025	71.0009	25.7396	90.5322
142	ENSG00000189430	NCR1	19.6192	-1.59997	0.426489	-3.75149	0.000175787	0.0277959	28.2055	18.2913	53.9407	18.7278	29.359	28.8157	10.7915	8.22083	15.1613	5.53254	8.90986	9.4743
143	ENSG00000198821	CD247	297.594	-1.61248	0.430899	-3.74212	0.000182472	0.0279502	545.979	181.694	822.056	590.707	350.133	200.952	99.821	80.8381	157.856	240.666	109.888	190.539
144	ENSG00000237702	TRBV3-1	44.904	-3.12535	0.835709	-3.73975	0.000184201	0.0280189	199.454	2.43884	40.9949	45.2589	175.066	20.4743	0.899288	1.37014	11.594	16.5976	8.90986	15.7905
145	ENSG00000030419	IKZF2	92.0252	-1.38953	0.371876	-3.73655	0.000186566	0.028183	203.483	84.1401	196.344	149.042	90.2516	75.8308	44.9644	58.9159	54.4025	67.3126	22.7696	56.8458
146	ENSG00000162739	SLAMF6	167.754	-1.89494	0.508554	-3.72613	0.000194443	0.0289733	405.958	109.748	587.954	219.272	129.397	134.221	24.2808	64.3965	51.727	142.924	66.329	76.8471
147	ENSG00000228509		32.025	-2.39946	0.643675	-3.72775	0.0001932	0.0289733	55.4038	7.31653	115.433	74.131	36.9706	34.1239	17.9858	1.37014	5.35106	9.2209	5.93991	21.054
148	ENSG00000211810	TRAV29DV5	110.945	-3.5356	0.951028	-3.71766	0.00020108	0.0297598	186.358	57.3128	943.962	3.90163	21.7474	12.1329	6.29502	26.0326	14.2695	6.45463	12.8698	40.0026
149	ENSG00000161267	BDH1	320.371	2.89232	0.778866	3.7135	0.000204409	0.0300494	103.756	103.651	97.0933	79.5932	46.7569	25.7825	1062.96	13.7014	738.447	1157.22	21.7797	393.71
150	ENSG00000115041	KCNIP3	110.976	2.44848	0.660239	3.70848	0.000208507	0.0304476	67.4918	7.31653	5.39407	39.0163	45.6695	40.9486	376.802	258.956	255.959	150.301	55.4391	28.4229
151	ENSG00000235831	BHLHE40-AS1	81.2861	-1.62896	0.440813	-3.69535	0.000219588	0.0313271	167.219	84.1401	220.078	129.534	72.8537	62.1813	28.7772	76.7277	16.945	38.7278	27.7196	50.5296
152	ENSG00000004799	PDK4	7148.18	2.01352	0.544994	3.69458	0.000220251	0.0313271	4571.31	2866.86	873.839	2340.2	4280.97	2094.45	18334.7	9585.49	6736.1	22189.2	10483.9	1421.15
153	ENSG00000211727	TRBV7-6	33.3134	-3.23734	0.875459	-3.69788	0.000217405	0.0313271	150.094	63.4099	25.8915	71.79	10.8737	38.6737	0	16.4417	1.78369	0	3.95994	16.8432
154	ENSG00000267395	DM1-AS	52.9122	1.7578	0.4755	3.69674	0.000218385	0.0313271	8.05873	28.0467	19.4187	28.8721	38.0579	22.7492	165.469	34.2534	73.1312	49.7929	120.778	46.3188
155	ENSG00000211777	TRAV3	68.7589	-4.00425	1.08776	-3.68119	0.000232151	0.0328067	46.3377	446.308	155.349	7.80326	88.0769	32.6072	0	10.9611	7.13475	0	0	30.5283
156	ENSG00000112137	PHACTR1	233.574	2.58263	0.702956	3.67395	0.000238826	0.0331092	136.998	45.1186	55.0195	49.1605	57.6306	56.8731	727.524	1308.48	65.1046	137.391	93.0585	70.5309
157	ENSG00000135069	PSAT1	211.826	3.1226	0.849729	3.67482	0.000238021	0.0331092	92.6754	29.2661	56.0983	10.9246	25.0095	47.7734	614.214	1383.84	28.539	142.002	99.9884	11.5797
158	ENSG00000104953	TLE6	101.354	2.90299	0.789497	3.67701	0.000235986	0.0331092	24.1762	17.0719	43.1526	9.36391	36.9706	12.8912	61.1516	501.47	50.8351	428.772	18.8097	11.5797
159	ENSG00000273102		646.315	3.39794	0.925393	3.67189	0.000240768	0.0331684	58.4258	306.075	103.566	8.58359	151.144	44.7402	203.239	3181.46	2334.85	1253.12	98.9984	11.5797
160	ENSG00000081051	AFP	160.131	2.84694	0.77659	3.66595	0.000246425	0.0335261	30.2202	26.8273	58.256	31.9934	68.5043	18.9577	8.09359	15.0715	846.36	382.667	185.127	249.49
161	ENSG00000230020	NHS-AS1	32.6341	3.78936	1.0334	3.66688	0.000245525	0.0335261	1.00734	17.0719	1.07881	2.34098	5.43685	0	195.146	84.9486	0.891844	23.9743	54.4491	5.2635
162	ENSG00000238120	LINC01589	32.0514	3.75058	1.0262	3.65481	0.000257375	0.0347996	12.0881	7.31653	6.47288	0	1.08737	0	224.822	13.7014	13.3777	9.2209	88.1086	8.4216
163	ENSG00000120875	DUSP4	211.68	-1.67633	0.459143	-3.651	0.000261218	0.0351026	601.383	182.913	534.013	261.409	192.464	162.278	56.6551	124.683	41.0248	164.132	79.1987	140.009
164	ENSG00000187288	CIDEC	38.196	6.20143	1.70076	3.64627	0.000266073	0.0355369	3.02202	2.43884	0	0.780326	0	0	1.79858	43.8444	0	329.186	76.2288	1.0527
165	ENSG00000162105	SHANK2	336.876	1.23357	0.339665	3.63173	0.000281529	0.0373734	216.578	156.086	145.64	120.951	306.638	260.1	494.608	593.27	313.929	517.293	673.189	244.226
166	ENSG00000185652	NTF3	136.135	3.33064	0.918535	3.62604	0.000287806	0.0379765	2.01468	9.75537	22.6551	31.9934	44.5821	36.3988	19.7843	1097.48	18.7287	253.575	19.7997	76.8471
167	ENSG00000259511	UBE2Q2L	10.5814	2.38727	0.661778	3.60735	0.000309337	0.0405731	5.0367	1.21942	7.5517	2.34098	1.08737	3.03323	13.4893	31.5132	2.67553	21.2081	17.8197	20.0013
168	ENSG00000232518		11.1918	-3.53606	0.981098	-3.60419	0.000313127	0.0405902	60.4405	8.53595	21.5763	23.4098	7.61158	2.27492	0	0	0.891844	4.61045	4.94992	0
169	ENSG00000078596	ITM2A	700.011	-1.59431	0.443102	-3.59807	0.000320585	0.0405902	1177.58	1403.55	1701.29	482.241	973.195	572.523	294.966	356.236	115.94	571.696	194.037	556.878
170	ENSG00000236751	LINC01186	455.944	2.01441	0.559178	3.60245	0.000315227	0.0405902	112.822	354.852	214.684	121.731	241.396	40.9486	1848.04	937.174	217.61	386.356	550.431	445.292
171	ENSG00000234789		10.7708	5.35514	1.48832	3.59812	0.000320529	0.0405902	0	1.21942	2.15763	0	0	0	45.8637	0	37.4575	40.572	1.97997	0
172	ENSG00000262074	SNORD3B-2	23.3847	-2.15443	0.598596	-3.59915	0.000319264	0.0405902	35.2569	53.6545	76.5958	7.02293	22.8348	33.3656	2.69786	13.7014	2.67553	8.29881	11.8798	12.6324
173	ENSG00000185022	MAFF	414.326	1.12044	0.311044	3.60219	0.000315553	0.0405902	179.307	236.568	176.926	294.963	249.008	428.444	767.992	654.926	431.653	701.711	517.762	332.653
174	ENSG00000124203	ZNF831	55.0414	-1.97454	0.549039	-3.59635	0.000322709	0.0406242	119.874	49.9963	197.423	89.7375	26.0969	43.2236	8.09359	26.0326	17.8369	39.6499	9.89984	32.6337
175	ENSG00000116824	CD2	1330.98	-1.99642	0.555803	-3.59196	0.000328204	0.0407971	3596.21	703.606	5137.31	1392.88	1299.41	641.529	190.649	587.789	357.629	813.284	334.615	916.902
176	ENSG00000261012		32.5281	3.60097	1.00324	3.58933	0.000331532	0.0407971	14.1028	4.87768	7.5517	0	1.08737	2.27492	18.885	157.566	44.5922	123.56	15.8397	0
177	ENSG00000134061	CD180	114.545	-1.2572	0.350217	-3.58978	0.00033096	0.0407971	175.277	71.9458	259.994	166.99	189.202	105.405	36.8708	73.9874	79.3741	60.8579	68.3089	86.3214
178	ENSG00000019582	CD74	220910	-1.26205	0.351271	-3.59282	0.000327122	0.0407971	474265	187570	575728	216620	238925	177753	97429.8	134431	132840	123606	112553	179196
179	ENSG00000257067	LINC02703	96.2204	3.75676	1.0485	3.58296	0.000339717	0.0415708	23.1688	17.0719	10.7881	0	19.5726	9.0997	10.7915	767.277	3.56738	254.497	18.8097	20.0013
180	ENSG00000184828	ZBTB7C	126.436	3.54711	0.991711	3.57676	0.000347886	0.0423338	45.3303	15.8525	17.261	8.58359	17.3979	15.1662	77.3388	844.005	0.891844	452.746	7.91987	14.7378
181	ENSG00000112149	CD83	422.806	-1.21939	0.341727	-3.5683	0.000359298	0.043481	432.149	685.315	719.569	553.251	717.664	441.335	139.39	228.813	284.498	154.911	217.797	498.98
182	ENSG00000232862		4.22589	-4.4846	1.25819	-3.56433	0.000364782	0.0439021	5.0367	17.0719	15.1034	8.58359	0	3.03323	0	0	0.891844	0	0.989984	0
183	ENSG00000283063	TRBV6-2	59.016	-5.23544	1.47108	-3.55891	0.000372403	0.0443321	592.316	86.5789	3.23644	0.780326	5.43685	1.51662	0	1.37014	0.891844	4.61045	1.97997	9.4743
184	ENSG00000257924	LINC02416	6.29351	-4.52067	1.27001	-3.55956	0.00037147	0.0443321	2.01468	1.21942	44.2314	7.02293	4.34948	12.8912	0	2.74028	0	0	0	1.0527
185	ENSG00000196878	LAMB3	259.294	2.64796	0.745608	3.55141	0.000383169	0.0447036	95.6974	149.989	69.0441	47.5999	41.32	25.0242	629.502	104.13	97.211	1679.13	79.1987	93.6903
186	ENSG00000074211	PPP2R2C	7.34697	5.86442	1.65094	3.55216	0.000382081	0.0447036	1.00734	0	0	0	0	0	72.8423	0	1.78369	4.61045	7.91987	0
187	ENSG00000211788	TRAV13-1	30.5091	-2.00602	0.564908	-3.55106	0.000383687	0.0447036	80.5873	28.0467	72.2805	51.5015	38.0579	21.9909	1.79858	19.1819	4.45922	11.9872	9.89984	26.3175
188	ENSG00000086696	HSD17B2	130.339	2.20913	0.621764	3.553	0.000380869	0.0447036	74.5432	99.9925	7.5517	10.1442	50.019	36.3988	176.26	306.911	42.8085	234.211	399.954	125.271
189	ENSG00000185168	LINC00482	460.677	2.95384	0.832542	3.54797	0.00038821	0.0449913	28.2055	49.9963	32.3644	184.937	208.775	127.396	3343.55	882.369	141.803	91.2869	373.224	64.2147
190	ENSG00000202538	RNU4-2	373.786	-2.52665	0.712632	-3.54552	0.000391835	0.0451724	299.18	804.818	2252.56	202.104	152.232	111.471	54.8566	67.1368	44.5922	267.406	56.4291	172.643
191	ENSG00000160791	CCR5	352.7	-1.71749	0.485414	-3.5382	0.000402858	0.0462	740.396	159.744	1005.45	740.529	406.676	192.61	74.6409	156.196	206.016	181.652	98.9984	269.491
192	ENSG00000225720		34.2464	-2.65953	0.754031	-3.52708	0.000420167	0.0479341	115.844	12.1942	151.034	59.3048	8.69895	7.58308	12.59	10.9611	7.13475	2.76627	4.94992	17.8959
193	ENSG00000155719	OTOA	163.46	-2.00755	0.569584	-3.5246	0.000424129	0.0481353	200.461	89.0177	578.244	101.442	376.23	225.976	87.2309	13.7014	69.5638	20.286	109.888	89.4795
194	ENSG00000198910	L1CAM	11.0899	-2.0026	0.568605	-3.52195	0.000428384	0.0483676	25.1835	6.09711	25.8915	27.3114	13.0484	9.0997	4.49644	2.74028	4.45922	6.45463	1.97997	6.3162
195	ENSG00000162654	GBP4	1746.31	-1.5293	0.435958	-3.5079	0.000451656	0.0500195	3756.37	1245.03	2946.24	3979.66	2442.23	1194.34	430.759	528.873	678.693	1408.95	693.979	1650.63
196	ENSG00000158050	DUSP2	273.605	-1.70903	0.48765	-3.50462	0.000457253	0.0500195	504.678	213.399	859.815	461.953	173.979	300.29	29.6765	130.163	93.6436	222.224	170.277	123.166
197	ENSG00000167165	UGT1A6	19.499	2.01852	0.576126	3.50361	0.000458999	0.0500195	2.01468	17.0719	7.5517	2.34098	11.9611	6.06646	16.1872	41.1041	40.133	10.143	42.5693	36.8445
198	ENSG00000186493	C5orf38	64.3382	3.27147	0.932106	3.50977	0.000448499	0.0500195	5.0367	23.169	1.07881	10.9246	8.69895	23.5075	515.292	30.143	18.7287	118.95	4.94992	11.5797
199	ENSG00000198785	GRIN3A	10.2491	-3.61135	1.03022	-3.50541	0.000455896	0.0500195	49.3597	3.65826	37.7585	7.80326	11.9611	3.03323	0	1.37014	0	0	5.93991	2.1054
200	ENSG00000126562	WNK4	147.676	3.19892	0.911743	3.50858	0.000450507	0.0500195	14.1028	41.4603	14.0246	17.1672	53.2811	34.1239	24.2808	337.054	63.3209	1150.77	9.89984	12.6324
201	ENSG00000286587		13.9938	5.03181	1.43581	3.50451	0.000457449	0.0500195	1.00734	0	0	0	3.26211	0.758308	0	113.721	25.8635	21.2081	0	2.1054
202	ENSG00000073792	IGF2BP2	89.5106	3.76949	1.07824	3.49595	0.000472371	0.0500499	19.1395	24.3884	3.23644	4.68196	13.0484	9.0997	0.899288	120.572	91.8599	781.01	1.97997	4.2108
203	ENSG00000074966	TXK	66.9998	-2.06314	0.590018	-3.49674	0.00047098	0.0500499	246.799	25.6078	237.339	56.1835	52.1937	30.3323	23.3815	41.1041	30.3227	16.5976	17.8197	26.3175
204	ENSG00000249574		4.80176	3.44749	0.985807	3.49713	0.000470301	0.0500499	2.01468	1.21942	0	1.56065	0	0	14.3886	19.1819	3.56738	4.61045	7.91987	3.1581
205	ENSG00000147570	DNAJC5B	89.3327	-2.55969	0.732762	-3.49321	0.000477244	0.0500499	250.828	63.4099	226.551	55.4031	274.017	46.2568	27.8779	21.9222	8.91844	0	50.4892	46.3188
206	ENSG00000109943	CRTAM	70.4211	-1.72009	0.491781	-3.49768	0.000469329	0.0500499	148.079	60.9711	234.103	87.3965	67.4169	50.0483	15.2879	38.3639	15.1613	50.715	22.7696	54.7404
207	ENSG00000278376		1084.94	1.3656	0.3908	3.49437	0.000475191	0.0500499	567.133	823.109	507.043	433.861	618.713	690.06	1210.44	2194.96	1729.29	344.862	2200.74	1699.06
208	ENSG00000156127	BATF	267.014	-2.03604	0.582483	-3.49545	0.000473259	0.0500499	967.047	115.845	774.589	341.002	244.658	132.704	37.7701	110.981	65.9965	156.755	50.4892	206.329
209	ENSG00000118271	TTR	6.93994	5.78344	1.65571	3.49304	0.000477558	0.0500499	0	0	0	0	0	0.758308	0	1.37014	15.1613	4.61045	61.379	0
210	ENSG00000287566		32.3553	5.98365	1.71526	3.48848	0.000485767	0.0506678	2.01468	0	0	2.34098	0	1.51662	0	143.864	0.891844	231.445	1.97997	4.2108
211	ENSG00000278558	TMEM191B	32.6227	-3.92717	1.12668	-3.48562	0.000490994	0.0509702	43.3157	0	154.27	53.8425	70.679	45.4985	0	0	18.7287	0	1.97997	3.1581
212	ENSG00000258346		11.7	3.72332	1.07004	3.47961	0.000502153	0.0517039	0	0	2.15763	0.780326	5.43685	1.51662	0.899288	79.468	2.67553	11.9872	4.94992	30.5283
213	ENSG00000186897	C1QL4	115.064	-3.38864	0.974068	-3.47885	0.000503562	0.0517039	16.1175	418.261	28.0492	41.3573	13.0484	743.9	13.4893	0	56.1862	12.9093	23.7596	13.6851
214	ENSG00000237484	LINC01684	17.7488	-2.26986	0.652632	-3.47801	0.000505143	0.0517039	64.4698	8.53595	48.5466	29.6524	14.1358	10.6163	3.59715	9.59097	1.78369	6.45463	2.96995	12.6324
215	ENSG00000214900	LINC01588	119.378	1.97987	0.570511	3.47034	0.000519797	0.0527113	60.4405	96.3343	31.2856	17.1672	60.8927	24.2659	348.024	360.346	58.8617	134.625	195.027	45.2661
216	ENSG00000128918	ALDH1A2	80.4507	2.03149	0.585182	3.47155	0.000517471	0.0527113	8.05873	48.7768	62.5712	14.8262	38.0579	18.1994	294.067	116.462	67.7801	196.405	63.359	36.8445
217	ENSG00000255760	LINC02422	100.939	-1.114	0.322505	-3.45422	0.000551894	0.0557082	212.549	131.697	135.931	151.383	85.9022	109.955	71.943	106.871	65.1046	48.8708	41.5793	49.4769
218	ENSG00000158869	FCER1G	7880.82	-1.51037	0.437679	-3.45086	0.000558805	0.0560478	19021.6	5566.66	21554.7	6378.38	11106.4	6370.55	1892.1	5899.81	2917.22	5183.07	2876.89	5802.48
219	ENSG00000213279		25.4109	3.24381	0.940206	3.4501	0.000560376	0.0560478	1.00734	3.65826	9.70933	3.1213	8.69895	3.03323	107.915	142.494	1.78369	11.0651	2.96995	9.4743
220	ENSG00000148702	HABP2	812.264	5.74254	1.66713	3.44456	0.000571993	0.056692	100.734	3.65826	0	9.36391	61.98	3.03323	2199.66	4.11041	15.1613	7325.08	13.8598	10.527
221	ENSG00000073150	PANX2	31.4945	3.79659	1.10215	3.44472	0.000571661	0.056692	8.05873	0	6.47288	0	8.69895	2.27492	31.4751	71.2472	2.67553	194.561	52.4692	0
222	ENSG00000182866	LCK	450.877	-1.69409	0.492261	-3.44145	0.000578602	0.0570887	1110.09	312.172	1421.88	589.926	420.812	278.299	64.7487	182.228	191.746	302.446	177.207	358.971
223	ENSG00000115956	PLEK	516.045	-1.47392	0.429771	-3.42954	0.000604595	0.0575785	1240.04	310.952	1303.21	686.687	718.751	293.465	146.584	316.502	284.498	314.433	174.237	403.184
224	ENSG00000247193		14.4105	-2.41027	0.702094	-3.43297	0.000597014	0.0575785	43.3157	8.53595	52.8619	9.36391	25.0095	6.06646	1.79858	8.22083	0.891844	5.53254	3.95994	7.3689
225	ENSG00000243537	RPL32P20	28.4271	2.80428	0.817371	3.43086	0.000601679	0.0575785	6.04405	13.4136	4.31526	2.34098	10.8737	6.06646	2.69786	71.2472	130.209	78.3777	3.95994	11.5797
226	ENSG00000119397	CNTRL	191.799	-0.997915	0.290414	-3.43619	0.000589964	0.0575785	356.599	139.014	305.304	282.478	241.396	208.535	111.512	141.124	131.101	170.587	79.1987	134.746
227	ENSG00000255968		11.8074	3.40903	0.992626	3.43435	0.000593974	0.0575785	0	6.09711	3.23644	0.780326	0	2.27492	0.899288	69.877	16.0532	6.45463	29.6995	6.3162
228	ENSG00000149633	KIAA1755	48.7361	3.01085	0.876866	3.43364	0.000595528	0.0575785	5.0367	10.9748	7.5517	15.6065	16.3105	9.0997	27.8779	1.37014	166.775	295.069	4.94992	24.2121
229	ENSG00000116032	GRIN3B	6.01283	-5.01781	1.46279	-3.43031	0.000602896	0.0575785	0	31.7049	9.70933	3.90163	0	25.0242	0	0	0.891844	0.92209	0	0
230	ENSG00000099994	SUSD2	962.657	2.14442	0.624453	3.43407	0.000594588	0.0575785	86.6313	625.563	128.379	207.567	428.423	654.42	508.997	1064.6	1276.23	3696.66	2567.03	307.388
231	ENSG00000103175	WFDC1	72.4816	2.0374	0.594417	3.42756	0.000609043	0.0577509	23.1688	51.2157	16.1822	43.6983	8.69895	27.2991	75.5402	153.455	9.81028	229.6	140.578	90.5322
232	ENSG00000257838	OTOAP1	191.37	-1.73332	0.506055	-3.42517	0.000614426	0.0580103	144.05	121.942	726.042	81.1539	462.132	230.526	135.792	64.3965	65.1046	81.1439	84.1487	100.007
233	ENSG00000231948	HS1BP3-IT1	39.5631	3.50198	1.02286	3.42373	0.000617688	0.058068	0	4.87768	1.07881	9.36391	21.7474	1.51662	93.526	130.163	3.56738	14.7534	192.057	2.1054
234	ENSG00000117834	SLC5A9	445.115	1.42904	0.417891	3.41964	0.000627049	0.0583981	186.358	242.665	336.59	350.366	158.756	171.378	252.7	996.09	260.418	1074.24	728.628	583.196
235	ENSG00000229743	LINC01159	461.046	2.56611	0.750583	3.41882	0.000628938	0.0583981	61.4478	196.327	102.487	146.701	90.2516	201.71	187.052	3271.89	535.998	30.429	335.605	372.656
236	ENSG00000254827	SLC22A18AS	661.723	1.7248	0.504518	3.41871	0.000629198	0.0583981	99.7268	613.369	352.772	198.983	343.609	236.592	739.215	1446.87	883.817	978.338	1846.32	201.066
237	ENSG00000165899	OTOGL	24.7513	2.46208	0.720657	3.41644	0.000634466	0.0586386	3.02202	12.1942	6.47288	6.24261	11.9611	6.06646	105.217	10.9611	21.4043	37.8057	1.97997	73.689
238	ENSG00000231389	HLA-DPA1	37103.8	-1.54641	0.453236	-3.41193	0.000645039	0.0593652	80273	30886.7	117099	31180.3	43838.4	28410.8	6156.53	26450.5	17836	23163.8	14301.3	25649
239	ENSG00000185304	RGPD2	29.5753	-2.88516	0.846631	-3.40781	0.000654857	0.0595187	44.323	7.31653	137.009	14.8262	5.43685	103.888	4.49644	4.11041	7.13475	18.4418	7.91987	0
240	ENSG00000272382		23.0087	-2.20098	0.645801	-3.40813	0.000654086	0.0595187	35.2569	54.8739	20.4975	14.0459	8.69895	93.2719	9.89217	6.85069	8.0266	1.84418	4.94992	17.8959
241	ENSG00000088002	SULT2B1	65.0839	2.82609	0.828777	3.40996	0.000649735	0.0595187	12.0881	6.09711	26.9704	4.68196	13.0484	33.3656	68.3459	339.794	37.4575	225.912	6.92989	6.3162
242	ENSG00000235169	SMIM1	691.729	0.923845	0.271379	3.40426	0.000663434	0.060049	377.753	385.337	497.333	602.412	490.404	511.1	1125.91	1019.38	733.988	1150.77	449.453	956.904
243	ENSG00000268836		25.5703	-1.44049	0.423546	-3.40102	0.000671353	0.0605157	24.1762	48.7768	46.389	30.4327	25.0095	50.0483	26.9786	8.22083	16.0532	10.143	6.92989	13.6851
244	ENSG00000258875		27.0026	-2.34261	0.690153	-3.39433	0.000687964	0.0617589	51.3744	18.2913	140.246	18.7278	28.2716	13.6495	4.49644	8.22083	9.81028	1.84418	5.93991	23.1594
245	ENSG00000158467	AHCYL2	485.359	1.76774	0.521605	3.38903	0.000701405	0.062581	165.204	120.723	334.432	206.006	191.377	304.082	1729.33	1105.7	562.754	688.801	131.668	284.229
246	ENSG00000007237	GAS7	241.785	-1.45465	0.429294	-3.38847	0.000702836	0.062581	484.531	153.647	606.294	436.202	301.201	144.079	72.8423	109.611	148.938	191.795	72.2689	180.012
247	ENSG00000276085	CCL3L3	277.197	-1.86181	0.549788	-3.38642	0.000708113	0.0627956	183.336	593.858	1038.9	249.704	250.095	292.707	58.4537	101.39	25.8635	109.729	212.847	209.487
248	ENSG00000226912	ISCA2P1	5.42499	5.40226	1.59777	3.38112	0.000721912	0.0637612	0	1.21942	0	0	0	0	2.69786	43.8444	5.35106	11.9872	0	0
249	ENSG00000135338	LCA5	124.382	-0.989249	0.29296	-3.37674	0.000733493	0.0642818	177.292	135.356	149.955	161.527	140.271	228.251	74.6409	67.1368	90.9681	123.56	42.5693	101.059
250	ENSG00000111728	ST8SIA1	69.0303	-2.40599	0.712531	-3.37668	0.000733677	0.0642818	230.681	39.0215	196.344	146.701	47.8442	36.3988	4.49644	12.3312	16.0532	54.4033	1.97997	42.108
251	ENSG00000180432	CYP8B1	255.962	2.88814	0.856154	3.37339	0.000742484	0.0647943	203.483	92.676	5.39407	6.24261	26.0969	31.8489	76.4395	1048.16	750.041	679.58	83.1587	68.4255
252	ENSG00000179144	GIMAP7	1595.94	-1.23696	0.367739	-3.3637	0.000769063	0.0663211	2488.13	2460.79	3863.23	1336.7	2281.3	1016.13	662.775	1157.77	519.053	1198.72	844.457	1322.19
253	ENSG00000164604	GPR85	52.0648	-2.04851	0.608631	-3.36576	0.000763318	0.0663211	37.2716	29.2661	46.389	260.629	30.4463	99.3384	33.2737	5.48055	15.1613	28.5848	16.8297	22.1067
254	ENSG00000130829	DUSP9	6.53125	3.72154	1.10618	3.36431	0.000767349	0.0663211	2.01468	0	1.07881	0	0	2.27492	14.3886	6.85069	1.78369	40.572	0.989984	8.4216
255	ENSG00000183918	SH2D1A	205.654	-1.98656	0.592164	-3.35474	0.000794396	0.0680802	495.612	112.187	918.071	174.793	154.406	115.263	30.5758	98.6499	57.9699	94.0532	42.5693	173.696
256	ENSG00000140368	PSTPIP1	233.238	-1.60704	0.479099	-3.35429	0.000795678	0.0680802	593.324	209.74	650.525	333.199	195.726	125.121	51.2594	69.877	173.91	187.184	74.2488	134.746
257	ENSG00000188706	ZDHHC9	1149.86	0.813454	0.243133	3.34571	0.000820715	0.0699492	687.007	1159.67	656.998	994.135	927.526	579.347	1002.71	1574.29	1635.64	1422.79	1609.71	1548.52
258	ENSG00000286374		4.31042	5.58582	1.67066	3.34347	0.000827373	0.0702433	0	0	0	0	0	0	29.6765	19.1819	0.891844	0.92209	0	1.0527
259	ENSG00000180543	TSPYL5	156.808	1.67888	0.503086	3.33715	0.000846418	0.0715828	140.02	37.8021	93.8568	67.8884	72.8537	35.6405	282.376	227.443	478.028	223.146	41.5793	181.064
260	ENSG00000180535	BHLHA15	151.587	2.02067	0.605998	3.33445	0.000854677	0.0720032	81.5946	17.0719	19.4187	74.9113	72.8537	93.2719	153.778	150.715	168.559	107.885	797.927	81.0579
261	ENSG00000211710	TRBV4-1	24.6669	-2.3399	0.701979	-3.33329	0.00085825	0.0720272	37.2716	4.87768	61.4924	96.7604	31.5337	14.4079	4.49644	20.5521	0.891844	7.37672	7.91987	8.4216
262	ENSG00000224137	LINC01857	109.881	-1.9009	0.573141	-3.31664	0.000911084	0.075769	200.461	80.4818	357.087	78.0326	198.989	125.121	28.7772	21.9222	52.6188	8.29881	42.5693	124.219
263	ENSG00000147443	DOK2	278.871	-1.41246	0.425829	-3.31697	0.00090999	0.075769	418.047	252.42	847.948	363.632	372.968	178.202	102.519	80.8381	190.855	212.081	90.0886	236.858
264	ENSG00000126264	HCST	2438.97	-1.42515	0.429783	-3.31598	0.000913213	0.075769	5237.17	1801.08	7054.37	2608.63	2921.76	1703.16	586.336	1278.34	1024.73	1955.75	1091.95	2004.34
265	ENSG00000227507	LTB	506.146	-1.3256	0.401048	-3.30535	0.000948591	0.0784073	896.533	340.218	1055.08	898.935	741.586	409.486	121.404	174.008	354.954	380.823	238.586	462.135
266	ENSG00000172216	CEBPB	1702.95	2.07114	0.6272	3.3022	0.000959293	0.0789938	1197.73	419.481	507.043	567.297	588.267	648.353	3136.72	3204.75	476.245	8229.65	1083.04	376.867
267	ENSG00000124507	PACSIN1	23.2045	-2.34906	0.712891	-3.29511	0.000983817	0.0807098	85.624	9.75537	76.5958	22.6295	25.0095	13.6495	8.09359	0	5.35106	19.3639	3.95994	8.4216
268	ENSG00000222042		10.5136	-4.01789	1.22016	-3.29292	0.000991539	0.0810398	58.4258	3.65826	40.9949	14.0459	0	1.51662	0	2.74028	2.67553	0	0	2.1054
269	ENSG00000143851	PTPN7	211.096	-1.74306	0.530304	-3.28691	0.00101295	0.0813668	457.333	91.4566	701.229	393.284	170.717	136.495	26.0794	80.8381	138.236	118.028	75.2388	144.22
270	ENSG00000154277	UCHL1	206.009	2.43282	0.740375	3.28593	0.00101647	0.0813668	46.3377	84.1401	134.852	21.0688	63.0674	37.1571	679.862	868.667	53.5106	401.109	29.6995	52.635
271	ENSG00000250620	LINC02515	7.27266	-3.75407	1.14199	-3.28731	0.00101148	0.0813668	17.1248	1.21942	43.1526	15.6065	1.08737	3.03323	2.69786	1.37014	0	0	1.97997	0
272	ENSG00000255689		3.69921	3.85103	1.17248	3.28453	0.00102154	0.0813668	2.01468	0	0	0	0	0.758308	14.3886	1.37014	5.35106	5.53254	12.8698	2.1054
273	ENSG00000256714		3.73974	-4.30382	1.30912	-3.28758	0.00101054	0.0813668	16.1175	1.21942	9.70933	11.7049	3.26211	0.758308	0	0	0	0	0	2.1054
274	ENSG00000125245	GPR18	40.0244	-1.76841	0.537967	-3.2872	0.00101188	0.0813668	91.668	20.7302	117.591	65.5474	50.019	25.7825	9.89217	15.0715	32.1064	8.29881	9.89984	33.6864
275	ENSG00000276649		177.75	1.79393	0.546169	3.28456	0.0010214	0.0813668	53.3891	80.4818	76.5958	100.662	44.5821	121.329	703.243	312.391	130.209	41.4941	329.665	138.956
276	ENSG00000157514	TSC22D3	7942.25	1.86088	0.56712	3.28128	0.00103337	0.0819415	8427.41	3660.7	2181.36	1642.59	2620.56	2042.12	11372.4	20645.2	5381.39	25979	9341.49	2012.76
277	ENSG00000101255	TRIB3	1684.08	2.13604	0.651132	3.2805	0.00103624	0.0819415	591.309	641.415	265.388	350.366	551.296	1345.24	5144.83	7371.34	723.286	1797.15	1114.72	312.652
278	ENSG00000186301	MST1P2	57.8731	1.86271	0.568748	3.2751	0.00105626	0.0832238	25.1835	23.169	15.1034	31.213	22.8348	31.8489	69.2452	149.345	124.858	68.2347	3.95994	129.482
279	ENSG00000147168	IL2RG	438.473	-1.46221	0.446702	-3.27334	0.00106286	0.0834437	982.157	273.15	977.406	845.873	469.744	312.423	101.62	158.936	205.124	451.824	179.187	304.23
280	ENSG00000149571	KIRREL3	9.71713	5.2139	1.59395	3.27105	0.00107148	0.0835218	3.02202	0	0	0	0	0	3.59715	1.37014	89.1844	18.4418	0.989984	0
281	ENSG00000260260	SNHG19	2034.92	1.28701	0.393345	3.27197	0.001068	0.0835218	996.26	1794.99	845.79	782.667	1631.05	1047.98	1851.63	2429.25	3634.26	1355.47	2066.1	5983.55
282	ENSG00000009790	TRAF3IP3	540.262	-1.63662	0.500506	-3.26993	0.00107574	0.0835565	1411.28	418.261	1762.78	552.471	440.385	320.006	80.9359	331.573	234.555	298.757	207.897	424.238
283	ENSG00000122223	CD244	67.6907	-1.46693	0.449591	-3.2628	0.00110317	0.0839379	153.116	63.4099	174.768	92.0785	79.378	34.1239	21.5829	21.9222	49.9433	34.1173	25.7396	62.1093
284	ENSG00000197826	CFAP299	59.8477	2.46984	0.756742	3.26378	0.00109938	0.0839379	13.0954	25.6078	9.70933	7.80326	31.5337	21.9909	17.9858	428.853	21.4043	58.0917	16.8297	65.2674
285	ENSG00000146950	SHROOM2	107.138	1.25942	0.385993	3.26281	0.00110313	0.0839379	66.4845	99.9925	42.0738	71.0097	54.3685	45.4985	215.829	126.053	90.0763	272.939	128.698	72.6363
286	ENSG00000138109	CYP2C9	87.2352	3.33766	1.02298	3.26268	0.00110364	0.0839379	15.1101	20.7302	0	48.3802	2.17474	7.58308	108.814	197.3	16.945	562.475	0.989984	66.3201
287	ENSG00000123329	ARHGAP9	374.107	-1.41752	0.43408	-3.26558	0.00109241	0.0839379	718.234	245.104	1186.7	490.825	368.618	257.066	103.418	211.001	214.934	332.875	158.397	202.118
288	ENSG00000128965	CHAC1	45.4244	2.47636	0.758166	3.26625	0.00108982	0.0839379	15.1101	17.0719	20.4975	12.4852	8.69895	9.0997	90.8281	308.281	12.4858	23.0523	14.8498	12.6324
289	ENSG00000156414	TDRD9	37.1262	3.53281	1.08533	3.25506	0.00113369	0.0859253	3.02202	21.9496	4.31526	0.780326	4.34948	1.51662	0.899288	19.1819	222.069	161.366	3.95994	2.1054
290	ENSG00000141682	PMAIP1	55.9828	-1.64155	0.50601	-3.2441	0.00117821	0.0884271	124.91	80.4818	171.531	50.7212	35.8832	44.7402	17.9858	38.3639	16.0532	19.3639	13.8598	57.8985
291	ENSG00000266521		5.14358	-3.28243	1.01186	-3.24396	0.00117881	0.0884271	2.01468	7.31653	26.9704	7.80326	7.61158	4.54985	0.899288	0	3.56738	0	0.989984	0
292	ENSG00000205424	PCBP3-AS1	21.0802	6.33506	1.95228	3.24496	0.00117467	0.0884271	3.02202	0	0	0	0	0	4.49644	209.631	0	13.8314	1.97997	20.0013
293	ENSG00000187210	GCNT1	112.585	-1.75882	0.543266	-3.2375	0.00120583	0.0901453	338.467	60.9711	379.743	104.564	110.912	48.5317	42.2665	32.8833	44.5922	86.6765	27.7196	73.689
294	ENSG00000103522	IL21R	94.7206	-1.59349	0.492373	-3.23635	0.00121069	0.0902004	267.953	32.9244	214.684	174.013	100.038	63.6979	26.9786	60.2861	38.3493	55.3254	28.7095	73.689
295	ENSG00000183696	UPP1	1117.91	1.02493	0.317269	3.23048	0.00123582	0.0917609	614.478	751.163	692.599	699.172	736.149	925.894	2106.13	2536.13	856.17	1251.28	1423.6	822.159
296	ENSG00000204385	SLC44A4	209.854	2.50417	0.775498	3.22912	0.00124173	0.0918882	9.06607	110.967	63.65	29.6524	125.047	39.432	158.275	108.241	31.2145	77.4556	1248.37	516.876
297	ENSG00000255202		19.2865	3.37711	1.0481	3.22212	0.00127246	0.0938451	3.02202	2.43884	4.31526	3.1213	7.61158	0	8.99288	4.11041	16.945	0	152.458	28.4229
298	ENSG00000169876	MUC17	70.9563	9.66852	3.00359	3.21899	0.00128644	0.0941257	0	0	1.07881	0	0	0	607.919	0	0	0.92209	241.556	0
299	ENSG00000101849	TBL1X	808.314	1.01523	0.315403	3.21882	0.00128717	0.0941257	362.643	604.833	348.457	559.494	685.043	649.87	977.526	1272.86	1467.98	999.546	1298.86	472.662
300	ENSG00000167207	NOD2	76.5657	-1.62743	0.505668	-3.21838	0.00128916	0.0941257	247.806	56.0934	139.167	129.534	82.6401	38.6737	17.9858	47.9548	69.5638	21.2081	20.7897	47.3715
301	ENSG00000272620	AFAP1-AS1	151.868	5.58086	1.73751	3.21199	0.00131819	0.0958302	2.01468	2.43884	8.63051	1.56065	17.3979	5.30816	1257.2	524.763	0	0	0.989984	2.1054
302	ENSG00000140749	IGSF6	820.636	-1.21052	0.377147	-3.20967	0.00132885	0.0958302	1632.9	376.801	1924.6	603.972	1291.79	1046.47	485.616	449.405	619.832	502.539	366.294	547.404
303	ENSG00000108379	WNT3	76.2326	1.88669	0.587594	3.21088	0.00132329	0.0958302	24.1762	15.8525	23.7339	95.9801	7.61158	26.5408	207.736	89.059	46.3759	207.47	120.778	49.4769
304	ENSG00000100351	GRAP2	62.0947	-1.29011	0.401977	-3.20943	0.00133	0.0958302	131.962	40.2409	147.798	84.2752	81.5527	43.2236	19.7843	30.143	43.7004	42.4161	32.6695	47.3715
305	ENSG00000125878	TCF15	109.414	2.82153	0.879553	3.20791	0.00133702	0.0960198	13.0954	53.6545	12.9458	10.1442	61.98	11.3746	234.714	93.1694	43.7004	758.88	10.8898	8.4216
306	ENSG00000163131	CTSS	5206.98	-1.37193	0.42786	-3.20649	0.00134364	0.0961799	10050.2	2890.03	15818.7	5257.84	8026.96	3026.41	2870.53	2495.02	2733.5	2923.95	1882.95	4507.66
307	ENSG00000140379	BCL2A1	267.178	-1.60811	0.501688	-3.20541	0.0013487	0.0962278	858.255	204.863	593.348	174.793	393.628	188.819	90.8281	178.118	49.9433	86.6765	124.738	262.122
308	ENSG00000238290	ERRFI1-DT	12.6188	2.44447	0.76314	3.20318	0.00135919	0.0964123	2.01468	4.87768	5.39407	8.58359	1.08737	1.51662	11.6907	10.9611	17.8369	71.923	3.95994	11.5797
309	ENSG00000137700	SLC37A4	6450.77	0.549547	0.171573	3.20299	0.00136009	0.0964123	4815.09	5816.64	4704.71	4577.39	5713.04	5793.47	6439.8	9052.5	7363.96	6671.32	9085.09	7376.27
310	ENSG00000134242	PTPN22	85.2333	-1.27203	0.39738	-3.20105	0.00136927	0.096439	176.285	69.507	211.448	120.17	106.562	39.432	44.9644	52.0652	51.727	58.0917	34.6495	57.8985
311	ENSG00000133135	RNF128	970.452	1.05431	0.329313	3.20153	0.00136698	0.096439	593.324	908.469	580.402	457.271	740.498	505.791	1786.89	1748.3	977.461	1256.81	1569.13	521.087
312	ENSG00000132855	ANGPTL3	102.381	-3.46974	1.08573	-3.19577	0.00139459	0.0978027	12.0881	938.954	126.221	1.56065	36.9706	11.3746	21.5829	0	33.8901	8.29881	20.7897	16.8432
313	ENSG00000240045	STRIT1	14.5993	3.41737	1.06986	3.19423	0.00140203	0.0978027	0	1.21942	6.47288	2.34098	4.34948	0.758308	4.49644	0	13.3777	11.9872	121.768	8.4216
314	ENSG00000112333	NR2E1	16.8194	-4.20883	1.31734	-3.19495	0.00139856	0.0978027	3.02202	0	101.409	81.1539	0	6.06646	1.79858	0	5.35106	0	1.97997	1.0527
315	ENSG00000125347	IRF1	2236.03	-1.0202	0.319609	-3.19203	0.00141279	0.0979293	4666	1842.55	3579.51	3264.88	2462.89	2155.11	890.295	1648.28	1597.29	1222.69	1154.32	2348.57
316	ENSG00000133106	EPSTI1	704.478	-1.07169	0.335687	-3.19252	0.00141038	0.0979293	1203.77	745.066	1506.02	741.31	787.255	745.417	476.623	282.248	228.312	477.643	565.281	694.782
317	ENSG00000167208	SNX20	255.143	-1.53199	0.480621	-3.18752	0.00143499	0.099155	757.52	129.259	571.771	410.451	274.017	131.946	56.6551	131.533	189.963	138.314	87.1186	183.17
318	ENSG00000115415	STAT1	2408.72	-1.17018	0.367381	-3.18519	0.00144661	0.0996433	6809.62	2041.31	4505.13	2405.74	2671.67	1578.8	1116.92	1282.45	1539.32	1776.87	1316.68	1860.12
319	ENSG00000132702	HAPLN2	12.2713	2.80896	0.883022	3.18107	0.00146732	0.0999437	1.00734	2.43884	4.31526	0	5.43685	5.30816	7.1943	2.74028	7.13475	77.4556	24.7496	9.4743
320	ENSG00000121797	CCRL2	225.635	-1.00085	0.314665	-3.18069	0.00146922	0.0999437	381.782	203.643	440.156	207.567	392.54	179.719	126.8	164.417	112.372	170.587	122.758	205.277
321	ENSG00000227191	TRGC2	89.6872	-1.84392	0.579619	-3.18125	0.00146639	0.0999437	139.013	75.6041	365.718	131.095	40.2327	90.2387	23.3815	26.0326	11.594	88.5207	23.7596	61.0566
322	ENSG00000128564	VGF	4.83339	-5.70786	1.79372	-3.18214	0.00146192	0.0999437	3.02202	10.9748	0	0.780326	0	43.2236	0	0	0	0	0	0
323	ENSG00000145331	TRMT10A	114.194	0.870032	0.27408	3.17438	0.00150158	0.10006	73.5359	82.9206	67.9653	95.9801	79.378	83.4139	126.8	260.326	114.156	139.236	111.868	134.746
324	ENSG00000184363	PKP3	134.286	6.26878	1.97473	3.17451	0.0015009	0.10006	7.05139	3.65826	5.39407	0	0	4.54985	1380.41	0	3.56738	204.704	0	2.1054
325	ENSG00000211786	TRAV8-2	39.6	-1.59467	0.502293	-3.17479	0.00149947	0.10006	53.3891	60.9711	107.881	67.8884	43.4948	23.5075	3.59715	15.0715	28.539	21.2081	13.8598	35.7918
326	ENSG00000286733	LINC02348	1663.16	1.9322	0.608259	3.1766	0.00149011	0.10006	153.116	1197.47	225.472	647.671	1602.78	317.731	490.112	4076.16	3000.16	4247.15	2644.25	1355.88
327	ENSG00000011590	ZBTB32	14.0179	-2.67912	0.843835	-3.17493	0.00149871	0.10006	63.4625	2.43884	45.3102	19.5081	5.43685	9.0997	5.39573	6.85069	4.45922	0	0.989984	5.2635
328	ENSG00000161643	SIGLEC16	26.1627	-2.578	0.811529	-3.17672	0.0014895	0.10006	156.138	8.53595	52.8619	35.895	1.08737	14.4079	4.49644	5.48055	3.56738	12.9093	5.93991	12.6324
329	ENSG00000233070	ZFY-AS1	100.87	4.78835	1.50856	3.17412	0.00150292	0.10006	13.0954	3.65826	0	11.7049	13.0484	0.758308	113.31	6.85069	0.891844	0	702.889	344.233
330	ENSG00000107984	DKK1	16.5776	-2.81108	0.886271	-3.1718	0.00151496	0.100557	1.00734	74.3847	32.3644	25.7508	18.4853	21.9909	2.69786	5.48055	6.24291	0	0	10.527
331	ENSG00000104814	MAP4K1	198.728	-1.31284	0.414597	-3.16655	0.00154259	0.101906	486.546	123.162	477.915	277.016	184.853	150.903	68.3459	100.02	139.128	137.391	75.2388	164.221
332	ENSG00000160223	ICOSLG	164.236	2.36375	0.746564	3.16617	0.00154459	0.101906	111.815	2.43884	12.9458	79.5932	33.7084	79.6223	775.186	228.813	269.337	62.7021	267.296	47.3715
333	ENSG00000010030	ETV7	452.229	-1.17927	0.372869	-3.1627	0.00156314	0.10282	886.46	518.254	784.298	524.379	612.189	439.06	108.814	264.437	481.596	274.783	152.458	380.025
334	ENSG00000277918	RNVU1-28	37.6964	-3.47935	1.10048	-3.16166	0.00156872	0.102878	109.8	1.21942	234.103	54.6228	1.08737	14.4079	0	2.74028	0.891844	17.5197	13.8598	2.1054
335	ENSG00000108786	HSD17B1	65.553	1.2556	0.39734	3.16002	0.00157756	0.103149	61.4478	35.3632	37.7585	34.3343	38.0579	25.7825	160.973	53.4354	114.156	34.1173	89.0986	102.112
336	ENSG00000236094	LINC00545	8.56292	3.03981	0.963212	3.15591	0.00159998	0.104188	1.00734	1.21942	1.07881	0	6.52422	1.51662	34.1729	26.0326	0.891844	20.286	7.91987	2.1054
337	ENSG00000128274	A4GALT	1550.28	0.931158	0.295184	3.1545	0.00160772	0.104188	900.563	1151.13	662.392	1175.95	1167.83	1341.45	2887.61	2544.35	1581.24	1977.88	2191.83	1021.12
338	ENSG00000100336	APOL4	185.411	-2.05375	0.650982	-3.15485	0.0016058	0.104188	743.418	84.1401	375.427	166.209	304.463	119.813	11.6907	26.0326	74.9149	201.016	34.6495	83.1633
339	ENSG00000171631	P2RY6	258.796	-1.95939	0.621344	-3.15347	0.00161339	0.104247	1455.61	117.064	397.004	149.823	126.135	224.459	167.268	169.897	87.4007	90.3648	41.5793	78.9525
340	ENSG00000107485	GATA3	64.3687	-1.52703	0.484414	-3.15233	0.00161976	0.104351	133.976	37.8021	210.369	87.3965	58.7179	45.4985	14.3886	23.2923	37.4575	57.1696	32.6695	33.6864
341	ENSG00000197083	ZNF300P1	34.9218	-2.76701	0.879633	-3.14564	0.00165723	0.106452	4.02936	124.381	8.63051	213.029	10.8737	4.54985	5.39573	5.48055	9.81028	15.6755	10.8898	6.3162
342	ENSG00000233680	HNRNPA1P27	6.73542	2.61795	0.832717	3.14386	0.00166733	0.106787	3.02202	1.21942	2.15763	1.56065	1.08737	2.27492	35.9715	5.48055	9.81028	11.9872	0.989984	5.2635
343	ENSG00000153898	MCOLN2	70.6137	-1.50362	0.478772	-3.14058	0.00168613	0.107676	240.754	53.6545	93.8568	116.269	67.4169	54.5982	19.7843	28.7729	60.6454	36.8836	16.8297	57.8985
344	ENSG00000130508	PXDN	897.672	1.69218	0.53951	3.13651	0.00170971	0.108865	374.731	278.028	337.669	645.33	563.257	346.547	2281.49	1285.19	335.333	3365.63	500.932	457.925
345	ENSG00000215244	LINC02649	75.7135	1.80513	0.576204	3.1328	0.00173149	0.109932	33.2423	39.0215	34.5221	27.3114	35.8832	31.8489	91.7274	397.34	66.8883	18.4418	71.2789	61.0566
346	ENSG00000012504	NR1H4	1919.12	1.22755	0.392242	3.12958	0.00175055	0.110821	1006.33	1836.45	946.12	854.457	1290.71	957.743	4304.89	4842.07	1505.43	1100.05	2266.07	2119.09
347	ENSG00000136490	LIMD2	735.217	-1.66655	0.532681	-3.1286	0.0017564	0.110871	2043.89	295.1	2150.08	1201.7	574.131	444.368	154.678	275.398	503	438.915	162.357	578.985
348	ENSG00000226979	LTA	58.5342	-1.71944	0.550158	-3.12535	0.00177591	0.11146	154.123	41.4603	165.059	81.9342	65.2422	31.0906	5.39573	20.5521	47.2677	23.0523	18.8097	48.4242
349	ENSG00000166145	SPINT1	1564.45	0.896304	0.286782	3.12538	0.00177573	0.11146	865.306	1310.88	1263.29	925.467	881.856	1314.91	1741.02	1522.22	3247.2	1624.72	2735.33	1341.14
350	ENSG00000182551	ADI1	4912.24	1.10852	0.354976	3.12279	0.00179146	0.112094	2587.86	4942.31	2649.57	2540.74	3510.03	2446.3	3288.7	10509	8411.87	9444.05	4601.45	4015
351	ENSG00000251493	FOXD1	77.9566	2.86723	0.918641	3.12117	0.00180137	0.112094	8.05873	36.5826	10.7881	21.0688	25.0095	11.3746	3.59715	353.496	4.45922	408.486	17.8197	34.7391
352	ENSG00000111537	IFNG	118.092	-2.95958	0.948226	-3.12118	0.00180128	0.112094	502.663	57.3128	478.993	104.564	85.9022	25.7825	0	67.1368	7.13475	42.4161	0.989984	44.2134
353	ENSG00000183347	GBP6	5.37863	-2.58471	0.828921	-3.11816	0.00181987	0.112925	16.1175	6.09711	11.867	14.8262	5.43685	0.758308	0.899288	2.74028	1.78369	0.92209	0.989984	2.1054
354	ENSG00000274372	LINC02804	31.414	1.36952	0.439855	3.11358	0.00184831	0.113211	20.1468	10.9748	12.9458	22.6295	21.7474	16.6828	17.9858	17.8118	71.3475	65.4684	45.5393	53.6877
355	ENSG00000116785	CFHR3	17.925	6.66748	2.14164	3.11326	0.00185033	0.113211	1.00734	0	1.07881	0	0	0	0.899288	149.345	0	61.78	0.989984	0
356	ENSG00000138722	MMRN1	85.8575	1.76546	0.56706	3.11335	0.00184977	0.113211	65.4772	32.9244	61.4924	23.4098	18.4853	32.6072	94.4252	71.2472	24.9716	198.249	338.575	68.4255
357	ENSG00000173156	RHOD	257.215	0.838994	0.269279	3.1157	0.00183509	0.113211	161.175	115.845	190.95	244.242	152.232	241.142	458.637	301.43	387.06	243.432	317.785	272.649
358	ENSG00000262995		464.313	2.33011	0.748123	3.1146	0.00184192	0.113211	35.2569	154.866	49.6255	31.9934	616.538	36.3988	240.11	2130.56	625.183	649.151	666.259	335.811
359	ENSG00000242516	LINC00960	43.8382	3.74053	1.20203	3.11186	0.00185914	0.113434	13.0954	2.43884	18.3398	0	2.17474	0.758308	0	5.48055	222.069	23.0523	4.94992	233.699
360	ENSG00000135426	TESPA1	100.836	-1.44593	0.464866	-3.11042	0.00186824	0.113672	200.461	70.7264	222.236	199.763	134.834	57.6314	34.1729	27.4028	88.2926	80.2218	23.7596	70.5309
361	ENSG00000049167	ERCC8	215.174	-0.733309	0.236118	-3.10569	0.00189833	0.114658	266.945	251.201	278.334	188.839	280.541	345.03	124.102	211.001	123.966	146.612	179.187	186.328
362	ENSG00000154127	UBASH3B	102.072	-1.28883	0.415027	-3.10541	0.00190015	0.114658	194.417	57.3128	250.285	123.291	132.659	111.471	82.7345	46.5847	38.3493	89.4427	26.7296	71.5836
363	ENSG00000185482	STAC3	56.776	-1.09901	0.353813	-3.10619	0.00189518	0.114658	122.896	49.9963	111.118	77.2523	66.3295	37.1571	26.9786	34.2534	42.8085	46.1045	31.6795	34.7391
364	ENSG00000165178	NCF1C	102.932	-1.19235	0.384338	-3.10235	0.00191992	0.11531	229.674	91.4566	173.689	169.331	139.183	56.1148	33.2737	45.2146	77.5904	58.0917	75.2388	86.3214
365	ENSG00000259370		83.8741	1.59702	0.514816	3.10211	0.00192148	0.11531	22.1615	79.2624	26.9704	42.9179	64.1548	15.1662	159.174	202.78	180.153	91.2869	27.7196	94.743
366	ENSG00000110330	BIRC2	2432.74	0.783214	0.252607	3.10053	0.00193175	0.115609	2247.38	2060.82	1636.56	1597.33	1465.77	1721.36	5018.03	3296.55	2742.42	2157.69	2556.14	2692.81
367	ENSG00000250222	TRIM7-AS2	774.038	1.65994	0.536171	3.09591	0.00196209	0.117064	196.431	578.006	434.762	515.795	310.988	197.16	2013.51	497.36	1119.26	238.821	584.091	2602.27
368	ENSG00000225885		8.55771	-2.60057	0.840193	-3.09521	0.00196674	0.117064	24.1762	12.1942	23.7339	4.68196	13.0484	10.6163	7.1943	0	1.78369	0	0	5.2635
369	ENSG00000186715	MST1L	100.548	2.90783	0.940275	3.09253	0.00198458	0.117805	36.2643	14.6331	7.5517	42.1376	41.32	0	358.816	5.48055	177.477	140.158	6.92989	375.814
370	ENSG00000162676	GFI1	49.7003	-1.53267	0.495961	-3.0903	0.00199956	0.118374	87.6387	43.8992	163.98	67.8884	50.019	30.3323	27.8779	9.59097	12.4858	45.1824	22.7696	34.7391
371	ENSG00000122877	EGR2	121.929	-1.59233	0.51582	-3.08698	0.00202202	0.119381	93.6827	337.78	249.206	78.8129	188.115	150.903	16.1872	87.6888	27.6472	107.885	33.6595	91.5849
372	ENSG00000199407	RNA5SP301	16.0928	1.9827	0.64291	3.08395	0.00204273	0.120279	2.01468	9.75537	2.15763	8.58359	6.52422	9.858	46.763	5.48055	22.2961	8.29881	19.7997	51.5823
373	ENSG00000139679	LPAR6	1724.14	-0.863204	0.280014	-3.08272	0.0020512	0.120455	2637.22	1616.95	2972.13	1938.33	1681.07	2503.93	735.618	1504.41	1510.78	1191.34	850.397	1547.47
374	ENSG00000011600	TYROBP	18228.9	-1.34699	0.437401	-3.07954	0.00207323	0.121423	44505.3	12325.9	50319.1	11956.2	23930.8	13983.2	5545.91	12512.1	8295.04	12445.5	7753.56	15174.7
375	ENSG00000167701	GPT	490.419	1.96903	0.640165	3.07581	0.00209929	0.12197	63.4625	271.931	75.517	120.951	436.035	229.767	94.4252	609.711	1754.26	1157.22	879.106	192.644
376	ENSG00000005844	ITGAL	529.649	-1.43225	0.465419	-3.07733	0.00208861	0.12197	1630.89	287.783	1001.14	922.345	488.229	307.115	161.872	235.664	353.17	417.707	160.377	389.499
377	ENSG00000161610	HCRT	152.004	1.72594	0.561064	3.07619	0.00209661	0.12197	104.763	42.6797	64.7288	99.8817	22.8348	87.9637	107.915	357.606	528.864	211.159	35.6394	160.01
378	ENSG00000259905	PWRN1	4.59037	5.17532	1.68381	3.07357	0.00211511	0.122564	1.00734	0	0	0	0	0	35.0722	1.37014	0	1.84418	0	15.7905
379	ENSG00000269976		107.903	2.17063	0.708232	3.06486	0.00217769	0.125242	9.06607	46.338	15.1034	66.3277	64.1548	34.1239	180.757	383.639	67.7801	39.6499	374.214	13.6851
380	ENSG00000260552	COSMOC	175.152	1.37139	0.447405	3.0652	0.00217522	0.125242	38.279	206.082	153.192	49.9409	59.8053	79.6223	294.966	304.171	368.332	208.392	214.827	124.219
381	ENSG00000267396		27.0653	1.67807	0.547537	3.06476	0.00217847	0.125242	10.0734	31.7049	9.70933	11.7049	7.61158	6.82477	13.4893	93.1694	24.9716	34.1173	27.7196	53.6877
382	ENSG00000285373	LINC02478	158.61	2.17052	0.708896	3.06183	0.0021999	0.126143	16.1175	9.75537	181.241	102.223	22.8348	13.6495	392.09	343.905	68.672	110.651	182.157	460.03
383	ENSG00000156222	SLC28A1	4143.22	0.873322	0.285401	3.05998	0.00221349	0.126351	1937.12	3158.3	2424.1	3624.61	2768.44	3643.67	8053.12	4759.86	4727.67	3284.49	4209.41	7127.83
384	ENSG00000100344	PNPLA3	22.2004	1.79094	0.58532	3.05977	0.00221507	0.126351	10.0734	10.9748	5.39407	3.90163	23.9221	6.06646	44.0651	27.4028	43.7004	46.1045	40.5894	4.2108
385	ENSG00000157890	MEGF11	143.785	2.63834	0.86336	3.0559	0.00224385	0.12766	101.741	3.65826	46.389	8.58359	71.7664	6.82477	455.939	408.301	24.0798	410.33	9.89984	177.906
386	ENSG00000161929	SCIMP	280.457	-1.42499	0.466523	-3.0545	0.00225435	0.127925	847.174	189.01	721.727	213.809	288.153	191.852	80.9359	223.332	143.587	105.118	137.608	223.172
387	ENSG00000043462	LCP2	785.483	-1.21528	0.398094	-3.05276	0.0022675	0.128009	1857.54	490.207	1776.81	967.604	977.545	518.683	278.779	454.886	422.734	746.893	376.194	557.931
388	ENSG00000027075	PRKCH	428.262	-0.805102	0.263711	-3.05297	0.00226586	0.128009	639.662	488.988	638.658	522.038	580.655	398.87	214.93	276.768	218.502	487.786	321.745	350.549
389	ENSG00000254416	LINC02732	145.279	2.37056	0.776884	3.05137	0.002278	0.128271	10.0734	81.7012	6.47288	7.02293	143.533	34.1239	17.9858	430.223	371.899	198.249	316.795	125.271
390	ENSG00000236740		34.3858	2.92041	0.957564	3.04983	0.00228967	0.128597	13.0954	31.7049	0	3.1213	0	0.758308	146.584	82.2083	27.6472	52.5591	46.5293	8.4216
391	ENSG00000241764	CBLL1-AS1	180.187	1.14192	0.37452	3.04902	0.00229588	0.128616	98.7194	153.647	104.645	91.2981	90.2516	135.737	280.578	348.015	415.599	149.379	89.0986	205.277
392	ENSG00000269985	FARS2-AS1	699.531	1.30731	0.429424	3.04433	0.00233198	0.130305	306.232	368.265	709.86	265.311	612.189	154.695	1012.6	896.07	585.942	457.357	1672.08	1353.77
393	ENSG00000102879	CORO1A	1004.03	-1.41672	0.465612	-3.04271	0.0023446	0.130677	2560.66	623.124	2849.15	1122.11	957.972	652.145	199.642	604.231	727.745	639.931	382.134	729.521
394	ENSG00000281103	TRG-AS1	270.979	-1.76545	0.580501	-3.04126	0.00235591	0.130974	550.008	184.133	1137.07	239.56	144.62	257.066	43.1658	139.754	43.7004	201.938	80.1887	230.541
395	ENSG00000128340	RAC2	1506.95	-1.3736	0.45184	-3.04003	0.00236558	0.131179	4120.02	936.515	4127.54	1551.29	1537.54	774.991	809.359	942.655	766.986	1031.82	425.693	1059.02
396	ENSG00000133710	SPINK5	60.8708	-2.75358	0.906271	-3.03836	0.0023787	0.131375	341.489	256.078	17.261	6.24261	11.9611	3.03323	10.7915	20.5521	10.7021	11.9872	27.7196	12.6324
397	ENSG00000247287	PRKCH-AS1	35.6139	-1.30127	0.428432	-3.0373	0.0023871	0.131375	47.345	41.4603	113.275	43.6983	31.5337	27.2991	25.1801	16.4417	25.8635	27.6627	12.8698	14.7378
398	ENSG00000101076	HNF4A	1764.23	1.2412	0.408574	3.03788	0.00238246	0.131375	1319.62	1046.26	812.347	873.185	1174.36	1067.7	2198.76	3456.86	3001.95	4414.97	1088.98	715.836
399	ENSG00000265485	LINC01915	3.38679	-3.07474	1.0135	-3.03379	0.00241505	0.132579	9.06607	7.31653	4.31526	4.68196	4.34948	6.06646	0	2.74028	0	0	0	2.1054
400	ENSG00000149506	ZP1	50.0657	3.09999	1.02218	3.03272	0.00242363	0.132718	32.2349	3.65826	12.9458	0.780326	3.26211	9.858	116.907	243.885	5.35106	167.82	1.97997	2.1054
401	ENSG00000139269	INHBE	56.7253	3.44622	1.13786	3.02868	0.00245621	0.133501	0	40.2409	3.23644	0	6.52422	7.58308	9.89217	334.314	108.805	16.5976	152.458	1.0527
402	ENSG00000134905	CARS2	767.721	0.877437	0.289681	3.02897	0.00245387	0.133501	412.002	435.333	480.072	542.327	514.326	862.196	714.035	967.317	1056.84	1449.53	1169.17	609.513
403	ENSG00000259405	ISCA1P4	5.72666	4.97478	1.64189	3.02992	0.00244621	0.133501	0	2.43884	0	0	0	0	11.6907	47.9548	2.67553	0	3.95994	0
404	ENSG00000257599	OVCH1-AS1	15.2887	-2.09839	0.693112	-3.0275	0.0024659	0.133696	70.5139	14.6331	11.867	25.7508	14.1358	12.1329	17.9858	2.74028	1.78369	3.68836	2.96995	5.2635
405	ENSG00000225398	PGM5P4	16.5823	-2.68582	0.888303	-3.02353	0.0024984	0.133854	16.1175	103.651	6.47288	28.0917	8.69895	9.0997	0	6.85069	8.0266	4.61045	0	7.3689
406	ENSG00000106462	EZH2	205.637	-0.915679	0.302844	-3.0236	0.0024979	0.133854	423.083	152.428	281.57	279.357	163.105	313.181	153.778	101.39	142.695	128.171	142.558	186.328
407	ENSG00000276070	CCL4L2	769.051	-1.55301	0.513567	-3.02396	0.0024949	0.133854	979.135	756.041	3100.51	841.972	813.352	391.287	197.843	660.406	137.344	362.381	417.773	570.563
408	ENSG00000275395	FCGBP	264.536	1.63573	0.54102	3.02342	0.00249938	0.133854	78.5726	176.816	134.852	193.521	113.086	75.8308	179.858	831.674	102.562	745.049	108.898	433.712
409	ENSG00000130203	APOE	419.319	-1.615	0.533928	-3.02475	0.00248842	0.133854	516.766	162.183	1042.13	458.832	1374.43	239.625	309.355	102.76	334.442	106.962	114.838	269.491
410	ENSG00000143494	VASH2	11.4195	2.05533	0.67998	3.02263	0.00250586	0.133874	3.02202	2.43884	2.15763	3.90163	13.0484	2.27492	8.99288	15.0715	30.3227	39.6499	10.8898	5.2635
411	ENSG00000149243	KLHL35	35.1278	3.33026	1.10216	3.02159	0.00251454	0.134011	7.05139	8.53595	4.31526	3.1213	7.61158	7.58308	45.8637	1.37014	0.891844	329.186	4.94992	1.0527
412	ENSG00000275896	PRSS2	15.366	-3.31003	1.09573	-3.02084	0.00252078	0.134017	95.6974	35.3632	6.47288	27.3114	2.17474	0.758308	0	0	5.35106	9.2209	0.989984	1.0527
413	ENSG00000168389	MFSD2A	145.644	2.13982	0.708595	3.01981	0.00252936	0.134148	90.6607	32.9244	98.1721	24.1901	50.019	27.2991	71.943	667.257	50.8351	94.0532	509.842	30.5283
414	ENSG00000233491		7.00179	3.47498	1.15217	3.01603	0.00256108	0.135502	5.0367	1.21942	0	0.780326	0	0	5.39573	8.22083	38.3493	16.5976	0	8.4216
415	ENSG00000183778	B3GALT5	65.9355	3.11751	1.03417	3.01449	0.00257411	0.135863	45.3303	12.1942	2.15763	0	5.43685	16.6828	500.004	67.1368	24.9716	105.118	6.92989	5.2635
416	ENSG00000170956	CEACAM3	6.09332	-2.08948	0.694359	-3.00922	0.00261918	0.13791	3.02202	12.1942	10.7881	14.0459	16.3105	3.03323	2.69786	1.37014	2.67553	1.84418	1.97997	3.1581
417	ENSG00000129204	USP6	6.51931	-4.6565	1.54812	-3.00784	0.00263115	0.138208	0	4.87768	6.47288	0.780326	0	62.9396	0.899288	1.37014	0.891844	0	0	0
418	ENSG00000115641	FHL2	1778.84	2.44465	0.813337	3.00571	0.00264962	0.138792	962.011	598.736	464.969	73.3506	278.367	934.994	2059.37	9545.75	202.449	2406.66	3735.21	84.216
419	ENSG00000124875	CXCL6	70.0053	4.72615	1.57303	3.00449	0.00266026	0.138792	23.1688	4.87768	1.07881	0	0	1.51662	3.59715	491.88	161.424	134.625	0	17.8959
420	ENSG00000172349	IL16	543.064	-1.2572	0.418455	-3.00437	0.00266127	0.138792	1105.05	357.29	1460.71	599.29	626.325	445.885	138.49	346.645	378.142	462.889	196.017	400.026
421	ENSG00000251292	ERVH-1	16.4215	3.49145	1.164	2.99953	0.00270394	0.139598	0	7.31653	1.07881	2.34098	3.26211	2.27492	29.6765	0	6.24291	0	122.758	22.1067
422	ENSG00000251169	LINC01843	172.824	1.68719	0.56275	2.99811	0.00271657	0.139598	45.3303	109.748	84.1475	70.2293	126.135	56.1148	71.943	252.105	161.424	50.715	720.709	325.284
423	ENSG00000204257	HLA-DMA	3413.77	-1.02812	0.342538	-3.00147	0.0026868	0.139598	5433.6	3769.23	6026.26	3211.82	5341.16	3705.85	1131.3	1170.1	2346.44	3224.55	3517.41	2087.5
424	ENSG00000165084	C8orf34	19.1405	-3.99146	1.33156	-2.99758	0.00272135	0.139598	1.00734	28.0467	0	20.2885	0	166.828	3.59715	0	2.67553	0	1.97997	5.2635
425	ENSG00000258586	LINC02274	860.135	1.54467	0.515244	2.99795	0.00271804	0.139598	327.386	904.81	127.3	163.868	521.937	589.964	1173.57	1450.98	813.362	1173.82	2630.39	444.239
426	ENSG00000200156	RNU5B-1	39.9093	-1.99774	0.665929	-2.99993	0.00270044	0.139598	32.2349	91.4566	171.531	37.4556	39.1453	11.3746	5.39573	13.7014	5.35106	42.4161	9.89984	18.9486
427	ENSG00000130270	ATP8B3	431.108	2.64394	0.881479	2.99944	0.00270479	0.139598	260.901	52.4351	147.798	52.2818	39.1453	160.761	150.181	2475.84	65.9965	1657.92	74.2488	35.7918
428	ENSG00000256948		80.7793	-2.25311	0.752174	-2.99547	0.00274026	0.140033	189.38	48.7768	199.581	74.9113	242.483	46.2568	20.6836	6.85069	24.9716	0	38.6094	76.8471
429	ENSG00000111679	PTPN6	1255.16	-0.985933	0.329171	-2.9952	0.00274262	0.140033	1963.31	1004.8	3125.32	1522.42	1277.66	1115.47	957.742	782.349	967.651	974.649	483.112	887.426
430	ENSG00000284703		5.9061	4.64435	1.55117	2.99409	0.00275267	0.14022	0	0	0	1.56065	0	0.758308	35.9715	1.37014	0	24.8964	0	6.3162
431	ENSG00000165891	E2F7	11.7125	-1.63612	0.546622	-2.99315	0.00276113	0.140324	31.2276	9.75537	7.5517	14.0459	11.9611	31.8489	7.1943	2.74028	6.24291	4.61045	4.94992	8.4216
432	ENSG00000167705	RILP	509.456	0.879701	0.294074	2.99143	0.00277678	0.140793	303.21	356.071	502.727	358.17	386.016	247.208	503.601	576.828	553.835	985.714	930.585	409.5
433	ENSG00000136929	HEMGN	6.77746	-3.67875	1.23118	-2.98798	0.00280828	0.142062	48.3524	3.65826	3.23644	19.5081	0	0.758308	1.79858	0	0	0.92209	0.989984	2.1054
434	ENSG00000235033	DAAM2-AS1	97.1922	2.68356	0.898475	2.98679	0.00281921	0.142286	80.5873	17.0719	23.7339	11.7049	4.34948	19.716	37.7701	93.1694	81.1578	770.867	18.8097	7.3689
435	ENSG00000069424	KCNAB2	711.151	-0.908461	0.304301	-2.98541	0.00283203	0.142604	1124.19	719.458	1515.73	704.634	994.943	509.583	437.953	376.788	480.704	690.646	412.823	566.353
436	ENSG00000117091	CD48	1127.34	-1.40423	0.470604	-2.98389	0.00284613	0.142985	2479.07	880.422	3680.91	747.552	1311.37	718.876	254.499	750.836	498.541	631.632	573.201	1001.12
437	ENSG00000086506	HBQ1	3.60117	-4.76811	1.5987	-2.9825	0.00285907	0.143307	29.2129	0	5.39407	4.68196	0	3.03323	0	0	0.891844	0	0	0
438	ENSG00000272931	LRRC8D-DT	14.1098	-1.65711	0.556065	-2.98006	0.00288192	0.143531	30.2202	12.1942	16.1822	46.0392	11.9611	12.1329	7.1943	2.74028	10.7021	6.45463	2.96995	10.527
439	ENSG00000176049	JAKMIP2	15.8555	-2.2973	0.77083	-2.9803	0.00287964	0.143531	91.668	8.53595	28.0492	16.3868	11.9611	1.51662	6.29502	4.11041	3.56738	3.68836	3.95994	10.527
440	ENSG00000237422		44.0426	-1.9394	0.650824	-2.97992	0.0028832	0.143531	59.4331	34.1438	209.29	60.8654	22.8348	31.8489	3.59715	43.8444	7.13475	19.3639	10.8898	25.2648
441	ENSG00000255494	LINC00681	4.45742	4.63843	1.55803	2.97711	0.00290983	0.143551	0	0	0	1.56065	0	0	15.2879	1.37014	0.891844	32.2732	0	2.1054
442	ENSG00000167632	TRAPPC9	701.413	1.01176	0.339781	2.97768	0.00290443	0.143551	751.476	312.172	431.526	436.202	514.326	345.03	732.02	861.817	1653.48	1187.65	571.221	620.04
443	ENSG00000259479	SORD2P	15.9361	-2.84018	0.954002	-2.97712	0.0029097	0.143551	51.3744	12.1942	79.8322	19.5081	1.08737	3.79154	0	1.37014	1.78369	1.84418	7.91987	10.527
444	ENSG00000197272	IL27	9.02473	-2.86296	0.961323	-2.97815	0.00289998	0.143551	52.3817	2.43884	20.4975	9.36391	2.17474	8.34139	0	1.37014	0	4.61045	3.95994	3.1581
445	ENSG00000127152	BCL11B	118.764	-1.22195	0.410601	-2.97601	0.00292026	0.143586	236.725	87.7983	290.201	179.475	133.746	69.7643	39.5687	65.7666	73.1312	120.794	53.4592	74.7417
446	ENSG00000196961	AP2A1	1667.3	0.790647	0.265705	2.97566	0.00292363	0.143586	1035.55	1145.04	1357.15	1101.04	1131.95	1558.32	2125.02	2264.84	3055.46	2558.8	1436.47	1237.98
447	ENSG00000082512	TRAF5	305.57	-1.15323	0.387729	-2.97432	0.00293637	0.143889	702.117	146.331	592.269	536.864	255.532	295.74	170.865	254.846	135.56	234.211	143.548	198.96
448	ENSG00000253574		1902.35	1.93941	0.652404	2.97272	0.00295176	0.14432	674.918	638.977	1408.93	234.878	1442.94	320.764	95.3245	4037.8	3999.92	2948.84	4932.1	2092.77
449	ENSG00000155657	TTN	65.0894	-1.55683	0.523955	-2.9713	0.00296544	0.144559	103.756	24.3884	161.822	158.406	84.8148	50.0483	47.6623	17.8118	21.4043	59.0138	10.8898	41.0553
450	ENSG00000204758	RPL26L1-AS1	24.3592	1.28695	0.433195	2.97084	0.00296985	0.144559	14.1028	13.4136	17.261	17.1672	14.1358	9.0997	75.5402	31.5132	19.6206	19.3639	32.6695	28.4229
451	ENSG00000249020	SNORA58	41.3182	1.26397	0.42566	2.96945	0.00298337	0.144575	35.2569	30.4855	29.128	21.0688	21.7474	9.0997	87.2309	27.4028	86.5089	70.0789	34.6495	43.1607
452	ENSG00000108479	GALK1	818.386	1.13801	0.383193	2.96982	0.00297973	0.144575	484.531	451.186	550.195	583.684	461.045	537.64	880.403	743.985	1133.53	2062.72	1611.69	320.021
453	ENSG00000187193	MT1X	1021.28	2.69867	0.909176	2.96826	0.00299491	0.144814	719.241	284.125	366.797	60.0851	93.5138	112.23	353.42	3070.48	105.238	6591.1	445.493	53.6877
454	ENSG00000100053	CRYBB3	95.9077	2.33565	0.787146	2.96724	0.00300489	0.144976	17.1248	46.338	2.15763	37.4556	47.8442	39.432	517.99	26.0326	30.3227	37.8057	299.965	48.4242
455	ENSG00000128710	HOXD10	133.288	1.48405	0.500369	2.96592	0.00301783	0.145281	23.1688	39.0215	133.773	52.2818	105.475	67.4894	215.829	324.723	97.211	288.614	195.027	56.8458
456	ENSG00000223865	HLA-DPB1	36508.8	-1.51745	0.512105	-2.96317	0.00304493	0.146264	64636	36830.2	133993	26000.5	36611.7	26618.9	3441.58	20697.3	20050.4	21771.5	18188	29266.1
457	ENSG00000273768	RNVU1-29	12.2875	-2.24583	0.758738	-2.95996	0.00307681	0.146469	18.1321	47.5574	29.128	12.4852	8.69895	6.06646	3.59715	1.37014	0	11.0651	1.97997	7.3689
458	ENSG00000105852	PON3	119.55	-2.94647	0.994863	-2.96168	0.00305966	0.146469	179.307	835.303	171.531	53.0622	17.3979	13.6495	1.79858	4.11041	116.832	9.2209	3.95994	28.4229
459	ENSG00000133742	CA1	155.367	-5.10886	1.72594	-2.96004	0.003076	0.146469	1180.6	1.21942	182.32	447.127	0	0.758308	43.1658	1.37014	0	2.76627	2.96995	2.1054
460	ENSG00000173762	CD7	165.944	-1.32038	0.44617	-2.95938	0.00308264	0.146469	343.503	79.2624	422.895	270.773	222.911	82.6556	68.3459	79.468	72.2394	131.859	74.2488	143.167
461	ENSG00000167363	FN3K	104.667	1.03257	0.348817	2.9602	0.00307442	0.146469	44.323	130.478	52.8619	65.5474	56.5432	62.9396	130.397	197.3	99.8865	83.9102	196.017	135.798
462	ENSG00000135094	SDS	417.334	-1.25535	0.425031	-2.95355	0.00314142	0.14867	756.513	329.244	1039.98	350.366	724.188	329.864	304.859	119.202	258.635	106.04	338.575	350.549
463	ENSG00000205045	SLFN12L	51.7367	-1.62022	0.548589	-2.95344	0.00314255	0.14867	138.006	25.6078	139.167	106.124	23.9221	35.6405	11.6907	20.5521	21.4043	46.1045	16.8297	35.7918
464	ENSG00000164920	OSR2	11.4992	-2.3282	0.788767	-2.95169	0.00316036	0.148813	6.04405	4.87768	67.9653	13.2655	9.78632	12.8912	0.899288	5.48055	2.67553	0.92209	7.91987	5.2635
465	ENSG00000129038	LOXL1	45.0482	2.18111	0.739073	2.95115	0.00316595	0.148813	7.05139	2.43884	8.63051	11.7049	14.1358	53.0816	164.57	19.1819	42.8085	155.833	48.5092	12.6324
466	ENSG00000167083	GNGT2	172.349	-0.879057	0.297782	-2.95202	0.00315705	0.148813	313.283	210.96	346.299	147.482	178.329	143.32	93.526	142.494	105.238	113.417	130.678	143.167
467	ENSG00000143217	NECTIN4	10.9418	4.53318	1.53689	2.94959	0.003182	0.149171	0	2.43884	3.23644	0	0	0	98.9217	2.74028	7.13475	0	16.8297	0
468	ENSG00000123561	SERPINA7	4.75987	3.50163	1.18736	2.94908	0.00318717	0.149171	0	0	0	2.34098	2.17474	0	7.1943	4.11041	0	16.5976	8.90986	15.7905
469	ENSG00000250548	LINC01303	119.736	2.03342	0.690222	2.94603	0.00321877	0.150328	68.4992	106.09	43.1526	10.1442	43.4948	11.3746	195.146	324.723	140.02	430.616	26.7296	36.8445
470	ENSG00000169245	CXCL10	2472.6	-1.82829	0.620767	-2.94522	0.0032273	0.150406	2600.95	1166.99	11614.5	2712.41	3807.97	1248.93	358.816	696.03	918.599	971.883	494.992	3079.15
471	ENSG00000112486	CCR6	4.09605	3.29536	1.11922	2.94432	0.00323661	0.150519	0	1.21942	0	2.34098	0	0.758308	0	10.9611	11.594	9.2209	9.89984	3.1581
472	ENSG00000165507	DEPP1	7268.75	0.997862	0.339019	2.94338	0.00324646	0.150658	4031.38	4119.2	4404.8	6087.32	5462.94	4998.01	6690.7	5729.92	5049.62	18171.6	12476.8	10002.8
473	ENSG00000066294	CD84	328.223	-1.16084	0.39485	-2.93996	0.00328255	0.150789	652.757	196.327	755.17	422.156	489.316	206.26	163.67	153.455	197.098	354.083	150.478	197.908
474	ENSG00000187627	RGPD1	6.66299	-2.71437	0.923186	-2.94021	0.00327985	0.150789	12.0881	12.1942	36.6797	3.1213	1.08737	4.54985	1.79858	0	1.78369	4.61045	0.989984	1.0527
475	ENSG00000163823	CCR1	211.707	-1.38111	0.470183	-2.93738	0.00330994	0.150789	417.039	117.064	678.574	195.862	254.444	172.894	175.361	104.13	45.484	147.534	75.2388	156.852
476	ENSG00000250412	KLHL2P1	26.1064	2.22115	0.755815	2.93875	0.00329543	0.150789	17.1248	8.53595	19.4187	3.1213	1.08737	6.06646	44.0651	132.903	32.1064	9.2209	5.93991	33.6864
477	ENSG00000135549	PKIB	322.555	-1.23801	0.421574	-2.93664	0.00331787	0.150789	641.676	180.474	894.337	384.701	407.763	209.293	96.2238	179.488	169.45	193.639	284.126	229.489
478	ENSG00000091136	LAMB1	751.897	0.898728	0.306042	2.93662	0.00331814	0.150789	412.002	440.211	709.86	657.815	498.015	432.236	1410.98	824.823	654.614	1554.64	729.618	697.94
479	ENSG00000223756	TSSC2	119.963	1.9691	0.669722	2.94017	0.00328033	0.150789	122.896	13.4136	61.4924	22.6295	61.98	10.6163	310.254	401.45	229.204	116.183	50.4892	38.9499
480	ENSG00000174718	RESF1	850.765	-0.699341	0.23791	-2.93952	0.00328717	0.150789	1201.76	969.44	1351.75	1093.24	978.632	724.942	780.582	413.782	666.208	800.374	582.111	646.358
481	ENSG00000185624	P4HB	20609	0.867598	0.295374	2.93728	0.00331105	0.150789	16373.3	19588.8	10410.6	12082.6	16172.4	12927.6	39850.2	27154.8	26121.2	33451.6	19288.9	13886.2
482	ENSG00000022556	NLRP2	18.2166	-2.38465	0.811309	-2.93926	0.00328997	0.150789	23.1688	10.9748	73.3594	3.1213	59.8053	12.8912	2.69786	9.59097	2.67553	6.45463	13.8598	0
483	ENSG00000137857	DUOX1	50.3384	2.47827	0.844259	2.93543	0.00333081	0.150808	32.2349	3.65826	8.63051	17.9475	19.5726	9.858	6.29502	2.74028	320.172	85.7544	27.7196	69.4782
484	ENSG00000226496	LINC00323	7.41332	2.76856	0.943197	2.93529	0.00333232	0.150808	2.01468	0	2.15763	0.780326	0	6.06646	9.89217	1.37014	25.8635	15.6755	1.97997	23.1594
485	ENSG00000116852	KIF21B	86.6894	-1.0856	0.369999	-2.93407	0.00334544	0.15109	160.167	69.507	206.053	106.124	83.7274	81.139	49.4608	73.9874	32.1064	83.9102	43.5593	50.5296
486	ENSG00000145506	NKD2	183.678	2.16775	0.73905	2.93315	0.0033554	0.151228	80.5873	31.7049	144.561	104.564	16.3105	23.5075	1031.48	300.06	56.1862	293.225	52.4692	69.4782
487	ENSG00000187862	TTC24	20.8488	-2.52405	0.862936	-2.92496	0.00344503	0.154809	24.1762	14.6331	103.566	48.3802	4.34948	18.1994	0	1.37014	7.13475	14.7534	0.989984	12.6324
488	ENSG00000265206	MIR142HG	215.011	-1.54062	0.526781	-2.9246	0.00344899	0.154809	702.117	119.503	495.176	358.95	84.8148	159.245	53.9573	128.793	133.777	84.8323	66.329	192.644
489	ENSG00000183780	SLC35F3	39.6896	2.07458	0.710146	2.92134	0.0034853	0.156119	30.2202	2.43884	18.3398	3.90163	22.8348	13.6495	24.2808	121.942	53.5106	138.314	41.5793	5.2635
490	ENSG00000164855	TMEM184A	150.939	1.19851	0.410542	2.91934	0.00350769	0.156801	79.5799	114.626	75.517	99.8817	66.3295	113.746	374.104	191.819	144.479	231.445	270.266	49.4769
491	ENSG00000162894	FCMR	207.281	-1.40852	0.482855	-2.91707	0.0035334	0.157629	282.055	137.795	791.85	183.377	243.571	168.344	54.8566	75.3576	107.021	139.236	88.1086	215.804
492	ENSG00000159753	CARMIL2	57.54	-1.43593	0.492457	-2.91585	0.00354718	0.157922	121.888	37.8021	158.586	95.9801	34.7958	55.3565	12.59	19.1819	50.8351	41.4941	18.8097	43.1607
493	ENSG00000182600	SNORC	214.426	1.93167	0.66331	2.91217	0.00358932	0.159358	185.351	41.4603	44.2314	169.331	32.6211	60.6646	86.3317	1120.77	153.397	91.2869	378.174	209.487
494	ENSG00000255186		3.85747	-3.39987	1.16764	-2.91176	0.003594	0.159358	16.1175	2.43884	15.1034	3.90163	3.26211	1.51662	0	0	0	1.84418	0	2.1054
495	ENSG00000148123	PLPPR1	8.68247	4.65312	1.59984	2.90848	0.00363189	0.160314	0	0	0	0.780326	3.26211	0	2.69786	0	1.78369	0	85.1387	10.527
496	ENSG00000173237	C11orf86	162.733	3.98438	1.37015	2.908	0.00363751	0.160314	27.1982	67.0682	1.07881	0	14.1358	6.82477	89.9288	1044.05	1.78369	113.417	583.101	4.2108
497	ENSG00000198133	TMEM229B	133.349	-1.11442	0.383142	-2.90863	0.00363011	0.160314	330.408	85.3595	241.654	169.331	156.581	111.471	85.4324	76.7277	69.5638	135.547	46.5293	91.5849
498	ENSG00000260279		4.20757	-2.88162	0.992282	-2.90403	0.00368393	0.162034	17.1248	3.65826	7.5517	0.780326	5.43685	9.858	0	1.37014	0.891844	2.76627	0	1.0527
499	ENSG00000211799	TRAV19	14.3129	-2.82931	0.974589	-2.90308	0.00369517	0.162202	90.6607	1.21942	10.7881	12.4852	18.4853	16.6828	0	4.11041	1.78369	0	3.95994	11.5797
500	ENSG00000178562	CD28	62.0566	-1.56563	0.539443	-2.9023	0.00370433	0.162279	159.16	18.2913	174.768	86.6162	85.9022	31.8489	11.6907	34.2534	36.5656	47.9487	20.7897	36.8445
501	ENSG00000143184	XCL1	202.577	-1.16343	0.401453	-2.89805	0.00375489	0.163827	309.254	258.517	433.683	216.15	240.309	221.426	76.4395	252.105	62.4291	133.703	57.4191	169.485
502	ENSG00000253194		9.16157	-2.85078	0.983892	-2.89745	0.00376209	0.163827	14.1028	14.6331	16.1822	0	41.32	10.6163	3.59715	0	0	6.45463	1.97997	1.0527
503	ENSG00000110675	ELMOD1	19.6802	-3.84677	1.32715	-2.89851	0.00374935	0.163827	15.1101	3.65826	158.586	0	1.08737	42.4652	3.59715	2.74028	8.91844	0	0	0
504	ENSG00000171243	SOSTDC1	4.80658	-3.68359	1.27294	-2.89376	0.00380657	0.165435	14.1028	26.8273	1.07881	0	7.61158	3.79154	0	1.37014	0	1.84418	0	1.0527
505	ENSG00000258603		152.485	1.91665	0.662703	2.89218	0.00382581	0.165941	75.5506	70.7264	25.8915	24.9704	164.193	21.9909	101.62	831.674	96.3192	78.3777	190.077	148.431
506	ENSG00000281357	ARRDC3-AS1	26.1884	-1.37552	0.476012	-2.88968	0.00385629	0.166933	56.4111	42.6797	63.65	32.7737	13.0484	18.1994	14.3886	16.4417	13.3777	5.53254	18.8097	18.9486
507	ENSG00000244693	NA	37.5383	1.27382	0.44143	2.88567	0.00390584	0.168258	13.0954	8.53595	33.4432	31.213	20.66	24.2659	70.1445	50.6951	49.0514	22.1302	35.6394	91.5849
508	ENSG00000267364		72.5762	-1.40938	0.488373	-2.88587	0.00390333	0.168258	144.05	82.9206	221.157	44.4786	83.7274	56.1148	10.7915	49.325	32.1064	31.3511	47.5192	67.3728
509	ENSG00000093072	ADA2	1026.81	-1.20989	0.419324	-2.88534	0.00390995	0.168258	2705.72	545.081	1951.57	1069.05	1726.74	605.13	741.913	363.087	538.674	769.945	474.202	830.58
510	ENSG00000230092		11.5448	-1.82736	0.6338	-2.88319	0.00393675	0.168472	20.1468	20.7302	35.6009	7.02293	9.78632	15.1662	1.79858	1.37014	8.91844	1.84418	10.8898	5.2635
511	ENSG00000204287	HLA-DRA	65278.6	-1.51465	0.525154	-2.88421	0.00392402	0.168472	140644	68221.7	226438	29998.9	69737.3	45223.2	8501.87	50952.7	21926.9	35032	35165.2	51502.3
512	ENSG00000224429	LINC00539	53.666	-1.69446	0.587725	-2.88309	0.00393799	0.168472	170.241	17.0719	157.507	69.449	42.4074	34.8822	12.59	36.9937	23.1879	20.286	9.89984	49.4769
513	ENSG00000259670		27.2742	3.18093	1.10364	2.88221	0.00394894	0.168611	5.0367	10.9748	1.07881	8.58359	5.43685	1.51662	160.973	0	5.35106	0	34.6495	93.6903
514	ENSG00000171016	PYGO1	9.30847	2.77995	0.96503	2.88069	0.00396807	0.169098	1.00734	1.21942	1.07881	4.68196	2.17474	3.79154	40.468	0	2.67553	43.3382	4.94992	6.3162
515	ENSG00000270722	RNVU1-31	202.881	-1.78998	0.621865	-2.87841	0.00399688	0.169995	414.017	260.956	675.338	232.537	220.736	84.9305	20.6836	64.3965	16.945	181.652	62.369	200.013
516	ENSG00000257671	KRT7-AS	5.01858	4.80263	1.6693	2.87703	0.00401441	0.17041	2.01468	0	0	0	0	0	8.09359	0	42.8085	0	0.989984	6.3162
517	ENSG00000272154		4.95578	5.28112	1.83666	2.87539	0.00403534	0.170967	0	0	1.07881	0	0	0	35.0722	20.5521	0	2.76627	0	0
518	ENSG00000101213	PTK6	107.097	2.8118	0.978319	2.87412	0.0040516	0.171325	3.02202	12.1942	61.4924	13.2655	52.1937	18.1994	766.193	293.21	32.1064	10.143	16.8297	6.3162
519	ENSG00000274210	RNVU1-27	56.9573	-1.71624	0.597776	-2.87105	0.00409112	0.171828	85.624	85.3595	216.842	56.1835	64.1548	15.9245	4.49644	28.7729	21.4043	55.3254	17.8197	31.581
520	ENSG00000187118	CMC1	2525.56	-1.15955	0.403918	-2.87076	0.00409488	0.171828	5259.33	3602.17	5654.06	1611.37	2914.15	1893.5	908.281	2236.07	772.337	1495.63	1602.78	2357
521	ENSG00000258732		19.7434	-3.0981	1.07879	-2.87183	0.00408102	0.171828	36.2643	10.9748	144.561	10.1442	6.52422	3.03323	0	17.8118	0.891844	4.61045	0	2.1054
522	ENSG00000133519	ZDHHC8P1	13.5333	1.52374	0.530648	2.87147	0.00408572	0.171828	7.05139	1.21942	2.15763	6.24261	10.8737	13.6495	29.6765	24.6625	11.594	18.4418	16.8297	20.0013
523	ENSG00000211689	TRGC1	16.3068	-1.18766	0.413919	-2.86931	0.00411371	0.172288	11.0808	34.1438	14.0246	20.2885	29.359	27.2991	10.7915	9.59097	10.7021	10.143	10.8898	7.3689
524	ENSG00000183346	CABCOCO1	73.1829	-1.79699	0.62662	-2.86775	0.00413401	0.172479	129.947	14.6331	190.95	69.449	63.0674	213.843	30.5758	28.7729	57.9699	20.286	3.95994	54.7404
525	ENSG00000124440	HIF3A	102.489	2.13234	0.743551	2.86778	0.00413367	0.172479	18.1321	81.7012	35.6009	22.6295	56.5432	14.4079	25.1801	86.3187	43.7004	653.762	161.367	30.5283
526	ENSG00000170837	GPR27	18.9689	2.58575	0.902063	2.86648	0.00415063	0.172843	5.0367	3.65826	5.39407	0	5.43685	12.8912	44.0651	2.74028	12.4858	12.9093	118.798	4.2108
527	ENSG00000124196	GTSF1L	16.1807	-3.45492	1.20626	-2.86417	0.00418104	0.173779	48.3524	0	85.2263	35.1147	5.43685	3.79154	0	1.37014	0	6.45463	0	8.4216
528	ENSG00000133216	EPHB2	76.8481	-1.26472	0.442112	-2.86063	0.00422805	0.175069	195.424	73.1653	148.876	107.685	75.0285	51.5649	37.7701	31.5132	45.484	99.5857	28.7095	27.3702
529	ENSG00000158578	ALAS2	13.1801	-3.29156	1.15048	-2.86104	0.00422257	0.175069	67.4918	1.21942	45.3102	25.7508	0	3.79154	8.09359	2.74028	1.78369	0	1.97997	0
530	ENSG00000241106	HLA-DOB	101.227	-1.62146	0.56713	-2.85907	0.00424889	0.175599	168.226	49.9963	201.738	323.055	105.475	68.2477	8.09359	38.3639	100.778	44.2603	30.6895	75.7944
531	ENSG00000079263	SP140	148.298	-1.3974	0.488997	-2.85769	0.00426738	0.175757	480.502	86.5789	281.57	179.475	182.678	78.864	35.0722	83.5784	50.8351	88.5207	78.2088	153.694
532	ENSG00000118160	SLC8A2	7.54515	4.97316	1.74033	2.85759	0.00426874	0.175757	0	1.21942	0	0	0	1.51662	70.1445	13.7014	0	0	3.95994	0
533	ENSG00000245954	LINC02273	20.3841	-2.20258	0.771006	-2.85675	0.00427997	0.175888	32.2349	14.6331	102.487	4.68196	35.8832	10.6163	2.69786	19.1819	8.0266	10.143	2.96995	1.0527
534	ENSG00000127561	SYNGR3	5.89093	-2.85196	0.998784	-2.85544	0.00429776	0.176289	12.0881	7.31653	8.63051	11.7049	2.17474	19.716	0	4.11041	0	0	4.94992	0
535	ENSG00000224165	DNAJC27-AS1	510.613	0.992097	0.347577	2.85432	0.00431285	0.176577	359.621	345.096	352.772	381.579	347.958	263.133	1215.84	542.575	489.622	263.718	596.961	968.484
536	ENSG00000204839	MROH6	151.689	1.112	0.389901	2.852	0.00434457	0.177544	50.367	114.626	80.9111	152.164	90.2516	87.2054	227.52	254.846	269.337	302.446	82.1687	108.428
537	ENSG00000156234	CXCL13	86.9658	-1.86909	0.656354	-2.84769	0.00440381	0.179252	383.797	65.8487	79.8322	163.868	58.7179	66.7311	16.1872	73.9874	16.945	81.1439	4.94992	31.581
538	ENSG00000137101	CD72	287.472	-1.31291	0.460981	-2.84809	0.0043983	0.179252	825.012	93.8954	560.983	488.484	244.658	246.45	137.591	183.598	197.098	213.925	82.1687	175.801
539	ENSG00000185215	TNFAIP2	831.259	-0.841858	0.295682	-2.84717	0.00441093	0.179252	1168.52	691.412	1024.87	973.066	1090.63	1453.68	558.458	541.204	431.653	346.706	929.595	765.313
540	ENSG00000143119	CD53	2038.08	-1.25579	0.441298	-2.84567	0.00443182	0.179436	4823.15	1481.6	5126.52	1569.24	2739.08	1498.42	499.105	1486.6	791.958	1864.47	983.054	1593.79
541	ENSG00000168404	MLKL	549.194	-0.56824	0.199673	-2.84585	0.0044293	0.179436	536.913	631.66	669.944	720.241	630.674	746.933	451.443	323.353	404.005	545.877	386.094	543.193
542	ENSG00000203747	FCGR3A	4499.74	-1.57208	0.55324	-2.84159	0.00448894	0.180558	16538.5	2663.22	9482.78	4143.53	5157.39	2421.28	756.301	3571.95	1257.5	4736.78	1379.05	1888.54
543	ENSG00000026950	BTN3A1	1436.1	-1.01372	0.356777	-2.84133	0.00449253	0.180558	2552.6	1371.85	3197.61	1710.47	1567.99	1125.33	485.616	611.082	1265.53	1378.52	862.276	1104.28
544	ENSG00000120217	CD274	95.1795	-1.18692	0.417663	-2.84182	0.00448575	0.180558	101.741	106.09	280.492	114.708	101.125	89.4803	77.3388	53.4354	37.4575	21.2081	81.1787	77.8998
545	ENSG00000258498	DIO3OS	609.106	6.68061	2.35039	2.84234	0.0044783	0.180558	57.4184	1.21942	1.07881	0	10.8737	0	0	4818.78	1.78369	2412.19	5.93991	0
546	ENSG00000153094	BCL2L11	375.475	0.94798	0.33389	2.8392	0.00452274	0.181	356.599	212.179	262.152	263.75	283.803	160.003	826.446	535.724	308.578	584.605	245.516	466.346
547	ENSG00000136869	TLR4	424.382	-0.985013	0.346929	-2.83923	0.00452223	0.181	625.559	338.999	646.21	645.33	699.178	428.444	163.67	153.455	199.773	447.214	391.044	353.707
548	ENSG00000256940	PPP1R14B-AS1	265.303	1.72298	0.607063	2.83822	0.00453656	0.181	86.6313	234.129	222.236	33.554	84.8148	79.6223	1142.1	301.43	202.449	494.24	227.696	74.7417
549	ENSG00000231793	DOC2GP	25.3182	-1.62391	0.572047	-2.83876	0.00452888	0.181	65.4772	10.9748	88.4628	28.0917	18.4853	18.1994	10.7915	8.22083	19.6206	14.7534	4.94992	15.7905
550	ENSG00000198648	STK39	1414.15	2.49594	0.880597	2.83437	0.0045916	0.182806	319.327	749.944	241.654	554.812	341.434	348.063	673.567	9363.52	82.9415	3945.62	76.2288	272.649
551	ENSG00000124313	IQSEC2	499.455	0.693177	0.244603	2.83389	0.00459851	0.182806	322.349	430.456	449.865	477.559	372.968	237.35	652.883	752.206	691.179	437.993	662.3	506.349
552	ENSG00000234518	PTGES3P1	75.2417	-1.60858	0.568043	-2.83179	0.0046288	0.183676	192.402	70.7264	125.142	107.685	132.659	50.8066	5.39573	46.5847	24.0798	16.5976	28.7095	102.112
553	ENSG00000124615	MOCS1	671.581	1.75296	0.619497	2.82966	0.00465976	0.183951	491.582	271.931	225.472	273.894	389.278	191.852	378.6	1690.75	350.495	3269.73	281.156	244.226
554	ENSG00000124788	ATXN1	556.34	-0.57939	0.204845	-2.82843	0.00467773	0.183951	829.042	675.559	708.781	605.533	520.85	660.486	354.319	342.534	441.463	514.526	535.582	487.4
555	ENSG00000152270	PDE3B	33.942	-1.08296	0.38284	-2.82876	0.00467282	0.183951	37.2716	32.9244	86.3051	42.1376	51.1064	27.2991	14.3886	16.4417	24.0798	24.8964	17.8197	32.6337
556	ENSG00000255299		3.66783	-4.27726	1.51109	-2.83059	0.00464627	0.183951	14.1028	0	22.6551	2.34098	0	3.03323	0	0	0.891844	0	0.989984	0
557	ENSG00000271009		34.3332	-1.06572	0.37671	-2.82903	0.004669	0.183951	41.301	34.1438	45.3102	67.8884	48.9316	40.9486	9.89217	20.5521	16.945	38.7278	16.8297	30.5283
558	ENSG00000176532	PRR15	30.772	2.499	0.883904	2.82723	0.00469521	0.184308	5.0367	3.65826	7.5517	14.8262	15.2232	9.0997	243.707	35.6236	18.7287	5.53254	3.95994	6.3162
559	ENSG00000145428	RNF175	16.1686	-2.88858	1.02261	-2.82473	0.00473211	0.184882	70.5139	4.87768	74.4382	15.6065	3.26211	2.27492	0	1.37014	7.13475	0.92209	0.989984	12.6324
560	ENSG00000252835	SCARNA21	190.489	-0.880645	0.311672	-2.82555	0.0047199	0.184882	166.211	214.618	346.299	222.393	332.735	199.435	133.095	115.092	121.291	162.288	70.2889	202.118
561	ENSG00000101276	SLC52A3	53.934	2.52163	0.892766	2.82452	0.00473517	0.184882	10.0734	18.2913	25.8915	4.68196	22.8348	14.4079	328.24	174.008	2.67553	28.5848	5.93991	11.5797
562	ENSG00000203805	PLPP4	12.9241	3.0192	1.06928	2.82357	0.00474918	0.1851	4.02936	0	4.31526	2.34098	3.26211	3.03323	38.6694	0	0	4.61045	48.5092	46.3188
563	ENSG00000264672	SEPTIN4-AS1	46.1937	1.53916	0.545494	2.8216	0.00477855	0.185913	21.1542	24.3884	32.3644	14.8262	33.7084	15.9245	26.0794	71.2472	76.6986	188.106	27.7196	22.1067
564	ENSG00000176092	CRYBG2	50.5253	2.052	0.728969	2.81493	0.00487879	0.189477	53.3891	23.169	9.70933	6.24261	14.1358	11.3746	240.11	134.274	16.945	59.9359	13.8598	23.1594
565	ENSG00000131042	LILRB2	310.758	-1.20841	0.429478	-2.81367	0.00489795	0.189885	737.374	145.111	630.027	490.825	402.327	197.16	128.598	163.046	275.58	165.054	111.868	282.124
566	ENSG00000186197	EDARADD	9.80437	-1.77941	0.632718	-2.81233	0.00491841	0.190263	28.2055	7.31653	16.1822	19.5081	16.3105	3.79154	9.89217	2.74028	1.78369	3.68836	2.96995	5.2635
567	ENSG00000256262	USP30-AS1	127.24	-1.50315	0.53457	-2.81189	0.00492508	0.190263	397.9	173.158	317.171	80.3736	86.9895	72.7976	29.6765	84.9486	56.1862	27.6627	66.329	133.693
568	ENSG00000150628	SPATA4	45.6333	1.6902	0.601472	2.81011	0.00495248	0.190649	10.0734	37.8021	22.6551	28.0917	14.1358	16.6828	43.1658	145.235	32.1064	42.4161	8.90986	146.325
569	ENSG00000132000	PODNL1	12.9495	2.50715	0.892023	2.81063	0.00494446	0.190649	5.0367	2.43884	6.47288	0.780326	6.52422	2.27492	87.2309	9.59097	1.78369	23.9743	2.96995	6.3162
570	ENSG00000106366	SERPINE1	3495.73	2.18192	0.777305	2.80704	0.00499991	0.191285	3140.89	913.346	1229.85	759.257	257.707	1273.96	3178.08	22089.4	745.582	4109.76	3936.18	314.757
571	ENSG00000179388	EGR3	80.7179	-1.47721	0.526246	-2.80707	0.00499943	0.191285	33.2423	209.74	104.645	44.4786	82.6401	238.109	15.2879	24.6625	54.4025	48.8708	51.4792	61.0566
572	ENSG00000247416		5.38106	4.39235	1.56491	2.80678	0.00500394	0.191285	2.01468	0	0	0	0	0.758308	10.7915	45.2146	0	3.68836	0	2.1054
573	ENSG00000110013	SIAE	1164.12	0.508671	0.181208	2.80712	0.00499874	0.191285	764.572	1017	828.529	1275.05	940.574	939.544	1507.21	1333.14	1230.74	1401.58	1499.83	1231.66
574	ENSG00000116717	GADD45A	1388.33	1.28643	0.458773	2.80407	0.00504627	0.191659	1047.63	1434.04	545.88	326.176	789.43	701.435	2223.94	2807.41	797.309	1088.99	3830.25	1067.44
575	ENSG00000248323	LUCAT1	408.078	2.05457	0.732754	2.80391	0.00504873	0.191659	295.151	179.255	213.605	80.3736	56.5432	125.121	250.901	2011.36	182.828	847.401	637.55	16.8432
576	ENSG00000196565	HBG2	5.40971	-4.86867	1.73596	-2.8046	0.00503794	0.191659	8.05873	0	4.31526	50.7212	0	0	0.899288	0	0	0.92209	0	0
577	ENSG00000183421	RIPK4	784.274	0.858844	0.306237	2.80451	0.00503934	0.191659	403.944	425.578	381.9	565.736	1001.47	566.456	836.338	908.401	1104.1	1541.73	885.046	790.578
578	ENSG00000215440	NPEPL1	304.772	1.45439	0.519041	2.80206	0.00507768	0.192425	153.116	103.651	101.409	243.462	154.406	221.426	1106.12	179.488	235.447	787.465	188.097	183.17
579	ENSG00000120457	KCNJ5	135.971	-1.15833	0.413583	-2.80073	0.00509878	0.192891	195.424	87.7983	311.777	106.124	287.065	139.529	100.72	30.143	69.5638	112.495	108.898	82.1106
580	ENSG00000204653	ASPDH	291.308	2.13821	0.763801	2.79944	0.00511914	0.192994	15.1101	302.416	20.4975	21.0688	212.037	76.5891	267.988	642.595	775.904	639.931	491.032	30.5283
581	ENSG00000187550	SBK2	17.125	-7.52702	2.68847	-2.79974	0.00511444	0.192994	2.01468	48.7768	153.192	0	0	1.51662	0	0	0	0	0	0
582	ENSG00000127564	PKMYT1	47.4536	-1.15301	0.412257	-2.79681	0.00516101	0.194238	108.793	67.0682	43.1526	46.8196	40.2327	87.2054	31.4751	12.3312	30.3227	20.286	55.4391	26.3175
583	ENSG00000173281	PPP1R3B	1634.88	0.799294	0.285845	2.79625	0.00516999	0.194243	924.739	1581.59	943.962	1327.33	1228.73	1153.39	2222.14	2238.81	2271.53	3173.83	1168.18	1384.3
584	ENSG00000280071		13.1437	1.58189	0.56659	2.79195	0.0052392	0.196506	6.04405	7.31653	3.23644	7.80326	10.8737	4.54985	40.468	4.11041	12.4858	18.4418	28.7095	13.6851
585	ENSG00000137225	CAPN11	124.744	2.62024	0.939634	2.78858	0.00529401	0.198222	11.0808	96.3343	45.3102	14.0459	27.1842	15.9245	547.666	123.312	10.7021	590.138	8.90986	6.3162
586	ENSG00000170743	SYT9	132.108	1.74443	0.625851	2.78729	0.00531514	0.198335	43.3157	74.3847	46.389	166.209	8.69895	25.0242	316.549	168.527	93.6436	87.5986	462.323	92.6376
587	ENSG00000287385		5.68944	3.68069	1.32044	2.78748	0.005312	0.198335	0	2.43884	1.07881	0.780326	0	0.758308	0	10.9611	40.133	10.143	1.97997	0
588	ENSG00000179583	CIITA	672.83	-1.0806	0.388115	-2.78422	0.00536559	0.199877	1617.79	502.401	1237.4	991.014	611.102	522.474	227.52	331.573	651.046	497.007	309.865	574.774
589	ENSG00000197296	FITM2	325.284	0.917313	0.329562	2.78343	0.00537878	0.200029	228.666	257.298	183.398	163.088	181.591	336.689	226.621	557.646	503.892	278.471	653.39	332.653
590	ENSG00000261187		10.1656	-1.81275	0.65163	-2.78187	0.00540463	0.200649	12.0881	6.09711	16.1822	23.4098	6.52422	30.3323	3.59715	5.48055	7.13475	0	6.92989	4.2108
591	ENSG00000240065	PSMB9	6010.22	-1.19323	0.429076	-2.78092	0.00542045	0.200896	11553.2	7636.01	11653.4	7015.13	8381.44	3939.41	829.144	2903.32	3380.09	3527.92	4939.03	6364.62
592	ENSG00000238117		113.059	4.82934	1.73804	2.77861	0.00545922	0.201991	23.1688	1.21942	19.4187	2.34098	0	0	0	805.641	5.35106	437.071	60.389	2.1054
593	ENSG00000113924	HGD	1502.41	1.00611	0.362289	2.77709	0.00548483	0.202355	626.566	1362.09	677.495	647.671	1487.52	1192.06	2491.03	1137.21	1862.17	1257.73	3445.15	1842.23
594	ENSG00000123575	FAM199X	642.207	1.04271	0.375714	2.77529	0.00551525	0.202355	398.907	320.708	386.215	594.608	446.909	370.813	1843.54	889.22	617.156	905.493	578.151	354.76
595	ENSG00000199568	RNU5A-1	30.7549	-2.03348	0.732592	-2.77573	0.00550781	0.202355	31.2276	49.9963	170.453	16.3868	19.5726	9.0997	4.49644	8.22083	3.56738	24.8964	6.92989	24.2121
596	ENSG00000267452	LINC02073	5.0583	-3.21199	1.1569	-2.77639	0.00549667	0.202355	9.06607	0	18.3398	3.90163	7.61158	15.9245	2.69786	0	0	0	0	3.1581
597	ENSG00000180638	SLC47A2	122.169	3.61909	1.30368	2.77605	0.00550233	0.202355	0	10.9748	30.2068	3.90163	60.8927	4.54985	48.5616	130.163	9.81028	34.1173	1127.59	5.2635
598	ENSG00000136167	LCP1	2342.2	-1.23267	0.444543	-2.77289	0.00555604	0.203171	6438.92	1181.62	4472.76	3141.59	3250.15	1231.49	940.655	1244.09	1521.49	1699.41	750.408	2233.83
599	ENSG00000267801		34.6927	1.45367	0.524147	2.77339	0.00554754	0.203171	12.0881	13.4136	36.6797	16.3868	23.9221	9.0997	12.59	69.877	55.2943	96.8195	22.7696	47.3715
600	ENSG00000226950	DANCR	233.774	0.84629	0.305295	2.77204	0.00557066	0.203366	293.136	142.672	111.118	139.678	137.009	178.961	299.463	305.541	368.332	368.836	291.055	169.485
601	ENSG00000286478		4.04347	-4.41954	1.59495	-2.77096	0.00558917	0.203702	3.02202	15.8525	6.47288	21.0688	0	0	0	0	0	0	0	2.1054
602	ENSG00000187653	TMSB4XP8	956.173	-1.20774	0.436157	-2.76906	0.00562182	0.203875	1598.65	1021.87	2166.26	434.642	2068.18	717.359	385.795	861.817	254.176	659.294	537.561	768.471
603	ENSG00000137558	PI15	7.42313	3.96913	1.43301	2.76978	0.00560934	0.203875	0	0	0	0	2.17474	3.03323	25.1801	5.48055	8.0266	45.1824	0	0
604	ENSG00000182048	TRPC2	67.6721	2.52407	0.911409	2.76941	0.00561577	0.203875	31.2276	24.3884	33.4432	11.7049	7.61158	12.1329	235.613	15.0715	8.91844	415.863	11.8798	4.2108
605	ENSG00000151883	PARP8	427.928	-0.621633	0.224713	-2.76635	0.00566883	0.20524	654.772	435.333	641.894	494.727	453.433	432.994	298.564	284.989	444.138	378.979	257.396	357.918
606	ENSG00000234919	LINC01827	38.4475	-1.79523	0.649163	-2.76545	0.00568441	0.205464	72.5285	12.1942	72.2805	53.0622	53.2811	94.7885	12.59	12.3312	32.9982	0	15.8397	29.4756
607	ENSG00000069974	RAB27A	465.083	-1.07609	0.389365	-2.7637	0.00571499	0.206229	1065.77	282.906	1213.67	511.113	361.007	351.097	257.196	293.21	278.255	313.511	339.565	313.705
608	ENSG00000285872		34.14	1.63181	0.59072	2.76242	0.00573749	0.206677	19.1395	13.4136	21.5763	9.36391	25.0095	11.3746	15.2879	147.975	47.2677	64.5463	16.8297	17.8959
609	ENSG00000106948	AKNA	517.01	-1.02838	0.372344	-2.76192	0.00574626	0.206677	988.201	378.021	1006.53	860.7	576.306	353.372	171.764	335.684	396.871	531.124	245.516	360.023
610	ENSG00000163295	ALPI	247.61	5.18921	1.87944	2.76103	0.00576186	0.206898	1.00734	17.0719	0	6.24261	10.8737	43.9819	672.667	0	73.1312	0	2145.3	1.0527
611	ENSG00000081237	PTPRC	1020.69	-1.12364	0.40757	-2.75693	0.00583475	0.207177	2129.52	657.268	2159.79	1464.67	1439.68	544.465	335.434	663.147	771.445	884.284	389.064	809.526
612	ENSG00000159023	EPB41	962.83	1.18293	0.429119	2.75665	0.00583972	0.207177	612.463	373.143	666.707	843.532	607.839	429.202	2105.23	1176.95	1278.9	2383.6	739.518	336.864
613	ENSG00000115085	ZAP70	66.848	-1.27159	0.461209	-2.75708	0.00583192	0.207177	151.101	70.7264	141.325	98.3211	70.679	35.6405	16.1872	19.1819	57.078	63.6242	26.7296	51.5823
614	ENSG00000253632		3.78216	-3.72162	1.35041	-2.75592	0.00585281	0.207177	15.1101	7.31653	12.9458	5.46228	0	0.758308	0	2.74028	0	0	0	1.0527
615	ENSG00000036672	USP2	391.863	1.72049	0.623891	2.75767	0.00582143	0.207177	130.954	251.201	133.773	236.439	225.085	117.538	914.576	126.053	373.683	187.184	1886.91	118.955
616	ENSG00000125384	PTGER2	71.0763	1.65652	0.600798	2.7572	0.00582982	0.207177	45.3303	26.8273	44.2314	8.58359	47.8442	32.6072	75.5402	257.586	28.539	208.392	40.5894	36.8445
617	ENSG00000247228		717.054	1.24453	0.451273	2.75782	0.00581886	0.207177	77.5653	818.232	253.521	486.143	431.686	486.834	858.82	1176.95	1612.45	823.427	897.916	681.097
618	ENSG00000105695	MAG	4.81153	-4.67389	1.69601	-2.75581	0.00585475	0.207177	1.00734	43.8992	0	3.90163	0	6.82477	0	0	0	0	0	2.1054
619	ENSG00000186951	PPARA	688.652	0.981565	0.355889	2.75806	0.00581448	0.207177	268.96	556.056	202.817	607.094	556.733	586.172	845.331	841.265	1303.88	687.879	1277.08	530.561
620	ENSG00000166407	LMO1	11.1915	3.53703	1.28389	2.75494	0.00587026	0.207373	0	3.65826	0	0	3.26211	3.79154	68.3459	19.1819	0	21.2081	14.8498	0
621	ENSG00000198056	PRIM1	14.1388	-1.5208	0.5522	-2.75408	0.00588577	0.207373	22.1615	14.6331	28.0492	8.58359	21.7474	30.3323	8.99288	10.9611	2.67553	11.0651	0.989984	9.4743
622	ENSG00000217442	SYCE3	129.305	1.56642	0.568797	2.75392	0.00588868	0.207373	77.5653	99.9925	53.9407	39.7966	65.2422	55.3565	32.3744	346.645	417.383	189.951	37.6194	135.798
623	ENSG00000186517	ARHGAP30	439.039	-1.19602	0.43485	-2.75042	0.00595193	0.209148	998.275	274.37	1101.47	560.274	406.676	326.831	110.612	191.819	296.984	416.785	230.666	353.707
624	ENSG00000273341		60.5873	-1.25455	0.456187	-2.75007	0.00595821	0.209148	123.903	57.3128	124.064	53.8425	103.3	50.0483	16.1872	20.5521	32.1064	26.7406	32.6695	86.3214
625	ENSG00000231574	LINC02015	208.782	2.52712	0.919163	2.74937	0.00597103	0.209263	71.5212	109.748	53.9407	0	102.213	33.3656	396.586	382.268	82.9415	1201.48	20.7897	50.5296
626	ENSG00000260828	HMGB3P32	3.58348	-3.21143	1.16859	-2.74812	0.00599388	0.209728	10.0734	0	7.5517	8.58359	10.8737	1.51662	0	1.37014	0	0	1.97997	1.0527
627	ENSG00000267737		11.3001	1.94385	0.707799	2.74634	0.00602651	0.210534	5.0367	0	5.39407	2.34098	13.0484	2.27492	4.49644	30.143	30.3227	15.6755	7.91987	18.9486
628	ENSG00000253731	PCDHGA6	63.0054	1.90415	0.693833	2.7444	0.00606224	0.211445	9.06607	25.6078	20.4975	21.0688	56.5432	26.5408	26.0794	284.989	172.126	37.8057	67.3189	8.4216
629	ENSG00000261431	DHX35-DT	122.497	0.948202	0.345627	2.74342	0.00608023	0.211735	80.5873	112.187	64.7288	99.8817	71.7664	72.7976	161.872	128.793	209.583	72.8451	113.848	281.071
630	ENSG00000231740		45.1697	5.19681	1.89594	2.74102	0.00612479	0.212948	0	9.75537	3.23644	1.56065	0	0	388.492	134.274	2.67553	0	0.989984	1.0527
631	ENSG00000158955	WNT9B	17.7789	-1.42653	0.520562	-2.74036	0.00613716	0.21304	41.301	25.6078	31.2856	9.36391	10.8737	37.1571	9.89217	5.48055	7.13475	4.61045	14.8498	15.7905
632	ENSG00000132563	REEP2	8.88204	-2.11092	0.770692	-2.739	0.00616266	0.213433	26.1909	4.87768	24.8127	7.02293	6.52422	17.4411	5.39573	1.37014	2.67553	9.2209	0	1.0527
633	ENSG00000177721	ANXA2R	755.006	-1.33334	0.486849	-2.73872	0.00616797	0.213433	1187.66	2042.53	1013.01	494.727	281.629	1465.81	270.686	763.167	230.988	402.953	240.566	666.359
634	ENSG00000240032	LNCSRLR	4.75327	2.53624	0.926322	2.73797	0.00618202	0.213574	2.01468	3.65826	0	0	3.26211	0	16.1872	2.74028	9.81028	10.143	3.95994	5.2635
635	ENSG00000149596	JPH2	462.817	1.78136	0.650734	2.73746	0.00619155	0.213574	164.197	254.859	325.802	159.967	93.5138	253.275	158.275	948.135	583.266	2330.12	128.698	153.694
636	ENSG00000279727	LINC02033	3.38852	-2.60286	0.95109	-2.73672	0.00620558	0.213722	7.05139	6.09711	2.15763	4.68196	7.61158	7.58308	0	0	3.56738	0.92209	0.989984	0
637	ENSG00000156103	MMP16	29.7097	2.1334	0.780086	2.73483	0.00624123	0.214361	10.0734	1.21942	9.70933	16.3868	13.0484	15.1662	29.6765	169.897	2.67553	59.0138	13.8598	15.7905
638	ENSG00000161653	NAGS	155.195	1.64128	0.60017	2.7347	0.00624373	0.214361	89.6533	54.8739	128.379	33.554	50.019	95.5468	208.635	437.074	387.952	296.913	20.7897	58.9512
639	ENSG00000181017	OR56B2P	3.987	-2.29641	0.840486	-2.73224	0.00629047	0.215628	8.05873	1.21942	5.39407	3.1213	11.9611	9.858	0.899288	1.37014	0.891844	0.92209	0.989984	3.1581
640	ENSG00000183549	ACSM5	1650.88	1.26642	0.463762	2.73075	0.00631908	0.216271	610.449	1999.85	534.013	1095.58	1092.81	484.559	2248.22	4866.73	993.514	2617.81	2153.22	1113.76
641	ENSG00000235434	RNF186-AS1	105.977	1.23533	0.452681	2.72892	0.0063542	0.217133	32.2349	71.9458	101.409	77.2523	84.8148	12.1329	168.167	112.351	153.397	82.066	213.837	162.116
642	ENSG00000189007	ADAT2	97.2217	-0.936439	0.343323	-2.72757	0.00638024	0.217683	174.27	121.942	151.034	84.2752	89.1643	145.595	35.0722	73.9874	78.4823	112.495	44.5493	55.7931
643	ENSG00000111247	RAD51AP1	84.1941	-1.07781	0.39531	-2.7265	0.00640095	0.21805	263.923	86.5789	85.2263	63.9867	80.4653	105.405	46.763	45.2146	34.7819	58.0917	68.3089	71.5836
644	ENSG00000260142		6.43568	-2.77116	1.01664	-2.7258	0.00641455	0.218174	23.1688	0	9.70933	17.1672	9.78632	7.58308	0	0	1.78369	2.76627	0	5.2635
645	ENSG00000238098	ABCA17P	263.25	2.11065	0.774684	2.72453	0.00643924	0.218675	77.5653	18.2913	163.98	43.6983	253.357	37.1571	121.404	1194.76	764.31	336.563	24.7496	123.166
646	ENSG00000177034	MTX3	271.538	-0.625711	0.229739	-2.72357	0.006458	0.218972	427.113	293.88	368.954	340.222	195.726	350.338	235.613	253.476	206.908	189.028	210.867	186.328
647	ENSG00000177839	PCDHB9	56.6531	1.3629	0.500857	2.72114	0.00650566	0.219923	31.2276	25.6078	5.39407	22.6295	68.5043	37.1571	52.1587	47.9548	112.372	108.807	122.758	45.2661
648	ENSG00000187720	THSD4	116.123	1.8652	0.685549	2.72073	0.00651375	0.219923	143.042	53.6545	34.5221	10.1442	21.7474	37.1571	345.327	297.32	22.2961	131.859	256.406	40.0026
649	ENSG00000100290	BIK	15.3348	1.83589	0.674808	2.72061	0.00651616	0.219923	8.05873	1.21942	4.31526	9.36391	8.69895	8.34139	9.89217	5.48055	23.1879	16.5976	76.2288	12.6324
650	ENSG00000181036	FCRL6	35.7295	-1.31839	0.485339	-2.71643	0.00659897	0.222305	92.6754	36.5826	66.8865	24.1901	51.1064	34.1239	8.99288	34.2534	7.13475	33.1952	22.7696	16.8432
651	ENSG00000233896	PDYN-AS1	8.31071	3.97184	1.46237	2.71603	0.00660704	0.222305	3.02202	0	0	0.780326	2.17474	0	10.7915	73.9874	0	0	7.91987	1.0527
652	ENSG00000186818	LILRB4	640.968	-1.00423	0.369879	-2.71501	0.00662741	0.222648	1175.57	458.502	1507.1	545.448	894.905	550.532	257.196	639.854	354.954	388.2	343.525	575.827
653	ENSG00000135245	HILPDA	3387.65	1.15892	0.427027	2.71393	0.00664907	0.223034	1961.29	3616.8	1314	1502.91	2209.53	1970.08	5885.84	7986.53	1138.88	4750.61	5548.86	2766.5
654	ENSG00000275479		45.1512	1.31222	0.483654	2.71314	0.00666494	0.223224	20.1468	19.5107	9.70933	22.6295	56.5432	27.2991	45.8637	30.143	145.371	51.637	61.379	51.5823
655	ENSG00000160209	PDXK	1923.21	1.03609	0.382106	2.71151	0.00669766	0.223637	1031.52	730.433	1295.66	1654.29	1177.62	1675.1	5888.54	2112.75	2304.53	1781.48	2091.84	1334.82
656	ENSG00000182912	TSPEAR-AS2	55.9846	8.14327	3.00272	2.71196	0.00668857	0.223637	0	0	0	0	0	2.27492	594.429	4.11041	0	71.0009	0	0
657	ENSG00000225492	GBP1P1	227.947	-1.3801	0.509138	-2.71066	0.00671498	0.223873	497.626	307.294	370.033	255.167	424.074	121.329	45.8637	189.079	36.5656	98.6636	97.0185	292.651
658	ENSG00000235728		4.66507	3.02534	1.11756	2.70709	0.00678759	0.22595	0	1.21942	0	3.1213	0	1.51662	3.59715	0	22.2961	5.53254	3.95994	14.7378
659	ENSG00000109062	SLC9A3R1	5050.61	0.964794	0.356503	2.70627	0.0068044	0.226166	1681.25	5025.23	2798.44	2705.39	4596.31	3726.33	6075.59	7071.28	7447.79	6236.1	10459.2	2784.39
660	ENSG00000250366	TUNAR	24.317	-8.1278	3.00435	-2.70534	0.00682348	0.226194	217.586	73.1653	0	0	0	0	0	0	0	0	0	1.0527
661	ENSG00000142303	ADAMTS10	235.684	1.88167	0.695569	2.70522	0.00682589	0.226194	294.144	65.8487	57.1771	72.5703	68.5043	45.4985	203.239	524.763	438.787	948.831	26.7296	82.1106
662	ENSG00000113296	THBS4	98.1157	-1.70091	0.629019	-2.70406	0.00684975	0.226642	233.703	30.4855	65.8077	60.8654	424.074	84.9305	49.4608	102.76	37.4575	35.9615	11.8798	40.0026
663	ENSG00000168743	NPNT	359.563	-1.58512	0.586358	-2.70334	0.00686473	0.226795	158.153	129.259	1156.49	728.044	166.367	897.837	153.778	75.3576	171.234	165.976	122.758	389.499
664	ENSG00000110934	BIN2	438.09	-1.19811	0.443369	-2.70229	0.00688639	0.227168	1043.61	273.15	1127.36	438.543	467.569	310.906	116.008	317.872	303.227	326.42	153.448	378.972
665	ENSG00000211721	TRBV6-5	7.66715	-1.94015	0.718125	-2.70169	0.00689885	0.227237	19.1395	12.1942	11.867	4.68196	21.7474	3.03323	0	6.85069	2.67553	3.68836	2.96995	3.1581
666	ENSG00000113805	CNTN3	5.07652	4.82488	1.78711	2.69982	0.00693779	0.227834	1.00734	0	0	0	0	0.758308	48.5616	1.37014	0	9.2209	0	0
667	ENSG00000196735	HLA-DQA1	9963.79	-1.3763	0.509734	-2.70004	0.00693314	0.227834	20550.8	8733.49	32915.7	10028.7	6404.6	7682.42	1544.08	7589.19	4539.49	6392.85	3071.92	10112.2
668	ENSG00000257210	NACAP8	11.9963	2.45644	0.910114	2.69905	0.0069538	0.227881	3.02202	15.8525	2.15763	0.780326	1.08737	0	24.2808	2.74028	33.8901	3.68836	22.7696	33.6864
669	ENSG00000205352	PRR13	2532.84	0.89754	0.332576	2.69875	0.00696002	0.227881	2449.85	1260.88	1603.12	1510.71	1939.87	1852.55	6286.92	2014.1	2952	3766.74	2922.43	1834.86
670	ENSG00000103184	SEC14L5	8.78728	3.21558	1.19226	2.69704	0.00699589	0.228714	1.00734	2.43884	5.39407	0	0	1.51662	3.59715	60.2861	6.24291	23.9743	0.989984	0
671	ENSG00000106236	NPTX2	4815.4	2.38266	0.883714	2.69618	0.00701392	0.228961	1717.52	274.37	2221.28	534.523	275.104	4274.58	24569.4	6849.32	2284.9	12462	2252.21	69.4782
672	ENSG00000187239	FNBP1	759.815	-0.856214	0.317678	-2.69523	0.00703399	0.229275	1519.07	464.599	1205.04	1129.91	710.052	844.755	434.356	415.152	480.704	792.998	514.792	606.355
673	ENSG00000197893	NRAP	4.26587	5.06872	1.88162	2.6938	0.00706426	0.229919	1.00734	0	0	0	0	0	19.7843	0	0.891844	29.5069	0	0
674	ENSG00000157399	ARSL	1993.53	0.903329	0.335491	2.69256	0.00709062	0.230244	1632.9	2418.11	1009.77	1165.81	1176.53	931.961	4202.37	3026.63	2189.48	1410.8	2130.45	2627.54
675	ENSG00000226981	ABHD17AP6	11.7976	3.49714	1.29892	2.69234	0.00709527	0.230244	2.01468	1.21942	0	3.90163	1.08737	3.03323	11.6907	112.351	5.35106	0.92209	0	0
676	ENSG00000211728	TRBV5-6	5.09123	-2.86255	1.06403	-2.69029	0.00713903	0.231321	4.02936	1.21942	9.70933	2.34098	29.359	6.82477	0	2.74028	0	2.76627	0	2.1054
677	ENSG00000153822	KCNJ16	2150.66	1.0256	0.381386	2.68914	0.00716358	0.231774	1941.15	1596.22	808.032	913.762	1386.4	1855.58	5057.6	3691.15	2551.57	2430.63	2562.08	1013.75
678	ENSG00000122035	RASL11A	588.34	1.49416	0.556082	2.68695	0.00721087	0.23296	114.837	365.826	414.265	168.55	403.414	382.946	204.138	1135.84	955.165	2222.24	395.994	296.861
679	ENSG00000169436	COL22A1	74.3754	2.71863	1.01216	2.68598	0.00723182	0.233293	75.5506	3.65826	2.15763	33.554	1.08737	1.51662	116.008	306.911	21.4043	304.29	15.8397	10.527
680	ENSG00000132274	TRIM22	1398.04	-0.798089	0.297288	-2.68456	0.00726249	0.233645	2275.58	1386.48	2295.72	1775.24	1241.78	1675.1	1185.26	1383.84	502.108	746.893	1114.72	1193.76
681	ENSG00000131142	CCL25	6.06711	-3.23401	1.2047	-2.68449	0.00726407	0.233645	11.0808	0	43.1526	4.68196	5.43685	1.51662	1.79858	0	0	0	1.97997	3.1581
682	ENSG00000230373	GOLGA6L5P	11.8527	-2.44132	0.909723	-2.68359	0.00728361	0.23393	1.00734	25.6078	2.15763	5.46228	41.32	44.7402	3.59715	2.74028	6.24291	7.37672	1.97997	0
683	ENSG00000200169	RNU5D-1	15.5855	-1.80725	0.673983	-2.68145	0.00733043	0.234104	15.1101	39.0215	50.7043	20.2885	14.1358	6.06646	4.49644	8.22083	0	7.37672	7.91987	13.6851
684	ENSG00000236296	GUSBP5	8.38792	-1.78443	0.665487	-2.68139	0.00733179	0.234104	6.04405	9.75537	16.1822	12.4852	17.3979	16.6828	10.7915	0	4.45922	1.84418	3.95994	1.0527
685	ENSG00000211445	GPX3	84557.8	1.17593	0.438333	2.68273	0.00730234	0.234104	116831	73877.4	21938.8	35279.3	35646.1	27741.9	112631	187761	98249.1	73931.3	150444	80362.1
686	ENSG00000203797	DDO	246.292	-0.596627	0.222506	-2.6814	0.00733142	0.234104	301.195	353.632	321.487	239.56	313.162	250.242	159.174	202.78	179.261	205.626	151.468	277.913
687	ENSG00000237398	HLA-DPA3	3.33539	-3.54981	1.32461	-2.67989	0.00736465	0.234811	10.0734	1.21942	15.1034	0	8.69895	1.51662	0	1.37014	0	0	0.989984	1.0527
688	ENSG00000151117	TMEM86A	218.459	-1.00096	0.373668	-2.67873	0.00739024	0.235259	397.9	129.259	449.865	241.901	369.706	160.003	143.886	115.092	126.642	251.731	120.778	114.744
689	ENSG00000246273	SBF2-AS1	306.505	0.958614	0.357987	2.67779	0.00741093	0.235259	159.16	264.614	210.369	218.491	234.872	161.52	317.449	924.843	329.09	322.732	280.166	254.753
690	ENSG00000166211	SPIC	18.9971	-3.26956	1.22095	-2.67788	0.00740905	0.235259	83.6093	0	77.6746	5.46228	6.52422	33.3656	12.59	1.37014	0	0	0	7.3689
691	ENSG00000178828	RNF186	1874.75	2.01521	0.752707	2.67728	0.00742217	0.235275	154.123	558.495	2768.24	330.858	346.871	303.323	1535.98	3300.66	1468.87	2220.39	9237.54	271.597
692	ENSG00000159189	C1QC	9992.1	-1.38322	0.516782	-2.67661	0.00743714	0.235409	24817.9	6256.85	30115.1	5697.94	13236.5	6552.54	3092.65	5757.32	2226.93	11207.1	4195.55	6748.86
693	ENSG00000150625	GPM6A	238.304	-2.30075	0.860009	-2.67527	0.007467	0.236013	13.0954	1191.37	81.9899	42.1376	326.211	722.668	89.9288	24.6625	106.129	25.8185	218.787	16.8432
694	ENSG00000087085	ACHE	174.33	1.70322	0.636843	2.67447	0.00748473	0.236233	29.2129	41.4603	28.0492	52.2818	36.9706	302.565	253.599	254.846	487.839	270.172	279.176	55.7931
695	ENSG00000197646	PDCD1LG2	73.8474	-1.38798	0.519274	-2.67292	0.00751939	0.236985	161.175	48.7768	167.216	103.783	101.125	59.148	24.2808	27.4028	6.24291	58.0917	75.2388	53.6877
696	ENSG00000090565	RAB11FIP3	2450.05	1.24769	0.466941	2.67205	0.00753902	0.237263	463.377	2638.83	665.628	1721.4	1409.23	1813.87	2514.41	3318.47	3387.22	1822.97	7522.89	2122.24
697	ENSG00000238000	PSME2P1	44.1891	-1.46209	0.547468	-2.67064	0.00757058	0.237266	80.5873	46.338	112.197	19.5081	88.0769	41.7069	15.2879	45.2146	8.91844	6.45463	38.6094	27.3702
698	ENSG00000257556	LINC02298	322.048	1.15467	0.432365	2.6706	0.00757162	0.237266	104.763	370.704	206.053	85.8359	214.212	216.876	424.464	563.127	203.34	509.916	748.428	216.856
699	ENSG00000139974	SLC38A6	226.589	-0.569023	0.213055	-2.67078	0.00756755	0.237266	211.542	248.762	267.546	282.478	321.861	292.707	244.606	150.715	153.397	213.925	167.307	164.221
700	ENSG00000286785	LINC01622	173.546	1.97397	0.739517	2.66927	0.00760162	0.237763	4.02936	62.1905	185.556	83.4949	53.2811	34.1239	16.1872	398.71	614.481	125.404	335.605	169.485
701	ENSG00000259631		42.9953	1.85298	0.694276	2.66894	0.0076092	0.237763	8.05873	19.5107	16.1822	44.4786	9.78632	13.6495	129.497	20.5521	27.6472	159.522	4.94992	62.1093
702	ENSG00000233828	MIR4280HG	4.69874	-3.13555	1.17578	-2.66678	0.00765811	0.23895	7.05139	4.87768	28.0492	7.80326	0	3.03323	0	0	0.891844	3.68836	0.989984	0
703	ENSG00000247982	LINC00926	95.8559	1.66834	0.626052	2.66486	0.00770213	0.239982	81.5946	31.7049	47.4678	23.4098	35.8832	55.3565	335.434	46.5847	136.452	33.1952	298.975	24.2121
704	ENSG00000162931	TRIM17	7.0717	-3.97715	1.49304	-2.6638	0.00772637	0.240396	64.4698	4.87768	1.07881	9.36391	0	0	0	0	0	0.92209	0.989984	3.1581
705	ENSG00000169903	TM4SF4	16.4883	2.82474	1.06205	2.65971	0.00782085	0.242406	3.02202	9.75537	4.31526	1.56065	5.43685	0.758308	104.317	5.48055	0	3.68836	57.4191	2.1054
706	ENSG00000233077	LINC01271	16.5505	2.24331	0.843378	2.65991	0.00781608	0.242406	12.0881	7.31653	7.5517	3.1213	3.26211	1.51662	37.7701	47.9548	4.45922	67.3126	0.989984	5.2635
707	ENSG00000274602	PI4KAP1	216.799	-1.26692	0.476363	-2.65956	0.0078242	0.242406	167.219	109.748	352.772	370.655	235.959	601.338	206.836	117.832	202.449	46.1045	64.349	126.324
708	ENSG00000260201		119.578	1.8319	0.689354	2.65742	0.00787421	0.243611	36.2643	48.7768	10.7881	7.80326	197.901	13.6495	98.9217	301.43	188.179	113.417	300.955	116.85
709	ENSG00000232140		21.3045	3.06033	1.15232	2.65581	0.00791186	0.244021	0	18.2913	2.15763	0	1.08737	6.06646	50.3601	145.235	4.45922	23.9743	2.96995	1.0527
710	ENSG00000145934	TENM2	105.872	2.88179	1.08583	2.65401	0.00795421	0.244021	53.3891	0	78.7534	10.9246	6.52422	2.27492	27.8779	398.71	460.192	0.92209	27.7196	203.171
711	ENSG00000172348	RCAN2	1381.49	1.96233	0.73895	2.65557	0.00791744	0.244021	196.431	262.176	1758.47	424.497	391.453	352.613	344.427	180.858	5977.14	905.493	3843.12	1941.18
712	ENSG00000272839		10.9635	-1.517	0.571693	-2.65353	0.00796546	0.244021	22.1615	17.0719	20.4975	12.4852	21.7474	3.79154	1.79858	4.11041	7.13475	4.61045	10.8898	5.2635
713	ENSG00000196781	TLE1	425.549	0.973452	0.366667	2.65486	0.00793402	0.244021	199.454	347.535	186.635	289.501	270.755	429.202	598.926	361.716	354.954	953.441	819.707	294.756
714	ENSG00000255146		26.3551	1.53393	0.578064	2.65357	0.00796453	0.244021	8.05873	17.0719	5.39407	21.0688	22.8348	6.82477	6.29502	39.734	68.672	41.4941	18.8097	60.0039
715	ENSG00000179841	AKAP5	54.316	-1.50442	0.566944	-2.65356	0.00796485	0.244021	85.624	71.9458	110.039	71.0097	39.1453	104.647	16.1872	4.11041	11.594	67.3126	55.4391	14.7378
716	ENSG00000166828	SCNN1G	22.4069	7.96708	3.00449	2.65172	0.0080082	0.244988	0	0	0	0	0	0	27.8779	0	0	236.055	4.94992	0
717	ENSG00000173621	LRFN4	112.102	2.01055	0.758352	2.65121	0.00802041	0.24502	19.1395	9.75537	79.8322	89.7375	50.019	18.9577	448.745	23.2923	239.014	307.056	21.7797	37.8972
718	ENSG00000135744	AGT	2439.07	1.68089	0.634306	2.64996	0.00805005	0.245241	210.534	1710.85	2363.68	612.556	1668.02	393.562	5558.5	1527.7	3872.39	8921.22	1227.58	1202.18
719	ENSG00000237651	C2orf74	34.9161	1.55038	0.584971	2.65036	0.0080407	0.245241	3.02202	21.9496	26.9704	27.3114	17.3979	9.858	34.1729	93.1694	34.7819	8.29881	67.3189	74.7417
720	ENSG00000247516	MIR4458HG	7148.7	1.94539	0.734391	2.64898	0.0080734	0.24527	8483.83	870.667	579.323	657.815	614.364	6475.95	22859	11879.1	4533.24	4631.66	4352.96	19846.6
721	ENSG00000251602	MTA1-DT	33.8647	1.36075	0.513621	2.64933	0.00806524	0.24527	18.1321	8.53595	12.9458	17.9475	42.4074	13.6495	24.2808	101.39	24.9716	51.637	67.3189	23.1594
722	ENSG00000181467	RAP2B	803.906	-0.740963	0.279831	-2.6479	0.00809939	0.245379	1127.21	819.451	1229.85	598.51	1285.27	976.701	807.561	349.385	540.458	738.594	629.63	544.246
723	ENSG00000105750	ZNF85	122.353	-1.04546	0.394814	-2.64799	0.00809711	0.245379	134.984	149.989	374.349	85.0555	86.9895	157.728	97.1231	84.9486	52.6188	60.8579	93.0585	90.5322
724	ENSG00000261455	LINC01003	77.3404	-0.737524	0.27859	-2.64734	0.00811266	0.245442	83.6093	104.87	61.4924	103.003	137.009	90.997	62.0509	35.6236	66.8883	54.4033	54.4491	73.689
725	ENSG00000164691	TAGAP	133.565	-1.02888	0.389134	-2.64403	0.00819266	0.246839	288.1	107.309	258.915	114.708	187.028	119.813	33.2737	71.2472	115.94	94.0532	87.1186	125.271
726	ENSG00000106560	GIMAP2	722.375	-1.14381	0.432589	-2.64411	0.00819055	0.246839	1385.09	621.905	1974.23	736.628	907.953	341.997	334.535	408.301	279.147	536.656	317.785	824.264
727	ENSG00000158865	SLC5A11	9.09178	2.81735	1.0653	2.64465	0.00817756	0.246839	2.01468	4.87768	2.15763	0.780326	0	3.79154	0.899288	12.3312	28.539	0	49.4992	4.2108
728	ENSG00000197536	IRF1-AS1	278.816	-0.832407	0.315014	-2.64244	0.00823107	0.247656	456.325	257.298	330.117	542.327	194.639	361.713	144.785	150.715	300.551	165.976	211.857	229.489
729	ENSG00000232006		62.8006	5.68254	2.15157	2.64112	0.00826336	0.247946	2.01468	1.21942	6.47288	4.68196	0	0	151.08	0	1.78369	0	0	586.354
730	ENSG00000110786	PTPN5	10.7646	-2.24232	0.848964	-2.64124	0.00826037	0.247946	26.1909	28.0467	23.7339	10.1442	11.9611	6.82477	3.59715	0	1.78369	0	15.8397	1.0527
731	ENSG00000237614		40.216	2.14804	0.813751	2.63968	0.00829836	0.248518	5.0367	37.8021	5.39407	2.34098	8.69895	29.574	29.6765	191.819	11.594	130.015	14.8498	15.7905
732	ENSG00000137203	TFAP2A	14.6268	2.67854	1.01483	2.63941	0.00830512	0.248518	4.02936	2.43884	9.70933	1.56065	2.17474	3.79154	9.89217	86.3187	49.9433	4.61045	0	1.0527
733	ENSG00000205089	CCNI2	12.1256	-1.8544	0.702983	-2.6379	0.00834203	0.248808	44.323	9.75537	34.5221	12.4852	6.52422	6.82477	13.4893	1.37014	3.56738	6.45463	1.97997	4.2108
734	ENSG00000167183	PRR15L	40.1291	4.18162	1.58518	2.63794	0.00834115	0.248808	9.06607	9.75537	0	0	6.52422	0	320.147	0	55.2943	5.53254	8.90986	66.3201
735	ENSG00000243156	MICAL3	256.247	0.964437	0.365646	2.63762	0.00834889	0.248808	97.7121	135.356	112.197	292.622	170.717	232.042	425.363	452.146	304.119	229.6	450.443	172.643
736	ENSG00000172673	THEMIS	76.8537	-1.43475	0.544088	-2.63698	0.00836484	0.248945	178.299	40.2409	189.871	172.452	61.98	30.3323	15.2879	38.3639	31.2145	83.9102	28.7095	51.5823
737	ENSG00000248837		7.38297	2.08888	0.792592	2.63551	0.00840111	0.249685	1.00734	1.21942	4.31526	1.56065	3.26211	5.30816	2.69786	12.3312	9.81028	1.84418	33.6595	11.5797
738	ENSG00000284543	LINC01226	30.1303	2.17539	0.826322	2.63262	0.00847299	0.250472	4.02936	9.75537	10.7881	2.34098	30.4463	8.34139	9.89217	134.274	26.7553	92.209	31.6795	1.0527
739	ENSG00000180694	TMEM64	444.004	-0.556062	0.211192	-2.63297	0.00846417	0.250472	610.449	519.473	415.343	614.897	552.384	457.26	243.707	460.366	367.44	362.381	347.485	376.867
740	ENSG00000176273	SLC35G1	72.9777	-0.678598	0.257753	-2.63275	0.00846972	0.250472	109.8	64.6293	74.4382	113.928	67.4169	107.68	54.8566	57.5458	52.6188	45.1824	62.369	65.2674
741	ENSG00000181143	MUC16	5.99734	4.34684	1.65116	2.6326	0.00847334	0.250472	0	0	0	3.1213	0	0	52.1587	0	3.56738	0	8.90986	4.2108
742	ENSG00000280241		163.974	5.92636	2.2528	2.63067	0.00852173	0.251563	1.00734	0	18.3398	0	1.08737	11.3746	0	790.57	79.3741	1065.94	0	0
743	ENSG00000249395	CASC9	62.3885	7.86554	2.99161	2.6292	0.00855869	0.252041	0	0	3.23644	0	0	0	269.786	467.217	0	0	0	8.4216
744	ENSG00000104879	CKM	4.20521	-2.19525	0.834978	-2.62911	0.00856092	0.252041	9.06607	3.65826	6.47288	8.58359	4.34948	9.0997	0	2.74028	0.891844	4.61045	0.989984	0
745	ENSG00000134955	SLC37A2	335.234	-1.01717	0.387009	-2.62828	0.00858182	0.252317	381.782	221.935	782.14	397.186	567.607	342.755	184.354	86.3187	296.092	328.264	172.257	262.122
746	ENSG00000161800	RACGAP1	196.749	-0.768688	0.292537	-2.62766	0.00859753	0.25244	385.812	220.715	274.019	189.619	185.94	232.042	120.505	130.163	125.75	243.432	110.878	142.115
747	ENSG00000104972	LILRB1	338.072	-0.958987	0.36517	-2.62614	0.008636	0.25323	725.285	197.546	634.343	513.454	382.754	225.217	188.85	267.177	299.66	212.081	150.478	260.017
748	ENSG00000172594	SMPDL3A	3930.82	-0.899978	0.342918	-2.62447	0.00867845	0.254135	4937.99	5323.99	5718.79	6902.76	5804.38	2023.92	4143.02	2789.6	2064.62	2822.52	1395.88	3242.32
749	ENSG00000109272	PF4V1	396.41	2.46407	0.93908	2.62392	0.00869244	0.254204	172.255	145.111	169.374	101.442	67.4169	74.3142	9.89217	1409.87	554.727	1814.67	0.989984	236.858
750	ENSG00000145864	GABRB2	10.7595	-5.87087	2.23901	-2.62209	0.00873934	0.255235	0	20.7302	0	0	9.78632	96.3051	0	1.37014	0	0.92209	0	0
751	ENSG00000237674	GSTA7P	234.21	2.16479	0.825882	2.62119	0.00876242	0.255569	23.1688	181.694	10.7881	98.3211	191.377	7.58308	552.163	13.7014	386.168	165.976	240.566	939.008
752	ENSG00000188282	RUFY4	18.8754	-1.29831	0.495539	-2.61999	0.00879313	0.256123	38.279	18.2913	36.6797	24.9704	21.7474	21.2326	1.79858	6.85069	17.8369	7.37672	18.8097	12.6324
753	ENSG00000211751	TRBC1	741.001	-1.26994	0.484814	-2.61944	0.00880745	0.2562	1260.18	984.073	1411.09	1390.54	835.1	404.936	120.505	269.917	384.385	1060.4	244.526	526.35
754	ENSG00000153283	CD96	276.378	-1.27914	0.488511	-2.61843	0.00883344	0.256275	751.476	201.204	773.51	259.849	223.998	138.77	73.7416	157.566	126.642	262.796	122.758	224.225
755	ENSG00000206172	HBA1	5205.76	-1.73259	0.661661	-2.61854	0.00883069	0.256275	23029.8	4880.12	11945.7	6242.61	1088.46	832.622	1485.62	3644.57	2168.07	2921.18	3363.97	866.372
756	ENSG00000112303	VNN2	127.594	-1.31664	0.503156	-2.61676	0.00887674	0.256851	498.634	104.87	229.787	119.39	68.5043	71.281	98.0224	83.5784	59.7536	59.9359	41.5793	95.7957
757	ENSG00000101639	CEP192	174.139	-0.606642	0.23181	-2.61698	0.00887119	0.256851	175.277	218.276	227.63	257.508	166.367	216.118	98.0224	113.721	131.993	137.391	183.147	164.221
758	ENSG00000164932	CTHRC1	625.97	1.62934	0.623053	2.61509	0.00892029	0.25777	672.904	184.133	295.595	140.459	450.171	91.7553	205.038	2251.14	479.812	1722.46	744.468	273.702
759	ENSG00000078589	P2RY10	113.795	-1.42212	0.544148	-2.61347	0.00896278	0.258657	242.769	37.8021	357.087	172.452	122.873	61.4229	23.3815	61.6562	88.2926	70.0789	27.7196	100.007
760	ENSG00000168237	GLYCTK	510.288	0.877879	0.336067	2.61222	0.00899577	0.258684	350.555	190.23	261.073	312.911	476.268	565.698	435.255	886.479	523.512	638.086	994.934	488.453
761	ENSG00000242948	EPS15P1	5.36187	4.89629	1.87447	2.61209	0.00899914	0.258684	2.01468	0	0	0	0	0	0	12.3312	0	47.0266	2.96995	0
762	ENSG00000179331	RAB39A	16.0057	-1.48436	0.568197	-2.6124	0.00899079	0.258684	17.1248	14.6331	47.4678	7.02293	17.3979	37.1571	3.59715	17.8118	5.35106	10.143	5.93991	8.4216
763	ENSG00000272482		44.0937	1.67292	0.642089	2.60543	0.00917579	0.259358	6.04405	56.0934	33.4432	7.80326	20.66	3.03323	22.4822	139.754	68.672	62.7021	66.329	42.108
764	ENSG00000175793	SFN	231.048	3.37309	1.29415	2.60641	0.00914959	0.259358	31.2276	26.8273	28.0492	0.780326	93.5138	63.6979	1485.62	17.8118	4.45922	32.2732	983.054	5.2635
765	ENSG00000173369	C1QB	21221.7	-1.44716	0.555668	-2.60436	0.00920469	0.259358	59691	10694.3	62879.8	11755.6	27329.9	13975.6	5518.93	15457.9	4433.36	23410	6615.08	12898.7
766	ENSG00000174500	GCSAM	27.5922	-1.44891	0.555774	-2.60701	0.0091336	0.259358	84.6166	4.87768	47.4678	45.2589	38.0579	21.9909	18.885	16.4417	10.7021	22.1302	5.93991	14.7378
767	ENSG00000153044	CENPH	200.377	-0.860479	0.330542	-2.60324	0.00923483	0.259358	372.716	213.399	172.61	327.737	123.96	339.722	208.635	127.423	113.264	120.794	115.828	168.432
768	ENSG00000203760	CENPW	339.21	-1.03618	0.397611	-2.60601	0.00916039	0.259358	935.82	259.737	614.924	227.855	371.88	326.072	256.297	234.294	115.048	294.147	171.267	263.175
769	ENSG00000185811	IKZF1	325.73	-1.1125	0.42679	-2.60668	0.00914253	0.259358	763.564	218.276	729.278	348.806	414.288	198.677	88.1302	184.969	244.365	317.199	147.508	253.701
770	ENSG00000133561	GIMAP6	758.925	-0.870776	0.334419	-2.60384	0.00921844	0.259358	1035.55	819.451	1411.09	771.742	1327.68	522.474	357.917	502.841	369.223	945.142	502.912	541.088
771	ENSG00000082458	DLG3	555.566	0.780831	0.299584	2.60638	0.00915049	0.259358	263.923	415.823	340.905	606.313	443.647	381.429	916.374	923.473	779.472	639.931	354.414	601.092
772	ENSG00000168060	NAALADL1	137.742	-1.02169	0.39177	-2.60788	0.00911048	0.259358	152.108	131.697	252.443	280.917	206.6	84.1722	68.3459	56.1757	79.3741	179.808	63.359	97.9011
773	ENSG00000226968	LINC00423	3.83234	-3.81373	1.46449	-2.60413	0.00921089	0.259358	1.00734	4.87768	31.2856	2.34098	3.26211	0	0	1.37014	0	1.84418	0	0
774	ENSG00000140030	GPR65	350.005	-1.31159	0.50318	-2.60661	0.00914439	0.259358	843.144	196.327	948.278	412.792	442.559	150.145	74.6409	364.457	164.099	224.068	123.748	255.806
775	ENSG00000103365	GGA2	1349.84	-0.539824	0.207119	-2.60635	0.00915131	0.259358	1537.2	1459.65	1803.78	2068.64	1523.4	1204.19	902.885	983.759	1166.53	1137.86	971.175	1439.04
776	ENSG00000167644	C19orf33	50.1977	2.18552	0.837738	2.60884	0.00908504	0.259358	5.0367	32.9244	4.31526	10.9246	9.78632	45.4985	312.053	26.0326	61.5372	52.5591	39.5994	2.1054
777	ENSG00000231535	LINC00278	108.439	3.40482	1.30592	2.60721	0.00912829	0.259358	45.3303	6.09711	0	23.4098	20.66	16.6828	218.527	21.9222	11.594	0	595.971	341.075
778	ENSG00000215533	LINC00189	6.91118	2.60238	0.999673	2.60323	0.00923502	0.259358	1.00734	0	1.07881	3.90163	3.26211	2.27492	44.0651	5.48055	0	7.37672	3.95994	10.527
779	ENSG00000141959	PFKL	3557.33	0.483737	0.185824	2.6032	0.00923571	0.259358	2467.99	2604.68	2736.95	3279.71	3566.57	3143.19	4845.36	3397.94	4549.3	4424.19	4353.95	3318.11
780	ENSG00000160256	SLX9	530.494	0.76118	0.29177	2.60884	0.00908506	0.259358	511.729	354.852	345.221	451.809	394.715	303.323	863.317	1008.42	420.95	612.268	709.819	389.499
781	ENSG00000285525		6.62543	3.13565	1.20546	2.60121	0.00928965	0.259753	4.02936	0	0	3.90163	0	0	11.6907	10.9611	31.2145	0	2.96995	14.7378
782	ENSG00000225194	LINC00092	7.21721	-1.84317	0.708564	-2.60128	0.00928768	0.259753	8.05873	6.09711	28.0492	10.9246	3.26211	11.3746	0.899288	2.74028	2.67553	5.53254	5.93991	1.0527
783	ENSG00000151208	DLG5	411.847	1.56526	0.601806	2.60094	0.00929688	0.259753	131.962	220.715	173.689	142.8	164.193	414.794	1104.33	253.476	143.587	1740.91	247.496	204.224
784	ENSG00000152766	ANKRD22	136.889	-2.10707	0.810122	-2.60093	0.00929723	0.259753	760.542	26.8273	295.595	117.829	103.3	28.8157	7.1943	91.7992	36.5656	90.3648	5.93991	77.8998
785	ENSG00000284734		70.6265	-1.52081	0.584826	-2.60045	0.00931003	0.259779	91.668	60.9711	255.679	100.662	89.1643	30.3323	7.1943	24.6625	25.8635	37.8057	27.7196	95.7957
786	ENSG00000229672		20.2065	1.58115	0.60868	2.59767	0.00938598	0.261566	1.00734	4.87768	26.9704	5.46228	8.69895	13.6495	21.5829	50.6951	37.4575	40.572	17.8197	13.6851
787	ENSG00000203650	LINC01285	31.1224	1.32864	0.511949	2.59527	0.00945167	0.262499	13.0954	26.8273	28.0492	10.9246	20.66	7.58308	105.217	45.2146	41.9167	16.5976	24.7496	32.6337
788	ENSG00000166311	SMPD1	868.811	0.512685	0.197576	2.59487	0.0094627	0.262499	663.838	681.656	840.396	637.526	807.915	665.794	1247.31	1011.16	972.11	1037.35	1171.15	689.519
789	ENSG00000235410		13.9725	2.69754	1.03976	2.5944	0.00947571	0.262499	4.02936	8.53595	5.39407	1.56065	0	3.03323	3.59715	56.1757	0	65.4684	1.97997	17.8959
790	ENSG00000258824		6.73897	1.63368	0.629833	2.59383	0.00949139	0.262499	1.00734	6.09711	3.23644	0.780326	4.34948	4.54985	17.0865	9.59097	4.45922	9.2209	8.90986	11.5797
791	ENSG00000276231	PIK3R6	58.9249	-1.37015	0.528211	-2.59394	0.00948825	0.262499	241.762	46.338	86.3051	42.1376	66.3295	27.2991	17.9858	24.6625	34.7819	58.0917	27.7196	33.6864
792	ENSG00000149609	C20orf144	5.03511	2.12351	0.818514	2.59435	0.00947709	0.262499	2.01468	0	4.31526	0.780326	1.08737	3.03323	7.1943	2.74028	15.1613	7.37672	1.97997	14.7378
793	ENSG00000150337	FCGR1A	744.195	-1.47933	0.570658	-2.59231	0.00953327	0.263051	2643.26	395.092	2019.54	376.117	692.654	445.885	211.333	633.004	136.452	634.398	292.045	450.556
794	ENSG00000157036	EXOG	98.849	-0.64612	0.249252	-2.59224	0.00953537	0.263051	103.756	93.8954	149.955	103.783	138.096	133.462	90.8281	98.6499	58.8617	62.7021	90.0886	62.1093
795	ENSG00000269220	LINC00528	22.6658	-1.42192	0.548723	-2.59132	0.00956076	0.26342	58.4258	8.53595	65.8077	32.7737	25.0095	7.58308	10.7915	12.3312	13.3777	13.8314	10.8898	12.6324
796	ENSG00000168333	PPDPFL	1070.84	4.78571	1.84725	2.59073	0.00957736	0.263546	0	7.31653	391.61	0	2.17474	48.5317	2329.16	7396	436.112	2235.15	1.97997	2.1054
797	ENSG00000244734	HBB	12176.6	-1.8612	0.718545	-2.59024	0.0095909	0.263587	59022.1	8364.01	32006.3	10746.6	2441.14	2000.42	2035.09	9575.89	4888.2	6885.25	6637.85	1515.89
798	ENSG00000145721	LIX1	43.3499	-4.63383	1.78949	-2.58947	0.00961236	0.263776	1.00734	0	385.137	61.6457	0	52.3233	0	2.74028	7.13475	9.2209	0.989984	0
799	ENSG00000255395		18.5207	-7.15355	2.76292	-2.58913	0.00962184	0.263776	138.006	78.0429	0	0	0	5.30816	0	0	0.891844	0	0	0
800	ENSG00000242048	PRKAG2-AS2	414.09	2.58518	0.999512	2.58645	0.00969714	0.265508	3.02202	217.057	53.9407	29.6524	401.239	5.30816	839.935	624.783	160.532	700.789	1926.51	6.3162
801	ENSG00000171621	SPSB1	514.662	1.5406	0.596036	2.58474	0.00974536	0.26556	494.604	398.751	187.714	52.2818	231.61	215.359	491.011	816.602	333.55	1562.02	1284.01	108.428
802	ENSG00000002746	HECW1	37.4085	3.96145	1.5327	2.58462	0.0097485	0.26556	3.02202	19.5107	0	1.56065	3.26211	0	338.132	47.9548	0	18.4418	13.8598	3.1581
803	ENSG00000023839	ABCC2	658.181	1.07129	0.414299	2.58578	0.00971575	0.26556	184.343	690.192	333.354	294.963	501.277	542.949	648.387	974.168	818.713	1190.42	1423.6	295.809
804	ENSG00000260228	CDH13-AS2	31.2798	-1.49273	0.577697	-2.58392	0.00976838	0.26556	99.7268	30.4855	48.5466	29.6524	50.019	18.1994	1.79858	26.0326	24.0798	15.6755	6.92989	24.2121
805	ENSG00000230613	HM13-AS1	65.0857	1.33	0.514721	2.58392	0.00976837	0.26556	13.0954	81.7012	42.0738	18.7278	20.66	46.2568	54.8566	164.417	55.2943	89.4427	153.448	41.0553
806	ENSG00000100298	APOBEC3H	129.338	-1.1377	0.44039	-2.58339	0.00978334	0.26556	351.562	131.697	268.625	106.124	138.096	70.5226	104.317	135.644	41.9167	69.1568	55.4391	78.9525
807	ENSG00000160213	CSTB	17920.1	0.916314	0.354697	2.58337	0.00978392	0.26556	8439.5	12903.9	16643.9	8106.81	16113.7	12271.7	45656	18209.1	11376.4	26022.3	17513.8	21784.6
808	ENSG00000131351	HAUS8	156.968	-0.57311	0.221968	-2.58195	0.00982435	0.266327	244.784	196.327	195.265	155.285	132.659	201.71	140.289	138.384	98.1028	114.339	130.678	135.798
809	ENSG00000253428	LINC01942	20.8141	2.08754	0.808917	2.58066	0.00986113	0.266505	3.02202	0	18.3398	10.1442	13.0484	3.03323	28.7772	16.4417	25.8635	6.45463	9.89984	114.744
810	ENSG00000256235	SMIM3	1645.15	1.6931	0.656459	2.57914	0.00990464	0.266505	2559.65	559.714	579.323	180.255	212.037	572.523	3189.77	841.265	2440.09	5733.56	2297.75	575.827
811	ENSG00000242147	LASTR	112.759	1.30591	0.506075	2.58046	0.00986687	0.266505	119.874	67.0682	40.9949	25.7508	106.562	29.574	132.195	348.015	79.3741	63.6242	165.327	174.748
812	ENSG00000102858	MGRN1	755.702	0.852202	0.330472	2.57874	0.00991609	0.266505	465.392	751.163	399.161	669.52	425.161	522.474	745.51	974.168	1785.47	999.546	860.296	470.557
813	ENSG00000169877	AHSP	164.694	-4.17091	1.61709	-2.57927	0.00990089	0.266505	1177.58	1.21942	197.423	493.946	0	2.27492	64.7487	13.7014	3.56738	16.5976	0	5.2635
814	ENSG00000133392	MYH11	901.743	1.46442	0.567841	2.57892	0.00991096	0.266505	281.048	308.514	394.846	1011.3	293.59	588.447	482.018	327.463	671.559	3581.4	872.176	2008.55
815	ENSG00000232884		68.9093	-1.49748	0.580461	-2.57981	0.00988535	0.266505	127.932	15.8525	182.32	74.131	135.921	74.3142	44.0651	46.5847	4.45922	61.78	23.7596	35.7918
816	ENSG00000246228	CASC8	15.8337	2.80919	1.09004	2.57713	0.00996238	0.267094	6.04405	4.87768	4.31526	0.780326	3.26211	4.54985	95.3245	30.143	0	38.7278	1.97997	0
817	ENSG00000118557	PMFBP1	15.069	-1.32133	0.512706	-2.57717	0.00996119	0.267094	18.1321	9.75537	19.4187	21.8491	27.1842	32.6072	3.59715	9.59097	12.4858	14.7534	1.97997	9.4743
818	ENSG00000120280	TASL	92.6947	-1.35946	0.527612	-2.57663	0.00997683	0.267155	175.277	112.187	266.467	82.7145	110.912	52.3233	16.1872	87.6888	27.6472	66.3905	19.7997	94.743
819	ENSG00000232807		116.536	1.78841	0.694265	2.57598	0.0099956	0.26733	50.367	58.5322	67.9653	19.5081	76.1158	41.7069	388.492	317.872	17.8369	299.679	27.7196	32.6337
820	ENSG00000162511	LAPTM5	8223.19	-1.01427	0.394065	-2.57387	0.0100569	0.268315	17220.5	5754.45	17874.9	9195.36	10382.2	5575.08	3191.57	4473.5	5034.46	10283.1	4106.46	5586.68
821	ENSG00000188603	CLN3	8.50777	-1.53597	0.596731	-2.57398	0.0100537	0.268315	12.0881	8.53595	12.9458	7.80326	23.9221	10.6163	5.39573	5.48055	7.13475	0	3.95994	4.2108
822	ENSG00000116667	C1orf21	522.018	1.96567	0.764538	2.57105	0.010139	0.269848	243.777	226.812	193.108	267.652	201.163	144.079	340.83	3358.21	42.8085	981.104	142.558	122.113
823	ENSG00000201882		4.54637	-2.22491	0.865291	-2.57129	0.010132	0.269848	5.0367	12.1942	2.15763	10.9246	6.52422	7.58308	0.899288	5.48055	0	2.76627	0.989984	0
824	ENSG00000286050		31.554	7.49305	2.91557	2.57001	0.0101694	0.270329	0	0	0	1.56065	0	0	74.6409	0	0	0	294.025	8.4216
825	ENSG00000111801	BTN3A3	986.871	-0.946086	0.368301	-2.56878	0.0102056	0.270962	1438.48	902.372	1775.73	1568.46	1469.04	642.287	307.557	424.743	676.91	912.869	619.73	1104.28
826	ENSG00000102043	MTMR8	22.7392	-1.4993	0.584083	-2.56693	0.0102605	0.272089	75.5506	23.169	48.5466	17.1672	11.9611	25.0242	14.3886	13.7014	12.4858	2.76627	4.94992	23.1594
827	ENSG00000075643	MOCOS	102.448	2.24538	0.875077	2.56592	0.0102903	0.272551	91.668	31.7049	47.4678	3.1213	9.78632	30.3323	214.93	649.445	37.4575	78.3777	27.7196	7.3689
828	ENSG00000172478	MAB21L4	22.9965	5.15807	2.01249	2.56302	0.0103765	0.274501	0	0	0	0	7.61158	0	0.899288	82.2083	9.81028	0	155.428	20.0013
829	ENSG00000012171	SEMA3B	318.123	1.72142	0.671931	2.5619	0.0104102	0.274877	52.3817	123.162	60.4136	144.36	138.096	369.296	594.429	779.608	470.894	683.269	391.044	10.527
830	ENSG00000164611	PTTG1	872.7	-1.38084	0.53903	-2.56171	0.0104158	0.274877	3597.21	574.347	1825.35	570.418	451.258	548.257	339.931	456.256	398.654	729.373	262.346	718.994
831	ENSG00000204516	MICB	131.751	-1.05101	0.410392	-2.561	0.010437	0.275106	326.378	174.377	259.994	131.875	57.6306	116.021	80.9359	110.981	72.2394	123.56	55.4391	71.5836
832	ENSG00000163568	AIM2	75.0865	-1.63206	0.637502	-2.56009	0.0104645	0.275183	322.349	43.8992	163.98	76.4719	41.32	32.6072	11.6907	76.7277	33.8901	30.429	11.8798	55.7931
833	ENSG00000169100	SLC25A6	19518.4	0.866293	0.338503	2.55919	0.0104916	0.275183	19146.5	18749.8	15517.7	7893	11525	10137.8	25521.8	32639.4	15943.5	12519.2	31736.9	32889.5
834	ENSG00000179715	PCED1B	271.346	-1.25433	0.490182	-2.5589	0.0105004	0.275183	621.529	165.841	814.505	284.039	244.658	163.795	151.08	172.637	77.5904	269.25	72.2689	218.962
835	ENSG00000010610	CD4	1220.13	-0.924344	0.361238	-2.55882	0.0105028	0.275183	2627.15	656.049	2297.87	1370.25	1707.17	930.444	553.062	865.927	909.681	1081.61	629.63	1012.7
836	ENSG00000091583	APOH	33.3319	2.65698	1.03807	2.55954	0.0104812	0.275183	18.1321	0	3.23644	6.24261	27.1842	0	24.2808	157.566	3.56738	64.5463	92.0685	3.1581
837	ENSG00000171608	PIK3CD	389.216	-1.04828	0.409754	-2.55833	0.0105177	0.275245	582.243	247.542	831.766	758.477	383.841	344.272	98.9217	234.294	314.821	372.524	153.448	348.444
838	ENSG00000211452	DIO1	12.557	2.75796	1.0785	2.55721	0.0105516	0.275421	0	4.87768	4.31526	0.780326	9.78632	0	14.3886	8.22083	0.891844	1.84418	78.2088	27.3702
839	ENSG00000043591	ADRB1	4.12103	-2.50574	0.980006	-2.55686	0.0105622	0.275421	4.02936	9.75537	2.15763	14.8262	3.26211	7.58308	0	4.11041	2.67553	0	0	1.0527
840	ENSG00000178999	AURKB	198.517	-1.18072	0.461674	-2.55748	0.0105435	0.275421	703.124	131.697	264.309	235.658	130.484	188.06	109.713	86.3187	121.291	228.678	71.2789	111.586
841	ENSG00000247774	PCED1B-AS1	1073.13	-1.28836	0.504118	-2.55566	0.0105986	0.276043	2255.44	780.429	3293.62	898.935	1129.78	778.024	142.088	1016.64	411.14	807.751	492.022	871.636
842	ENSG00000125354	SEPTIN6	453.328	-1.07438	0.420554	-2.55467	0.0106289	0.276175	1288.39	214.618	894.337	599.29	354.482	337.447	301.261	249.365	296.984	377.135	195.027	331.601
843	ENSG00000267282		22.8236	1.37825	0.539451	2.55492	0.0106213	0.276175	22.1615	3.65826	15.1034	14.8262	5.43685	14.4079	13.4893	28.7729	32.1064	21.2081	23.7596	78.9525
844	ENSG00000225721		9.38016	1.49056	0.583825	2.55309	0.0106771	0.277098	2.01468	6.09711	9.70933	7.80326	0	3.79154	10.7915	17.8118	11.594	19.3639	9.89984	13.6851
845	ENSG00000138030	KHK	7475.61	1.59962	0.626892	2.55167	0.0107208	0.277576	1473.74	10645.5	1586.94	2405.74	4403.85	1741.08	3155.6	27434.3	6024.41	5731.71	20228.4	4876.11
846	ENSG00000178623	GPR35	240.859	1.72644	0.676578	2.55172	0.0107191	0.277576	234.71	137.795	33.4432	36.6753	189.202	39.432	276.081	231.553	898.979	40.572	627.65	144.22
847	ENSG00000165168	CYBB	1038.4	-1.07355	0.420881	-2.55072	0.0107502	0.278007	2197.01	742.627	2180.28	910.64	1558.2	858.405	253.599	631.634	503	1090.83	502.912	1031.65
848	ENSG00000162433	AK4	3047.27	0.761391	0.2986	2.54987	0.0107764	0.27803	2245.36	2471.77	1810.25	1973.44	3257.76	1810.08	4049.49	3921.33	5000.57	3023.53	5233.06	1770.64
849	ENSG00000239636	TFAP2E-AS1	47.4808	-1.23893	0.485853	-2.55001	0.0107719	0.27803	88.646	15.8525	155.349	49.9409	39.1453	51.5649	32.3744	21.9222	33.8901	36.8836	16.8297	27.3702
850	ENSG00000142599	RERE	1942.61	0.701243	0.275169	2.54841	0.0108214	0.278534	1189.67	1248.69	1256.82	1786.17	2245.42	1151.11	2139.41	1990.81	2576.54	3747.37	2225.48	1753.8
851	ENSG00000116701	NCF2	271.722	-1.09847	0.431026	-2.54849	0.0108189	0.278534	581.236	260.956	529.698	302.766	404.501	144.079	112.411	71.2472	226.528	142.002	150.478	334.759
852	ENSG00000141527	CARD14	83.5535	2.61491	1.0265	2.5474	0.0108529	0.278766	69.5065	2.43884	48.5466	6.24261	1.08737	12.8912	237.412	348.015	15.1613	249.886	1.97997	9.4743
853	ENSG00000096996	IL12RB1	137.529	-1.37163	0.538465	-2.5473	0.0108559	0.278766	341.489	69.507	370.033	163.088	164.193	81.8973	19.7843	80.8381	72.2394	112.495	32.6695	142.115
854	ENSG00000154274	C4orf19	294.002	0.859192	0.33765	2.54463	0.0109395	0.280501	131.962	213.399	144.561	273.894	253.357	235.834	198.743	460.366	313.929	301.523	675.169	325.284
855	ENSG00000180712	LINC02363	56.5896	-1.86118	0.731504	-2.54432	0.0109491	0.280501	264.931	47.5574	129.458	56.9638	16.3105	17.4411	3.59715	9.59097	28.539	35.9615	11.8798	56.8458
856	ENSG00000147724	FAM135B	27.1219	2.37912	0.936185	2.5413	0.0110442	0.282609	5.0367	0	37.7585	0	2.17474	7.58308	7.1943	104.13	57.9699	25.8185	51.4792	26.3175
857	ENSG00000226822	LINC02785	18.0872	-1.56051	0.614418	-2.53983	0.0110908	0.283397	25.1835	29.2661	37.7585	16.3868	50.019	3.79154	2.69786	4.11041	9.81028	6.45463	16.8297	14.7378
858	ENSG00000225548	LINC01980	19.2579	-2.62361	1.03312	-2.53951	0.0111009	0.283397	66.4845	4.87768	66.8865	49.9409	7.61158	3.03323	1.79858	1.37014	0	10.143	0	18.9486
859	ENSG00000074416	MGLL	3801.62	0.982047	0.386828	2.53872	0.011126	0.283706	2025.76	2446.16	1772.49	2848.19	3070.73	3169.73	12328.3	2714.24	4187.21	3825.75	4040.13	3190.73
860	ENSG00000115129	TP53I3	1835.08	1.10379	0.435389	2.53518	0.0112388	0.283939	852.21	1560.86	995.745	892.693	1390.75	1300.5	2185.27	3347.25	2267.07	2931.32	3918.36	378.972
861	ENSG00000280721	LINC01943	211.239	-1.57959	0.622986	-2.53551	0.0112284	0.283939	652.757	146.331	639.737	206.786	86.9895	166.828	49.4608	104.13	24.0798	293.225	61.379	103.165
862	ENSG00000185261	KIAA0825	89.7283	-0.677861	0.2673	-2.53595	0.0112141	0.283939	104.763	118.284	146.719	85.0555	89.1643	118.296	46.763	72.6173	71.3475	50.715	77.2188	95.7957
863	ENSG00000118513	MYB	17.1523	-2.19445	0.865325	-2.53598	0.0112132	0.283939	61.4478	2.43884	47.4678	21.8491	10.8737	25.0242	3.59715	0	5.35106	11.9872	0	15.7905
864	ENSG00000146966	DENND2A	311.543	1.37354	0.541756	2.53535	0.0112336	0.283939	315.298	141.453	80.9111	117.829	255.532	130.429	1127.71	237.034	197.098	753.348	153.448	228.436
865	ENSG00000072110	ACTN1	2459.03	1.11169	0.438315	2.53629	0.0112035	0.283939	1698.38	1570.61	1649.51	1346.06	1233.08	1837.38	4257.23	4716.01	1099.64	6402.07	2737.31	961.115
866	ENSG00000197361	FBXL22	62.0226	1.13868	0.448824	2.53704	0.0111795	0.283939	39.2863	19.5107	28.0492	46.0392	58.7179	40.9486	166.368	30.143	136.452	54.4033	64.349	60.0039
867	ENSG00000176390	CRLF3	313.287	-0.726454	0.286378	-2.53669	0.0111905	0.283939	537.92	202.424	516.752	368.314	362.094	354.888	196.944	309.651	243.473	251.731	158.397	256.859
868	ENSG00000250634	LINC01182	21.6311	2.64129	1.04265	2.53325	0.0113009	0.285179	8.05873	9.75537	6.47288	3.90163	0	7.58308	16.1872	161.676	8.91844	35.0394	1.97997	0
869	ENSG00000138964	PARVG	769.73	-1.10192	0.435351	-2.53111	0.0113703	0.2866	1830.34	462.161	1973.15	738.969	750.285	545.982	205.038	631.634	538.674	642.697	384.114	533.719
870	ENSG00000223803	RPS20P14	19.1859	-1.3153	0.519858	-2.53011	0.0114026	0.287084	21.1542	21.9496	15.1034	21.0688	72.8537	12.1329	8.99288	12.3312	6.24291	14.7534	8.90986	14.7378
871	ENSG00000258527	ASB9P1	82.637	2.81302	1.11267	2.52818	0.0114656	0.288339	22.1615	68.2876	20.4975	3.1213	9.78632	0	5.39573	691.92	104.346	50.715	5.93991	9.4743
872	ENSG00000171551	ECEL1	11.7233	-3.16315	1.25147	-2.52754	0.0114866	0.288376	58.4258	0	25.8915	0.780326	39.1453	2.27492	3.59715	4.11041	0	6.45463	0	0
873	ENSG00000257497	GLIPR1-AS1	34.2432	1.33735	0.529157	2.52733	0.0114934	0.288376	9.06607	13.4136	25.8915	21.0688	11.9611	34.8822	127.699	16.4417	30.3227	49.7929	35.6394	34.7391
874	ENSG00000173578	XCR1	62.8571	-1.75588	0.695141	-2.52593	0.0115393	0.289196	229.674	3.65826	92.778	82.7145	130.484	42.4652	16.1872	34.2534	9.81028	50.715	8.90986	52.635
875	ENSG00000232352	SEMA3B-AS1	16.1437	2.30088	0.911058	2.52551	0.0115531	0.289212	3.02202	2.43884	21.5763	2.34098	1.08737	2.27492	32.3744	95.9097	7.13475	17.5197	5.93991	2.1054
876	ENSG00000172456	FGGY	1164.62	1.14134	0.452146	2.52427	0.011594	0.289291	797.814	1732.8	437.999	371.435	605.665	414.794	2066.56	1298.89	1493.84	626.099	2745.23	1384.3
877	ENSG00000248144	ADH1C	9.68683	3.91642	1.55257	2.52254	0.0116511	0.289291	0	0	0	0.780326	6.52422	0	31.4751	61.6562	0	14.7534	0	1.0527
878	ENSG00000113263	ITK	85.2919	-1.0923	0.432949	-2.52293	0.0116381	0.289291	164.197	73.1653	212.526	105.344	84.8148	56.8731	17.9858	42.4743	49.0514	82.066	62.369	72.6363
879	ENSG00000111913	RIPOR2	231.016	-1.04168	0.412799	-2.52345	0.0116211	0.289291	590.302	236.568	275.098	308.229	293.59	162.278	76.4395	87.6888	128.426	193.639	117.808	302.125
880	ENSG00000110446	SLC15A3	1368.95	-0.774876	0.307221	-2.52221	0.011662	0.289291	2375.31	859.692	2400.36	1218.09	2293.26	1221.63	922.67	941.285	1312.79	880.596	905.836	1095.86
881	ENSG00000167588	GPD1	1433.35	1.6649	0.659845	2.52317	0.0116301	0.289291	164.197	1017	277.255	450.248	1658.24	557.356	2761.71	1260.53	3010.87	352.238	5222.17	468.452
882	ENSG00000167984	NLRC3	91.5003	-1.08025	0.428242	-2.52252	0.0116518	0.289291	148.079	91.4566	224.393	142.019	77.2032	62.9396	36.8708	27.4028	84.7252	90.3648	34.6495	77.8998
883	ENSG00000232528		7.97216	-2.28579	0.90583	-2.52342	0.0116218	0.289291	45.3303	18.2913	3.23644	3.90163	3.26211	5.30816	0	4.11041	2.67553	6.45463	0.989984	2.1054
884	ENSG00000121594	CD80	23.5773	-1.50493	0.597016	-2.52076	0.0117103	0.289832	103.756	10.9748	24.8127	32.7737	15.2232	21.2326	5.39573	16.4417	7.13475	10.143	11.8798	23.1594
885	ENSG00000170571	EMB	307.458	-1.09565	0.434634	-2.52085	0.0117072	0.289832	710.175	191.449	694.756	394.065	318.599	204.743	89.9288	139.754	222.069	361.459	160.377	202.118
886	ENSG00000235706	DICER1-AS1	200.388	0.766018	0.304219	2.51798	0.0118029	0.291796	93.6827	221.935	135.931	121.731	155.494	162.278	310.254	220.592	281.823	143.846	196.017	361.076
887	ENSG00000121005	CRISPLD1	17.7803	-1.10953	0.440783	-2.51717	0.01183	0.291807	17.1248	32.9244	25.8915	35.1147	16.3105	18.1994	18.885	16.4417	6.24291	11.0651	9.89984	5.2635
888	ENSG00000102802	MEDAG	114.595	1.2835	0.509859	2.51736	0.011824	0.291807	64.4698	71.9458	63.65	103.003	33.7084	62.9396	109.713	404.191	85.617	218.535	124.738	32.6337
889	ENSG00000224376		39.3158	-1.12357	0.446634	-2.51563	0.011882	0.292102	52.3817	35.3632	100.33	60.0851	27.1842	47.7734	6.29502	28.7729	37.4575	25.8185	19.7997	30.5283
890	ENSG00000188536	HBA2	9730.56	-1.58912	0.631571	-2.51614	0.0118649	0.292102	44048	7717.72	20835.1	9891.41	3231.66	1913.97	2855.24	7748.13	4646.51	5444.02	6503.21	1931.7
891	ENSG00000100196	KDELR3	481.568	1.23439	0.490684	2.51564	0.0118815	0.292102	493.597	90.2372	148.876	408.891	247.92	333.656	1554.87	412.412	838.333	493.318	468.263	288.44
892	ENSG00000230402	LINC01349	14.2697	2.26699	0.901867	2.51366	0.0119485	0.292228	8.05873	1.21942	8.63051	4.68196	5.43685	1.51662	35.0722	8.22083	31.2145	0	2.96995	64.2147
893	ENSG00000133302	SLF1	134.618	-0.87141	0.346553	-2.51451	0.0119199	0.292228	261.909	80.4818	266.467	191.96	88.0769	155.453	101.62	84.9486	83.8333	83.9102	117.808	98.9538
894	ENSG00000242574	HLA-DMB	1613.19	-0.954627	0.379608	-2.51477	0.0119109	0.292228	2862.86	1393.8	3188.97	1872	2239.98	1212.53	412.773	690.55	1401.98	1662.53	1293.91	1126.39
895	ENSG00000218672	LINC03010	3.48223	5.27171	2.09727	2.51361	0.0119502	0.292228	0	0	0	0	0	0	0	31.5132	0	9.2209	0	1.0527
896	ENSG00000104635	SLC39A14	4625.42	1.62047	0.644706	2.51351	0.0119538	0.292228	2219.17	4054.57	3657.18	596.169	1632.14	1462.78	2389.41	18161.2	5270.8	11145.3	4316.33	600.039
897	ENSG00000186312	CA5BP1	207.968	0.702646	0.279636	2.51271	0.0119808	0.292432	144.05	96.3343	184.477	171.672	169.63	182.752	292.269	305.541	305.011	129.093	282.146	232.647
898	ENSG00000141753	IGFBP4	16203.8	0.945297	0.376242	2.51247	0.0119888	0.292432	5283.5	13127.1	6724.25	11458.3	15700.5	14170.5	29356.4	18026.9	24528.4	30327.5	17333.6	8408.97
899	ENSG00000189060	H1-0	2524.58	1.06791	0.425152	2.51182	0.012011	0.292646	711.183	1196.25	1129.52	1519.29	2973.95	2252.93	1878.61	7078.13	1925.49	3648.71	2866.99	3113.89
900	ENSG00000288073		11.3819	1.93969	0.772966	2.50941	0.0120933	0.293346	1.00734	7.31653	1.07881	5.46228	6.52422	6.82477	10.7915	4.11041	4.45922	7.37672	57.4191	24.2121
901	ENSG00000286839		3.43565	4.73144	1.8853	2.50965	0.0120852	0.293346	1.00734	0	0	0	0	0	4.49644	31.5132	0	0	0	4.2108
902	ENSG00000166250	CLMP	65.2108	4.72751	1.88344	2.51004	0.0120718	0.293346	19.1395	0	2.15763	3.90163	3.26211	0	24.2808	390.489	0.891844	338.407	0	0
903	ENSG00000275173		80.2116	1.49552	0.595854	2.50988	0.0120771	0.293346	42.3083	71.9458	72.2805	22.6295	34.7958	8.34139	44.9644	341.164	131.101	62.7021	53.4592	76.8471
904	ENSG00000188158	NHS	249.612	1.03702	0.413377	2.50865	0.0121194	0.293654	177.292	143.892	72.2805	171.672	145.707	269.958	532.379	379.528	353.17	195.483	444.503	109.481
905	ENSG00000287218		23.1454	1.36109	0.542897	2.50709	0.0121729	0.294624	13.0954	19.5107	22.6551	9.36391	9.78632	3.79154	17.9858	57.5458	23.1879	16.5976	66.329	17.8959
906	ENSG00000173457	PPP1R14B	1874.64	0.634795	0.253265	2.50645	0.0121951	0.294784	1297.46	1691.34	1329.1	1837.67	1230.9	1426.38	2275.2	1829.13	2770.96	3082.55	2450.21	1274.82
907	ENSG00000205181	LINC00654	36.3955	1.65245	0.659364	2.50612	0.0122064	0.294784	21.1542	6.09711	19.4187	36.6753	6.52422	15.1662	151.08	42.4743	29.4309	46.1045	58.4091	4.2108
908	ENSG00000177807	KCNJ10	32.4647	-2.22448	0.887902	-2.50532	0.0122342	0.294848	109.8	4.87768	107.881	32.7737	42.4074	23.5075	44.0651	1.37014	6.24291	0.92209	0.989984	14.7378
909	ENSG00000115718	PROC	51.6526	-1.86333	0.744026	-2.50438	0.0122666	0.294848	75.5506	159.744	122.985	19.5081	26.0969	82.6556	11.6907	8.22083	62.4291	0.92209	7.91987	42.108
910	ENSG00000081818	PCDHB4	85.2346	1.55268	0.620055	2.5041	0.0122764	0.294848	15.1101	80.4818	31.2856	38.236	53.2811	41.7069	259.894	283.619	20.5124	68.2347	100.978	29.4756
911	ENSG00000103089	FA2H	18.2737	1.88608	0.753013	2.50471	0.0122553	0.294848	1.00734	15.8525	10.7881	5.46228	8.69895	5.30816	66.5473	13.7014	4.45922	6.45463	67.3189	13.6851
912	ENSG00000233483	EFCAB15P	472.196	1.51465	0.60476	2.50455	0.0122607	0.294848	195.424	112.187	425.053	263.75	344.696	128.154	2461.35	353.496	408.465	210.237	210.867	552.668
913	ENSG00000287627		42.3933	4.45206	1.77843	2.50336	0.0123019	0.294849	1.00734	6.09711	7.5517	5.46228	2.17474	0	0	0	26.7553	0	371.244	88.4268
914	ENSG00000204923	FBXO48	243.876	0.756487	0.302221	2.5031	0.0123112	0.294849	227.659	170.719	194.187	160.747	165.28	169.861	527.882	264.437	237.231	201.016	197.997	409.5
915	ENSG00000120436	GPR31	9.67338	-2.3391	0.93454	-2.50294	0.0123168	0.294849	39.2863	4.87768	16.1822	7.80326	25.0095	3.79154	0	1.37014	6.24291	0	0.989984	10.527
916	ENSG00000258913	LINC02691	18.0688	2.92951	1.17067	2.50241	0.0123351	0.294966	1.00734	0	0	21.0688	1.08737	1.51662	0	20.5521	27.6472	5.53254	58.4091	80.0052
917	ENSG00000211695	TRGV9	14.4005	-1.505	0.601529	-2.50195	0.012351	0.295024	19.1395	15.8525	45.3102	4.68196	16.3105	25.7825	6.29502	17.8118	3.56738	2.76627	7.91987	7.3689
918	ENSG00000145708	CRHBP	24.8334	-1.3175	0.526807	-2.50092	0.0123873	0.295461	11.0808	32.9244	52.8619	17.9475	57.6306	40.1903	16.1872	12.3312	3.56738	11.9872	12.8698	28.4229
919	ENSG00000111834	RSPH4A	4.83464	-2.05306	0.821006	-2.50066	0.0123963	0.295461	7.05139	6.09711	6.47288	4.68196	5.43685	16.6828	0	4.11041	0.891844	4.61045	1.97997	0
920	ENSG00000138741	TRPC3	5.30521	2.45346	0.981771	2.49902	0.0124538	0.296509	3.02202	0	3.23644	0	2.17474	1.51662	8.99288	5.48055	8.0266	24.8964	0	6.3162
921	ENSG00000272341		49.4943	-0.883551	0.353739	-2.49775	0.0124983	0.297246	64.4698	71.9458	72.2805	59.3048	27.1842	90.2387	33.2737	28.7729	47.2677	38.7278	42.5693	17.8959
922	ENSG00000237233	TMEM26-AS1	10.2427	-1.66014	0.664926	-2.49672	0.0125347	0.297525	13.0954	9.75537	43.1526	2.34098	9.78632	15.1662	1.79858	6.85069	5.35106	6.45463	4.94992	4.2108
923	ENSG00000196109	ZNF676	11.0004	-2.78944	1.11727	-2.49665	0.0125372	0.297525	5.0367	65.8487	2.15763	2.34098	39.1453	0.758308	0	2.74028	1.78369	0	6.92989	5.2635
924	ENSG00000163492	CCDC141	21.8649	-1.75151	0.701663	-2.49622	0.0125524	0.297563	65.4772	9.75537	34.5221	56.9638	20.66	14.4079	0.899288	19.1819	1.78369	21.2081	5.93991	11.5797
925	ENSG00000169495	HTRA4	21.5857	-1.86633	0.74784	-2.49564	0.0125732	0.297733	47.345	2.43884	51.7831	41.3573	55.4558	5.30816	23.3815	2.74028	14.2695	4.61045	2.96995	7.3689
926	ENSG00000128285	MCHR1	242.235	-2.4604	0.986514	-2.49404	0.01263	0.298755	1394.16	2.43884	51.7831	680.444	26.0969	304.84	100.72	104.13	142.695	8.29881	5.93991	85.2687
927	ENSG00000288046		40.3296	1.70331	0.683889	2.49062	0.012752	0.300071	10.0734	34.1438	6.47288	6.24261	51.1064	6.06646	9.89217	158.936	49.9433	64.5463	46.5293	40.0026
928	ENSG00000237649	KIFC1	89.2978	-1.01982	0.409472	-2.49056	0.0127541	0.300071	252.843	67.0682	129.458	90.5178	77.2032	100.855	36.8708	36.9937	43.7004	100.508	70.2889	65.2674
929	ENSG00000273024	INTS4P2	3.36937	-2.16546	0.869103	-2.49161	0.0127167	0.300071	6.04405	3.65826	6.47288	7.80326	3.26211	5.30816	1.79858	4.11041	0	0.92209	0	1.0527
930	ENSG00000215018	COL28A1	39.2187	2.03446	0.816694	2.49109	0.0127353	0.300071	8.05873	23.169	42.0738	3.90163	3.26211	12.1329	20.6836	124.683	34.7819	179.808	13.8598	4.2108
931	ENSG00000122122	SASH3	18.8569	-1.14339	0.458858	-2.49181	0.0127094	0.300071	43.3157	13.4136	30.2068	28.8721	27.1842	12.8912	5.39573	10.9611	20.5124	11.9872	8.90986	12.6324
932	ENSG00000128713	HOXD11	58.733	2.43904	0.979954	2.48893	0.0128127	0.301126	0	13.4136	36.6797	15.6065	30.4463	13.6495	18.885	201.41	8.0266	349.472	10.8898	6.3162
933	ENSG00000057294	PKP2	319.051	1.31422	0.52821	2.48807	0.0128438	0.301534	97.7121	342.657	192.029	108.465	181.591	175.927	100.72	791.94	425.41	684.191	622.7	105.27
934	ENSG00000247679		25.2193	1.28275	0.515726	2.48726	0.0128731	0.301574	22.1615	3.65826	11.867	24.9704	9.78632	15.1662	67.4466	35.6236	53.5106	16.5976	20.7897	21.054
935	ENSG00000175463	TBC1D10C	263.572	-1.2037	0.48389	-2.48756	0.0128624	0.301574	533.891	147.55	585.796	566.517	221.823	150.145	89.0295	80.8381	166.775	322.732	101.968	195.802
936	ENSG00000174842	GLMN	131.588	-0.749859	0.301623	-2.48608	0.012916	0.30197	224.637	129.259	185.556	184.937	130.484	134.221	49.4608	142.494	114.156	73.7672	106.918	103.165
937	ENSG00000164251	F2RL1	853.448	1.02581	0.412628	2.48603	0.0129176	0.30197	202.476	803.598	498.412	868.503	468.656	531.574	2255.41	1137.21	753.608	1209.78	973.155	538.982
938	ENSG00000198216	CACNA1E	61.9828	1.78247	0.71769	2.48362	0.0130056	0.303206	69.5065	35.3632	0	24.9704	25.0095	12.8912	147.483	38.3639	119.507	25.8185	189.087	55.7931
939	ENSG00000143390	RFX5	594.297	-0.690658	0.278232	-2.48231	0.0130532	0.303206	747.447	488.988	1087.44	891.913	677.431	510.341	321.046	427.483	665.316	469.344	406.884	437.923
940	ENSG00000170279	C7orf33	3.46864	-5.22281	2.10384	-2.48251	0.0130462	0.303206	32.2349	0	8.63051	0	0	0.758308	0	0	0	0	0	0
941	ENSG00000106952	TNFSF8	133.876	-1.05564	0.425223	-2.48256	0.0130441	0.303206	188.373	89.0177	360.324	150.603	203.338	93.2719	34.1729	87.6888	128.426	126.326	71.2789	73.689
942	ENSG00000206177	HBM	70.9353	-4.18654	1.6863	-2.48268	0.0130398	0.303206	457.333	7.31653	125.142	216.15	1.08737	0	32.3744	2.74028	8.0266	0	0	1.0527
943	ENSG00000179094	PER1	1383.15	1.07863	0.434527	2.48231	0.0130535	0.303206	1359.91	724.336	419.659	689.028	697.004	1443.06	1972.14	2097.68	2124.37	2612.28	2056.2	402.131
944	ENSG00000198019	FCGR1BP	215.818	-1.45398	0.586212	-2.48031	0.013127	0.303563	729.315	98.7731	566.377	224.734	178.329	99.3384	28.7772	194.56	112.372	153.989	48.5092	154.747
945	ENSG00000222017		10.4234	-2.63441	1.06181	-2.48107	0.013099	0.303563	40.2936	37.8021	6.47288	0.780326	16.3105	6.06646	0	2.74028	0	8.29881	0	6.3162
946	ENSG00000170011	MYRIP	32.0633	1.35663	0.547107	2.47964	0.0131515	0.303563	8.05873	37.8021	17.261	15.6065	10.8737	18.9577	38.6694	15.0715	36.5656	46.1045	119.788	20.0013
947	ENSG00000285749		8.57251	-6.52896	2.63256	-2.48008	0.0131351	0.303563	83.6093	1.21942	17.261	0.780326	0	0	0	0	0	0	0	0
948	ENSG00000181652	ATG9B	61.7219	2.51529	1.01439	2.47962	0.0131524	0.303563	25.1835	51.2157	12.9458	4.68196	11.9611	4.54985	10.7915	404.191	10.7021	198.249	1.97997	4.2108
949	ENSG00000212766	EWSAT1	18.3067	1.87008	0.754293	2.47925	0.0131659	0.303563	6.04405	12.1942	7.5517	7.80326	2.17474	11.3746	91.7274	38.3639	9.81028	14.7534	16.8297	1.0527
950	ENSG00000229005	HNF4A-AS1	4.99306	3.4249	1.38033	2.48122	0.0130933	0.303563	0	1.21942	0	0	3.26211	0.758308	0	16.4417	28.539	2.76627	6.92989	0
951	ENSG00000124257	NEURL2	95.8932	1.16185	0.468724	2.47876	0.0131841	0.303663	44.323	104.87	48.5466	28.8721	59.8053	69.006	36.8708	274.028	74.0231	123.56	175.227	111.586
952	ENSG00000203685	STUM	50.9341	2.77616	1.12095	2.47662	0.0132633	0.303917	0	40.2409	10.7881	9.36391	16.3105	1.51662	2.69786	0	57.078	23.0523	338.575	111.586
953	ENSG00000146409	SLC18B1	253.681	-0.759764	0.30672	-2.47706	0.0132469	0.303917	314.29	225.593	463.89	260.629	296.852	353.372	271.585	130.163	144.479	289.536	131.668	162.116
954	ENSG00000248599	FLJ42969	4.00655	3.12411	1.2607	2.47808	0.0132093	0.303917	2.01468	0	2.15763	0.780326	0	0	14.3886	20.5521	5.35106	1.84418	0.989984	0
955	ENSG00000108700	CCL8	200.127	-1.57895	0.63733	-2.47744	0.013233	0.303917	123.903	412.164	463.89	85.8359	125.047	588.447	139.39	47.9548	24.0798	71.0009	36.6294	283.176
956	ENSG00000265962	GACAT2	615.652	2.47312	0.998601	2.47659	0.0132645	0.303917	270.975	98.7731	278.334	70.2293	33.7084	375.362	1082.74	8.22083	219.394	52.5591	4813.3	84.216
957	ENSG00000203565		4.84851	2.78541	1.12499	2.47595	0.0132883	0.304145	1.00734	4.87768	1.07881	0	0	0.758308	15.2879	1.37014	2.67553	2.76627	0.989984	27.3702
958	ENSG00000143443	C1orf56	148.094	0.727277	0.293943	2.47421	0.0133533	0.304895	88.646	78.0429	128.379	163.868	109.824	99.3384	127.699	221.962	115.048	216.691	179.187	248.437
959	ENSG00000255085		5.67687	2.33384	0.94322	2.47433	0.0133485	0.304895	1.00734	0	0	3.1213	2.17474	4.54985	17.9858	2.74028	3.56738	3.68836	2.96995	26.3175
960	ENSG00000211790	TRAV8-4	26.1455	-1.48618	0.600744	-2.4739	0.0133647	0.304895	56.4111	40.2409	33.4432	3.1213	71.7664	26.5408	5.39573	8.22083	11.594	16.5976	26.7296	13.6851
961	ENSG00000268650		47.1702	1.21891	0.492773	2.47358	0.0133767	0.304895	24.1762	20.7302	43.1526	32.7737	25.0095	24.2659	59.353	50.6951	92.7518	67.3126	7.91987	117.902
962	ENSG00000287370		15.8611	1.98788	0.80387	2.47289	0.0134024	0.305162	1.00734	3.65826	22.6551	3.1213	6.52422	1.51662	12.59	60.2861	7.13475	5.53254	16.8297	49.4769
963	ENSG00000099834	CDHR5	2904.52	1.29297	0.523129	2.47161	0.0134506	0.305941	261.909	2520.54	467.127	2441.64	2328.06	2082.31	2991.03	4056.98	3910.74	3303.85	7944.62	2545.43
964	ENSG00000138823	MTTP	22.7234	2.31241	0.935746	2.4712	0.0134662	0.30597	10.0734	8.53595	5.39407	17.1672	2.17474	2.27492	2.69786	30.143	11.594	166.898	0.989984	14.7378
965	ENSG00000113248	PCDHB15	104.024	-1.85504	0.751127	-2.46968	0.0135234	0.30597	374.731	12.1942	36.6797	98.3211	430.598	25.0242	35.0722	97.2798	16.0532	59.0138	30.6895	32.6337
966	ENSG00000277631	PGM5P3-AS1	7.32737	-3.34833	1.35595	-2.46936	0.0135356	0.30597	2.01468	14.6331	0	1.56065	54.3685	7.58308	0	0	0	4.61045	0	3.1581
967	ENSG00000241839	PLEKHO2	957.849	-0.81295	0.329063	-2.4705	0.0134925	0.30597	1461.65	662.146	1485.53	1222.77	1631.05	862.196	526.983	522.023	724.177	1213.47	448.463	733.732
968	ENSG00000279713		13.6952	2.91833	1.18154	2.46994	0.0135135	0.30597	5.0367	0	3.23644	2.34098	8.69895	0	0.899288	23.2923	10.7021	104.196	5.93991	0
969	ENSG00000100104	SRRD	503.402	0.668321	0.270541	2.47032	0.0134994	0.30597	464.384	498.743	330.117	273.114	337.084	429.961	455.04	669.997	503.892	806.829	847.427	424.238
970	ENSG00000184293	CLECL1	257.042	-1.79767	0.728301	-2.4683	0.0135755	0.306554	988.201	152.428	765.958	52.2818	306.638	129.671	22.4822	242.514	150.722	204.704	25.7396	43.1607
971	ENSG00000248874	LINC02899	3.68219	-3.80688	1.54278	-2.46755	0.0136042	0.306887	0	1.21942	1.07881	26.5311	6.52422	6.06646	0	0	0	2.76627	0	0
972	ENSG00000189350	TOGARAM2	19.5633	-1.54719	0.627221	-2.46673	0.0136352	0.306954	33.2423	21.9496	56.0983	42.9179	10.8737	9.858	1.79858	9.59097	7.13475	25.8185	4.94992	10.527
973	ENSG00000099822	HCN2	3.71556	-1.99166	0.80738	-2.46682	0.0136317	0.306954	2.01468	4.87768	7.5517	7.80326	6.52422	6.82477	0.899288	1.37014	0	3.68836	1.97997	1.0527
974	ENSG00000223387	LINC02068	60.5303	1.76283	0.714852	2.46601	0.0136629	0.30726	15.1101	23.169	18.3398	17.9475	78.2906	12.8912	71.0438	57.5458	338.009	30.429	9.89984	53.6877
975	ENSG00000275198	LINC02960	7.29112	1.655	0.671341	2.46521	0.0136933	0.307517	2.01468	1.21942	9.70933	1.56065	2.17474	4.54985	13.4893	5.48055	8.0266	23.0523	9.89984	6.3162
976	ENSG00000100191	SLC5A4	22.2444	1.97536	0.801372	2.46497	0.0137024	0.307517	1.00734	15.8525	14.0246	11.7049	3.26211	8.34139	125.001	50.6951	7.13475	7.37672	9.89984	12.6324
977	ENSG00000080822	CLDND1	681.602	-0.487849	0.198046	-2.46331	0.0137659	0.308312	714.205	823.109	941.805	751.454	976.458	568.731	493.709	531.614	557.403	695.256	595.971	529.508
978	ENSG00000171522	PTGER4	186.588	-1.21325	0.492496	-2.46348	0.0137596	0.308312	377.753	112.187	483.309	209.127	237.047	144.837	22.4822	137.014	118.615	211.159	79.1987	106.323
979	ENSG00000283973		3.29792	3.62339	1.47217	2.46125	0.0138454	0.308514	0	2.43884	0	0.780326	0	0	9.89217	16.4417	3.56738	6.45463	0	0
980	ENSG00000214717	ZBED1	798.23	0.624405	0.253673	2.46146	0.0138374	0.308514	707.153	504.84	534.013	875.526	683.955	463.326	841.734	665.887	1176.34	789.309	1168.18	1168.5
981	ENSG00000172243	CLEC7A	501.173	-1.12967	0.458794	-2.46227	0.0138061	0.308514	1198.74	407.287	1292.42	465.855	439.297	323.798	96.2238	400.08	366.548	274.783	273.236	475.82
982	ENSG00000123338	NCKAP1L	742.524	-0.990193	0.402227	-2.46177	0.0138252	0.308514	1676.22	398.751	1374.41	989.453	990.593	497.45	303.06	475.438	566.321	840.024	305.905	492.664
983	ENSG00000196704	AMZ2	2055.04	0.651677	0.264662	2.4623	0.013805	0.308514	1708.45	1821.82	1845.85	1431.9	1463.6	1320.21	3714.06	3597.98	1976.33	1791.62	1828.5	2160.14
984	ENSG00000163697	APBB2	731.972	0.838432	0.340767	2.46043	0.0138771	0.308907	385.812	514.596	482.23	560.274	614.364	592.997	1262.6	1130.36	804.443	1522.37	467.273	446.345
985	ENSG00000178821	TMEM52	30.5244	1.77429	0.721258	2.46	0.0138938	0.308964	5.0367	21.9496	30.2068	1.56065	9.78632	14.4079	12.59	154.826	46.3759	30.429	13.8598	25.2648
986	ENSG00000170801	HTRA3	77.3387	1.55833	0.633933	2.4582	0.0139637	0.30989	56.4111	12.1942	38.8373	35.895	34.7958	56.8731	51.2594	38.3639	37.4575	116.183	410.844	38.9499
987	ENSG00000105516	DBP	1131.83	1.16619	0.474399	2.45824	0.0139619	0.30989	580.228	788.965	335.511	797.493	699.178	985.042	4231.15	1529.07	1481.35	745.049	691.009	717.941
988	ENSG00000278981		13.3624	5.74841	2.3412	2.45532	0.0140758	0.311746	0	0	2.15763	0	0	0.758308	0	61.6562	3.56738	92.209	0	0
989	ENSG00000188549	CCDC9B	9.01646	-1.3305	0.541817	-2.45562	0.0140642	0.311746	12.0881	8.53595	14.0246	18.7278	14.1358	9.858	9.89217	5.48055	0.891844	6.45463	4.94992	3.1581
990	ENSG00000287494		5.40746	-2.50759	1.0229	-2.45147	0.0142276	0.314235	8.05873	1.21942	18.3398	4.68196	19.5726	3.03323	0	2.74028	0	0	1.97997	5.2635
991	ENSG00000223891	OSER1-DT	592.228	0.94263	0.384532	2.45137	0.0142312	0.314235	486.546	445.089	306.383	308.229	355.57	529.299	518.889	1794.88	692.963	388.2	489.052	791.63
992	ENSG00000104808	DHDH	514.827	-1.87669	0.76538	-2.45197	0.0142078	0.314235	13.0954	1348.68	1569.67	337.881	295.764	1290.64	68.3459	126.053	200.665	65.4684	556.371	305.283
993	ENSG00000171502	COL24A1	7.37076	2.32379	0.948478	2.45002	0.014285	0.314249	1.00734	6.09711	3.23644	2.34098	0	2.27492	17.0865	0	3.56738	38.7278	9.89984	4.2108
994	ENSG00000138778	CENPE	31.4556	-1.20416	0.491472	-2.45011	0.0142812	0.314249	90.6607	24.3884	45.3102	47.5999	33.7084	21.9909	18.885	13.7014	23.1879	39.6499	8.90986	9.4743
995	ENSG00000148498	PARD3	868.751	0.80869	0.330117	2.44971	0.0142972	0.314249	679.955	668.243	399.161	529.841	556.733	953.951	770.69	1645.54	1734.64	1019.83	664.279	802.157
996	ENSG00000173208	ABCD2	22.0322	-1.61719	0.660297	-2.44919	0.014318	0.314249	46.3377	17.0719	73.3594	35.895	18.4853	8.34139	2.69786	5.48055	10.7021	15.6755	2.96995	27.3702
997	ENSG00000211776	TRAV2	20.2514	-2.23587	0.912256	-2.45092	0.0142491	0.314249	20.1468	8.53595	88.4628	1.56065	73.9411	7.58308	0.899288	12.3312	9.81028	0.92209	1.97997	16.8432
998	ENSG00000197562	RAB40C	35.4435	1.31856	0.538366	2.44919	0.0143176	0.314249	12.0881	42.6797	16.1822	16.3868	16.3105	18.1994	62.9502	116.462	26.7553	61.78	20.7897	14.7378
999	ENSG00000173372	C1QA	14522.1	-1.30975	0.534988	-2.44818	0.014358	0.314812	37754.1	6592.19	39148	9839.13	21042.8	9798.1	4724.86	7146.64	3141.07	19798.2	6716.05	8563.71
1000	ENSG00000286835		37.6508	-1.01038	0.412882	-2.44714	0.0143995	0.315408	48.3524	28.0467	44.2314	86.6162	19.5726	74.3142	24.2808	24.6625	16.945	20.286	28.7095	35.7918
1001	ENSG00000049323	LTBP1	301	0.961502	0.392976	2.44672	0.0144162	0.315457	133.976	230.471	161.822	312.13	152.232	234.317	258.995	400.08	135.56	745.049	383.124	464.241
1002	ENSG00000223714	LINC02601	5.45901	1.75306	0.716637	2.44623	0.0144357	0.315569	5.0367	1.21942	3.23644	3.1213	0	2.27492	12.59	5.48055	5.35106	14.7534	2.96995	9.4743
1003	ENSG00000170500	LONRF2	20.0688	2.70701	1.10693	2.4455	0.0144651	0.315846	23.1688	2.43884	1.07881	0	0	5.30816	78.2381	1.37014	8.0266	4.61045	20.7897	95.7957
1004	ENSG00000102178	UBL4A	938.952	0.553933	0.226539	2.4452	0.0144772	0.315846	673.911	1040.17	731.436	661.716	711.14	747.692	1037.78	1264.64	1573.21	1015.22	1015.72	794.789
1005	ENSG00000245164	LINC00861	181.412	-1.28416	0.525329	-2.44448	0.014506	0.316159	277.019	149.989	710.939	159.186	116.349	129.671	31.4751	126.053	70.4557	172.431	88.1086	145.273
1006	ENSG00000146426	TIAM2	94.1612	-1.08539	0.444101	-2.44401	0.0145251	0.31626	254.857	43.8992	184.477	121.731	94.6011	69.006	80.9359	30.143	53.5106	90.3648	48.5092	57.8985
1007	ENSG00000198208	RPS6KL1	54.4142	0.980498	0.401489	2.44215	0.0146	0.317575	26.1909	30.4855	29.128	23.4098	68.5043	42.4652	71.943	43.8444	106.129	107.885	69.2989	33.6864
1008	ENSG00000103056	SMPD3	12.4348	-1.19386	0.488986	-2.44151	0.014626	0.317825	18.1321	13.4136	21.5763	16.3868	22.8348	12.1329	17.0865	4.11041	8.91844	6.45463	3.95994	4.2108
1009	ENSG00000152128	TMEM163	110.922	1.28972	0.52868	2.43951	0.0147072	0.318676	109.8	28.0467	49.6255	123.291	25.0095	50.0483	181.656	175.378	66.8883	350.394	60.389	110.534
1010	ENSG00000113319	RASGRF2	344.776	-1.2169	0.498744	-2.43992	0.0146904	0.318676	281.048	224.373	596.584	163.088	304.463	1322.49	150.181	332.944	231.879	246.198	135.628	148.431
1011	ENSG00000255553	LINC02733	9.29149	2.46292	1.00976	2.43911	0.0147234	0.318676	5.0367	0	6.47288	3.1213	0	2.27492	9.89217	56.1757	6.24291	0	13.8598	8.4216
1012	ENSG00000103569	AQP9	107.519	2.52719	1.03601	2.43936	0.0147133	0.318676	82.602	69.507	9.70933	16.3868	11.9611	0.758308	398.385	634.374	15.1613	34.1173	9.89984	7.3689
1013	ENSG00000134769	DTNA	50.753	1.04915	0.430345	2.43793	0.0147715	0.319402	16.1175	30.4855	26.9704	21.8491	35.8832	66.7311	117.807	58.9159	73.1312	44.2603	32.6695	84.216
1014	ENSG00000198574	SH2D1B	14.6249	-1.23925	0.509253	-2.43346	0.0149552	0.319864	20.1468	14.6331	39.9161	10.9246	9.78632	28.0574	4.49644	6.85069	10.7021	13.8314	10.8898	5.2635
1015	ENSG00000226312	CFLAR-AS1	47.1553	1.62335	0.666674	2.43501	0.0148916	0.319864	26.1909	53.6545	26.9704	3.1213	8.69895	20.4743	137.591	123.312	32.1064	34.1173	89.0986	10.527
1016	ENSG00000170166	HOXD4	95.6731	-1.17992	0.484361	-2.43603	0.0148493	0.319864	181.321	75.6041	140.246	147.482	32.6211	219.151	80.0366	53.4354	28.539	107.885	55.4391	26.3175
1017	ENSG00000154814	OXNAD1	343.62	-0.890882	0.366303	-2.43209	0.0150119	0.319864	867.321	309.733	606.294	302.766	326.211	266.166	156.476	304.171	159.64	275.705	307.885	241.068
1018	ENSG00000180385	EMC3-AS1	36.6284	-0.811291	0.333092	-2.43564	0.0148655	0.319864	80.5873	34.1438	37.7585	36.6753	41.32	49.29	20.6836	24.6625	27.6472	19.3639	32.6695	34.7391
1019	ENSG00000231776	LINC01611	8.69505	3.35136	1.37651	2.43467	0.0149052	0.319864	2.01468	0	0	7.02293	0	0	1.79858	0	12.4858	22.1302	0.989984	57.8985
1020	ENSG00000271040	TMEM242-DT	8.59546	1.71739	0.70606	2.43236	0.0150009	0.319864	5.0367	6.09711	4.31526	2.34098	0	6.06646	2.69786	30.143	9.81028	18.4418	11.8798	6.3162
1021	ENSG00000181126	HLA-V	80.9407	1.52062	0.625142	2.43244	0.0149973	0.319864	46.3377	23.169	25.8915	51.5015	63.0674	40.9486	61.1516	63.0263	51.727	72.8451	448.463	23.1594
1022	ENSG00000124508	BTN2A2	508.327	-0.963875	0.396145	-2.43314	0.0149685	0.319864	858.255	358.51	1233.08	693.71	422.987	466.359	183.455	246.625	564.537	422.317	223.736	426.344
1023	ENSG00000171657	GPR82	76.1515	-0.982703	0.403394	-2.43609	0.014847	0.319864	83.6093	60.9711	184.477	81.1539	132.659	63.6979	28.7772	64.3965	25.8635	83.9102	48.5092	55.7931
1024	ENSG00000272140		9.62338	-1.2362	0.508281	-2.43213	0.0150105	0.319864	15.1101	18.2913	5.39407	7.80326	18.4853	15.9245	3.59715	6.85069	4.45922	8.29881	4.94992	6.3162
1025	ENSG00000198682	PAPSS2	367.239	0.937534	0.385435	2.4324	0.014999	0.319864	320.334	236.568	216.842	228.635	226.173	282.849	454.14	627.523	354.954	881.518	125.728	451.608
1026	ENSG00000083782	EPYC	7.50864	-3.45344	1.41722	-2.43677	0.0148193	0.319864	25.1835	0	40.9949	2.34098	4.34948	9.858	0	0	0	7.37672	0	0
1027	ENSG00000080031	PTPRH	49.8995	3.70706	1.52345	2.43333	0.0149606	0.319864	8.05873	1.21942	1.07881	7.80326	2.17474	21.9909	37.7701	449.405	0	67.3126	1.97997	0
1028	ENSG00000182057	OGFRP1	25.0183	1.07101	0.44026	2.43268	0.0149874	0.319864	18.1321	9.75537	18.3398	14.8262	20.66	15.1662	38.6694	21.9222	25.8635	12.9093	70.2889	33.6864
1029	ENSG00000187944	C2orf66	5.67521	2.46177	1.01238	2.43167	0.0150292	0.319922	0	0	3.23644	2.34098	0	4.54985	13.4893	9.59097	14.2695	15.6755	4.94992	0
1030	ENSG00000253696	KBTBD11-OT1	18.1255	1.19623	0.492197	2.43038	0.0150829	0.320442	6.04405	9.75537	9.70933	16.3868	17.3979	6.82477	7.1943	19.1819	20.5124	42.4161	33.6595	28.4229
1031	ENSG00000196415	PRTN3	4.19666	-3.4073	1.4019	-2.43048	0.0150787	0.320442	3.02202	13.4136	24.8127	0	0	4.54985	0.899288	2.74028	0	0.92209	0	0
1032	ENSG00000159640	ACE	734.035	1.06368	0.43788	2.42915	0.0151342	0.321221	323.356	547.52	476.836	968.384	223.998	310.148	1139.4	371.307	613.589	1438.46	805.847	1589.58
1033	ENSG00000110031	LPXN	518.912	-0.835523	0.344226	-2.42725	0.0152138	0.322598	981.15	474.355	1189.93	401.088	545.859	398.112	263.491	468.587	393.303	331.952	313.825	465.293
1034	ENSG00000270133		3.92323	-2.2925	0.9449	-2.42619	0.0152583	0.323015	6.04405	2.43884	19.4187	3.1213	4.34948	3.79154	0.899288	1.37014	2.67553	0	2.96995	0
1035	ENSG00000177409	SAMD9L	538.932	-1.06527	0.43909	-2.42608	0.015263	0.323015	1051.66	379.24	777.825	1077.63	782.906	307.115	521.587	142.494	335.333	239.743	215.817	635.831
1036	ENSG00000248801	C8orf34-AS1	10.6941	-5.41615	2.23544	-2.42286	0.015399	0.324639	0	18.2913	0	14.0459	0	93.2719	1.79858	0	0	0.92209	0	0
1037	ENSG00000261659		21.862	-1.35892	0.560708	-2.42358	0.0153683	0.324639	35.2569	31.7049	16.1822	27.3114	4.34948	73.5559	7.1943	12.3312	12.4858	8.29881	16.8297	16.8432
1038	ENSG00000279602		94.4664	-0.952479	0.393085	-2.42309	0.0153892	0.324639	133.976	193.888	162.901	118.61	89.1643	49.29	51.2594	52.0652	31.2145	94.0532	61.379	95.7957
1039	ENSG00000187474	FPR3	635.707	-0.989141	0.408227	-2.42302	0.0153923	0.324639	1114.12	454.844	1184.54	653.133	1301.58	365.504	444.248	152.085	374.575	480.409	494.992	608.461
1040	ENSG00000174171		50.3706	1.44235	0.595566	2.42182	0.015443	0.325254	14.1028	34.1438	23.7339	49.1605	27.1842	14.4079	181.656	13.7014	28.539	25.8185	109.888	82.1106
1041	ENSG00000225051	HMGB3P22	16.8712	1.24242	0.513185	2.42099	0.0154781	0.325368	9.06607	4.87768	3.23644	20.2885	9.78632	12.1329	16.1872	26.0326	46.3759	18.4418	12.8698	23.1594
1042	ENSG00000241990	PRR34-AS1	407.828	1.27223	0.525481	2.42108	0.0154743	0.325368	231.688	187.791	80.9111	302.766	349.046	280.574	1678.97	464.477	353.17	156.755	476.182	331.601
1043	ENSG00000183454	GRIN2A	82.4419	2.37804	0.98258	2.4202	0.015512	0.325768	64.4698	21.9496	37.7585	0	9.78632	25.7825	319.247	100.02	0.891844	341.173	19.7997	48.4242
1044	ENSG00000167077	MEI1	74.5001	-1.20384	0.497622	-2.41919	0.015555	0.326358	134.984	53.6545	251.364	65.5474	69.5916	47.7734	17.9858	73.9874	47.2677	37.8057	27.7196	66.3201
1045	ENSG00000231993	EP300-AS1	34.3463	2.27058	0.939161	2.41767	0.0156203	0.327412	1.00734	10.9748	24.8127	0.780326	14.1358	18.9577	8.99288	228.813	44.5922	1.84418	43.5593	13.6851
1046	ENSG00000117407	ARTN	18.8632	2.26096	0.935579	2.41664	0.0156644	0.328024	17.1248	4.87768	0	5.46228	8.69895	3.03323	57.5544	1.37014	5.35106	96.8195	3.95994	22.1067
1047	ENSG00000212195	U3	3.97519	-2.73207	1.13126	-2.41506	0.0157326	0.329137	1.00734	14.6331	10.7881	3.1213	6.52422	5.30816	0	1.37014	0	0	4.94992	0
1048	ENSG00000175567	UCP2	2079.7	-1.19153	0.493667	-2.41363	0.0157943	0.330113	5731.77	975.537	4632.43	2135.75	2396.56	1484.01	690.653	2585.45	870.44	1725.23	565.281	1163.23
1049	ENSG00000169403	PTAFR	325.258	-0.966309	0.40042	-2.41324	0.0158115	0.330158	745.432	192.669	750.855	346.465	310.988	235.834	159.174	141.124	312.145	239.743	196.017	272.649
1050	ENSG00000239779	WBP1	12.735	1.1841	0.490766	2.41276	0.0158324	0.330278	12.0881	3.65826	6.47288	8.58359	6.52422	9.0997	36.8708	16.4417	12.4858	10.143	17.8197	12.6324
1051	ENSG00000232117	LINC00384	4.70341	-2.88845	1.19766	-2.41175	0.0158762	0.330878	16.1175	2.43884	9.70933	12.4852	0	9.0997	0	0	0	4.61045	1.97997	0
1052	ENSG00000229388	TAF12-DT	32.9441	0.804335	0.333621	2.41092	0.0159122	0.330998	25.1835	26.8273	31.2856	19.5081	31.5337	10.6163	53.058	41.1041	31.2145	40.572	46.5293	37.8972
1053	ENSG00000197629	MPEG1	901.38	-0.880346	0.365141	-2.41097	0.01591	0.330998	1495.9	499.963	1428.35	1168.15	1585.38	831.864	624.106	341.164	643.911	933.155	377.184	887.426
1054	ENSG00000085465	OVGP1	36.9054	0.993824	0.412451	2.40956	0.0159718	0.331775	26.1909	18.2913	15.1034	22.6295	28.2716	37.1571	54.8566	30.143	20.5124	36.8836	80.1887	72.6363
1055	ENSG00000255136	TPBGL-AS1	4.25212	-4.03811	1.676	-2.40937	0.0159799	0.331775	28.2055	14.6331	3.23644	0	0	2.27492	0	0	2.67553	0	0	0
1056	ENSG00000158555	GDPD5	162.948	1.20738	0.501333	2.40834	0.0160251	0.332399	112.822	71.9458	88.4628	99.1014	109.824	108.438	125.9	364.457	128.426	583.683	63.359	98.9538
1057	ENSG00000171345	KRT19	16236.5	4.27328	1.7755	2.4068	0.0160929	0.33349	2911.22	108.528	7.5517	33.554	8.69895	6510.83	87713.9	50748.5	4.45922	45899.8	888.016	3.1581
1058	ENSG00000187013	LINC02875	41.9633	1.37201	0.570213	2.40614	0.0161221	0.333779	3.02202	20.7302	14.0246	55.4031	18.4853	28.0574	90.8281	54.8055	32.1064	96.8195	19.7997	69.4782
1059	ENSG00000125735	TNFSF14	94.5645	-1.54761	0.643714	-2.40419	0.0162085	0.335251	457.333	53.6545	151.034	85.8359	75.0285	22.7492	75.5402	43.8444	57.9699	22.1302	13.8598	75.7944
1060	ENSG00000182162	P2RY8	295.896	-0.666685	0.277355	-2.40373	0.0162289	0.335357	347.533	325.585	378.664	347.245	461.045	319.248	137.591	152.085	225.637	372.524	259.376	224.225
1061	ENSG00000060656	PTPRU	606.999	1.44005	0.599865	2.40063	0.0163669	0.336099	197.439	375.582	283.728	120.951	207.688	775.749	1467.64	1748.3	231.879	1077	663.29	134.746
1062	ENSG00000235052		13.8053	1.44075	0.600009	2.40122	0.0163404	0.336099	6.04405	13.4136	7.5517	5.46228	9.78632	3.03323	13.4893	12.3312	57.078	14.7534	6.92989	15.7905
1063	ENSG00000049239	H6PD	1238.68	0.79871	0.333057	2.39812	0.0164797	0.336099	587.28	1051.14	1038.9	1076.85	1071.06	600.58	1822.86	2400.48	1104.1	2205.64	882.076	1023.22
1064	ENSG00000172554	SNTG2	22.5635	5.25745	2.18966	2.40104	0.0163487	0.336099	0	4.87768	0	0	2.17474	0	202.34	57.5458	0	1.84418	1.97997	0
1065	ENSG00000063660	GPC1	500.811	1.10898	0.462017	2.4003	0.0163816	0.336099	388.834	162.183	78.7534	276.235	430.598	566.456	1115.12	726.173	618.048	555.098	821.687	270.544
1066	ENSG00000127951	FGL2	1937.46	-1.08114	0.450758	-2.39849	0.0164627	0.336099	4276.16	1026.75	3652.86	2780.3	2922.85	1128.36	356.118	1324.92	1664.18	1246.67	987.014	1883.28
1067	ENSG00000204971		14.0595	-1.87875	0.782757	-2.40017	0.0163874	0.336099	23.1688	10.9748	49.6255	3.90163	8.69895	35.6405	1.79858	16.4417	7.13475	0	3.95994	7.3689
1068	ENSG00000278627		7.1662	-1.61223	0.672034	-2.39904	0.0164382	0.336099	6.04405	14.6331	11.867	10.1442	6.52422	15.9245	1.79858	0	8.91844	1.84418	1.97997	6.3162
1069	ENSG00000109113	RAB34	1283.25	1.03276	0.429909	2.40227	0.0162936	0.336099	925.746	685.315	1280.55	748.333	1133.04	282.849	2360.63	2771.79	1008.68	1576.77	599.931	2025.39
1070	ENSG00000267288		141.025	1.273	0.53041	2.40002	0.016394	0.336099	28.2055	112.187	64.7288	76.4719	119.611	94.0302	85.4324	387.749	224.745	366.07	76.2288	56.8458
1071	ENSG00000225978	HAR1A	38.8576	1.98243	0.826409	2.39885	0.0164465	0.336099	7.05139	4.87768	9.70933	11.7049	5.43685	54.5982	111.512	193.189	11.594	28.5848	22.7696	5.2635
1072	ENSG00000277235		21.1704	1.32244	0.551235	2.39905	0.0164378	0.336099	19.1395	12.1942	10.7881	14.0459	3.26211	12.8912	45.8637	36.9937	35.6738	11.9872	5.93991	45.2661
1073	ENSG00000269246		398.966	1.04753	0.436737	2.39855	0.0164602	0.336099	379.768	192.669	200.659	269.212	152.232	366.263	840.834	309.651	1041.67	280.315	206.907	547.404
1074	ENSG00000100099	HPS4	940.445	0.663835	0.276808	2.39818	0.0164769	0.336099	599.368	758.48	518.91	840.411	730.712	918.311	865.115	1346.85	1120.16	1865.39	956.325	765.313
1075	ENSG00000141469	SLC14A1	98.0462	-1.64931	0.687907	-2.39758	0.016504	0.336282	14.1028	502.401	77.6746	27.3114	195.726	75.0725	35.0722	47.9548	24.9716	29.5069	76.2288	70.5309
1076	ENSG00000251369	ZNF550	97.5581	-0.742601	0.309821	-2.39687	0.0165358	0.336616	111.815	120.723	120.827	145.921	109.824	122.846	28.7772	80.8381	68.672	67.3126	75.2388	117.902
1077	ENSG00000018625	ATP1A2	47.3001	1.8179	0.758809	2.39573	0.0165874	0.337041	31.2276	9.75537	22.6551	6.24261	33.7084	21.9909	25.1801	15.0715	10.7021	257.263	14.8498	118.955
1078	ENSG00000278129	ZNF8	62.3665	-0.744868	0.310908	-2.39579	0.0165847	0.337041	44.323	68.2876	97.0933	63.2064	91.339	103.888	28.7772	53.4354	49.0514	45.1824	39.5994	64.2147
1079	ENSG00000255038		4.80678	1.75577	0.733449	2.39385	0.0166726	0.338145	1.00734	2.43884	6.47288	1.56065	2.17474	0	6.29502	4.11041	8.91844	8.29881	6.92989	9.4743
1080	ENSG00000007038	PRSS21	9.74066	2.50525	1.04644	2.39406	0.016663	0.338145	1.00734	2.43884	2.15763	5.46228	6.52422	0	70.1445	10.9611	7.13475	3.68836	0	7.3689
1081	ENSG00000272894	MIOS-DT	199.858	1.42579	0.595925	2.39257	0.016731	0.339015	134.984	92.676	202.817	111.587	44.5821	63.6979	97.1231	717.952	85.617	593.826	103.948	149.483
1082	ENSG00000264707	L3MBTL4-AS1	62.8917	-1.04061	0.435017	-2.39213	0.0167511	0.339109	110.808	32.9244	147.798	42.1376	98.9506	75.0725	26.9786	52.0652	25.8635	73.7672	34.6495	33.6864
1083	ENSG00000138755	CXCL9	1166.09	-1.47639	0.61749	-2.39095	0.0168049	0.3392	3260.76	413.384	2554.63	1147.86	2089.92	827.314	148.383	230.183	318.388	1226.38	315.805	1460.09
1084	ENSG00000175564	UCP3	13.6418	-1.19996	0.50194	-2.39064	0.0168192	0.3392	12.0881	9.75537	22.6551	27.3114	19.5726	22.7492	6.29502	6.85069	19.6206	4.61045	6.92989	5.2635
1085	ENSG00000285587		6.65433	3.2678	1.36691	2.39065	0.0168186	0.3392	3.02202	0	2.15763	0	0	2.27492	1.79858	13.7014	8.0266	48.8708	0	0
1086	ENSG00000178803	ADORA2A-AS1	283.018	0.842602	0.352504	2.39034	0.016833	0.3392	124.91	236.568	117.591	235.658	258.794	241.9	288.671	497.36	518.161	225.912	463.313	187.381
1087	ENSG00000225431	LINC01671	524.886	0.954485	0.399276	2.39054	0.0168236	0.3392	212.549	207.302	504.885	308.229	446.909	464.085	1544.08	524.763	652.83	386.356	444.503	602.144
1088	ENSG00000183773	AIFM3	20.7557	1.59648	0.668238	2.38909	0.0168903	0.340042	21.1542	4.87768	5.39407	7.02293	9.78632	13.6495	106.116	16.4417	24.9716	21.2081	7.91987	10.527
1089	ENSG00000273125	LINC01990	4.24683	2.3862	0.999419	2.38759	0.0169594	0.340266	0	1.21942	0	0	2.17474	4.54985	12.59	10.9611	0.891844	8.29881	3.95994	6.3162
1090	ENSG00000173599	PC	407.106	1.0932	0.457715	2.38838	0.0169229	0.340266	290.114	519.473	161.822	199.763	220.736	167.586	626.804	1049.53	745.582	486.864	213.837	203.171
1091	ENSG00000222612	RNU2-52P	16.2333	2.57898	1.0802	2.3875	0.0169636	0.340266	8.05873	12.1942	2.15763	0	1.08737	4.54985	12.59	113.721	11.594	26.7406	0	2.1054
1092	ENSG00000141968	VAV1	252.771	-0.923349	0.386645	-2.3881	0.0169355	0.340266	538.927	165.841	471.442	342.563	275.104	192.61	131.296	115.092	176.585	305.212	105.928	212.645
1093	ENSG00000204482	LST1	3301.62	-1.03136	0.432191	-2.38634	0.0170168	0.341021	8237.03	2157.16	7142.83	3285.95	3692.71	2087.62	920.871	2923.87	2522.14	1979.73	1465.18	3204.42
1094	ENSG00000147164	SNX12	891.826	0.519454	0.217896	2.38395	0.017128	0.341999	651.75	676.779	758.406	819.342	891.643	600.58	1448.75	960.467	1200.42	746.893	1006.81	940.061
1095	ENSG00000259359		501.125	1.17896	0.494449	2.38439	0.0171076	0.341999	224.637	545.081	221.157	235.658	405.589	210.81	700.545	264.437	439.679	289.536	558.351	1918.02
1096	ENSG00000186532	SMYD4	428.634	0.970645	0.407112	2.38422	0.0171153	0.341999	386.819	191.449	344.142	248.924	200.076	365.504	419.068	1261.9	616.264	565.241	266.306	277.913
1097	ENSG00000125971	DYNLRB1	916.29	0.728263	0.305441	2.3843	0.0171118	0.341999	558.067	649.951	546.959	850.555	697.004	836.414	1783.29	605.601	884.709	1518.68	1281.04	783.209
1098	ENSG00000268729		35.279	-1.18658	0.497915	-2.3831	0.0171674	0.342473	52.3817	60.9711	42.0738	74.131	38.0579	27.2991	26.0794	1.37014	28.539	33.1952	11.8798	27.3702
1099	ENSG00000065485	PDIA5	1944.79	0.900924	0.37815	2.38245	0.0171979	0.342769	971.077	1714.51	819.899	1839.23	1110.2	1684.2	5089.97	2203.18	1242.34	3104.68	1892.85	1665.37
1100	ENSG00000253276	CCDC71L	328.23	1.01072	0.424889	2.37879	0.0173696	0.345562	304.217	245.104	120.827	199.763	255.532	181.236	850.726	456.256	187.287	461.045	533.602	143.167
1101	ENSG00000261040	WFDC21P	262.894	-1.39795	0.587668	-2.37881	0.0173685	0.345562	1037.56	184.133	539.407	88.9572	284.891	151.662	38.6694	198.67	116.832	116.183	118.798	278.966
1102	ENSG00000040487	SLC66A1	265.265	0.597799	0.251499	2.37694	0.0174567	0.34698	128.94	241.445	230.866	275.455	197.901	191.852	322.844	298.69	299.66	263.718	462.323	269.491
1103	ENSG00000172940	SLC22A13	23.4274	2.80526	1.1807	2.37593	0.0175049	0.347611	1.00734	20.7302	2.15763	3.1213	5.43685	3.03323	5.39573	0	5.35106	0	130.678	104.217
1104	ENSG00000214456	PLIN5	38.1907	2.11906	0.89201	2.37561	0.0175202	0.347611	60.4405	1.21942	2.15763	1.56065	15.2232	5.30816	16.1872	20.5521	173.018	106.04	20.7897	35.7918
1105	ENSG00000119703	ZC2HC1C	163.463	0.899687	0.378971	2.37402	0.0175954	0.348786	80.5873	213.399	118.67	72.5703	121.785	78.1057	128.598	346.645	195.314	140.158	308.875	156.852
1106	ENSG00000121895	TMEM156	60.0286	-1.04253	0.439835	-2.37029	0.0177743	0.352015	123.903	48.7768	105.724	60.8654	98.9506	45.4985	24.2808	94.5395	24.9716	37.8057	28.7095	26.3175
1107	ENSG00000288528		15.625	-1.78575	0.753616	-2.36957	0.0178086	0.352056	40.2936	4.87768	50.7043	35.895	6.52422	6.82477	4.49644	9.59097	8.91844	0	9.89984	9.4743
1108	ENSG00000273162		10.0601	-1.67855	0.708307	-2.3698	0.0177976	0.352056	33.2423	10.9748	18.3398	12.4852	9.78632	7.58308	4.49644	0	2.67553	13.8314	0.989984	6.3162
1109	ENSG00000234810		3.81167	-3.32797	1.4047	-2.36917	0.017828	0.352122	14.1028	10.9748	0	7.02293	1.08737	8.34139	0	0	0	0	0	4.2108
1110	ENSG00000100024	UPB1	1028.32	1.08411	0.457716	2.36853	0.0178589	0.352415	366.672	874.325	474.678	652.352	819.876	766.649	747.308	2993.75	1104.99	894.427	2236.37	408.448
1111	ENSG00000153551	CMTM7	503.039	-0.739636	0.312399	-2.3676	0.0179038	0.352983	874.372	331.683	1020.56	566.517	564.345	417.828	409.176	435.704	328.199	448.136	267.296	372.656
1112	ENSG00000006555	TTC22	476.055	0.902322	0.381167	2.36726	0.0179203	0.352991	365.665	168.28	276.176	436.983	411.026	332.897	712.236	313.762	926.626	440.759	1017.7	310.547
1113	ENSG00000286001		18.0439	-2.21447	0.936345	-2.36502	0.0180292	0.354818	8.05873	26.8273	15.1034	45.2589	7.61158	75.0725	3.59715	2.74028	0	0	5.93991	26.3175
1114	ENSG00000254554	ADM-DT	13.636	1.77643	0.751331	2.36437	0.0180607	0.355119	10.0734	7.31653	1.07881	16.3868	1.08737	0.758308	34.1729	27.4028	3.56738	16.5976	17.8197	27.3702
1115	ENSG00000234476	LINC02765	10.9564	2.37776	1.00623	2.36305	0.0181253	0.356069	0	2.43884	5.39407	7.80326	3.26211	2.27492	80.9359	0	8.0266	11.0651	3.95994	6.3162
1116	ENSG00000172164	SNTB1	421.782	0.936423	0.39642	2.3622	0.0181669	0.356566	458.34	224.373	198.502	251.265	272.93	331.381	870.511	731.654	439.679	794.842	291.055	196.855
1117	ENSG00000124491	F13A1	392.738	1.65577	0.701154	2.36149	0.0182016	0.356928	43.3157	267.053	407.792	181.036	91.339	144.837	44.9644	1526.33	206.016	1222.69	256.406	321.074
1118	ENSG00000250337	PURPL	43.5376	-2.67896	1.13475	-2.36083	0.0182341	0.357245	2.01468	4.87768	17.261	0	73.9411	353.372	8.09359	34.2534	7.13475	4.61045	15.8397	1.0527
1119	ENSG00000227634	LINC01714	111.547	1.54563	0.655403	2.35828	0.0183597	0.358743	16.1175	191.449	60.4136	14.8262	41.32	18.1994	117.807	367.197	173.018	199.171	48.5092	90.5322
1120	ENSG00000167895	TMC8	283.66	-1.00852	0.427622	-2.35843	0.0183525	0.358743	527.847	147.55	516.752	547.008	332.735	202.468	212.232	94.5395	256.851	315.355	98.9984	151.589
1121	ENSG00000213988	ZNF90	77.0944	-1.60415	0.680191	-2.35838	0.0183547	0.358743	150.094	228.032	56.0983	216.931	26.0969	18.9577	2.69786	31.5132	42.8085	62.7021	37.6194	51.5823
1122	ENSG00000231090	MIR4422HG	17.3681	-4.39783	1.86571	-2.35719	0.018414	0.359163	71.5212	0	92.778	16.3868	15.2232	3.03323	0	0	0	0	0	9.4743
1123	ENSG00000237686	SCIRT	612.071	1.1438	0.485183	2.35747	0.0183999	0.359163	117.859	637.757	215.763	642.208	569.781	105.405	920.871	642.595	851.711	532.968	774.168	1333.77
1124	ENSG00000108798	ABI3	865.523	-0.693337	0.294253	-2.35626	0.01846	0.359739	1566.42	688.973	1446.69	889.572	1190.67	635.462	505.4	660.406	574.348	918.402	608.84	701.098
1125	ENSG00000008323	PLEKHG6	125.885	1.74025	0.739313	2.35388	0.0185786	0.361729	10.0734	20.7302	87.3839	119.39	90.2516	19.716	81.8352	700.14	58.8617	184.418	34.6495	103.165
1126	ENSG00000134013	LOXL2	1206.99	1.38913	0.590365	2.353	0.0186227	0.362265	704.131	915.785	464.969	564.956	635.024	717.359	1113.32	909.772	704.557	6518.26	883.066	352.655
1127	ENSG00000273073		4.28718	-1.92339	0.817798	-2.35191	0.0186773	0.362452	8.05873	3.65826	5.39407	5.46228	2.17474	15.9245	3.59715	1.37014	1.78369	0	2.96995	1.0527
1128	ENSG00000272913		82.0971	0.838893	0.356627	2.3523	0.0186579	0.362452	24.1762	96.3343	78.7534	49.9409	58.7179	46.2568	89.9288	82.2083	107.021	104.196	79.1987	168.432
1129	ENSG00000109684	CLNK	24.312	-1.65592	0.704102	-2.35182	0.0186819	0.362452	68.4992	0	38.8373	39.0163	34.7958	40.1903	9.89217	10.9611	14.2695	10.143	1.97997	23.1594
1130	ENSG00000270164	LINC01480	74.4971	-1.30739	0.556072	-2.35111	0.0187173	0.362818	196.431	31.7049	209.29	72.5703	100.038	26.5408	13.4893	56.1757	30.3227	71.923	46.5293	38.9499
1131	ENSG00000061676	NCKAP1	1586.95	0.618047	0.263002	2.34997	0.018775	0.363613	785.726	1501.11	1195.33	1379.62	1615.83	1035.85	2590.85	1957.93	2104.75	1565.71	2094.81	1215.87
1132	ENSG00000112029	FBXO5	51.9201	-0.980382	0.417363	-2.34899	0.0188244	0.363953	116.852	52.4351	117.591	40.5769	52.1937	34.1239	33.2737	36.9937	28.539	58.0917	20.7897	31.581
1133	ENSG00000204267	TAP2	582.445	-0.868229	0.369622	-2.34896	0.0188257	0.363953	1223.92	674.34	910.519	519.697	617.626	570.248	185.253	202.78	429.869	617.8	525.682	511.612
1134	ENSG00000117408	IPO13	418.707	0.714631	0.304344	2.3481	0.0188694	0.364154	278.026	258.517	327.959	390.943	337.084	310.148	779.683	316.502	567.213	382.667	766.248	309.494
1135	ENSG00000281162	LINC01127	5326.39	3.47848	1.48138	2.34813	0.0188677	0.364154	2177.87	2816.86	84.1475	81.9342	15.2232	86.4471	254.499	25074.9	766.094	32395.8	54.4491	108.428
1136	ENSG00000272606	PPP4R3B-DT	224.294	0.694526	0.295958	2.3467	0.0189403	0.364558	195.424	157.305	138.088	203.665	176.154	156.97	348.924	276.768	305.011	122.638	215.817	394.763
1137	ENSG00000243836	WDR86-AS1	75.0133	-1.60665	0.684601	-2.34684	0.0189334	0.364558	77.5653	28.0467	340.905	26.5311	157.669	46.2568	12.59	90.4291	16.945	13.8314	34.6495	54.7404
1138	ENSG00000085185	BCORL1	207.764	0.557931	0.237714	2.34707	0.0189219	0.364558	115.844	182.913	137.009	213.029	182.678	176.686	282.376	265.807	319.28	224.99	200.967	191.591
1139	ENSG00000238005	LNCATV	55.7044	1.50787	0.643003	2.34504	0.0190249	0.365288	19.1395	15.8525	38.8373	33.554	46.7569	19.716	218.527	138.384	16.0532	72.8451	10.8898	37.8972
1140	ENSG00000168159	RNF187	2438	0.820201	0.349769	2.34498	0.0190282	0.365288	1495.9	2625.41	1277.32	2052.26	1962.7	1164.76	1483.83	4736.57	4018.65	1734.45	3779.76	2924.4
1141	ENSG00000156218	ADAMTSL3	162.494	1.43203	0.610556	2.34545	0.0190043	0.365288	67.4918	182.913	129.458	6.24261	29.359	112.23	241.009	319.242	148.938	426.006	204.927	82.1106
1142	ENSG00000250934		199.98	1.43281	0.611184	2.34432	0.0190617	0.365611	48.3524	274.37	98.1721	63.2064	104.387	60.6646	291.369	630.263	251.5	458.279	79.1987	40.0026
1143	ENSG00000116260	QSOX1	1818.28	0.901177	0.384703	2.34253	0.0191536	0.366171	1501.95	1569.39	1077.74	1167.37	1603.87	689.302	4960.47	2708.76	1468.87	2199.19	1816.62	1055.86
1144	ENSG00000174125	TLR1	159.744	-1.04511	0.446176	-2.34237	0.0191619	0.366171	428.12	129.259	307.462	127.973	213.124	84.9305	71.943	156.196	79.3741	137.391	48.5092	132.64
1145	ENSG00000270362	HMGN3-AS1	80.941	-0.682768	0.291517	-2.34212	0.0191745	0.366171	120.881	110.967	99.2509	83.4949	82.6401	100.855	32.3744	64.3965	50.8351	68.2347	58.4091	98.9538
1146	ENSG00000147044	CASK	678.096	0.785	0.334983	2.3434	0.0191087	0.366171	231.688	547.52	382.979	860.7	536.073	428.444	929.864	1153.66	888.277	468.422	914.746	794.789
1147	ENSG00000256053	COA8	499.554	0.928144	0.396278	2.34215	0.019173	0.366171	190.387	521.912	183.398	375.337	422.987	371.571	1139.4	493.25	600.211	886.129	556.371	253.701
1148	ENSG00000197992	CLEC9A	88.8567	-1.26171	0.538897	-2.34128	0.0192176	0.366674	267.953	18.2913	92.778	149.823	151.144	72.0393	17.0865	69.877	66.8883	34.1173	50.4892	75.7944
1149	ENSG00000270419	CAHM	61.5251	-0.967775	0.413432	-2.34084	0.0192406	0.366795	105.771	87.7983	58.256	106.905	56.5432	72.7976	8.99288	53.4354	61.5372	47.0266	28.7095	50.5296
1150	ENSG00000234396		31.7899	1.99633	0.853016	2.34033	0.0192669	0.366977	2.01468	13.4136	2.15763	24.9704	5.43685	28.0574	0.899288	27.4028	139.128	46.1045	78.2088	13.6851
1151	ENSG00000105255	FSD1	5.82388	-1.67637	0.716929	-2.33826	0.0193738	0.368692	13.0954	2.43884	9.70933	14.8262	8.69895	4.54985	0.899288	1.37014	1.78369	7.37672	1.97997	3.1581
1152	ENSG00000225131	PSME2P2	90.9001	-0.946937	0.405063	-2.33775	0.0194	0.368736	134.984	117.064	148.876	60.8654	187.028	69.006	48.5616	101.39	35.6738	43.3382	102.958	41.0553
1153	ENSG00000186469	GNG2	383.815	-0.704426	0.301392	-2.33724	0.0194267	0.368736	495.612	349.974	612.766	514.235	591.529	290.432	199.642	283.619	280.931	500.695	232.646	253.701
1154	ENSG00000131095	GFAP	37.8592	1.52801	0.65371	2.33744	0.0194163	0.368736	51.3744	15.8525	24.8127	6.24261	7.61158	11.3746	53.058	52.0652	32.9982	164.132	15.8397	18.9486
1155	ENSG00000110077	MS4A6A	4204.21	-1.10666	0.473578	-2.33681	0.019449	0.368841	8511.02	2631.51	12444.1	2949.63	5373.78	2541.85	1165.48	3665.12	1768.53	4124.51	1928.49	3346.53
1156	ENSG00000231691		5.57902	-3.36508	1.441	-2.33524	0.0195307	0.369026	0	25.6078	16.1822	11.7049	7.61158	0	0	0	0.891844	0	4.94992	0
1157	ENSG00000167106	FAM102A	583.316	1.46903	0.628979	2.33559	0.0195128	0.369026	359.621	190.23	316.093	414.353	318.599	258.583	993.713	232.923	172.126	537.579	3016.48	189.486
1158	ENSG00000251002	TRD-AS1	22.4715	-1.42416	0.609657	-2.336	0.0194912	0.369026	16.1175	98.7731	15.1034	24.9704	14.1358	27.2991	5.39573	16.4417	17.8369	4.61045	7.91987	21.054
1159	ENSG00000232724	TRIM80P	13.813	1.59526	0.682964	2.33578	0.0195026	0.369026	8.05873	20.7302	3.23644	0.780326	4.34948	4.54985	17.0865	47.9548	24.0798	14.7534	13.8598	6.3162
1160	ENSG00000242100	RPL9P32	4.87012	-1.71402	0.734055	-2.33501	0.019543	0.369026	3.02202	14.6331	8.63051	3.90163	9.78632	5.30816	3.59715	0	1.78369	2.76627	3.95994	1.0527
1161	ENSG00000173531	MST1	389.093	1.47901	0.633636	2.33416	0.0195876	0.369528	78.5726	213.399	74.4382	196.642	126.135	542.949	227.52	652.186	814.254	307.978	1359.25	75.7944
1162	ENSG00000186470	BTN3A2	1524.35	-0.851094	0.364673	-2.33385	0.0196034	0.369528	2358.19	1098.7	3094.04	2223.15	1955.09	1039.64	643.89	617.932	1181.69	1616.42	979.095	1484.31
1163	ENSG00000268895	A1BG-AS1	60.0622	-1.26081	0.540418	-2.33302	0.0196469	0.37003	152.108	25.6078	87.3839	142.019	46.7569	54.5982	11.6907	23.2923	40.133	58.0917	14.8498	64.2147
1164	ENSG00000196196	HRCT1	1171.26	2.01636	0.864659	2.33197	0.0197025	0.370571	1042.6	913.346	346.299	43.6983	235.959	203.985	262.592	4439.25	199.773	5603.54	585.081	178.959
1165	ENSG00000260592		5.45345	-2.50242	1.07315	-2.33183	0.0197094	0.370571	24.1762	4.87768	20.4975	3.90163	0	2.27492	3.59715	1.37014	0	2.76627	1.97997	0
1166	ENSG00000081842	PCDHA6	3.69596	-2.92328	1.2547	-2.32987	0.0198129	0.372198	0	20.7302	4.31526	3.1213	1.08737	9.858	0.899288	1.37014	0	0	2.96995	0
1167	ENSG00000105366	SIGLEC8	192.178	-1.17525	0.504509	-2.3295	0.0198324	0.372245	469.421	86.5789	426.132	107.685	309.9	198.677	89.0295	134.274	55.2943	206.548	175.227	47.3715
1168	ENSG00000280254		3.96726	3.82768	1.64365	2.32877	0.0198715	0.372658	0	0	0	0	3.26211	0	0	16.4417	4.45922	20.286	0	3.1581
1169	ENSG00000138111	MFSD13A	79.0958	-0.857843	0.368494	-2.32797	0.0199137	0.37313	131.962	56.0934	147.798	92.8588	83.7274	99.3384	89.0295	58.9159	38.3493	82.066	40.5894	28.4229
1170	ENSG00000169248	CXCL11	400.835	-1.48119	0.636395	-2.32748	0.0199399	0.373303	489.568	247.542	1701.29	359.73	544.772	198.677	97.1231	84.9486	113.264	177.963	94.0485	701.098
1171	ENSG00000258386		4.2316	4.52896	1.94648	2.32674	0.0199789	0.373714	0	2.43884	0	0	0	0	6.29502	0	0	0	0.989984	41.0553
1172	ENSG00000173868	PHOSPHO1	3.55841	-2.1727	0.934235	-2.32564	0.0200377	0.374493	10.0734	6.09711	3.23644	8.58359	3.26211	3.03323	0	5.48055	0.891844	0	0.989984	1.0527
1173	ENSG00000169715	MT1E	17564.1	2.77935	1.19531	2.32522	0.0200603	0.374596	3444.1	1915.71	12026.6	1855.62	4116.78	3438.17	155.577	96104.2	1678.45	83195.6	845.447	1992.76
1174	ENSG00000253553		455.489	6.60923	2.84347	2.32435	0.0201065	0.375139	0	0	53.9407	0	0	1.51662	3.59715	3935.04	0	1463.36	0	8.4216
1175	ENSG00000229666	MAST4-AS1	4.29247	-1.86292	0.802411	-2.32165	0.0202519	0.377332	12.0881	7.31653	5.39407	5.46228	8.69895	1.51662	0	1.37014	2.67553	0.92209	3.95994	2.1054
1176	ENSG00000064270	ATP2C2	3.34401	3.6762	1.58353	2.32153	0.0202585	0.377332	2.01468	0	0	0.780326	0	0	26.0794	1.37014	3.56738	0	0	6.3162
1177	ENSG00000236761	CTAGE9	34.5816	1.88159	0.8107	2.32095	0.0202896	0.377365	0	7.31653	5.39407	43.6983	6.52422	25.0242	132.195	30.143	24.9716	7.37672	71.2789	61.0566
1178	ENSG00000183734	ASCL2	69.1716	-1.3119	0.565264	-2.32085	0.0202947	0.377365	184.343	60.9711	139.167	123.291	52.1937	31.8489	5.39573	32.8833	46.3759	79.2998	23.7596	50.5296
1179	ENSG00000255182		34.5352	2.41965	1.04289	2.32014	0.0203335	0.377764	10.0734	2.43884	2.15763	5.46228	44.5821	0.758308	14.3886	69.877	245.257	1.84418	4.94992	12.6324
1180	ENSG00000135454	B4GALNT1	271.549	2.85593	1.23147	2.31913	0.0203882	0.37846	12.0881	7.31653	36.6797	28.8721	40.2327	269.958	21.5829	32.8833	356.738	2395.59	19.7997	36.8445
1181	ENSG00000232578		3.82651	-3.07966	1.32814	-2.31879	0.0204067	0.378483	2.01468	1.21942	26.9704	0.780326	1.08737	9.0997	0	0	0	2.76627	1.97997	0
1182	ENSG00000035499	DEPDC1B	38.6345	-1.12926	0.487205	-2.31784	0.0204579	0.379111	131.962	17.0719	59.3348	42.1376	33.7084	34.1239	38.6694	23.2923	27.6472	23.9743	14.8498	16.8432
1183	ENSG00000205669	ACOT6	17.7196	1.66218	0.717481	2.31668	0.0205209	0.379958	2.01468	14.6331	9.70933	7.02293	16.3105	1.51662	13.4893	87.6888	13.3777	14.7534	24.7496	7.3689
1184	ENSG00000271553		29.4448	-1.11339	0.480839	-2.31552	0.0205845	0.380491	30.2202	35.3632	34.5221	27.3114	43.4948	71.281	10.7915	5.48055	44.5922	14.7534	20.7897	14.7378
1185	ENSG00000267764		62.2246	1.79981	0.777221	2.31569	0.020575	0.380491	10.0734	30.4855	63.65	3.1213	57.6306	2.27492	160.973	47.9548	107.913	35.9615	210.867	15.7905
1186	ENSG00000204592	HLA-E	26941.6	-0.769435	0.33244	-2.3145	0.02064	0.380555	35294.2	32241.5	43881.8	33147.5	40157.6	19040.4	8477.59	13257.5	21580	29699.6	23343.8	23177.3
1187	ENSG00000169439	SDC2	2669.82	0.672338	0.290479	2.31459	0.0206356	0.380555	2046.92	1903.52	2375.55	1998.41	2350.89	1676.62	2973.05	5335.32	3031.38	3633.96	1457.26	3254.95
1188	ENSG00000067057	PFKP	4363.19	0.668336	0.288757	2.31452	0.0206391	0.380555	2847.75	3898.49	2000.12	4248.09	3155.55	4071.36	7303.12	4732.46	7765.29	4214.87	4625.21	3496.02
1189	ENSG00000129450	SIGLEC9	152.35	-0.940845	0.406662	-2.31358	0.0206908	0.38117	234.71	87.7983	397.004	198.983	181.591	101.613	74.6409	146.605	141.803	91.2869	57.4191	114.744
1190	ENSG00000064205	CCN5	382.149	3.60463	1.55909	2.312	0.0207774	0.382444	16.1175	42.6797	279.413	2.34098	1.08737	6.82477	142.088	2974.57	6.24291	1107.43	5.93991	1.0527
1191	ENSG00000065325	GLP2R	17.8236	4.80672	2.07938	2.31162	0.0207988	0.382516	2.01468	0	0	0	5.43685	0	146.584	16.4417	0	42.4161	0.989984	0
1192	ENSG00000182287	AP1S2	564.453	-0.743684	0.321913	-2.3102	0.020877	0.38267	842.137	586.542	1195.33	423.717	717.664	475.459	318.348	454.886	247.933	498.851	467.273	545.299
1193	ENSG00000147364	FBXO25	663.499	0.913565	0.395424	2.31034	0.0208692	0.38267	401.929	529.229	473.599	443.225	424.074	488.35	1018.89	1890.79	511.027	911.947	292.045	576.88
1194	ENSG00000225101	OR52K3P	13.4471	-1.83185	0.792917	-2.31026	0.0208736	0.38267	42.3083	12.1942	49.6255	11.7049	6.52422	3.03323	2.69786	16.4417	4.45922	0.92209	1.97997	9.4743
1195	ENSG00000127578	WFIKKN1	84.6731	1.53433	0.664109	2.31035	0.0208687	0.38267	4.02936	67.0682	24.8127	58.5244	47.8442	58.3897	206.836	172.637	51.727	230.523	83.1587	10.527
1196	ENSG00000168995	SIGLEC7	183.892	-0.994336	0.430524	-2.3096	0.0209105	0.382963	306.232	118.284	510.279	182.596	207.688	144.837	178.958	73.9874	169.45	128.171	51.4792	134.746
1197	ENSG00000224063	CALCRL-AS1	36.1894	2.08042	0.901359	2.30809	0.0209943	0.383664	3.02202	7.31653	38.8373	17.9475	13.0484	3.03323	209.534	47.9548	62.4291	24.8964	0.989984	5.2635
1198	ENSG00000173200	PARP15	45.591	-1.02752	0.445206	-2.30796	0.0210013	0.383664	93.6827	28.0467	115.433	56.9638	48.9316	24.2659	18.885	27.4028	40.133	44.2603	22.7696	26.3175
1199	ENSG00000100906	NFKBIA	3988.23	0.732779	0.317448	2.30834	0.0209801	0.383664	2727.88	3685.09	2458.62	2340.2	4528.89	2239.28	2987.43	7156.23	4299.58	5575.88	6877.42	2982.3
1200	ENSG00000128309	MPST	1913.73	0.861621	0.373575	2.30642	0.0210873	0.384913	940.856	2109.6	567.456	1544.27	1467.95	1521.92	2983.84	2906.06	2695.15	2442.62	2898.67	886.373
1201	ENSG00000069535	MAOB	3092.84	0.918491	0.398341	2.30579	0.0211224	0.385232	584.258	2899.78	3000.18	1835.33	2722.77	1799.46	3564.78	6836.99	3096.48	3735.39	4714.31	2324.36
1202	ENSG00000114923	SLC4A3	10.2057	1.86105	0.807663	2.30424	0.0212092	0.385962	7.05139	3.65826	0	3.90163	9.78632	2.27492	54.8566	2.74028	8.0266	13.8314	7.91987	8.4216
1203	ENSG00000213654	GPSM3	1546.08	-0.963743	0.418324	-2.30382	0.0212328	0.385962	3201.33	1123.09	3747.8	1599.67	1691.95	900.87	464.033	1098.85	1490.27	1310.29	691.009	1233.76
1204	ENSG00000266973		7.71386	1.78172	0.77335	2.3039	0.0212285	0.385962	3.02202	6.09711	1.07881	5.46228	5.43685	0	20.6836	8.22083	4.45922	2.76627	23.7596	11.5797
1205	ENSG00000234883	MIR155HG	186.795	-1.35418	0.587565	-2.30473	0.0211816	0.385962	638.654	41.4603	266.467	402.648	168.542	93.2719	166.368	147.975	132.885	59.9359	30.6895	92.6376
1206	ENSG00000167081	PBX3	213.561	-0.780068	0.33875	-2.30279	0.0212909	0.386696	361.635	118.284	322.565	188.059	231.61	397.353	149.282	115.092	105.238	203.782	194.037	175.801
1207	ENSG00000129465	RIPK3	22.7831	-0.973929	0.423072	-2.30204	0.0213329	0.386817	35.2569	14.6331	40.9949	43.6983	34.7958	12.1329	17.9858	9.59097	13.3777	19.3639	16.8297	14.7378
1208	ENSG00000124145	SDC4	5209.47	0.815467	0.354221	2.30214	0.0213273	0.386817	1781.99	3813.13	2605.34	4127.92	3224.05	7097.76	8196.11	6083.41	6432.87	7661.65	8105	3384.43
1209	ENSG00000234142	LINC01675	9.31547	-1.93034	0.839244	-2.30009	0.0214431	0.387211	17.1248	35.3632	11.867	7.02293	7.61158	9.0997	0	9.59097	0	0.92209	7.91987	5.2635
1210	ENSG00000225864		5.29003	-1.76934	0.76943	-2.29955	0.0214737	0.387211	15.1101	7.31653	9.70933	10.9246	4.34948	1.51662	1.79858	2.74028	0	1.84418	3.95994	4.2108
1211	ENSG00000232412	STAG2-AS1	66.9589	1.31823	0.573248	2.29958	0.021472	0.387211	19.1395	14.6331	51.7831	84.2752	32.6211	27.2991	241.009	20.5521	80.266	47.9487	70.2889	113.692
1212	ENSG00000006756	ARSD	1252.38	0.530295	0.230483	2.3008	0.0214027	0.387211	879.409	1465.74	1129.52	837.29	1100.42	737.834	1799.48	1501.67	1385.93	1100.98	1618.62	1471.67
1213	ENSG00000138182	KIF20B	101.338	-0.730311	0.317559	-2.29977	0.0214615	0.387211	159.16	56.0934	107.881	136.557	115.261	183.511	88.1302	52.0652	61.5372	74.6893	98.0084	83.1633
1214	ENSG00000259673	IQCH-AS1	298.012	0.74566	0.324275	2.29947	0.0214783	0.387211	238.74	249.981	332.275	155.285	159.843	200.952	598.027	205.521	413.816	236.977	424.703	360.023
1215	ENSG00000167065	DUSP18	41.4434	0.618694	0.268853	2.30123	0.0213785	0.387211	31.2276	20.7302	32.3644	36.6753	40.2327	34.1239	48.5616	61.6562	50.8351	58.0917	38.6094	44.2134
1216	ENSG00000270379	HEATR9	6.01338	-2.48184	1.07967	-2.29871	0.0215216	0.387673	14.1028	1.21942	19.4187	15.6065	10.8737	0	0.899288	1.37014	4.45922	0	0	4.2108
1217	ENSG00000273010		22.1366	1.03635	0.450974	2.29802	0.0215606	0.387977	14.1028	6.09711	19.4187	15.6065	9.78632	21.2326	20.6836	43.8444	24.0798	18.4418	54.4491	17.8959
1218	ENSG00000140968	IRF8	686.113	-1.09385	0.476045	-2.29779	0.0215739	0.387977	1266.23	297.539	1559.97	1193.9	932.963	356.405	276.081	261.696	738.447	584.605	196.017	569.511
1219	ENSG00000224609	FGGY-DT	69.1228	0.858401	0.37382	2.29629	0.0216591	0.388232	52.3817	57.3128	42.0738	58.5244	60.8927	24.2659	169.066	75.3576	85.617	52.5591	52.4692	98.9538
1220	ENSG00000157216	SSBP3	1027.87	0.819639	0.356914	2.29646	0.0216494	0.388232	516.766	1175.52	630.027	847.434	795.954	495.175	934.36	2547.09	1567.86	986.636	1069.18	768.471
1221	ENSG00000178922	HYI	1992.78	0.972527	0.423432	2.29678	0.0216315	0.388232	468.414	2460.79	1060.47	1626.2	1461.42	995.658	1098.03	3428.09	4058.78	1787.01	3410.5	2058.03
1222	ENSG00000101347	SAMHD1	1454.88	-0.852265	0.371003	-2.29719	0.0216078	0.388232	2801.42	729.214	2408.99	2245.78	2097.54	952.435	719.43	853.596	1236.1	1287.24	724.669	1402.2
1223	ENSG00000226193		111.753	1.29763	0.56519	2.29591	0.0216811	0.38831	58.4258	149.989	45.3102	36.6753	59.8053	37.9154	125.9	397.34	162.316	96.8195	149.488	21.054
1224	ENSG00000196126	HLA-DRB1	44442.9	-0.8907	0.388012	-2.29555	0.0217017	0.38836	74905.9	47535.5	89522.2	53961.9	34206.5	46322	10806.7	34490.5	28296.4	48823.8	19253.2	45190.3
1225	ENSG00000153956	CACNA2D1	198.3	-1.65422	0.721168	-2.29381	0.0218014	0.389107	5.0367	353.632	117.591	359.73	466.481	503.517	44.9644	45.2146	33.8901	247.12	78.2088	124.219
1226	ENSG00000286162		1061.14	1.87662	0.818204	2.29358	0.0218144	0.389107	164.197	897.494	815.583	449.468	280.541	118.296	321.945	5523.03	306.794	3284.49	80.1887	491.611
1227	ENSG00000149781	FERMT3	617.679	-0.909898	0.396605	-2.29422	0.021778	0.389107	1320.62	348.754	1030.27	939.512	791.605	407.211	226.621	253.476	597.536	601.203	406.884	488.453
1228	ENSG00000211802	TRAV22	11.5751	-2.3868	1.04039	-2.29415	0.021782	0.389107	15.1101	0	83.0687	3.1213	13.0484	2.27492	0	2.74028	2.67553	5.53254	3.95994	7.3689
1229	ENSG00000255135	EMSY-DT	249.495	0.778665	0.339639	2.29262	0.0218697	0.389776	193.409	115.845	293.437	198.983	151.144	149.387	337.233	328.833	228.312	141.08	392.034	464.241
1230	ENSG00000142484	TM4SF5	2275.34	1.47993	0.645631	2.29222	0.021893	0.389874	597.353	2638.83	566.377	785.788	2121.46	495.933	660.977	10276	1717.69	4443.55	1829.49	1170.6
1231	ENSG00000181631	P2RY13	231.151	-1.14216	0.498359	-2.29184	0.0219151	0.38995	536.913	118.284	576.087	235.658	258.794	182.752	42.2665	224.703	90.9681	261.874	96.0285	149.483
1232	ENSG00000168421	RHOH	253.147	-1.31009	0.572066	-2.29009	0.0220158	0.39079	652.757	167.061	795.086	191.18	214.212	144.079	26.9786	243.885	97.211	248.042	93.0585	164.221
1233	ENSG00000179344	HLA-DQB1	20532.8	-1.01974	0.445223	-2.2904	0.0219984	0.39079	31616.4	12873.4	60449.2	20404.7	17992.7	21673.2	5207.78	17318.5	17190.3	13284.6	7192.24	21190.9
1234	ENSG00000167117	ANKRD40CL	5.49198	3.89106	1.6989	2.29033	0.0220019	0.39079	3.02202	1.21942	0	0	0	0	14.3886	38.3639	0	0	8.90986	0
1235	ENSG00000232586	KIAA1614-AS1	41.1859	0.905977	0.396065	2.28744	0.0221699	0.392571	25.1835	52.4351	22.6551	37.4556	18.4853	15.9245	60.2523	76.7277	39.2411	50.715	26.7296	68.4255
1236	ENSG00000139618	BRCA2	46.2731	-0.792157	0.346267	-2.2877	0.0221548	0.392571	84.6166	43.8992	55.0195	67.8884	39.1453	61.4229	62.9502	30.143	22.2961	26.7406	31.6795	29.4756
1237	ENSG00000100600	LGMN	3927.6	-0.794858	0.347415	-2.28792	0.0221421	0.392571	4557.21	4999.63	8569.02	2852.09	5978.36	2942.24	4441.58	3154.06	1538.43	2925.79	2926.39	2246.46
1238	ENSG00000169242	EFNA1	6188.82	0.841897	0.368212	2.28645	0.0222281	0.392942	4578.36	6632.43	3264.49	5993.68	4109.17	2017.86	7255.46	9412.85	5596.32	12891.7	3687.69	8825.84
1239	ENSG00000163909	HEYL	649.865	1.33161	0.582794	2.28488	0.02232	0.392942	222.622	224.373	420.738	354.268	507.801	487.592	350.722	552.166	175.693	3220.86	658.34	623.198
1240	ENSG00000164307	ERAP1	1384.73	-0.751793	0.32877	-2.28668	0.0222145	0.392942	2367.25	964.562	1817.8	2792.01	1075.41	1408.18	1516.2	952.246	722.394	1165.52	1058.29	776.893
1241	ENSG00000066651	TRMT11	389.675	-0.460448	0.201542	-2.28463	0.0223344	0.392942	515.759	413.384	607.372	429.96	427.336	314.698	339.032	350.755	318.388	350.394	306.895	302.125
1242	ENSG00000158517	NCF1	93.9602	-1.2078	0.528439	-2.2856	0.0222775	0.392942	204.49	42.6797	267.546	115.488	101.125	55.3565	12.59	58.9159	61.5372	47.9487	52.4692	107.375
1243	ENSG00000224933	LINC01034	13.2287	6.22548	2.72448	2.28501	0.0223121	0.392942	0	0	2.15763	0	0	0	107.915	0	4.45922	0	0	44.2134
1244	ENSG00000166592	RRAD	1232.91	1.1612	0.50811	2.28533	0.0222936	0.392942	1001.3	988.95	792.928	537.645	384.929	865.988	3007.22	548.055	917.708	1485.49	3768.87	495.822
1245	ENSG00000264458		10.8654	-6.87039	3.0058	-2.28571	0.0222713	0.392942	36.2643	65.8487	0	0	28.2716	0	0	0	0	0	0	0
1246	ENSG00000130598	TNNI2	65.6004	-1.01867	0.445962	-2.28422	0.0223589	0.393057	144.05	60.9711	100.33	75.6916	106.562	39.432	17.0865	43.8444	66.8883	17.5197	48.5092	66.3201
1247	ENSG00000235997	LINC01936	32.227	1.72032	0.753322	2.28365	0.0223922	0.393327	2.01468	12.1942	16.1822	7.02293	19.5726	32.6072	68.3459	168.527	10.7021	21.2081	17.8197	10.527
1248	ENSG00000089041	P2RX7	227.464	-0.67819	0.297017	-2.28333	0.0224107	0.393336	334.437	120.723	252.443	323.055	243.571	404.936	188.85	171.267	218.502	180.73	141.568	149.483
1249	ENSG00000240429	LRRFIP1P1	12.3136	1.2011	0.526135	2.28288	0.0224374	0.39349	7.05139	6.09711	4.31526	11.7049	11.9611	3.79154	31.4751	9.59097	11.594	21.2081	7.91987	21.054
1250	ENSG00000129910	CDH15	6.30439	2.88771	1.26576	2.28141	0.022524	0.394693	5.0367	0	0	0	0	3.79154	41.3672	17.8118	1.78369	2.76627	0.989984	2.1054
1251	ENSG00000228296	TTTY4C	3.67288	5.35774	2.3496	2.28028	0.0225912	0.395553	0	0	0	0	0	0	0	0	0	0	18.8097	25.2648
1252	ENSG00000278954		9.48711	2.16337	0.948937	2.27979	0.0226204	0.395749	6.04405	0	7.5517	0.780326	1.08737	5.30816	17.9858	8.22083	56.1862	3.68836	5.93991	1.0527
1253	ENSG00000116830	TTF2	108.33	-0.728485	0.319592	-2.27942	0.022642	0.39581	163.189	60.9711	122.985	155.285	153.319	154.695	95.3245	71.2472	109.697	44.2603	74.2488	94.743
1254	ENSG00000004948	CALCR	116.484	2.04896	0.89906	2.279	0.0226669	0.39593	24.1762	56.0934	59.3348	18.7278	14.1358	99.3384	312.952	617.932	16.945	165.054	8.90986	4.2108
1255	ENSG00000162738	VANGL2	21.0086	1.89846	0.833223	2.27846	0.0226994	0.396182	13.0954	0	7.5517	8.58359	14.1358	9.858	66.5473	5.48055	3.56738	34.1173	4.94992	84.216
1256	ENSG00000186952	TMEM232	79.4587	-0.779886	0.342438	-2.27745	0.0227593	0.396911	118.866	103.651	90.6204	102.223	79.378	106.921	38.6694	80.8381	72.2394	25.8185	40.5894	93.6903
1257	ENSG00000258116	PPIAP45	36.4761	-3.52457	1.54784	-2.27708	0.0227812	0.396977	122.896	4.87768	208.211	35.1147	21.7474	9.858	0	0	0	5.53254	0	29.4756
1258	ENSG00000114757	PEX5L	9.06331	2.87152	1.2621	2.2752	0.0228939	0.397217	6.04405	0	0	0	0	6.82477	24.2808	0	8.91844	47.0266	1.97997	13.6851
1259	ENSG00000135077	HAVCR2	2144.56	-1.4605	0.641957	-2.27507	0.0229015	0.397217	2597.93	1773.04	3307.64	3517.71	1373.35	6306.09	1576.45	337.054	319.28	431.538	337.585	3857.09
1260	ENSG00000223813	PRR15-DT	7.50807	3.03895	1.33509	2.27622	0.0228327	0.397217	3.02202	4.87768	2.15763	0	0	0	63.8494	8.22083	1.78369	0.92209	0	5.2635
1261	ENSG00000107959	PITRM1	972.915	0.482879	0.212229	2.27527	0.0228897	0.397217	643.691	885.3	776.746	834.949	800.304	928.927	953.245	960.467	1194.18	1551.88	1297.87	847.424
1262	ENSG00000258922		5.65981	3.56926	1.569	2.27486	0.0229141	0.397217	0	0	1.07881	0	4.34948	0	0.899288	9.59097	43.7004	8.29881	0	0
1263	ENSG00000078804	TP53INP2	1147.9	0.738915	0.324633	2.27615	0.0228367	0.397217	733.344	719.458	519.988	1388.98	865.546	933.477	2472.14	965.947	1502.76	1463.36	1293.91	915.849
1264	ENSG00000268027		37.2744	-1.49918	0.659064	-2.27471	0.0229231	0.397217	99.7268	21.9496	118.67	37.4556	29.359	22.7492	13.4893	42.4743	6.24291	33.1952	1.97997	20.0013
1265	ENSG00000100243	CYB5R3	13224.8	0.784635	0.344981	2.27443	0.0229401	0.397217	7558.08	14233.1	9439.62	6900.42	9873.31	10283.4	12692.6	24403.5	13505.2	29681.2	8951.44	11175.5
1266	ENSG00000160799	CCDC12	1704.44	-0.532818	0.234377	-2.27334	0.0230056	0.397723	2334.01	2385.19	2318.37	1289.88	1593	2173.31	1044.07	1545.52	1136.21	1484.57	1453.3	1695.9
1267	ENSG00000125910	S1PR4	123.909	-0.962632	0.423417	-2.27348	0.022997	0.397723	194.417	115.845	217.92	204.445	148.97	101.613	30.5758	34.2534	115.94	137.391	62.369	123.166
1268	ENSG00000126882	FAM78A	254.496	-0.942362	0.414924	-2.27117	0.0231367	0.399673	506.693	154.866	511.358	365.973	296.852	172.894	80.9359	169.897	172.126	281.237	98.9984	242.121
1269	ENSG00000070190	DAPP1	87.4709	-1.14816	0.505806	-2.26996	0.0232099	0.400307	279.033	58.5322	167.216	71.79	101.125	45.4985	22.4822	57.5458	46.3759	67.3126	31.6795	101.059
1270	ENSG00000285347		7.78139	3.32	1.46243	2.2702	0.0231954	0.400307	0	0	1.07881	2.34098	1.08737	3.79154	0	0	27.6472	55.3254	0	2.1054
1271	ENSG00000143878	RHOB	6401.53	1.04033	0.458623	2.26838	0.0233062	0.401652	1859.55	4648.43	1901.95	6984.7	5471.64	4264.72	11591.8	5460	3644.97	8683.32	17589.1	4718.2
1272	ENSG00000058866	DGKG	86.559	0.952385	0.420097	2.26706	0.0233866	0.401947	102.749	74.3847	22.6551	28.8721	58.7179	66.7311	205.038	138.384	98.9947	84.8323	75.2388	82.1106
1273	ENSG00000286442		28.3693	2.72628	1.20233	2.26749	0.0233604	0.401947	0	31.7049	0	0	6.52422	6.82477	20.6836	5.48055	51.727	1.84418	201.957	13.6851
1274	ENSG00000119684	MLH3	361.414	0.569797	0.251277	2.2676	0.0233533	0.401947	217.586	364.607	187.714	276.235	346.871	352.613	496.407	456.256	287.174	486.864	459.353	405.29
1275	ENSG00000274565		6.54643	-2.1256	0.937669	-2.26689	0.0233968	0.401947	29.2129	6.09711	7.5517	8.58359	5.43685	6.82477	0	2.74028	0	3.68836	0	8.4216
1276	ENSG00000105767	CADM4	108.556	1.78054	0.785631	2.26638	0.0234283	0.402173	17.1248	35.3632	20.4975	31.213	28.2716	160.761	353.42	117.832	49.9433	449.058	12.8698	26.3175
1277	ENSG00000184985	SORCS2	130.393	2.41838	1.0675	2.26547	0.0234839	0.402812	189.38	9.75537	7.5517	10.9246	15.2232	13.6495	118.706	941.285	10.7021	230.523	13.8598	3.1581
1278	ENSG00000105851	PIK3CG	179.731	-0.83678	0.369425	-2.26509	0.0235074	0.4029	286.085	121.942	361.403	265.311	247.92	100.097	73.7416	123.312	154.289	168.742	96.0285	157.905
1279	ENSG00000157193	LRP8	46.9363	-1.29836	0.573695	-2.26316	0.0236258	0.404613	155.131	14.6331	89.5416	89.7375	28.2716	23.5075	44.0651	12.3312	26.7553	39.6499	22.7696	16.8432
1280	ENSG00000115107	STEAP3	583.713	1.71499	0.757913	2.26277	0.0236497	0.404706	937.834	96.3343	122.985	161.527	111.999	204.743	960.44	968.688	181.044	2835.43	343.525	80.0052
1281	ENSG00000095713	CRTAC1	20.3505	-1.74729	0.772678	-2.26134	0.0237382	0.405903	106.778	19.5107	17.261	3.1213	13.0484	28.8157	22.4822	1.37014	4.45922	8.29881	14.8498	4.2108
1282	ENSG00000186115	CYP4F2	80.9974	3.90801	1.72847	2.26096	0.0237617	0.405987	14.1028	8.53595	0	0	0	37.9154	285.074	449.405	2.67553	53.4812	120.778	0
1283	ENSG00000168490	PHYHIP	40.1226	2.00533	0.887175	2.26035	0.0237995	0.406317	6.04405	21.9496	7.5517	35.895	22.8348	1.51662	17.9858	268.547	65.9965	3.68836	16.8297	12.6324
1284	ENSG00000061656	SPAG4	3252.5	0.987619	0.437121	2.25937	0.0238601	0.407034	2254.43	3670.46	1985.02	994.135	1969.23	2211.23	4525.22	10048.6	2034.3	4329.21	2053.23	2954.93
1285	ENSG00000189221	MAOA	3191.11	1.71399	0.758754	2.25895	0.0238865	0.407167	1953.23	4160.66	787.534	451.809	126.135	1466.57	7721.29	11510.5	794.633	6931.35	1395.88	993.749
1286	ENSG00000269933		51.8746	1.99037	0.881452	2.25806	0.0239419	0.407504	1.00734	48.7768	4.31526	42.9179	13.0484	15.1662	1.79858	28.7729	162.316	66.3905	214.827	23.1594
1287	ENSG00000100911	PSME2	888.82	-0.718018	0.317986	-2.25802	0.0239445	0.407504	1895.82	963.343	1541.63	756.916	878.594	596.788	673.567	871.408	494.973	601.203	698.929	692.677
1288	ENSG00000100304	TTLL12	417.671	0.689277	0.305296	2.25774	0.0239621	0.407504	291.122	481.671	236.26	366.753	275.104	268.441	791.373	435.704	691.179	459.201	424.703	290.545
1289	ENSG00000135119	RNFT2	71.5794	-0.871599	0.386379	-2.25581	0.0240824	0.408915	77.5653	59.7516	113.275	98.3211	70.679	136.495	76.4395	20.5521	65.9965	72.8451	38.6094	28.4229
1290	ENSG00000177732	SOX12	549.554	0.668059	0.296124	2.25601	0.02407	0.408915	303.21	652.39	237.339	542.327	383.841	428.444	884	616.562	626.966	775.478	700.909	443.187
1291	ENSG00000138798	EGF	52.0401	-1.61767	0.717608	-2.25425	0.0241804	0.409945	42.3083	78.0429	57.1771	21.8491	122.873	148.628	6.29502	8.22083	4.45922	13.8314	20.7897	100.007
1292	ENSG00000185561	TLCD2	270.986	1.27114	0.563832	2.25446	0.0241671	0.409945	340.481	137.795	100.33	57.7441	105.475	210.81	383.097	458.996	280.039	891.661	230.666	54.7404
1293	ENSG00000233154	LINC01762	8.39342	1.97458	0.876256	2.25343	0.0242321	0.410215	1.00734	6.09711	3.23644	3.90163	6.52422	0	0	6.85069	27.6472	14.7534	13.8598	16.8432
1294	ENSG00000164007	CLDN19	16.9721	2.9959	1.32996	2.25263	0.0242828	0.410215	0	0	2.15763	11.7049	8.69895	0	5.39573	1.37014	12.4858	0	20.7897	141.062
1295	ENSG00000113231	PDE8B	42.7424	1.60356	0.711739	2.25301	0.0242584	0.410215	11.0808	12.1942	30.2068	36.6753	7.61158	28.8157	11.6907	87.6888	37.4575	150.301	96.0285	3.1581
1296	ENSG00000229628		146.026	1.86815	0.829473	2.25221	0.0243088	0.410215	11.0808	134.136	14.0246	3.1213	166.367	48.5317	66.5473	239.774	381.709	214.847	456.383	15.7905
1297	ENSG00000168004	PLAAT5	8.73123	-1.99456	0.885522	-2.25241	0.0242962	0.410215	16.1175	19.5107	17.261	24.9704	1.08737	4.54985	5.39573	5.48055	0	0	1.97997	8.4216
1298	ENSG00000183621	ZNF438	220.081	-0.683401	0.30333	-2.253	0.0242593	0.410215	367.679	208.521	363.56	209.908	254.444	222.184	134.893	276.768	100.778	165.976	142.558	193.697
1299	ENSG00000151572	ANO4	195.097	-1.79725	0.798104	-2.2519	0.0243287	0.410235	31.2276	217.057	113.275	210.688	36.9706	1208.74	182.555	39.734	19.6206	28.5848	82.1687	170.537
1300	ENSG00000152213	ARL11	110.038	-1.13939	0.506101	-2.25132	0.0243656	0.410541	219.6	110.967	310.698	77.2523	98.9506	90.2387	16.1872	108.241	49.9433	74.6893	41.5793	122.113
1301	ENSG00000228536	LYPLAL1-AS1	10.7182	3.16589	1.408	2.2485	0.0245443	0.411554	0	1.21942	2.15763	7.80326	0	1.51662	17.9858	0	0	1.84418	95.0385	1.0527
1302	ENSG00000224985		35.9764	1.1876	0.528189	2.24845	0.0245478	0.411554	21.1542	15.8525	11.867	35.895	16.3105	30.3323	135.792	16.4417	46.3759	28.5848	25.7396	47.3715
1303	ENSG00000185090	MANEAL	80.9717	1.52904	0.679706	2.24956	0.024477	0.411554	29.2129	4.87768	12.9458	15.6065	25.0095	161.52	200.541	94.5395	133.777	59.0138	168.297	66.3201
1304	ENSG00000136689	IL1RN	43.5759	-1.34744	0.599272	-2.24847	0.0245465	0.411554	72.5285	85.3595	98.1721	8.58359	88.0769	22.7492	34.1729	26.0326	6.24291	15.6755	15.8397	49.4769
1305	ENSG00000118507	AKAP7	205.443	-0.603385	0.26829	-2.249	0.0245122	0.411554	260.901	187.791	330.117	273.114	241.396	194.127	251.801	126.053	141.803	132.781	197.007	128.429
1306	ENSG00000106546	AHR	1451.9	-0.772959	0.343843	-2.248	0.024576	0.411554	1500.94	2815.64	988.194	1358.55	2821.72	1506.76	1511.7	927.583	1366.31	1142.47	586.071	896.9
1307	ENSG00000105808	RASA4	47.9586	-1.21864	0.542068	-2.24814	0.0245675	0.411554	97.7121	132.917	90.6204	16.3868	14.1358	50.8066	17.0865	34.2534	23.1879	31.3511	21.7797	45.2661
1308	ENSG00000132600	PRMT7	464.366	-0.477841	0.212404	-2.24967	0.0244696	0.411554	612.463	642.635	485.466	588.366	437.122	478.492	343.528	267.177	430.761	417.707	379.164	489.506
1309	ENSG00000207468	SNORA19	50.0225	1.07735	0.479392	2.24733	0.024619	0.411645	25.1835	46.338	37.7585	39.7966	34.7958	9.858	105.217	38.3639	75.8067	105.118	17.8197	64.2147
1310	ENSG00000268001	CARD8-AS1	151.092	-0.824402	0.366794	-2.24759	0.0246026	0.411645	198.446	257.298	300.989	111.587	169.63	120.571	71.943	154.826	49.9433	137.391	108.898	131.588
1311	ENSG00000172322	CLEC12A	236.7	-1.30893	0.582586	-2.24676	0.0246552	0.411936	594.331	132.917	597.663	167.77	453.433	77.3474	36.8708	195.93	243.473	64.5463	78.2088	197.908
1312	ENSG00000162496	DHRS3	4362.54	0.773531	0.344548	2.24506	0.0247642	0.412185	1706.44	5350.82	3101.59	2778.74	4008.04	2376.54	4161.01	7291.87	4656.32	8346.76	5514.21	3058.09
1313	ENSG00000128607	KLHDC10	1377.6	0.683721	0.304506	2.24534	0.0247461	0.412185	909.629	1184.06	613.845	1538.02	1010.17	1086.66	2556.68	1868.87	1241.45	2119.89	1333.51	1068.49
1314	ENSG00000257086		5.46572	1.62704	0.724452	2.2459	0.0247106	0.412185	0	0	6.47288	2.34098	3.26211	3.79154	3.59715	8.22083	7.13475	8.29881	10.8898	11.5797
1315	ENSG00000110245	APOC3	16.2631	2.51931	1.12184	2.24569	0.0247239	0.412185	1.00734	4.87768	18.3398	2.34098	1.08737	1.51662	11.6907	31.5132	26.7553	0	96.0285	0
1316	ENSG00000287335		113.099	2.16296	0.963261	2.24545	0.024739	0.412185	57.4184	29.2661	17.261	127.973	8.69895	6.82477	428.061	328.833	0.891844	255.419	4.94992	91.5849
1317	ENSG00000204472	AIF1	6478.55	-1.12393	0.500879	-2.24391	0.0248382	0.412785	17004.9	4766.72	16812.2	3682.36	6551.4	4472.5	1212.24	6653.39	2748.66	5270.67	3263.98	5303.5
1318	ENSG00000283415		3.8679	2.49056	1.11006	2.24362	0.0248568	0.412785	2.01468	0	4.31526	0	0	0.758308	4.49644	9.59097	8.91844	3.68836	0	12.6324
1319	ENSG00000167613	LAIR1	951.387	-0.945921	0.421602	-2.24364	0.0248558	0.412785	2176.86	493.866	2047.59	933.27	1229.81	633.946	323.744	776.868	669.775	1029.97	468.263	632.673
1320	ENSG00000166143	PPP1R14D	1281.99	2.18575	0.974572	2.24278	0.024911	0.413371	662.83	1358.44	416.422	1.56065	239.221	94.0302	861.518	3544.55	2860.14	4095	1237.48	12.6324
1321	ENSG00000136169	SETDB2	232.791	-0.474227	0.211506	-2.24214	0.0249521	0.413427	263.923	263.395	334.432	247.363	208.775	307.115	165.469	153.455	239.906	231.445	178.197	200.013
1322	ENSG00000167711	SERPINF2	9538.96	1.27525	0.56876	2.24217	0.0249507	0.413427	6098.44	4307	6682.17	7945.28	5653.23	2779.96	41927.5	13067	4738.37	13117.7	2578.91	5571.94
1323	ENSG00000226757	PP12613	8.85917	-2.63848	1.17715	-2.24142	0.0249986	0.413885	32.2349	0	32.3644	22.6295	2.17474	2.27492	4.49644	0	0	2.76627	0	7.3689
1324	ENSG00000159685	CHCHD6	560.482	-1.08702	0.48517	-2.24049	0.0250595	0.414266	1057.71	269.492	1735.81	168.55	596.966	744.658	401.082	361.716	439.679	201.016	372.234	376.867
1325	ENSG00000279207		121.875	0.950685	0.424304	2.24058	0.0250535	0.414266	65.4772	89.0177	43.1526	80.3736	123.96	97.0634	325.542	83.5784	230.988	79.2998	152.458	91.5849
1326	ENSG00000226812	R3HDML-AS1	3.64374	4.82876	2.15601	2.23967	0.0251122	0.414824	0	1.21942	0	0	0	0	0	0	36.5656	0	5.93991	0
1327	ENSG00000248749		3.62905	3.29788	1.47296	2.23895	0.0251589	0.414971	4.02936	0	0	0	0	0	8.09359	20.5521	3.56738	0	0.989984	6.3162
1328	ENSG00000134516	DOCK2	362.024	-0.937787	0.418828	-2.23907	0.0251512	0.414971	916.68	182.913	713.096	417.474	415.375	209.293	364.212	163.046	268.445	274.783	166.317	252.648
1329	ENSG00000142677	IL22RA1	236.867	1.33838	0.598115	2.23766	0.0252432	0.415025	24.1762	165.841	220.078	71.0097	154.406	169.861	213.131	896.07	154.289	485.019	214.827	73.689
1330	ENSG00000160883	HK3	85.1955	-0.882921	0.394483	-2.23817	0.0252097	0.415025	91.668	63.4099	201.738	164.649	75.0285	65.9728	57.5544	64.3965	39.2411	58.0917	40.5894	100.007
1331	ENSG00000227627		18.3909	-1.06512	0.47597	-2.23778	0.0252355	0.415025	30.2202	24.3884	45.3102	27.3114	8.69895	13.6495	20.6836	9.59097	8.0266	8.29881	11.8798	12.6324
1332	ENSG00000140511	HAPLN3	202.628	-1.20612	0.538984	-2.23777	0.0252359	0.415025	551.016	58.5322	378.664	310.57	123.96	273.749	100.72	61.6562	82.0497	272.939	53.4592	164.221
1333	ENSG00000091651	ORC6	70.196	-0.909129	0.406324	-2.23745	0.025257	0.415025	168.226	52.4351	96.0145	67.8884	36.9706	128.154	58.4537	34.2534	29.4309	62.7021	59.3991	48.4242
1334	ENSG00000206585	RNVU1-7	114.969	-1.52191	0.680715	-2.23575	0.025368	0.415259	200.461	114.626	456.338	151.383	77.2032	23.5075	18.885	19.1819	15.1613	118.028	56.4291	128.429
1335	ENSG00000173212	MAB21L3	33.5744	2.71841	1.21618	2.23521	0.0254036	0.415259	23.1688	4.87768	23.7339	0	0	1.51662	0	38.3639	5.35106	90.3648	203.937	11.5797
1336	ENSG00000044446	PHKA2	2011.99	0.634516	0.283794	2.23583	0.0253628	0.415259	1274.29	1375.51	1024.87	2512.65	1681.07	1590.17	3341.75	2362.12	3054.57	2390.06	1648.32	1888.54
1337	ENSG00000248503	C4orf46P2	3.78589	2.03056	0.908444	2.2352	0.0254039	0.415259	2.01468	1.21942	4.31526	0	0	1.51662	0.899288	6.85069	5.35106	10.143	8.90986	4.2108
1338	ENSG00000160446	ZDHHC12	1348.49	-0.52497	0.234863	-2.23522	0.0254029	0.415259	1262.2	1976.68	2049.75	1300.02	1291.79	1667.52	884	817.972	1133.53	1100.98	1456.27	1241.13
1339	ENSG00000244482	LILRA6	38.0291	-1.16822	0.522524	-2.23572	0.0253701	0.415259	58.4258	19.5107	89.5416	49.9409	82.6401	15.9245	32.3744	20.5521	29.4309	9.2209	10.8898	37.8972
1340	ENSG00000275464		52.191	0.998995	0.446876	2.23551	0.0253839	0.415259	36.2643	30.4855	26.9704	46.8196	8.69895	59.148	96.2238	31.5132	65.9965	111.573	50.4892	62.1093
1341	ENSG00000123106	CCDC91	1040.12	1.44584	0.647803	2.23192	0.0256206	0.418177	556.052	452.405	417.501	1183.75	414.288	326.831	2886.71	4283.05	388.844	272.939	964.245	334.759
1342	ENSG00000100284	TOM1	1991.95	0.57997	0.25983	2.23211	0.0256077	0.418177	1620.81	1984	1275.16	1592.65	1426.63	1681.17	2667.29	3840.5	1900.52	2393.75	2016.6	1504.31
1343	ENSG00000184208	C22orf46	170.849	0.710906	0.318587	2.23144	0.0256523	0.418382	159.16	82.9206	96.0145	155.285	181.591	102.372	167.268	235.664	312.145	270.172	129.688	157.905
1344	ENSG00000203950	RTL8A	3237.33	0.479738	0.215059	2.23072	0.0256994	0.418839	2588.87	3180.25	2920.35	2036.65	3002.23	2495.59	4220.36	5270.92	3148.21	2926.71	3381.79	3676.03
1345	ENSG00000052126	PLEKHA5	1007.37	0.870996	0.390735	2.22912	0.0258057	0.419632	455.318	996.267	337.669	940.293	678.518	865.229	1435.26	924.843	2114.56	1528.83	1346.38	465.293
1346	ENSG00000211897	IGHG3	2684.03	2.74539	1.23162	2.22909	0.025808	0.419632	1922.01	476.794	237.339	18.7278	701.353	823.523	920.871	20316.4	81.1578	83.9102	257.396	6368.84
1347	ENSG00000101115	SALL4	13.087	-2.21928	0.99571	-2.22884	0.0258247	0.419632	18.1321	6.09711	58.256	21.8491	10.8737	14.4079	14.3886	0	0	11.9872	0	1.0527
1348	ENSG00000235568	NFAM1	209.956	-0.841416	0.377496	-2.22894	0.0258182	0.419632	379.768	99.9925	414.265	230.196	292.502	200.193	89.0295	161.676	161.424	219.457	93.0585	177.906
1349	ENSG00000104321	TRPA1	95.8802	-1.75114	0.785842	-2.22836	0.0258563	0.419834	76.5579	301.197	73.3594	71.0097	115.261	249.483	26.0794	43.8444	42.8085	0	9.89984	141.062
1350	ENSG00000114455	HHLA2	1210.02	1.71938	0.771758	2.22787	0.0258892	0.420057	173.263	1353.56	119.748	44.4786	1524.49	167.586	2568.37	606.971	2610.43	859.388	3937.17	554.773
1351	ENSG00000261183	SPINT1-AS1	668.282	0.989809	0.444365	2.22747	0.025916	0.420181	327.386	498.743	829.608	259.849	473.006	298.015	1785.09	463.107	770.553	286.77	1067.2	960.062
1352	ENSG00000136158	SPRY2	271.272	-0.708355	0.318174	-2.22631	0.0259932	0.420818	204.49	292.661	345.221	380.799	418.637	377.637	97.1231	171.267	213.151	344.862	184.137	225.278
1353	ENSG00000260916	CCPG1	942.282	1.05427	0.473552	2.22631	0.0259937	0.420818	488.56	362.168	339.826	933.27	769.857	781.057	3354.34	1298.89	920.383	845.557	752.388	461.083
1354	ENSG00000199879	RNVU1-22	5.40922	-1.83072	0.823942	-2.22191	0.0262896	0.421712	6.04405	17.0719	16.1822	3.1213	3.26211	4.54985	1.79858	6.85069	0.891844	0	1.97997	3.1581
1355	ENSG00000115226	FNDC4	32.1923	1.84245	0.828322	2.22432	0.0261272	0.421712	28.2055	12.1942	14.0246	17.9475	4.34948	7.58308	191.548	26.0326	2.67553	65.4684	8.90986	7.3689
1356	ENSG00000173083	HPSE	150.172	-1.20514	0.542305	-2.22226	0.0262659	0.421712	197.439	40.2409	366.797	163.868	418.637	70.5226	107.015	49.325	100.778	171.509	64.349	51.5823
1357	ENSG00000223829		18.5708	3.03126	1.36435	2.22176	0.0262993	0.421712	0	0	20.4975	0.780326	0	3.03323	20.6836	142.494	0	24.8964	0.989984	9.4743
1358	ENSG00000187840	EIF4EBP1	3933.02	1.13861	0.512236	2.22283	0.0262275	0.421712	2895.1	3038.8	2900.93	1597.33	3247.97	1060.87	2441.57	15592.2	4869.47	4671.31	3250.12	1630.63
1359	ENSG00000172724	CCL19	55.102	-1.56357	0.703587	-2.22229	0.0262638	0.421712	187.365	2.43884	49.6255	33.554	117.436	103.13	10.7915	52.0652	21.4043	23.9743	8.90986	50.5296
1360	ENSG00000276842		14.6871	-1.60176	0.720227	-2.22397	0.0261504	0.421712	17.1248	47.5574	7.5517	24.9704	15.2232	20.4743	1.79858	0	16.0532	1.84418	8.90986	14.7378
1361	ENSG00000247498	GPRC5D-AS1	46.084	-2.14162	0.963153	-2.22356	0.0261783	0.421712	143.042	65.8487	37.7585	45.2589	23.9221	134.221	0	67.1368	0	21.2081	1.97997	12.6324
1362	ENSG00000176438	SYNE3	108.055	-0.885865	0.398443	-2.22332	0.0261945	0.421712	210.534	68.2876	217.92	168.55	105.475	70.5226	58.4537	80.8381	53.5106	135.547	55.4391	71.5836
1363	ENSG00000259481		3.72519	-2.39955	1.07869	-2.2245	0.0261147	0.421712	2.01468	8.53595	5.39407	0.780326	8.69895	12.1329	0	0	0.891844	0	0.989984	5.2635
1364	ENSG00000185338	SOCS1	206.249	-1.22791	0.552224	-2.22358	0.026177	0.421712	464.384	48.7768	131.615	542.327	439.297	108.438	207.736	52.0652	157.856	125.404	96.0285	101.059
1365	ENSG00000188522	FAM83G	46.5169	1.83134	0.823272	2.22446	0.0261174	0.421712	27.1982	14.6331	24.8127	26.5311	14.1358	15.1662	134.893	2.74028	7.13475	35.0394	247.496	8.4216
1366	ENSG00000277496	SLCO4A1-AS2	52.8887	1.09466	0.492659	2.22194	0.0262874	0.421712	65.4772	12.1942	39.9161	23.4098	43.4948	18.1994	26.0794	53.4354	149.83	59.0138	59.3991	84.216
1367	ENSG00000196155	PLEKHG4	245.119	1.27536	0.574104	2.22147	0.0263188	0.421717	115.844	114.626	112.197	204.445	105.475	207.018	233.815	348.015	790.174	563.397	31.6795	114.744
1368	ENSG00000108551	RASD1	627.705	1.21476	0.546916	2.22111	0.0263433	0.421801	260.901	212.179	268.625	363.632	628.499	533.849	483.817	1401.65	98.1028	1904.12	811.787	565.3
1369	ENSG00000154153	RETREG1	1788.75	1.04897	0.472454	2.22025	0.0264018	0.421861	1669.16	1268.2	1362.54	575.1	773.12	1346	1410.08	2967.72	2824.47	1418.17	5274.64	575.827
1370	ENSG00000280063		3.96607	-1.5674	0.70597	-2.22021	0.0264048	0.421861	7.05139	3.65826	4.31526	7.80326	6.52422	6.06646	3.59715	2.74028	0.891844	0.92209	2.96995	1.0527
1371	ENSG00000104894	CD37	1308.07	-0.987243	0.444656	-2.22024	0.0264023	0.421861	2677.51	921.882	3372.37	1120.55	1351.6	989.592	241.009	1068.71	898.087	1150.77	774.168	1130.6
1372	ENSG00000231028	AHI1-DT	60.3689	-0.98337	0.442991	-2.21984	0.0264297	0.42195	101.741	102.431	75.517	77.2523	70.679	53.8399	20.6836	19.1819	47.2677	44.2603	16.8297	94.743
1373	ENSG00000226004	LINC02528	16.564	-2.69491	1.21417	-2.21955	0.0264497	0.421962	101.741	0	38.8373	10.1442	17.3979	3.79154	0	8.22083	0	0	4.94992	13.6851
1374	ENSG00000176046	NUPR1	73.2259	1.16772	0.526451	2.2181	0.0265482	0.423225	13.0954	60.9711	59.3348	51.5015	44.5821	40.9486	33.2737	220.592	101.67	136.469	25.7396	90.5322
1375	ENSG00000112077	RHAG	4.62797	-4.16932	1.88096	-2.21659	0.0266514	0.424253	35.2569	0	4.31526	13.2655	0	0	2.69786	0	0	0	0	0
1376	ENSG00000225975	ZNF567-DT	119.001	0.790754	0.356713	2.21678	0.0266384	0.424253	65.4772	97.5537	86.3051	103.003	72.8537	97.8217	225.721	95.9097	75.8067	84.8323	190.077	232.647
1377	ENSG00000154198	CYP4Z2P	3.54385	2.51345	1.13438	2.2157	0.0267118	0.424601	0	3.65826	0	0.780326	2.17474	0	1.79858	12.3312	8.91844	0.92209	10.8898	1.0527
1378	ENSG00000259366		3.80788	-2.14447	0.967853	-2.2157	0.026712	0.424601	5.0367	12.1942	7.5517	2.34098	0	9.858	1.79858	4.11041	0.891844	0.92209	0.989984	0
1379	ENSG00000230098	TCERG1L-AS1	16.2936	2.6768	1.20849	2.215	0.0267597	0.424959	6.04405	3.65826	0	0	2.17474	14.4079	91.7274	6.85069	0.891844	60.8579	8.90986	0
1380	ENSG00000118308	IRAG2	472.987	1.14605	0.517449	2.21481	0.0267734	0.424959	309.254	356.071	359.245	223.173	307.726	211.568	234.714	331.573	1401.98	410.33	1369.15	161.063
1381	ENSG00000196998	WDR45	601.352	0.861112	0.388861	2.21445	0.026798	0.425043	512.737	390.215	214.684	597.73	533.898	313.181	1559.37	500.1	737.555	922.09	550.431	384.236
1382	ENSG00000158458	NRG2	49.1002	1.56466	0.707141	2.21266	0.0269214	0.426691	31.2276	10.9748	12.9458	7.80326	30.4463	55.3565	89.0295	1.37014	167.667	47.0266	90.0886	45.2661
1383	ENSG00000072864	NDE1	153.132	-0.590093	0.266827	-2.21152	0.027	0.427627	257.879	168.28	188.792	145.141	138.096	205.501	72.8423	142.494	148.046	146.612	104.938	118.955
1384	ENSG00000269113	TRABD2B	780.611	0.738236	0.33408	2.20976	0.0271218	0.428209	494.604	632.88	258.915	678.103	738.324	707.501	1619.62	1239.97	770.553	721.997	855.346	649.516
1385	ENSG00000180316	PNPLA1	24.749	2.10827	0.953739	2.21053	0.0270684	0.428209	21.1542	13.4136	4.31526	3.1213	14.1358	0	0.899288	97.2798	102.562	10.143	8.90986	21.054
1386	ENSG00000015285	WAS	474.35	-0.985355	0.445984	-2.20939	0.0271473	0.428209	1044.61	275.589	1164.04	602.412	470.831	224.459	139.39	326.093	313.037	464.733	272.246	394.763
1387	ENSG00000122694	GLIPR2	537.658	-0.895678	0.405298	-2.20993	0.0271103	0.428209	984.172	458.502	1171.59	469.756	773.12	339.722	276.081	282.248	247.933	715.542	240.566	492.664
1388	ENSG00000069493	CLEC2D	360.445	-0.812268	0.367659	-2.2093	0.0271541	0.428209	555.045	237.787	627.87	457.271	303.376	574.039	298.564	309.651	185.504	383.59	99.9884	292.651
1389	ENSG00000266402	SNHG25	15791	1.25246	0.566722	2.21001	0.0271041	0.428209	11815.1	7115.32	16732.4	10178.6	2483.55	7696.83	19325.7	9326.53	31802.3	7115.77	7424.88	58475.4
1390	ENSG00000225210	DUXAP9	23.3292	1.13478	0.514296	2.20646	0.0273515	0.431012	15.1101	20.7302	26.9704	8.58359	7.61158	9.0997	24.2808	36.9937	16.945	74.6893	16.8297	22.1067
1391	ENSG00000135148	TRAFD1	793.66	-0.614736	0.278665	-2.20601	0.0273835	0.431206	1271.26	576.786	1284.87	978.529	728.537	921.344	547.666	557.646	743.798	658.372	410.844	844.265
1392	ENSG00000223804		230.395	-1.46618	0.665062	-2.20458	0.0274834	0.43143	521.803	676.779	315.014	105.344	158.756	251.758	5.39573	312.391	147.154	139.236	57.4191	73.689
1393	ENSG00000213082	PPP1R14BP2	8.42381	3.3274	1.50991	2.20371	0.0275447	0.43143	3.02202	0	3.23644	0	2.17474	0.758308	27.8779	63.0263	0	0	0.989984	0
1394	ENSG00000198865	CCDC152	15.2254	-1.49484	0.678609	-2.2028	0.0276086	0.43143	34.2496	8.53595	45.3102	31.213	4.34948	11.3746	2.69786	2.74028	16.945	4.61045	5.93991	14.7378
1395	ENSG00000189077	TMEM120A	2476.91	0.666832	0.302731	2.20272	0.0276144	0.43143	1369.98	2532.74	1791.91	1350.74	2075.79	2365.16	1915.48	4610.51	2358.93	2117.12	4114.37	3120.2
1396	ENSG00000252316	RNY4	182.292	0.635456	0.288325	2.20396	0.0275274	0.43143	123.903	163.402	170.453	198.983	90.2516	109.955	207.736	197.3	290.741	303.368	152.458	178.959
1397	ENSG00000123453	SARDH	224.147	1.3872	0.629484	2.20371	0.0275447	0.43143	68.4992	18.2913	48.5466	231.757	164.193	211.568	181.656	902.921	245.257	373.447	125.728	117.902
1398	ENSG00000107798	LIPA	3081.39	-0.711754	0.322753	-2.20526	0.027436	0.43143	3559.94	2901	6743.67	2080.35	4952.97	2721.57	2931.68	1752.41	1843.44	2218.55	2205.69	3065.46
1399	ENSG00000226009	KCNIP2-AS1	20.3134	-1.21319	0.550733	-2.20287	0.0276036	0.43143	27.1982	21.9496	65.8077	11.7049	13.0484	31.0906	11.6907	6.85069	11.594	27.6627	9.89984	5.2635
1400	ENSG00000110881	ASIC1	7.36762	1.85411	0.84154	2.20323	0.0275785	0.43143	7.05139	0	4.31526	2.34098	0	5.30816	8.99288	1.37014	13.3777	30.429	8.90986	6.3162
1401	ENSG00000110921	MVK	2173.26	1.37703	0.625015	2.20319	0.0275811	0.43143	971.077	2901	387.294	375.337	972.108	1643.25	8421.83	2407.33	1602.64	838.18	4589.57	969.537
1402	ENSG00000185480	PARPBP	39.8749	-0.734195	0.333206	-2.20342	0.0275649	0.43143	71.5212	36.5826	65.8077	36.6753	36.9706	50.8066	22.4822	38.3639	23.1879	40.572	20.7897	34.7391
1403	ENSG00000282057		12.0875	1.17733	0.534797	2.20145	0.027704	0.432522	13.0954	0	8.63051	9.36391	5.43685	7.58308	12.59	12.3312	15.1613	25.8185	11.8798	23.1594
1404	ENSG00000138738	PRDM5	60.3179	1.06769	0.485098	2.20097	0.0277382	0.432748	8.05873	24.3884	62.5712	35.1147	40.2327	62.9396	118.706	115.092	63.3209	30.429	102.958	60.0039
1405	ENSG00000121152	NCAPH	50.6528	-1.16414	0.529137	-2.20007	0.0278023	0.432822	165.204	28.0467	86.3051	55.4031	53.2811	32.6072	31.4751	9.59097	19.6206	67.3126	32.6695	26.3175
1406	ENSG00000278898		3.56985	5.31835	2.41705	2.20035	0.0277821	0.432822	0	0	0	0	0	0	0	4.11041	0	38.7278	0	0
1407	ENSG00000101440	ASIP	60.7403	1.36196	0.619036	2.20013	0.0277977	0.432822	56.4111	17.0719	43.1526	29.6524	35.8832	21.9909	46.763	126.053	41.9167	267.406	25.7396	16.8432
1408	ENSG00000163331	DAPL1	3.66331	-2.48611	1.13055	-2.19903	0.0278756	0.433656	19.1395	4.87768	4.31526	2.34098	0	6.82477	2.69786	0	1.78369	0	1.97997	0
1409	ENSG00000203999	LINC01270	41.1705	1.65039	0.750616	2.19871	0.0278987	0.433707	14.1028	14.6331	52.8619	7.80326	17.3979	12.8912	57.5544	47.9548	16.0532	232.367	9.89984	10.527
1410	ENSG00000253304	TMEM200B	201.374	0.764366	0.347804	2.19769	0.0279713	0.434308	93.6827	259.737	111.118	123.291	103.3	204.743	268.887	242.514	418.275	213.003	215.817	162.116
1411	ENSG00000144815	NXPE3	173.744	-0.697252	0.317277	-2.19761	0.027977	0.434308	200.461	158.525	288.043	158.406	234.872	249.483	250.002	135.644	97.211	117.105	93.0585	102.112
1412	ENSG00000171840	NINJ2	118.986	-0.985904	0.448853	-2.1965	0.0280564	0.434616	238.74	82.9206	320.408	99.8817	139.183	67.4894	31.4751	102.76	67.7801	106.962	71.2789	98.9538
1413	ENSG00000108669	CYTH1	523.87	-0.507842	0.231196	-2.19659	0.02805	0.434616	758.528	465.819	675.338	798.273	553.471	439.819	418.169	352.125	445.922	563.397	402.924	412.658
1414	ENSG00000126337	KRT36	6.29464	-1.63125	0.742574	-2.19676	0.0280378	0.434616	11.0808	8.53595	20.4975	0.780326	10.8737	5.30816	1.79858	5.48055	4.45922	3.68836	1.97997	1.0527
1415	ENSG00000073670	ADAM11	11.4746	1.56875	0.714427	2.19582	0.0281051	0.435063	4.02936	8.53595	3.23644	5.46228	1.08737	12.1329	9.89217	20.5521	29.4309	35.0394	1.97997	6.3162
1416	ENSG00000148297	MED22	235.066	-0.689202	0.31392	-2.19547	0.0281298	0.435138	199.454	284.125	197.423	483.802	191.377	384.462	198.743	121.942	152.505	175.197	197.007	234.752
1417	ENSG00000142949	PTPRF	2026.87	0.666079	0.303461	2.19494	0.0281679	0.43531	1096.99	1809.62	1532.99	1263.35	1501.66	2197.58	1682.57	3551.4	2608.64	3666.23	1816.62	1594.84
1418	ENSG00000172425	TTC36	19.0027	1.31005	0.597045	2.19423	0.0282189	0.43531	9.06607	18.2913	3.23644	10.9246	16.3105	7.58308	17.9858	75.3576	27.6472	22.1302	7.91987	11.5797
1419	ENSG00000226210	WASH8P	307.989	-0.978529	0.44596	-2.19421	0.0282204	0.43531	503.67	241.445	379.743	738.969	162.018	426.169	237.412	71.2472	368.332	204.704	115.828	246.332
1420	ENSG00000170779	CDCA4	115.575	-0.597187	0.272147	-2.19435	0.0282102	0.43531	144.05	154.866	151.034	114.708	143.533	127.396	92.6267	84.9486	69.5638	153.067	57.4191	93.6903
1421	ENSG00000230266	XXYLT1-AS2	11.5025	-1.94102	0.88508	-2.19305	0.0283041	0.436294	19.1395	1.21942	32.3644	32.7737	16.3105	7.58308	3.59715	4.11041	0	8.29881	0	12.6324
1422	ENSG00000271797		17.5289	-1.12224	0.51208	-2.19153	0.0284136	0.436486	39.2863	12.1942	36.6797	14.0459	16.3105	25.7825	19.7843	6.85069	8.91844	3.68836	8.90986	17.8959
1423	ENSG00000224557	HLA-DPB2	91.1195	-1.44957	0.661539	-2.19122	0.0284361	0.436486	168.226	68.2876	384.058	38.236	64.1548	77.3474	2.69786	60.2861	36.5656	66.3905	86.1286	41.0553
1424	ENSG00000233539		8.7413	3.30084	1.50594	2.19187	0.0283886	0.436486	2.01468	0	5.39407	0	0	2.27492	13.4893	1.37014	0	79.2998	0	1.0527
1425	ENSG00000000005	TNMD	18.9334	-2.46315	1.12401	-2.1914	0.028423	0.436486	9.06607	141.453	23.7339	0	9.78632	8.34139	0.899288	2.74028	0	1.84418	18.8097	10.527
1426	ENSG00000158079	PTPDC1	107.731	-0.750601	0.34243	-2.19198	0.0283806	0.436486	77.5653	146.331	65.8077	234.878	109.824	175.927	92.6267	73.9874	69.5638	75.6114	98.0084	72.6363
1427	ENSG00000170955	CAVIN3	2503.44	0.628461	0.28673	2.19182	0.0283927	0.436486	1918.98	2343.73	1466.11	1837.67	2478.11	1756.24	3583.66	2342.94	4205.04	4235.16	1916.61	1956.97
1428	ENSG00000198829	SUCNR1	64.3058	-1.30829	0.59738	-2.19005	0.0285203	0.437	62.4551	15.8525	81.9899	83.4949	251.182	54.5982	26.0794	58.9159	76.6986	28.5848	12.8698	18.9486
1429	ENSG00000168993	CPLX1	48.1178	0.972055	0.443931	2.18965	0.0285493	0.437	19.1395	45.1186	29.128	21.0688	33.7084	47.0151	40.468	49.325	45.484	94.9753	126.718	25.2648
1430	ENSG00000177679	SRRM3	44.8433	2.07087	0.945752	2.18965	0.0285494	0.437	5.0367	28.0467	1.07881	6.24261	15.2232	47.7734	125.001	13.7014	230.096	54.4033	0.989984	10.527
1431	ENSG00000141506	PIK3R5	199.694	-0.826151	0.377181	-2.19033	0.0285005	0.437	330.408	107.309	345.221	307.448	278.367	163.795	82.7345	104.13	190.855	245.276	120.778	120.008
1432	ENSG00000166432	ZMAT1	263.309	0.591749	0.270319	2.18908	0.0285911	0.437332	233.703	186.571	175.847	282.478	206.6	174.411	465.831	385.009	270.229	225.912	208.887	344.233
1433	ENSG00000287138		5.52851	-3.94104	1.80128	-2.18791	0.0286761	0.43802	0	46.338	0	0	15.2232	0.758308	0	0	0	0	2.96995	1.0527
1434	ENSG00000100116	GCAT	325.664	0.836313	0.382206	2.18812	0.028661	0.43802	116.852	204.863	151.034	319.153	188.115	421.619	399.284	639.854	528.864	425.084	206.907	306.336
1435	ENSG00000163947	ARHGEF3	372.512	-0.690043	0.315515	-2.18703	0.02874	0.438691	655.779	313.391	650.525	452.589	424.074	263.891	274.283	231.553	242.582	474.876	228.686	257.912
1436	ENSG00000184995	IFNE	4.57994	2.1737	0.994498	2.18572	0.0288359	0.439028	2.01468	0	6.47288	1.56065	0	0	3.59715	12.3312	13.3777	8.29881	0.989984	6.3162
1437	ENSG00000102445	RUBCNL	86.7979	-0.96166	0.43984	-2.18639	0.0287874	0.439028	138.006	62.1905	182.32	120.17	127.222	58.3897	35.0722	58.9159	48.1596	119.872	21.7797	69.4782
1438	ENSG00000179965	ZNF771	142.375	0.971777	0.444534	2.18606	0.0288114	0.439028	47.345	217.057	96.0145	68.6687	81.5527	67.4894	173.563	130.163	415.599	126.326	158.397	126.324
1439	ENSG00000232388	SMIM26	884.798	0.831637	0.380501	2.18564	0.0288423	0.439028	616.493	504.84	331.196	788.91	812.265	765.891	2471.24	780.979	1094.29	884.284	985.034	582.143
1440	ENSG00000127191	TRAF2	524.504	-0.700411	0.320655	-2.18432	0.028939	0.440194	382.79	415.823	603.057	1210.29	550.209	733.284	323.744	369.937	485.163	293.225	429.653	496.874
1441	ENSG00000143641	GALNT2	1030.49	0.948886	0.434671	2.183	0.0290359	0.441056	996.26	520.693	936.411	775.644	555.646	435.269	1737.42	1723.63	530.647	2771.8	692.989	689.519
1442	ENSG00000163607	GTPBP8	278.999	-0.714338	0.327222	-2.18304	0.0290332	0.441056	427.113	326.805	610.609	256.727	285.978	172.894	195.146	252.105	163.207	159.522	216.807	281.071
1443	ENSG00000271320		9.8336	1.80967	0.829557	2.18149	0.0291474	0.441466	2.01468	0	7.5517	2.34098	13.0484	1.51662	16.1872	9.59097	18.7287	38.7278	1.97997	6.3162
1444	ENSG00000121552	CSTA	1098.65	-1.07645	0.493553	-2.18103	0.0291812	0.441466	2850.77	826.767	2785.5	740.529	1248.3	491.384	218.527	602.861	836.55	866.765	649.43	1066.39
1445	ENSG00000227765	MYL12BP2	3.39702	-2.81844	1.29227	-2.18099	0.0291838	0.441466	6.04405	1.21942	12.9458	10.1442	0	5.30816	0	0	0.891844	0	0	4.2108
1446	ENSG00000170458	CD14	4004	-0.922582	0.42282	-2.18197	0.0291116	0.441466	5905.03	3949.7	10107.4	2955.09	5295.49	3241.01	1735.63	4259.76	1813.12	4773.66	1191.94	2820.18
1447	ENSG00000146233	CYP39A1	55.0522	-1.37606	0.630736	-2.18168	0.0291331	0.441466	192.402	13.4136	47.4678	134.996	25.0095	63.6979	28.7772	19.1819	63.3209	28.5848	6.92989	36.8445
1448	ENSG00000188488	SERPINA5	17.1974	1.70697	0.782289	2.18202	0.0291082	0.441466	27.1982	3.65826	3.23644	2.34098	9.78632	2.27492	17.0865	34.2534	3.56738	43.3382	5.93991	53.6877
1449	ENSG00000163808	KIF15	24.0788	-1.1501	0.527409	-2.18065	0.0292092	0.441544	69.5065	17.0719	37.7585	28.8721	27.1842	18.1994	13.4893	31.5132	7.13475	23.0523	9.89984	5.2635
1450	ENSG00000234952	LINC02674	11.0338	2.65381	1.21723	2.18021	0.0292422	0.441739	0	1.21942	2.15763	7.80326	2.17474	4.54985	8.99288	0	0.891844	0	43.5593	61.0566
1451	ENSG00000152969	JAKMIP1	6.47089	-1.85716	0.852243	-2.17914	0.0293213	0.442629	16.1175	2.43884	11.867	20.2885	3.26211	6.82477	0	2.74028	7.13475	2.76627	0	4.2108
1452	ENSG00000115457	IGFBP2	578.758	2.12886	0.977336	2.17823	0.0293888	0.442846	58.4258	404.848	125.142	166.99	150.057	386.737	86.3317	4470.76	26.7553	933.155	114.838	21.054
1453	ENSG00000181104	F2R	1510.59	1.38278	0.634852	2.17812	0.0293972	0.442846	812.924	1260.88	819.899	788.129	676.344	666.553	678.962	2763.57	418.275	7828.55	876.136	536.877
1454	ENSG00000270050		9.74113	1.44425	0.662992	2.17839	0.0293773	0.442846	9.06607	2.43884	7.5517	7.80326	2.17474	2.27492	13.4893	9.59097	10.7021	11.9872	2.96995	36.8445
1455	ENSG00000185837	HDHD5-AS1	97.1094	0.869652	0.399315	2.17786	0.0294166	0.442846	53.3891	71.9458	80.9111	63.9867	100.038	42.4652	214.93	104.13	105.238	84.8323	45.5393	197.908
1456	ENSG00000197959	DNM3	60.1885	-0.844642	0.387996	-2.17694	0.0294853	0.443199	69.5065	151.208	72.2805	65.5474	50.019	56.1148	22.4822	28.7729	41.9167	71.0009	37.6194	55.7931
1457	ENSG00000143110	C1orf162	2636.59	-1.07915	0.496015	-2.17565	0.0295817	0.443199	6882.15	1296.24	6682.17	2497.82	2961.99	1154.14	751.805	2549.83	1346.68	2525.6	1115.71	1874.86
1458	ENSG00000255833	TIFAB	21.1387	-1.6776	0.771038	-2.17577	0.0295723	0.443199	91.668	7.31653	39.9161	16.3868	25.0095	12.8912	2.69786	5.48055	10.7021	1.84418	3.95994	35.7918
1459	ENSG00000147872	PLIN2	37021	1.19667	0.54966	2.17711	0.0294722	0.443199	11802	51687.6	11792.5	20500.7	28927.3	10234.9	26325.8	130112	25351.6	52191.2	59973.3	15352.6
1460	ENSG00000137491	SLCO2B1	1492.73	-1.08953	0.500765	-2.17573	0.0295757	0.443199	3095.56	3721.67	2459.7	740.529	1235.25	934.235	346.226	648.075	1055.05	2054.42	1050.37	571.616
1461	ENSG00000259166		9.68771	5.17544	2.37875	2.1757	0.029578	0.443199	2.01468	0	1.07881	0	0	0	0	72.6173	0.891844	39.6499	0	0
1462	ENSG00000268189		16.0657	1.00178	0.460276	2.17647	0.02952	0.443199	14.1028	7.31653	6.47288	13.2655	8.69895	13.6495	6.29502	30.143	30.3227	17.5197	20.7897	24.2121
1463	ENSG00000196187	TMEM63A	509.697	0.815024	0.374682	2.17524	0.0296121	0.443351	324.364	223.154	230.866	519.697	518.675	399.628	434.356	246.625	816.929	607.657	937.515	856.898
1464	ENSG00000131480	AOC2	20.1217	1.08091	0.497043	2.17469	0.0296535	0.443668	16.1175	14.6331	9.70933	7.02293	9.78632	20.4743	32.3744	8.22083	34.7819	32.2732	45.5393	10.527
1465	ENSG00000179921	GPBAR1	31.2872	-1.21564	0.559348	-2.17332	0.0297559	0.444897	61.4478	10.9748	47.4678	88.1768	31.5337	22.7492	7.1943	12.3312	21.4043	29.5069	7.91987	34.7391
1466	ENSG00000121769	FABP3	10676.4	1.24285	0.572184	2.17211	0.0298471	0.445095	2318.9	10359	6686.49	1817.38	12161.1	4712.13	10389.5	38776.3	5783.61	8232.42	20526.3	6354.1
1467	ENSG00000163531	NFASC	156.651	1.25225	0.57652	2.17209	0.0298486	0.445095	41.301	42.6797	44.2314	132.655	141.358	153.178	186.153	105.501	74.0231	612.268	81.1787	265.28
1468	ENSG00000187764	SEMA4D	783.564	-0.71861	0.330848	-2.17203	0.0298537	0.445095	1040.58	736.53	1061.55	1545.83	848.148	616.504	747.308	284.989	646.587	386.356	716.749	771.629
1469	ENSG00000234203		16.2377	1.10164	0.507246	2.1718	0.0298708	0.445095	6.04405	13.4136	8.63051	7.80326	16.3105	9.858	11.6907	32.8833	37.4575	7.37672	29.6995	13.6851
1470	ENSG00000267328		4.40009	2.12094	0.976289	2.17245	0.0298219	0.445095	1.00734	0	2.15763	2.34098	1.08737	3.03323	2.69786	4.11041	0	22.1302	7.91987	6.3162
1471	ENSG00000163328	GPR155	265.978	-1.20938	0.556951	-2.17142	0.0298992	0.445216	401.929	296.319	237.339	1038.61	139.183	114.505	52.1587	153.455	223.853	214.847	74.2488	245.279
1472	ENSG00000196872	CRACDL	190.671	0.958418	0.441519	2.17073	0.0299516	0.445693	136.998	115.845	91.6992	154.505	181.591	97.0634	473.025	197.3	164.099	452.746	149.488	73.689
1473	ENSG00000077713	SLC25A43	395.81	0.656866	0.302713	2.16993	0.0300124	0.4462	257.879	365.826	196.344	357.389	399.065	266.924	566.551	622.043	651.046	446.292	377.184	243.174
1474	ENSG00000166825	ANPEP	7353.04	1.03283	0.476017	2.16974	0.0300264	0.4462	1357.9	8020.13	2791.97	3312.48	8336.86	5148.91	18684.5	8652.42	14274	5844.21	6585.38	5227.71
1475	ENSG00000223609	HBD	125.495	-4.09601	1.88806	-2.16943	0.03005	0.446248	892.504	0	264.309	264.53	0	1.51662	74.6409	2.74028	2.67553	0.92209	0	2.1054
1476	ENSG00000120802	TMPO	806.742	-0.40887	0.188533	-2.16869	0.0301064	0.446574	956.974	788.965	741.145	1072.95	1013.43	947.885	762.596	687.809	750.933	729.373	493.012	735.837
1477	ENSG00000154856	APCDD1	128.581	0.87963	0.40562	2.1686	0.0301127	0.446574	58.4258	45.1186	75.517	147.482	146.795	69.7643	225.721	132.903	90.9681	272.017	177.207	101.059
1478	ENSG00000124104	SNX21	279.065	0.677723	0.312619	2.16789	0.0301671	0.447077	199.454	145.111	160.743	245.022	208.775	328.347	449.644	294.58	325.523	532.968	221.756	236.858
1479	ENSG00000287078		61.4031	1.08247	0.499415	2.16747	0.0301988	0.447244	9.06607	36.5826	47.4678	74.9113	36.9706	31.0906	78.2381	67.1368	136.452	23.9743	63.359	131.588
1480	ENSG00000112742	TTK	26.28	-1.07375	0.495586	-2.16663	0.030263	0.447893	82.602	14.6331	23.7339	28.8721	26.0969	37.9154	16.1872	10.9611	15.1613	24.8964	6.92989	27.3702
1481	ENSG00000152359	POC5	231.418	-0.725312	0.334823	-2.16626	0.0302914	0.447915	381.782	198.766	387.294	230.976	180.503	350.338	252.7	238.404	136.452	139.236	91.0786	189.486
1482	ENSG00000169895	SYAP1	1352.29	0.678621	0.313299	2.16605	0.0303077	0.447915	1159.45	1053.58	1049.69	1120.55	1002.55	854.613	3488.34	1366.03	1323.5	1401.58	1378.06	1029.54
1483	ENSG00000258818	RNASE4	33.9186	1.14702	0.529602	2.16581	0.0303259	0.447915	9.06607	23.169	4.31526	15.6065	45.6695	28.8157	89.9288	57.5458	32.9982	34.1173	41.5793	24.2121
1484	ENSG00000158195	WASF2	1671.88	0.322895	0.14914	2.16504	0.0303845	0.447973	1247.09	1682.8	1418.64	1385.08	1678.9	1502.21	1718.54	1663.35	2020.92	1869.08	1862.16	2013.82
1485	ENSG00000119969	HELLS	128.803	-0.761611	0.351806	-2.16486	0.0303984	0.447973	237.732	62.1905	122.985	160.747	145.707	242.659	71.943	68.5069	104.346	120.794	122.758	85.2687
1486	ENSG00000246877	DNM1P35	23.3768	1.15536	0.533731	2.16469	0.0304116	0.447973	2.01468	26.8273	6.47288	19.5081	14.1358	18.1994	44.9644	13.7014	49.0514	38.7278	23.7596	23.1594
1487	ENSG00000198182	ZNF607	83.9798	-0.50963	0.235368	-2.16525	0.0303687	0.447973	100.734	85.3595	85.2263	85.8359	102.213	132.704	55.7559	54.8055	82.0497	82.066	67.3189	73.689
1488	ENSG00000250590	LINC02492	24.4265	5.35867	2.47687	2.16348	0.0305041	0.448929	0	0	0	0	0	6.82477	32.3744	242.514	0	6.45463	4.94992	0
1489	ENSG00000214575	CPEB1	17.9236	2.80636	1.29726	2.16331	0.0305175	0.448929	1.00734	2.43884	5.39407	0	1.08737	16.6828	21.5829	150.715	12.4858	3.68836	0	0
1490	ENSG00000122126	OCRL	342.191	0.552332	0.25542	2.16244	0.030584	0.449605	260.901	229.251	235.181	355.048	314.25	269.958	562.055	400.08	368.332	538.501	297.985	274.755
1491	ENSG00000197106	SLC6A17	4.68166	3.33114	1.5415	2.16097	0.0306976	0.450213	0	0	1.07881	0	0	3.79154	4.49644	1.37014	0	14.7534	30.6895	0
1492	ENSG00000143889	HNRNPLL	453.605	-0.560482	0.259509	-2.15978	0.0307898	0.450213	677.94	318.269	699.072	575.1	567.607	405.695	356.118	379.528	328.199	493.318	278.186	364.234
1493	ENSG00000231185	SPRY4-AS1	12.9395	1.2976	0.600587	2.16055	0.0307298	0.450213	6.04405	4.87768	4.31526	7.02293	10.8737	11.3746	35.0722	28.7729	3.56738	5.53254	17.8197	20.0013
1494	ENSG00000128578	STRIP2	40.5856	1.38001	0.638939	2.15985	0.0307847	0.450213	19.1395	18.2913	28.0492	24.9704	15.2232	29.574	217.628	15.0715	32.9982	36.8836	37.6194	11.5797
1495	ENSG00000251869	SCARNA23	51.0854	1.64769	0.762645	2.16049	0.0307344	0.450213	26.1909	35.3632	10.7881	25.7508	44.5821	6.06646	312.952	9.59097	40.133	50.715	10.8898	40.0026
1496	ENSG00000287024		471.966	0.912681	0.422267	2.16138	0.0306657	0.450213	340.481	252.42	548.038	188.839	481.705	153.937	1087.24	702.881	548.484	363.304	259.376	736.89
1497	ENSG00000185267	CDNF	87.3182	1.07585	0.497919	2.16068	0.0307198	0.450213	101.741	48.7768	46.389	52.2818	36.9706	50.8066	152.879	137.014	90.0763	11.9872	167.307	151.589
1498	ENSG00000278847		9.37339	2.43422	1.12688	2.16014	0.0307621	0.450213	5.0367	1.21942	0	1.56065	4.34948	5.30816	30.5758	0	1.78369	0	24.7496	37.8972
1499	ENSG00000158793	NIT1	1618.61	0.494368	0.229017	2.15865	0.0308774	0.450729	1292.42	1685.24	1476.9	1347.62	1338.55	923.619	1174.47	2126.45	1751.58	2017.53	2174.01	2114.87
1500	ENSG00000137198	GMPR	96.3215	-1.11336	0.515748	-2.15874	0.0308705	0.450729	132.969	89.0177	212.526	216.931	52.1937	87.2054	118.706	16.4417	41.0248	50.715	29.6995	108.428
1501	ENSG00000182487	NCF1B	55.9119	-1.09246	0.506111	-2.15853	0.0308868	0.450729	86.6313	28.0467	170.453	77.2523	53.2811	40.9486	14.3886	34.2534	46.3759	24.8964	21.7797	72.6363
1502	ENSG00000002549	LAP3	2594.6	-0.856575	0.396967	-2.1578	0.0309436	0.451257	4544.12	3282.68	6423.26	1527.88	2554.23	1725.91	879.504	2136.05	1892.49	1897.66	1634.46	2637.01
1503	ENSG00000202111	VTRNA1-2	22.4804	1.54041	0.714108	2.15711	0.030997	0.45152	11.0808	28.0467	15.1034	10.1442	4.34948	0.758308	53.9573	52.0652	4.45922	55.3254	20.7897	13.6851
1504	ENSG00000130988	RGN	433.368	1.10116	0.510498	2.15704	0.0310028	0.45152	170.241	497.524	115.433	192.741	319.687	357.921	502.702	672.738	374.575	165.976	1491.91	338.969
1505	ENSG00000198721	ECI2	2112.91	0.684333	0.31737	2.15626	0.0310632	0.452099	1484.82	2555.91	1809.17	947.316	1769.15	1160.97	1339.04	2090.83	3241.85	2879.69	3422.38	2653.86
1506	ENSG00000196562	SULF2	2673.56	1.53142	0.710394	2.15573	0.0311045	0.452399	1680.24	799.94	797.244	877.867	716.576	3373.71	11274.4	4409.1	420.95	6026.78	1238.47	467.399
1507	ENSG00000211716	TRBV9	13.7775	-1.89168	0.877766	-2.15511	0.031153	0.452804	90.6607	8.53595	10.7881	12.4852	2.17474	5.30816	1.79858	8.22083	1.78369	1.84418	5.93991	15.7905
1508	ENSG00000160801	PTH1R	370.968	-1.54523	0.717304	-2.15422	0.0312232	0.452922	18.1321	1051.14	127.3	283.258	449.084	1386.95	174.462	38.3639	262.202	260.952	153.448	246.332
1509	ENSG00000102145	GATA1	4.1909	-3.06044	1.42058	-2.15436	0.0312121	0.452922	28.2055	0	1.07881	7.80326	7.61158	0	1.79858	2.74028	0	0	0	1.0527
1510	ENSG00000223573	TINCR	4.29728	-1.67082	0.775527	-2.15443	0.0312061	0.452922	8.05873	8.53595	4.31526	3.90163	6.52422	8.34139	5.39573	0	2.67553	2.76627	0	1.0527
1511	ENSG00000275056		5.4235	-1.59447	0.740307	-2.15379	0.0312564	0.453104	4.02936	4.87768	5.39407	8.58359	20.66	5.30816	3.59715	2.74028	1.78369	0	4.94992	3.1581
1512	ENSG00000276043	UHRF1	47.8852	-0.858237	0.398543	-2.15344	0.0312845	0.453211	88.646	37.8021	61.4924	49.9409	41.32	91.7553	39.5687	13.7014	54.4025	46.1045	26.7296	23.1594
1513	ENSG00000188257	PLA2G2A	3.34558	4.17282	1.93876	2.15232	0.0313725	0.454048	0	2.43884	0	0	0	0	1.79858	5.48055	0	30.429	0	0
1514	ENSG00000267024		6.53798	1.19002	0.552939	2.15217	0.0313837	0.454048	3.02202	3.65826	4.31526	3.1213	4.34948	5.30816	8.99288	10.9611	9.81028	3.68836	13.8598	7.3689
1515	ENSG00000130997	POLN	9.29826	1.54509	0.7181	2.15163	0.0314265	0.454352	2.01468	8.53595	0	13.2655	2.17474	2.27492	8.09359	15.0715	17.8369	21.2081	15.8397	5.2635
1516	ENSG00000148019	CEP78	118.683	-0.446866	0.207711	-2.15138	0.0314462	0.454352	119.874	128.039	141.325	170.891	140.271	121.329	116.008	91.7992	89.1844	124.482	84.1487	96.8484
1517	ENSG00000103995	CEP152	93.8718	-0.923775	0.429512	-2.15075	0.0314956	0.454766	224.637	76.8235	87.3839	102.223	63.0674	183.511	51.2594	45.2146	94.5355	78.3777	25.7396	93.6903
1518	ENSG00000138449	SLC40A1	2653.05	-0.725634	0.337829	-2.14793	0.031719	0.455888	1990.51	2829.06	6027.33	1786.17	4398.41	2808.77	2728.44	1397.54	1830.06	2293.24	1719.6	2027.5
1519	ENSG00000093217	XYLB	234.554	0.985429	0.458527	2.14912	0.0316252	0.455888	133.976	249.981	83.0687	110.026	232.697	134.979	118.706	417.892	221.177	112.495	521.722	477.926
1520	ENSG00000184216	IRAK1	851.299	0.680303	0.316549	2.14912	0.0316247	0.455888	745.432	675.559	730.357	593.048	730.712	451.193	1237.42	693.29	1418.92	552.332	1648.32	738.995
1521	ENSG00000172935	MRGPRF	16.9784	1.78672	0.83153	2.14871	0.0316571	0.455888	0	2.43884	5.39407	10.9246	9.78632	16.6828	7.1943	71.2472	12.4858	54.4033	7.91987	5.2635
1522	ENSG00000259869		5.85135	2.20801	1.02773	2.14842	0.0316801	0.455888	2.01468	0	2.15763	7.02293	1.08737	0	21.5829	4.11041	0.891844	23.0523	1.97997	6.3162
1523	ENSG00000176894	PXMP2	169.146	1.22342	0.569372	2.14873	0.0316561	0.455888	26.1909	247.542	26.9704	72.5703	128.31	107.68	94.4252	126.053	447.706	284.926	332.635	134.746
1524	ENSG00000101400	SNTA1	685.863	0.655903	0.305344	2.14808	0.0317074	0.455888	348.54	424.359	353.851	598.51	897.08	572.523	975.728	1175.58	707.232	913.791	632.6	630.567
1525	ENSG00000234327	ZNF232-AS1	714.298	1.31428	0.612117	2.1471	0.0317854	0.456543	651.75	130.478	641.894	376.117	250.095	407.97	3667.3	694.66	321.956	348.55	553.401	527.403
1526	ENSG00000122417	ODF2L	324.604	-0.548285	0.25549	-2.14601	0.0318723	0.45659	462.37	337.78	560.983	355.829	259.881	336.689	196.045	228.813	227.42	319.043	285.115	325.284
1527	ENSG00000207205	RNVU1-15	17.6394	-1.52341	0.709971	-2.14573	0.0318945	0.45659	38.279	58.5322	28.0492	18.7278	4.34948	9.0997	1.79858	8.22083	2.67553	13.8314	4.94992	23.1594
1528	ENSG00000205683	DPF3	298.383	1.30298	0.607288	2.14558	0.0319068	0.45659	168.226	308.514	75.517	68.6687	287.065	125.121	715.833	593.27	193.53	328.264	686.059	30.5283
1529	ENSG00000159433	STARD9	161.893	-0.851292	0.396773	-2.14554	0.0319098	0.45659	201.468	109.748	257.837	265.311	110.912	304.082	71.0438	143.864	141.803	199.171	73.2588	64.2147
1530	ENSG00000188322	SBK1	12.3674	-0.987721	0.460371	-2.14549	0.0319138	0.45659	18.1321	21.9496	11.867	21.8491	10.8737	14.4079	7.1943	2.74028	13.3777	6.45463	6.92989	12.6324
1531	ENSG00000101307	SIRPB1	285.115	1.77993	0.829593	2.14554	0.0319096	0.45659	313.283	139.014	198.502	53.0622	33.7084	34.1239	26.9786	1287.93	555.619	666.671	35.6394	76.8471
1532	ENSG00000166823	MESP1	242.841	0.93922	0.437819	2.14522	0.031935	0.456595	282.055	78.0429	171.531	198.203	114.174	154.695	768.891	213.742	206.016	224.068	174.237	328.442
1533	ENSG00000245688		6.40392	2.30775	1.07705	2.14265	0.0321409	0.45924	0	1.21942	2.15763	4.68196	0	4.54985	0.899288	4.11041	0.891844	30.429	24.7496	3.1581
1534	ENSG00000080493	SLC4A4	2195.21	1.01953	0.476234	2.14082	0.0322885	0.460447	293.136	1531.59	1181.3	1773.68	2696.68	1225.43	1848.94	3136.25	3642.29	1416.33	5640.93	1955.92
1535	ENSG00000100504	PYGL	1412.95	0.865576	0.404285	2.141	0.0322739	0.460447	906.607	1310.88	637.579	877.867	1228.73	1046.47	2196.06	2808.78	746.473	2911.04	1652.28	632.673
1536	ENSG00000108813	DLX4	26.0236	1.26158	0.589273	2.1409	0.0322818	0.460447	23.1688	15.8525	12.9458	6.24261	21.7474	12.1329	78.2381	67.1368	22.2961	30.429	16.8297	5.2635
1537	ENSG00000257913	DDN-AS1	22.5292	0.811613	0.379228	2.14017	0.032341	0.460896	10.0734	10.9748	19.4187	23.4098	10.8737	22.7492	30.5758	26.0326	33.8901	40.572	21.7797	20.0013
1538	ENSG00000244607	CCDC13	3.7266	-1.79128	0.837264	-2.13944	0.0323998	0.461298	12.0881	3.65826	2.15763	2.34098	7.61158	6.82477	0	1.37014	2.67553	1.84418	0.989984	3.1581
1539	ENSG00000278095		17.1059	2.49892	1.16818	2.13917	0.0324223	0.461298	0	6.09711	4.31526	18.7278	0	1.51662	104.317	39.734	8.91844	1.84418	19.7997	0
1540	ENSG00000161558	TMEM143	335.808	0.689725	0.322485	2.13878	0.0324535	0.461298	206.505	320.708	234.103	227.855	232.697	320.764	848.029	332.944	348.711	372.524	322.735	262.122
1541	ENSG00000239713	APOBEC3G	1993.36	-0.973922	0.455323	-2.13897	0.0324383	0.461298	4549.15	1203.57	4904.29	1978.13	1596.26	1618.23	994.613	2733.43	1154.94	1349.02	571.221	1267.45
1542	ENSG00000174827	PDZK1	3195.46	0.995391	0.465584	2.13794	0.0325214	0.461964	1455.61	3068.06	1833.98	2109.22	3400.2	942.577	2463.15	2756.72	3933.03	1264.19	7778.31	7340.48
1543	ENSG00000169504	CLIC4	6061.57	0.735099	0.343936	2.13731	0.0325728	0.46209	2783.28	6566.58	2500.69	4777.94	6634.04	4037.23	6402.93	7332.98	12880.9	7098.25	7359.54	4364.49
1544	ENSG00000271897		6.4618	1.46174	0.683979	2.13711	0.0325892	0.46209	2.01468	8.53595	3.23644	4.68196	1.08737	1.51662	9.89217	4.11041	8.91844	17.5197	12.8698	3.1581
1545	ENSG00000272871		14.1004	-0.928746	0.434592	-2.13705	0.0325935	0.46209	16.1175	14.6331	23.7339	15.6065	15.2232	25.0242	4.49644	12.3312	5.35106	11.9872	8.90986	15.7905
1546	ENSG00000210194	MT-TE	75.8334	-1.49888	0.701637	-2.13627	0.0326576	0.462698	47.345	53.6545	130.537	122.511	29.359	288.915	49.4608	2.74028	76.6986	8.29881	25.7396	74.7417
1547	ENSG00000112414	ADGRG6	560.179	-0.817472	0.382906	-2.13492	0.0327679	0.463961	788.748	613.369	796.165	651.572	541.51	897.837	188.85	209.631	867.764	296.913	527.662	342.128
1548	ENSG00000273133		8.1034	1.27245	0.596155	2.13442	0.0328083	0.464234	4.02936	6.09711	3.23644	2.34098	7.61158	5.30816	4.49644	15.0715	24.0798	5.53254	8.90986	10.527
1549	ENSG00000171793	CTPS1	378.257	1.15244	0.540361	2.13272	0.0329475	0.464574	198.446	156.086	251.364	322.275	218.561	261.616	1379.51	137.014	189.071	215.769	916.726	292.651
1550	ENSG00000236810	ELOA-AS1	185.944	0.476506	0.223513	2.13189	0.0330158	0.464574	148.079	189.01	131.615	150.603	180.503	133.462	236.513	241.144	144.479	180.73	242.546	252.648
1551	ENSG00000249806		4.32017	-2.51559	1.17955	-2.13267	0.0329516	0.464574	21.1542	3.65826	9.70933	3.1213	5.43685	0.758308	0	2.74028	0	0	0	5.2635
1552	ENSG00000227214	HCG15	3.3521	2.33215	1.0931	2.13352	0.0328821	0.464574	1.00734	0	0	1.56065	3.26211	0.758308	4.49644	10.9611	11.594	5.53254	0	1.0527
1553	ENSG00000272279		31.1313	2.30037	1.07861	2.13271	0.0329487	0.464574	2.01468	10.9748	5.39407	4.68196	32.6211	7.58308	49.4608	10.9611	163.207	86.6765	0	0
1554	ENSG00000111880	RNGTT	214.662	-0.515208	0.241678	-2.1318	0.0330233	0.464574	250.828	236.568	309.62	276.235	231.61	211.568	175.361	123.312	138.236	266.484	161.367	194.75
1555	ENSG00000218052	ADAMTS7P4	42.2175	-1.14105	0.534894	-2.13322	0.0329064	0.464574	95.6974	23.169	108.96	48.3802	16.3105	56.1148	19.7843	12.3312	28.539	17.5197	19.7997	60.0039
1556	ENSG00000108602	ALDH3A1	71.2618	1.50203	0.704514	2.132	0.0330068	0.464574	9.06607	48.7768	28.0492	4.68196	101.125	31.8489	118.706	147.975	73.1312	212.081	71.2789	8.4216
1557	ENSG00000287443		11.1729	3.10109	1.45441	2.1322	0.0329903	0.464574	3.02202	2.43884	4.31526	0	4.34948	0	3.59715	79.468	0	36.8836	0	0
1558	ENSG00000253598	SLC10A5	26.0918	1.96871	0.923945	2.13076	0.0331089	0.464883	8.05873	9.75537	11.867	14.0459	0	19.716	3.59715	17.8118	8.91844	2.76627	54.4491	162.116
1559	ENSG00000051523	CYBA	6698.94	-0.750789	0.352298	-2.13112	0.0330794	0.464883	11440.4	5232.54	13382.7	5919.55	8457.56	5989.88	4461.37	3626.76	2513.22	5162.78	6221.06	7979.47
1560	ENSG00000215030	RPL13P12	6461.46	-0.859357	0.403275	-2.13094	0.0330939	0.464883	13232.4	8899.33	2890.14	3793.94	10373.5	10796	2720.35	5210.63	3280.2	6795.8	3982.71	5562.47
1561	ENSG00000182749	PAQR7	528.311	0.851266	0.399658	2.12999	0.0331728	0.465481	243.777	534.106	243.812	494.727	307.726	436.785	964.936	665.887	990.839	860.31	216.807	380.025
1562	ENSG00000164300	SERINC5	314.855	-0.479692	0.225278	-2.12934	0.0332265	0.465529	353.577	458.502	311.777	351.147	344.696	382.187	285.974	169.897	304.119	268.328	338.575	209.487
1563	ENSG00000238121	LINC00426	42.9154	-1.35605	0.63689	-2.12917	0.03324	0.465529	110.808	8.53595	122.985	56.9638	42.4074	28.8157	5.39573	9.59097	16.0532	49.7929	25.7396	37.8972
1564	ENSG00000251179	TMEM92-AS1	12.4969	2.52813	1.18721	2.12948	0.0332148	0.465529	14.1028	6.09711	2.15763	0	0	0	71.0438	34.2534	4.45922	14.7534	0.989984	2.1054
1565	ENSG00000132437	DDC	2319.41	1.35079	0.634878	2.12764	0.0333672	0.467013	221.615	2013.26	1322.63	970.725	2657.53	653.662	2741.03	5561.39	1675.78	355.005	7300.14	2360.15
1566	ENSG00000135617	PRADC1	571.191	0.796767	0.374698	2.12642	0.0334679	0.467507	294.144	528.009	567.456	388.602	419.725	307.115	1197.85	401.45	814.254	355.005	1137.49	443.187
1567	ENSG00000185760	KCNQ5	8.92352	-2.12444	0.999543	-2.12541	0.0335525	0.467507	31.2276	2.43884	22.6551	22.6295	0	8.34139	1.79858	0	5.35106	7.37672	0	5.2635
1568	ENSG00000122783	CYREN	1314.35	0.547194	0.257419	2.12569	0.0335289	0.467507	1071.81	1301.12	809.111	1063.58	1050.4	1112.44	2435.27	1515.37	1558.94	914.713	1275.1	1664.32
1569	ENSG00000076716	GPC4	691.022	1.14224	0.537329	2.12578	0.033522	0.467507	501.656	157.305	266.467	607.874	365.356	686.269	2738.33	805.641	585.942	229.6	775.158	572.669
1570	ENSG00000135451	TROAP	103.011	-1.01229	0.476251	-2.12554	0.0335418	0.467507	374.731	99.9925	105.724	81.9342	46.7569	117.538	51.2594	43.8444	56.1862	109.729	66.329	82.1106
1571	ENSG00000274798		6.40706	1.80401	0.84856	2.12597	0.0335059	0.467507	9.06607	2.43884	3.23644	1.56065	1.08737	0	8.09359	5.48055	18.7287	15.6755	0.989984	10.527
1572	ENSG00000069956	MAPK6	347.964	0.7414	0.348868	2.12516	0.0335732	0.467507	245.791	189.01	248.127	238.78	350.133	291.19	893.892	345.275	304.119	376.213	476.182	216.856
1573	ENSG00000232855		18.1117	-1.60949	0.757236	-2.12548	0.0335467	0.467507	47.345	3.65826	67.9653	27.3114	9.78632	7.58308	5.39573	8.22083	0.891844	18.4418	4.94992	15.7905
1574	ENSG00000111319	SCNN1A	159.721	1.67724	0.789427	2.12463	0.0336174	0.467527	131.962	107.309	48.5466	24.9704	89.1643	54.5982	469.428	823.453	27.6472	21.2081	42.5693	75.7944
1575	ENSG00000242247	ARFGAP3	1013.19	0.650314	0.306078	2.12467	0.0336143	0.467527	1055.69	696.289	431.526	817.782	1065.62	665.036	1805.77	1205.72	1140.67	1040.12	1524.58	709.52
1576	ENSG00000109906	ZBTB16	488.991	1.27654	0.600902	2.12437	0.0336394	0.467537	772.631	269.492	81.9899	200.544	226.173	163.795	261.693	753.576	722.394	1426.47	887.026	102.112
1577	ENSG00000153086	ACMSD	1969.58	1.02425	0.482413	2.12318	0.0337386	0.468617	892.504	2777.84	905.125	812.319	1648.45	754.516	671.768	4554.34	2004.87	1824.82	4494.53	2293.83
1578	ENSG00000232530	LIF-AS1	4.04131	3.61861	1.70478	2.12263	0.0337849	0.468964	2.01468	0	0	1.56065	0	0	26.9786	4.11041	0	13.8314	0	0
1579	ENSG00000259577	CERNA1	18.2487	-1.07203	0.505141	-2.12225	0.0338168	0.469108	11.0808	21.9496	47.4678	24.9704	15.2232	27.2991	7.1943	19.1819	20.5124	5.53254	5.93991	12.6324
1580	ENSG00000205542	TMSB4X	221666	-0.884773	0.417149	-2.121	0.033922	0.469316	469755	179855	503875	129079	261514	181427	104022	226769	74146.1	212358	126458	190735
1581	ENSG00000086991	NOX4	419.768	-1.24559	0.58732	-2.1208	0.0339384	0.469316	751.476	1560.86	361.403	489.264	209.862	170.619	464.932	216.482	58.8617	430.616	188.097	134.746
1582	ENSG00000236935		36.9281	-1.62025	0.76398	-2.1208	0.0339389	0.469316	161.175	26.8273	94.9356	14.8262	23.9221	12.1329	8.99288	47.9548	10.7021	17.5197	0.989984	23.1594
1583	ENSG00000287175		3.73966	1.8689	0.880866	2.12167	0.0338657	0.469316	5.0367	1.21942	0	0.780326	1.08737	1.51662	5.39573	5.48055	0.891844	7.37672	11.8798	4.2108
1584	ENSG00000203392		25.1572	-1.45884	0.687799	-2.12102	0.0339199	0.469316	9.06607	76.8235	50.7043	21.0688	14.1358	50.0483	5.39573	6.85069	44.5922	10.143	9.89984	3.1581
1585	ENSG00000163462	TRIM46	32.6908	-1.31164	0.618996	-2.11898	0.0340925	0.469928	120.881	14.6331	62.5712	31.9934	6.52422	43.2236	13.4893	13.7014	37.4575	23.0523	7.91987	16.8432
1586	ENSG00000115112	TFCP2L1	110.179	2.08798	0.985367	2.11899	0.0340917	0.469928	121.888	25.6078	40.9949	4.68196	33.7084	25.0242	812.956	201.41	7.13475	23.9743	7.91987	16.8432
1587	ENSG00000196821	ILRUN	1453.52	0.523304	0.247017	2.11849	0.0341333	0.469928	1416.32	1120.65	1145.7	1327.33	1234.16	913.003	1096.23	1361.92	2409.76	2012.92	1997.79	1406.41
1588	ENSG00000260876	LINC01229	36.2203	-2.1617	1.02023	-2.11884	0.0341037	0.469928	1.00734	6.09711	206.053	129.534	10.8737	1.51662	3.59715	24.6625	31.2145	4.61045	4.94992	10.527
1589	ENSG00000125901	MRPS26	1496.68	0.541383	0.255434	2.11946	0.0340512	0.469928	1215.86	1292.59	1188.85	1051.1	1213.5	1353.58	2723.94	1176.95	1990.6	1105.59	1960.17	1687.48
1590	ENSG00000167617	CDC42EP5	121.876	0.974927	0.460161	2.11867	0.0341187	0.469928	49.3597	164.622	89.5416	63.9867	51.1064	75.0725	109.713	169.897	49.0514	304.29	231.656	104.217
1591	ENSG00000196724	ZNF418	51.0469	-1.21295	0.572267	-2.11955	0.0340443	0.469928	27.1982	15.8525	189.871	105.344	48.9316	40.1903	26.0794	50.6951	14.2695	21.2081	28.7095	44.2134
1592	ENSG00000171853	TRAPPC12	972.702	0.653464	0.308526	2.11802	0.0341735	0.470186	648.728	520.693	595.505	1221.99	776.382	771.958	1454.15	1692.12	1022.05	1415.41	670.219	883.215
1593	ENSG00000155008	APOOL	427.834	0.667665	0.315395	2.11692	0.0342667	0.471173	347.533	204.863	308.541	497.848	392.54	232.042	840.834	389.119	663.532	369.758	415.793	471.61
1594	ENSG00000253925		51.0057	5.09603	2.40777	2.1165	0.0343027	0.471371	13.0954	0	4.31526	0	0	0	330.039	258.956	0	4.61045	0	1.0527
1595	ENSG00000196154	S100A4	10812.6	-0.78282	0.369956	-2.11598	0.0343464	0.471375	16304.8	11439.4	23073.7	10530.5	13052.8	7655.88	3438.88	7859.11	6484.6	8836.39	6697.24	14377.8
1596	ENSG00000249852		9.48483	2.42073	1.14406	2.11591	0.0343522	0.471375	0	0	6.47288	0.780326	10.8737	0	12.59	20.5521	0.891844	52.5591	5.93991	3.1581
1597	ENSG00000151892	GFRA1	963.615	2.54258	1.20175	2.11573	0.0343675	0.471375	420.061	7.31653	569.614	42.1376	51.1064	603.613	649.286	1442.76	1748.91	5965.92	7.91987	54.7404
1598	ENSG00000186509	OR9Q1	54.5393	3.62775	1.71584	2.11427	0.0344923	0.472791	1.00734	39.0215	0	1.56065	7.61158	0	0	516.542	24.9716	53.4812	3.95994	6.3162
1599	ENSG00000122224	LY9	115.792	-1.06505	0.503934	-2.11347	0.0345603	0.472864	196.431	80.4818	331.196	68.6687	196.814	66.7311	25.1801	60.2861	55.2943	105.118	64.349	138.956
1600	ENSG00000196189	SEMA4A	369.161	-1.00036	0.47325	-2.11381	0.0345318	0.472864	830.049	248.762	614.924	720.241	367.531	172.136	167.268	178.118	385.277	225.912	88.1086	431.607
1601	ENSG00000277075	H2AC8	721.212	-1.54893	0.732893	-2.11345	0.0345624	0.472864	1460.64	1537.69	83.0687	2192.72	617.626	558.115	47.6623	368.567	36.5656	437.993	463.313	850.582
1602	ENSG00000160856	FCRL3	63.1531	-1.8292	0.865996	-2.11225	0.0346651	0.473973	370.701	54.8739	18.3398	23.4098	89.1643	34.8822	0.899288	19.1819	16.0532	44.2603	3.95994	82.1106
1603	ENSG00000277229		10.9878	1.16327	0.550838	2.11182	0.0347018	0.474179	6.04405	4.87768	8.63051	7.02293	9.78632	4.54985	17.0865	13.7014	31.2145	3.68836	16.8297	8.4216
1604	ENSG00000111404	RERGL	73.76	1.5955	0.755664	2.11139	0.0347386	0.474386	13.0954	6.09711	15.1034	19.5081	77.2032	88.722	6.29502	45.2146	92.7518	78.3777	156.418	286.334
1605	ENSG00000154380	ENAH	439.342	0.543763	0.257679	2.11023	0.0348385	0.474605	234.71	324.366	360.324	519.697	390.366	315.456	649.286	463.107	481.596	589.216	602.9	341.075
1606	ENSG00000146192	FGD2	231.903	-0.91354	0.432917	-2.1102	0.0348413	0.474605	622.537	114.626	329.038	359.73	230.522	161.52	87.2309	135.644	223.853	262.796	123.748	131.588
1607	ENSG00000112494	UNC93A	16.0297	6.34211	3.00448	2.11088	0.0347824	0.474605	0	2.43884	0	0	0	0	89.9288	0	0	0	99.9884	0
1608	ENSG00000182010	RTKN2	34.8898	-1.07282	0.508394	-2.11022	0.0348396	0.474605	90.6607	49.9963	43.1526	34.3343	31.5337	34.1239	5.39573	21.9222	16.945	47.0266	9.89984	33.6864
1609	ENSG00000105982	RNF32	118.403	0.899427	0.42631	2.1098	0.034876	0.474722	47.345	59.7516	91.6992	114.708	86.9895	94.7885	179.858	146.605	82.9415	48.8708	151.468	315.81
1610	ENSG00000196557	CACNA1H	229.872	1.53437	0.727329	2.10959	0.0348933	0.474722	38.279	224.373	162.901	23.4098	183.765	75.8308	1095.33	180.858	54.4025	531.124	70.2889	117.902
1611	ENSG00000019186	CYP24A1	83.9796	5.93005	2.81158	2.10915	0.0349313	0.474945	0	0	0	0	16.3105	0	0	648.075	236.339	106.04	0.989984	0
1612	ENSG00000047597	XK	20.7961	2.46665	1.16969	2.1088	0.0349615	0.47506	24.1762	4.87768	0	3.1213	0	6.06646	165.469	15.0715	1.78369	23.9743	3.95994	1.0527
1613	ENSG00000213904	LIPE-AS1	1067.48	1.16178	0.55107	2.10822	0.0350121	0.475453	559.074	273.15	628.949	713.218	1034.09	748.45	4829.18	663.147	1228.07	505.305	571.221	1055.86
1614	ENSG00000182973	CNOT10	275.312	-0.478932	0.227298	-2.10707	0.0351116	0.475795	431.142	292.661	330.117	338.661	235.959	294.982	199.642	230.183	246.149	303.368	169.287	231.594
1615	ENSG00000183580	FBXL7	152.334	1.13751	0.540101	2.1061	0.0351958	0.475795	56.4111	113.406	88.4628	86.6162	132.659	94.0302	182.555	65.7666	58.8617	307.978	562.311	78.9525
1616	ENSG00000220377	GSTA8P	7.23964	6.33765	3.00724	2.10746	0.0350775	0.475795	0	0	0	0	0	0	0	0	56.1862	0	30.6895	0
1617	ENSG00000228401		49.8961	-0.898412	0.426611	-2.10593	0.0352107	0.475795	35.2569	93.8954	60.4136	35.1147	116.349	48.5317	22.4822	56.1757	27.6472	52.5591	19.7997	30.5283
1618	ENSG00000254838	GVINP1	254.269	-0.995688	0.472876	-2.1056	0.035239	0.475795	591.309	236.568	575.008	179.475	284.891	164.553	55.7559	223.332	108.805	193.639	116.818	321.074
1619	ENSG00000029153	ARNTL2	68.9951	-0.819462	0.389261	-2.10517	0.0352762	0.475795	141.028	32.9244	111.118	71.0097	59.8053	112.23	47.6623	43.8444	32.9982	52.5591	39.5994	83.1633
1620	ENSG00000121281	ADCY7	346.587	-0.785194	0.372944	-2.1054	0.0352567	0.475795	673.911	229.251	627.87	493.946	400.152	207.018	169.066	231.553	348.711	379.901	170.277	227.383
1621	ENSG00000220161	LINC02076	17.3668	1.28893	0.611979	2.10617	0.0351893	0.475795	19.1395	7.31653	5.39407	3.90163	5.43685	18.9577	24.2808	41.1041	18.7287	43.3382	3.95994	16.8432
1622	ENSG00000259207	ITGB3	283.875	0.985809	0.468127	2.10586	0.0352168	0.475795	300.188	108.528	234.103	170.891	167.455	161.52	605.221	668.627	246.149	496.085	110.878	136.851
1623	ENSG00000105122	RASAL3	370.714	-0.793104	0.376451	-2.10679	0.0351354	0.475795	521.803	264.614	654.84	692.929	390.366	296.498	165.469	189.079	313.037	521.903	181.167	256.859
1624	ENSG00000130816	DNMT1	448.554	-0.550374	0.26125	-2.10669	0.0351443	0.475795	716.219	351.193	671.022	403.429	476.268	580.864	312.053	265.807	324.631	451.824	468.263	361.076
1625	ENSG00000233929	MT1XP1	10.1318	1.53836	0.730911	2.10471	0.0353164	0.476044	9.06607	9.75537	5.39407	0.780326	3.26211	3.03323	4.49644	43.8444	17.8369	12.9093	5.93991	5.2635
1626	ENSG00000143369	ECM1	325.417	1.05459	0.501459	2.10305	0.0354618	0.477122	179.307	109.748	224.393	274.675	265.318	215.359	296.765	465.847	163.207	1274.33	162.357	273.702
1627	ENSG00000114251	WNT5A	42.8288	0.943493	0.44853	2.10352	0.0354202	0.477122	20.1468	15.8525	32.3644	30.4327	36.9706	39.432	39.5687	97.2798	55.2943	93.1311	36.6294	16.8432
1628	ENSG00000211792	TRAV14DV4	41.1088	-1.8082	0.85979	-2.10307	0.0354596	0.477122	40.2936	52.4351	238.418	47.5999	3.26211	1.51662	5.39573	34.2534	27.6472	6.45463	12.8698	23.1594
1629	ENSG00000198624	CCDC69	359.965	-0.549863	0.261653	-2.1015	0.0355975	0.477545	483.524	319.488	656.998	396.406	468.656	241.9	320.147	293.21	294.309	284.926	249.476	310.547
1630	ENSG00000164266	SPINK1	150.48	2.89438	1.37733	2.10144	0.0356022	0.477545	145.057	34.1438	4.31526	0.780326	26.0969	3.79154	36.8708	360.346	14.2695	1171.98	4.94992	3.1581
1631	ENSG00000287407		74.1942	4.35311	2.07101	2.10192	0.0355599	0.477545	14.1028	0	0	0	0	27.2991	266.189	87.6888	0	484.097	9.89984	1.0527
1632	ENSG00000226816		9.69749	-1.52345	0.724919	-2.10154	0.0355936	0.477545	25.1835	18.2913	18.3398	1.56065	11.9611	10.6163	4.49644	10.9611	0	2.76627	6.92989	5.2635
1633	ENSG00000100055	CYTH4	422.681	-0.937124	0.44582	-2.10202	0.0355515	0.477545	737.374	220.715	1010.85	564.176	517.588	281.332	105.217	293.21	348.711	505.305	178.197	309.494
1634	ENSG00000168078	PBK	55.925	-0.739251	0.351888	-2.10081	0.0356574	0.477701	120.881	51.2157	70.1229	63.2064	61.98	52.3233	23.3815	35.6236	33.8901	61.78	35.6394	61.0566
1635	ENSG00000172824	CES4A	759.301	1.38484	0.659158	2.10093	0.0356475	0.477701	310.261	780.429	731.436	300.425	279.454	121.329	1259.9	2407.33	271.121	2199.19	163.347	287.387
1636	ENSG00000168994	PXDC1	1671.13	0.669147	0.318608	2.10022	0.0357095	0.478105	1148.37	1547.45	868.445	1207.16	1454.9	1516.62	2598.94	1118.03	2230.5	2477.66	2875.9	1009.54
1637	ENSG00000012174	MBTPS2	290.091	0.455789	0.217162	2.09884	0.0358308	0.479144	233.703	341.438	198.502	200.544	264.231	229.767	309.355	434.334	307.686	291.38	372.234	297.914
1638	ENSG00000258560		6.2677	-2.1035	1.00215	-2.099	0.035817	0.479144	29.2129	8.53595	16.1822	2.34098	3.26211	1.51662	0	1.37014	0	2.76627	7.91987	2.1054
1639	ENSG00000273796		195.864	0.745001	0.355083	2.09811	0.0358958	0.47972	181.321	198.766	134.852	74.9113	165.28	123.604	382.197	365.827	154.289	142.002	250.466	176.854
1640	ENSG00000162817	C1orf115	1197.7	0.777255	0.3709	2.09559	0.0361183	0.480641	480.502	1071.87	458.496	905.178	1784.37	596.03	1214.04	1600.32	2141.32	1424.63	1034.53	1661.16
1641	ENSG00000169607	CKAP2L	49.0646	-1.17331	0.559751	-2.09612	0.0360717	0.480641	129.947	12.1942	66.8865	80.3736	69.5916	49.29	26.0794	13.7014	30.3227	77.4556	11.8798	21.054
1642	ENSG00000065413	ANKRD44	286.87	-0.839627	0.400477	-2.09657	0.0360318	0.480641	708.161	131.697	439.077	410.451	314.25	204.743	160.973	216.482	312.145	218.535	122.758	203.171
1643	ENSG00000107282	APBA1	44.1349	0.717179	0.34218	2.09591	0.0360901	0.480641	23.1688	42.6797	25.8915	33.554	39.1453	36.3988	66.5473	39.734	46.3759	94.0532	50.4892	31.581
1644	ENSG00000133328	PLAAT2	148.563	1.54108	0.735376	2.09563	0.036115	0.480641	19.1395	171.938	106.803	17.1672	105.475	35.6405	53.058	835.784	184.612	71.923	113.848	67.3728
1645	ENSG00000257809	MYL6B-AS1	13.0902	1.41094	0.673154	2.09601	0.036081	0.480641	8.05873	13.4136	7.5517	5.46228	0	8.34139	11.6907	42.4743	10.7021	28.5848	3.95994	16.8432
1646	ENSG00000070495	JMJD6	640.721	0.525501	0.250611	2.09688	0.0360041	0.480641	543.964	578.006	418.58	441.664	494.753	674.894	477.522	620.672	818.713	839.102	1102.84	677.939
1647	ENSG00000271913	TAGAP-AS1	112.413	-0.759928	0.362716	-2.0951	0.0361618	0.480657	177.292	189.01	169.374	89.7375	122.873	100.855	39.5687	42.4743	109.697	94.9753	125.728	87.3741
1648	ENSG00000101336	HCK	359.346	-0.895048	0.427264	-2.09484	0.0361853	0.480657	822.998	182.913	761.643	344.904	465.394	226.734	137.591	186.339	316.605	345.784	180.177	341.075
1649	ENSG00000087076	HSD17B14	2734.49	0.758754	0.362174	2.095	0.0361708	0.480657	560.082	2915.64	2401.44	2291.82	2117.11	1903.35	2394.8	4072.05	3111.64	3544.51	4869.73	2631.75
1650	ENSG00000204991	SPIRE2	95.7747	-1.03273	0.493287	-2.09357	0.036298	0.481861	118.866	171.938	97.0933	127.193	23.9221	232.801	85.4324	68.5069	28.539	112.495	43.5593	38.9499
1651	ENSG00000137496	IL18BP	745.762	-0.808808	0.38641	-2.09313	0.0363372	0.48209	1671.18	620.685	1465.03	550.13	811.177	578.589	482.018	672.738	267.553	707.243	389.064	733.732
1652	ENSG00000171067	C11orf24	609.852	0.505761	0.241688	2.09262	0.0363831	0.482407	527.847	534.106	554.51	405.769	470.831	531.574	850.726	726.173	750.933	516.37	999.884	449.503
1653	ENSG00000137941	TTLL7	111.68	-1.01361	0.484518	-2.092	0.0364389	0.482854	106.778	95.1148	192.029	166.99	145.707	189.577	17.0865	75.3576	144.479	111.573	21.7797	73.689
1654	ENSG00000136859	ANGPTL2	783.202	0.632624	0.302438	2.09175	0.0364613	0.482858	528.854	764.577	457.417	823.244	544.772	566.456	1401.09	745.355	591.293	1129.56	1256.29	589.512
1655	ENSG00000131013	PPIL4	396.623	-0.536891	0.25671	-2.09143	0.0364898	0.482944	477.48	596.297	577.166	341.002	492.578	332.897	246.405	445.295	275.58	396.499	260.366	317.915
1656	ENSG00000125798	FOXA2	6.98207	6.28459	3.00739	2.08971	0.0366436	0.484687	0	0	0	0	0	0	0.899288	0	0	0	37.6194	45.2661
1657	ENSG00000056736	IL17RB	383.772	1.48927	0.712797	2.08933	0.0366782	0.484834	124.91	142.672	103.566	255.947	237.047	345.03	45.8637	494.62	494.082	30.429	1721.58	609.513
1658	ENSG00000161640	SIGLEC11	11.4134	-2.09736	1.00396	-2.0891	0.036699	0.484834	59.4331	1.21942	11.867	28.8721	2.17474	7.58308	0	1.37014	1.78369	17.5197	1.97997	3.1581
1659	ENSG00000168394	TAP1	3942.64	-0.792457	0.37945	-2.08844	0.0367585	0.485036	6948.64	3719.23	6218.28	5577.77	4486.49	3044.61	1319.26	1218.05	4727.67	3628.42	2978.86	3444.43
1660	ENSG00000266921	ZNF230-DT	42.217	0.926281	0.443487	2.08863	0.0367408	0.485036	33.2423	21.9496	51.7831	17.9475	22.8348	27.2991	125.9	42.4743	24.0798	43.3382	50.4892	45.2661
1661	ENSG00000225981	MICALL2-DT	9.26483	1.58688	0.760635	2.08626	0.0369547	0.486745	0	1.21942	4.31526	5.46228	13.0484	3.79154	4.49644	5.48055	31.2145	10.143	9.89984	22.1067
1662	ENSG00000131626	PPFIA1	552.789	0.33609	0.161095	2.08628	0.0369531	0.486745	491.582	471.916	436.92	508.773	558.908	463.326	526.983	705.621	687.612	537.579	665.269	578.985
1663	ENSG00000261416	CORO1A-AS1	10.3865	-1.67531	0.802956	-2.08643	0.0369399	0.486745	8.05873	6.09711	30.2068	18.7278	27.1842	4.54985	0	5.48055	0.891844	11.9872	1.97997	9.4743
1664	ENSG00000162461	SLC25A34	191.312	1.12858	0.541775	2.08312	0.0372404	0.487884	33.2423	197.546	75.517	100.662	225.085	88.722	222.124	375.418	120.399	188.106	591.021	77.8998
1665	ENSG00000076003	MCM6	456.406	-0.535036	0.256743	-2.08393	0.0371661	0.487884	782.704	364.607	459.575	542.327	409.938	680.961	498.206	337.054	303.227	370.68	395.994	331.601
1666	ENSG00000109819	PPARGC1A	299.783	1.23857	0.594073	2.08489	0.0370796	0.487884	27.1982	347.535	110.039	170.111	177.241	238.867	166.368	164.417	312.145	334.719	1259.26	289.493
1667	ENSG00000138709	LARP1B	351.216	0.790295	0.379079	2.08477	0.0370898	0.487884	171.248	340.218	173.689	370.655	229.435	258.583	569.249	519.282	404.897	181.652	750.408	245.279
1668	ENSG00000184357	H1-5	67.4715	-1.27523	0.612088	-2.08341	0.0372135	0.487884	207.512	30.4855	137.009	92.0785	46.7569	59.148	17.9858	36.9937	14.2695	119.872	13.8598	33.6864
1669	ENSG00000235645	LINC02651	9.4211	1.50661	0.722946	2.08398	0.0371617	0.487884	8.05873	4.87768	10.7881	3.1213	2.17474	0.758308	21.5829	6.85069	11.594	4.61045	4.94992	33.6864
1670	ENSG00000174600	CMKLR1	258.931	-0.799949	0.383891	-2.08379	0.0371792	0.487884	401.929	212.179	538.328	168.55	428.423	225.217	215.829	102.76	182.828	331.952	129.688	169.485
1671	ENSG00000208892	SNORA49	4.80037	1.75209	0.841091	2.08311	0.0372409	0.487884	1.00734	4.87768	0	3.90163	1.08737	2.27492	16.1872	9.59097	8.91844	2.76627	5.93991	1.0527
1672	ENSG00000242259	C22orf39	376.496	0.555078	0.266467	2.0831	0.0372417	0.487884	310.261	182.913	303.147	358.95	335.997	338.205	667.272	327.463	486.055	358.693	506.872	342.128
1673	ENSG00000162645	GBP2	2679.24	-0.968368	0.465091	-2.0821	0.0373331	0.488396	6726.02	1725.48	3894.52	4800.57	3096.83	1032.82	1543.18	2452.55	835.658	2246.21	964.245	2832.82
1674	ENSG00000184719	RNLS	992.935	1.11338	0.534777	2.08194	0.0373477	0.488396	816.954	841.401	947.199	316.032	524.112	321.523	470.328	905.661	3587.89	1961.29	421.733	801.105
1675	ENSG00000103534	TMC5	29.0216	2.60496	1.25109	2.08214	0.0373293	0.488396	18.1321	26.8273	2.15763	0	0	2.27492	37.7701	158.936	0	94.0532	4.94992	3.1581
1676	ENSG00000146122	DAAM2	318.94	1.34333	0.645509	2.08104	0.0374298	0.489178	127.932	49.9963	140.246	202.885	400.152	160.761	320.147	321.982	107.021	1633.02	133.648	229.489
1677	ENSG00000184307	ZDHHC23	80.9651	1.10067	0.529118	2.08019	0.0375078	0.489905	36.2643	49.9963	26.9704	76.4719	47.8442	71.281	197.843	23.2923	125.75	29.5069	198.987	87.3741
1678	ENSG00000162510	MATN1	5.36375	2.25196	1.08301	2.07935	0.0375848	0.490132	4.02936	2.43884	1.07881	0	2.17474	1.51662	11.6907	26.0326	8.0266	7.37672	0	0
1679	ENSG00000131781	FMO5	103.778	1.09863	0.528696	2.078	0.0377095	0.490132	83.6093	41.4603	33.4432	116.269	44.5821	76.5891	184.354	64.3965	199.773	59.0138	37.6194	304.23
1680	ENSG00000117411	B4GALT2	587.07	0.70448	0.338953	2.0784	0.0376724	0.490132	297.166	357.29	338.748	919.224	305.551	460.293	762.596	505.581	982.812	879.674	647.45	588.459
1681	ENSG00000119866	BCL11A	55.6255	-1.36553	0.657164	-2.07792	0.0377171	0.490132	28.2055	208.521	15.1034	63.2064	118.523	47.7734	33.2737	8.22083	43.7004	18.4418	9.89984	72.6363
1682	ENSG00000272970		23.1302	1.19488	0.575065	2.07781	0.0377266	0.490132	13.0954	20.7302	5.39407	5.46228	22.8348	17.4411	44.9644	4.11041	50.8351	48.8708	22.7696	21.054
1683	ENSG00000248275	TRIM52-AS1	649.944	0.634622	0.305275	2.07885	0.037631	0.490132	636.639	581.664	612.766	332.419	500.19	392.804	1299.47	706.991	709.908	402.953	760.308	863.214
1684	ENSG00000120899	PTK2B	617.855	-0.664927	0.319832	-2.07899	0.0376184	0.490132	809.902	402.409	1287.03	870.844	745.935	430.719	393.888	452.146	627.858	525.591	357.384	510.56
1685	ENSG00000259003		3.77646	-3.04341	1.46409	-2.07871	0.0376438	0.490132	6.04405	8.53595	20.4975	0	5.43685	0	2.69786	0	0	0	0	2.1054
1686	ENSG00000171695	LKAAEAR1	11.2057	1.51177	0.727126	2.0791	0.0376078	0.490132	6.04405	3.65826	9.70933	3.90163	6.52422	5.30816	47.6623	6.85069	5.35106	31.3511	4.94992	3.1581
1687	ENSG00000236008	LINC01814	94.3943	1.65771	0.798042	2.07722	0.037781	0.490258	35.2569	73.1653	94.9356	24.9704	18.4853	25.7825	154.678	563.127	42.8085	23.0523	5.93991	70.5309
1688	ENSG00000124588	NQO2	2469.71	0.887798	0.427351	2.07744	0.0377605	0.490258	774.645	3081.48	1452.08	1483.4	1758.28	1848	2452.36	3299.29	4307.61	923.012	5682.51	2573.85
1689	ENSG00000275880		8.90895	1.84511	0.888469	2.07673	0.0378267	0.49027	2.01468	0	1.07881	4.68196	7.61158	7.58308	6.29502	9.59097	2.67553	4.61045	54.4491	6.3162
1690	ENSG00000181896	ZNF101	184.206	-0.677865	0.326383	-2.0769	0.0378106	0.49027	253.85	128.039	380.821	266.091	183.765	147.87	173.563	126.053	123.074	183.496	89.0986	154.747
1691	ENSG00000164344	KLKB1	181.675	1.19928	0.577639	2.07618	0.0378775	0.490638	18.1321	158.525	145.64	194.301	95.6885	49.29	123.202	246.625	542.241	305.212	246.506	54.7404
1692	ENSG00000172795	DCP2	638.996	-0.627842	0.302586	-2.07492	0.0379939	0.491855	1261.19	519.473	769.194	850.555	591.529	663.52	660.077	467.217	609.129	535.734	261.356	478.979
1693	ENSG00000133574	GIMAP4	1844.78	-0.821974	0.396274	-2.07426	0.0380555	0.492071	3110.67	1597.44	4220.32	1718.28	2467.24	1025.23	791.373	1670.2	677.801	2073.78	1384.99	1400.09
1694	ENSG00000189233	NUGGC	45.4832	-1.57028	0.757008	-2.07433	0.0380489	0.492071	96.7047	158.525	78.7534	62.4261	7.61158	4.54985	25.1801	6.85069	25.8635	5.53254	14.8498	58.9512
1695	ENSG00000277597		24.7546	1.02418	0.49382	2.074	0.0380795	0.49209	15.1101	18.2913	19.4187	21.0688	9.78632	14.4079	72.8423	19.1819	41.0248	10.143	16.8297	38.9499
1696	ENSG00000225313		8.37352	2.11597	1.02071	2.07305	0.0381681	0.492944	0	0	1.07881	3.1213	7.61158	6.82477	7.1943	12.3312	1.78369	53.4812	4.94992	2.1054
1697	ENSG00000167550	RHEBL1	68.477	-1.01488	0.489784	-2.0721	0.0382563	0.493793	138.006	54.8739	121.906	44.4786	75.0285	114.505	11.6907	89.059	33.8901	55.3254	19.7997	63.162
1698	ENSG00000188404	SELL	151.171	-0.976411	0.471749	-2.06977	0.0384738	0.49427	492.59	48.7768	178.004	157.626	215.299	110.713	71.0438	73.9874	151.613	116.183	78.2088	120.008
1699	ENSG00000123684	LPGAT1	918.517	0.404254	0.195307	2.06984	0.0384672	0.49427	930.783	660.926	727.121	1020.67	760.071	643.804	942.454	1068.71	1179.02	1021.68	1204.81	862.161
1700	ENSG00000225024	RPL37P11	37.6381	2.07145	1.00012	2.07121	0.0383389	0.49427	0	15.8525	25.8915	4.68196	28.2716	12.1329	11.6907	232.923	0.891844	24.8964	88.1086	6.3162
1701	ENSG00000128039	SRD5A3	60.2205	0.701431	0.338828	2.07017	0.0384364	0.49427	36.2643	25.6078	40.9949	79.5932	47.8442	43.9819	106.116	80.8381	57.9699	93.1311	53.4592	56.8458
1702	ENSG00000178462	TUBAL3	9.15734	3.43777	1.66038	2.07047	0.0384081	0.49427	4.02936	2.43884	2.15763	0	0	0.758308	85.4324	15.0715	0	0	0	0
1703	ENSG00000233871	DLG5-AS1	15.9864	1.0863	0.524628	2.07061	0.0383956	0.49427	6.04405	3.65826	10.7881	14.0459	21.7474	5.30816	43.1658	12.3312	14.2695	17.5197	19.7997	23.1594
1704	ENSG00000133636	NTS	139.085	-1.89983	0.917618	-2.07039	0.0384158	0.49427	491.582	20.7302	432.604	50.7212	150.057	170.619	5.39573	5.48055	73.1312	5.53254	16.8297	246.332
1705	ENSG00000118898	PPL	334.07	1.38131	0.667002	2.07093	0.0383658	0.49427	36.2643	465.819	185.556	80.3736	157.669	186.544	415.471	1271.49	94.5355	727.529	296.005	91.5849
1706	ENSG00000132881	CPLANE2	77.3309	0.81256	0.392708	2.06912	0.0385349	0.494475	22.1615	98.7731	52.8619	67.108	57.6306	38.6737	83.6338	90.4291	88.2926	134.625	48.5092	145.273
1707	ENSG00000068615	REEP1	24.6842	1.5036	0.726634	2.06927	0.038521	0.494475	5.0367	14.6331	1.07881	19.5081	10.8737	25.7825	13.4893	16.4417	8.0266	119.872	26.7296	34.7391
1708	ENSG00000109680	TBC1D19	224.272	0.676384	0.327202	2.06718	0.0387175	0.495129	145.057	218.276	117.591	188.059	147.882	218.393	140.289	298.69	249.716	172.431	430.643	364.234
1709	ENSG00000083857	FAT1	2002.89	0.741089	0.358407	2.06773	0.0386654	0.495129	1170.53	1648.66	1155.41	992.575	1162.4	2866.4	2378.62	3900.78	1988.81	3463.37	1952.25	1354.82
1710	ENSG00000112530	PACRG	93.947	-1.36761	0.661723	-2.06675	0.0387581	0.495129	74.5432	157.305	190.95	99.8817	75.0285	214.601	51.2594	63.0263	27.6472	78.3777	0	94.743
1711	ENSG00000102221	JADE3	96.5983	0.58505	0.282885	2.06816	0.0386253	0.495129	64.4698	96.3343	46.389	104.564	77.2032	74.3142	168.167	130.163	95.4273	86.6765	104.938	110.534
1712	ENSG00000148483	TMEM236	6.45828	1.8138	0.877648	2.06665	0.0387667	0.495129	5.0367	2.43884	4.31526	4.68196	0	0.758308	19.7843	5.48055	8.91844	23.0523	1.97997	1.0527
1713	ENSG00000111775	COX6A1	3460.73	0.944921	0.456976	2.06777	0.0386617	0.495129	1465.68	3027.82	1508.18	2777.96	2706.46	2711.71	11447.9	2011.36	4040.05	4247.15	4140.11	1444.3
1714	ENSG00000128011	LRFN1	80.5253	1.4823	0.717131	2.06699	0.0387354	0.495129	69.5065	14.6331	43.1526	54.6228	40.2327	32.6072	476.623	21.9222	43.7004	114.339	29.6995	25.2648
1715	ENSG00000169136	ATF5	984.408	0.882846	0.427054	2.06729	0.0387064	0.495129	1050.66	520.693	501.649	920.785	540.423	619.538	3008.12	579.568	1181.69	1181.2	1179.07	529.508
1716	ENSG00000272236		9.54367	-1.34127	0.649345	-2.06558	0.0388686	0.496141	23.1688	7.31653	18.3398	18.7278	3.26211	11.3746	3.59715	2.74028	7.13475	1.84418	13.8598	3.1581
1717	ENSG00000002330	BAD	2232.44	0.418908	0.202861	2.06501	0.0389225	0.496539	1615.77	1754.75	1717.47	2463.49	1881.15	2029.99	2777	2621.07	3397.93	2035.98	2116.59	2378.05
1718	ENSG00000157625	TAB3	268.696	0.588328	0.285104	2.06356	0.0390595	0.497173	234.71	212.179	196.344	230.196	241.396	173.653	553.961	241.144	282.715	190.873	286.105	381.077
1719	ENSG00000257322		38.445	1.66257	0.80564	2.06366	0.0390498	0.497173	21.1542	54.8739	9.70933	0.780326	19.5726	5.30816	71.0438	15.0715	17.8369	8.29881	119.788	117.902
1720	ENSG00000140678	ITGAX	454.606	-0.773831	0.375047	-2.06329	0.0390852	0.497173	822.998	295.1	749.776	560.274	642.635	371.571	337.233	247.995	444.138	121.716	403.914	457.925
1721	ENSG00000167676	PLIN4	31.8444	1.89877	0.919985	2.06391	0.0390258	0.497173	4.02936	3.65826	9.70933	0.780326	13.0484	49.29	165.469	6.85069	51.727	50.715	24.7496	2.1054
1722	ENSG00000213923	CSNK1E	1133.68	0.769112	0.372761	2.06328	0.0390856	0.497173	570.155	602.394	390.531	1032.37	1313.54	1121.54	1756.31	961.837	1652.59	2164.15	1285	753.733
1723	ENSG00000174502	SLC26A9	316.752	2.55168	1.23766	2.0617	0.0392361	0.498697	3.02202	65.8487	45.3102	89.7375	327.298	22.7492	0	69.877	1094.29	182.574	1392.91	507.401
1724	ENSG00000277224	H2BC7	106.744	-1.95345	0.947566	-2.06155	0.039251	0.498697	770.616	19.5107	22.6551	128.754	38.0579	38.6737	8.09359	6.85069	106.129	54.4033	2.96995	84.216
1725	ENSG00000167912	TOX-DT	56.0184	-1.21625	0.590155	-2.0609	0.0393123	0.499186	123.903	21.9496	201.738	48.3802	43.4948	30.3323	19.7843	50.6951	47.2677	37.8057	7.91987	38.9499
1726	ENSG00000253490	LINC02099	4.64138	-2.5702	1.24755	-2.0602	0.0393794	0.499749	29.2129	0	7.5517	5.46228	5.43685	0	0	1.37014	3.56738	0	0.989984	2.1054
1727	ENSG00000260317	LINC02986	41.0977	0.894782	0.434582	2.05895	0.0394991	0.500398	38.279	28.0467	31.2856	24.9704	25.0095	25.0242	58.4537	68.5069	54.4025	100.508	20.7897	17.8959
1728	ENSG00000078124	ACER3	258.659	-0.526263	0.255581	-2.05909	0.039486	0.500398	359.621	268.273	303.147	229.416	351.22	320.006	265.29	254.846	139.128	229.6	246.506	136.851
1729	ENSG00000197586	ENTPD6	841.049	0.613945	0.298116	2.05942	0.039454	0.500398	648.728	491.427	598.742	819.342	580.655	848.547	1672.68	1292.04	861.521	983.87	661.31	633.725
1730	ENSG00000143167	GPA33	5.83306	-1.4665	0.712904	-2.05707	0.0396792	0.500925	7.05139	3.65826	18.3398	7.80326	8.69895	6.06646	5.39573	1.37014	3.56738	0	5.93991	2.1054
1731	ENSG00000000971	CFH	802.387	1.48623	0.722228	2.05784	0.0396058	0.500925	883.438	158.525	662.392	220.832	324.036	283.607	1031.48	1911.34	56.1862	3273.42	180.177	643.2
1732	ENSG00000158825	CDA	1588.5	1.79948	0.874628	2.05742	0.0396458	0.500925	331.415	1359.65	995.745	232.537	1025.39	309.39	2817.47	10840.5	162.316	464.733	338.575	184.223
1733	ENSG00000196372	ASB13	1420.14	0.791457	0.384791	2.05685	0.0397008	0.500925	1575.48	1107.23	809.111	744.431	1108.03	896.32	595.329	2421.03	2711.21	1875.53	2278.94	919.007
1734	ENSG00000166268	MYRFL	59.0254	1.77557	0.863017	2.0574	0.039648	0.500925	0	43.8992	26.9704	33.554	36.9706	18.9577	76.4395	5.48055	270.229	9.2209	145.528	41.0553
1735	ENSG00000156265	MAP3K7CL	872.748	1.19376	0.580294	2.05716	0.0396709	0.500925	693.051	410.945	886.785	383.14	324.036	487.592	1005.4	2512.83	328.199	2562.49	157.408	721.1
1736	ENSG00000182871	COL18A1	5948.31	1.0426	0.506839	2.05706	0.0396809	0.500925	3053.25	2114.48	2740.19	6960.51	4434.29	4024.34	20876.1	3074.59	3629.81	11813.8	4105.47	4552.93
1737	ENSG00000144554	FANCD2	57.2149	-0.713644	0.347043	-2.05636	0.0397482	0.500982	117.859	63.4099	50.7043	55.4031	39.1453	99.3384	31.4751	50.6951	31.2145	50.715	53.4592	43.1607
1738	ENSG00000130707	ASS1	3312.43	1.10006	0.534963	2.05633	0.039751	0.500982	1500.94	2273	3608.63	1188.44	2263.9	1809.32	3348.05	10659.7	898.979	3840.51	7073.44	1284.29
1739	ENSG00000213742	ZNF337-AS1	58.6651	0.690522	0.335902	2.05572	0.0398091	0.501426	63.4625	41.4603	33.4432	28.0917	46.7569	56.1148	84.5331	68.5069	94.5355	35.0394	59.3991	92.6376
1740	ENSG00000117385	P3H1	620.258	0.623229	0.303317	2.05471	0.0399066	0.501898	486.546	299.978	491.939	658.595	493.666	498.967	1075.55	615.192	675.126	1150.77	484.102	512.665
1741	ENSG00000224739	NA	4.46651	3.18771	1.55148	2.05462	0.0399154	0.501898	3.02202	2.43884	0	0	0	0	4.49644	0	1.78369	0	3.95994	37.8972
1742	ENSG00000253741	LNCOC1	35.1466	1.39181	0.677298	2.05494	0.0398852	0.501898	32.2349	43.8992	8.63051	20.2885	5.43685	6.06646	81.8352	113.721	60.6454	12.9093	11.8798	24.2121
1743	ENSG00000211809	TRAV27	10.1897	-2.10426	1.02434	-2.05426	0.0399504	0.502051	57.4184	1.21942	17.261	10.1442	2.17474	10.6163	0	8.22083	0	0.92209	6.92989	7.3689
1744	ENSG00000121057	AKAP1	731.276	0.610315	0.297167	2.05378	0.0399968	0.502058	451.289	736.53	428.289	408.891	531.724	916.036	880.403	1112.55	867.764	972.805	988.994	480.031
1745	ENSG00000167614	TTYH1	33.795	1.1226	0.546541	2.05401	0.0399746	0.502058	8.05873	10.9748	12.9458	14.0459	25.0095	56.1148	77.3388	21.9222	28.539	82.066	31.6795	36.8445
1746	ENSG00000270607	NAV2-AS6	28.7271	1.21361	0.591028	2.05339	0.0400349	0.502248	8.05873	17.0719	30.2068	18.7278	7.61158	21.9909	20.6836	53.4354	16.945	65.4684	78.2088	6.3162
1747	ENSG00000156413	FUT6	719.987	1.51929	0.740136	2.05272	0.0401002	0.502778	48.3524	914.566	80.9111	359.73	617.626	213.843	1857.93	419.262	1375.22	56.2475	2007.69	688.466
1748	ENSG00000134864	GGACT	588.848	-1.87354	0.912886	-2.05232	0.0401383	0.502969	88.646	2368.12	1720.71	67.108	83.7274	1223.15	107.915	53.4354	130.209	131.859	1052.35	38.9499
1749	ENSG00000149926	TLCD3B	3.35446	2.2225	1.08372	2.05081	0.0402858	0.504528	1.00734	4.87768	0	0.780326	0	0.758308	1.79858	0	9.81028	10.143	7.91987	3.1581
1750	ENSG00000286115		9.98917	1.43038	0.697575	2.05051	0.0403149	0.504605	12.0881	2.43884	4.31526	2.34098	4.34948	6.82477	32.3744	21.9222	16.945	10.143	2.96995	3.1581
1751	ENSG00000145416	MARCHF1	281.792	-0.908356	0.443053	-2.05022	0.040343	0.504667	680.962	129.259	498.412	348.025	382.754	166.828	99.821	186.339	247.933	314.433	109.888	216.856
1752	ENSG00000226124	FTCDNL1	121.346	0.721883	0.352419	2.04836	0.0405243	0.506646	109.8	59.7516	62.5712	121.731	117.436	78.1057	172.663	101.39	99.8865	94.0532	269.276	169.485
1753	ENSG00000057468	MSH4	9.31248	1.4875	0.726814	2.04661	0.0406965	0.508376	5.0367	3.65826	0	3.90163	6.52422	9.858	14.3886	19.1819	8.91844	3.68836	3.95994	32.6337
1754	ENSG00000263961	RHEX	745.486	-1.17577	0.574534	-2.04648	0.0407091	0.508376	3318.18	781.649	509.2	796.713	427.336	367.779	208.635	669.997	951.598	304.29	300.955	309.494
1755	ENSG00000183813	CCR4	40.0512	-1.31535	0.64291	-2.04593	0.0407629	0.508414	136.998	29.2661	121.906	18.7278	18.4853	17.4411	6.29502	23.2923	29.4309	13.8314	21.7797	43.1607
1756	ENSG00000131269	ABCB7	487.428	0.44245	0.216261	2.0459	0.0407658	0.508414	490.575	490.207	397.004	338.661	419.725	343.514	606.12	742.615	429.869	444.447	614.78	531.614
1757	ENSG00000078747	ITCH	620.502	0.45771	0.223738	2.04574	0.0407817	0.508414	450.281	452.405	483.309	572.759	594.791	583.897	1054.86	616.562	718.826	765.335	643.49	509.507
1758	ENSG00000171611	PTCRA	8.1299	-1.84968	0.904434	-2.04513	0.0408422	0.508878	14.1028	10.9748	25.8915	7.02293	10.8737	7.58308	1.79858	0	0	0	10.8898	8.4216
1759	ENSG00000101916	TLR8	147.401	-1.04902	0.513104	-2.04446	0.0409078	0.509405	397.9	90.2372	266.467	181.816	184.853	71.281	73.7416	84.9486	110.589	113.417	18.8097	174.748
1760	ENSG00000152061	RABGAP1L	343.398	-0.583114	0.285356	-2.04346	0.0410065	0.509643	496.619	258.517	564.22	476.779	413.2	262.375	255.398	226.073	254.176	421.395	259.376	232.647
1761	ENSG00000196260	SFTA2	4.67435	-2.25664	1.10439	-2.04333	0.0410197	0.509643	11.0808	24.3884	3.23644	0	2.17474	5.30816	2.69786	4.11041	0	0	0.989984	2.1054
1762	ENSG00000151490	PTPRO	117.926	-0.846656	0.414399	-2.04309	0.0410432	0.509643	197.439	76.8235	309.62	84.2752	131.572	109.196	41.3672	135.644	94.5355	83.9102	63.359	87.3741
1763	ENSG00000261537		7.30876	2.29339	1.12241	2.04328	0.041025	0.509643	0	6.09711	4.31526	3.1213	0	1.51662	45.8637	0	0.891844	13.8314	8.90986	3.1581
1764	ENSG00000060558	GNA15	109.525	-0.669043	0.327329	-2.04395	0.0409587	0.509643	158.153	104.87	143.482	184.937	110.912	104.647	45.8637	63.0263	93.6436	140.158	60.389	104.217
1765	ENSG00000257093	DENND11	80.8568	0.60214	0.294933	2.04162	0.0411896	0.511014	44.323	49.9963	61.4924	99.1014	82.6401	47.7734	114.21	75.3576	121.291	98.6636	72.2689	103.165
1766	ENSG00000167716	WDR81	891.211	0.537601	0.263335	2.04151	0.0412002	0.511014	781.697	625.563	730.357	838.85	600.228	784.849	863.317	1341.37	1399.3	1331.5	605.87	791.63
1767	ENSG00000287978		386.032	0.977532	0.479119	2.04027	0.0413232	0.51109	174.27	139.014	463.89	338.661	257.707	186.544	133.095	402.821	779.472	281.237	418.763	1056.91
1768	ENSG00000054219	LY75	211.219	-0.925594	0.453683	-2.04018	0.0413325	0.51109	488.56	114.626	204.975	529.841	218.561	103.13	84.5331	221.962	110.589	189.951	124.738	143.167
1769	ENSG00000228427		46.3124	-1.22983	0.602848	-2.04004	0.0413464	0.51109	81.5946	21.9496	174.768	44.4786	45.6695	21.2326	4.49644	26.0326	25.8635	48.8708	20.7897	40.0026
1770	ENSG00000169371	SNUPN	109.156	0.850357	0.416729	2.04055	0.0412956	0.51109	77.5653	42.6797	45.3102	166.209	85.9022	49.29	231.117	79.468	121.291	191.795	111.868	107.375
1771	ENSG00000160888	IER2	1768.87	-0.838715	0.411082	-2.04026	0.0413242	0.51109	1440.5	2942.46	1169.43	1062.02	2467.24	4532.41	846.23	991.98	807.119	1290	1927.5	1749.59
1772	ENSG00000159267	HLCS	405.096	1.04848	0.513909	2.0402	0.0413304	0.51109	227.659	115.845	194.187	511.113	267.493	267.683	1607.03	279.508	499.433	358.693	268.286	264.228
1773	ENSG00000261170		408.006	1.05547	0.517604	2.03914	0.0414358	0.511906	41.301	408.506	245.97	369.094	167.455	357.921	424.464	504.211	611.805	134.625	812.777	817.948
1774	ENSG00000206337	HCP5	1056.69	-0.862374	0.422964	-2.03888	0.0414618	0.511938	1414.31	948.71	1534.07	1705.79	1590.82	987.317	230.218	261.696	742.906	1188.57	1031.56	1044.28
1775	ENSG00000260122		3.43504	1.85181	0.908599	2.0381	0.0415404	0.51262	2.01468	4.87768	0	1.56065	0	0.758308	6.29502	4.11041	11.594	2.76627	1.97997	5.2635
1776	ENSG00000286156	BMS1P23	275.866	1.34468	0.659911	2.03768	0.0415824	0.51285	341.489	354.852	59.3348	20.2885	68.5043	90.997	310.254	1030.34	216.718	297.835	402.924	116.85
1777	ENSG00000130037	KCNA5	19.7477	1.41535	0.694931	2.03668	0.0416821	0.51379	8.05873	6.09711	4.31526	28.0917	5.43685	12.1329	20.6836	2.74028	9.81028	52.5591	21.7797	65.2674
1778	ENSG00000261065		4.9467	1.71111	0.840339	2.03622	0.0417286	0.514074	2.01468	3.65826	3.23644	0	5.43685	0	1.79858	10.9611	12.4858	5.53254	7.91987	6.3162
1779	ENSG00000238123	MID1IP1-AS1	10.0283	1.95564	0.960659	2.03573	0.0417777	0.51425	5.0367	9.75537	4.31526	4.68196	1.08737	0	43.1658	31.5132	0.891844	14.7534	1.97997	3.1581
1780	ENSG00000136783	NIPSNAP3A	779.977	-0.639318	0.314067	-2.03561	0.0417899	0.51425	834.078	945.051	1645.19	626.602	852.498	796.982	639.394	569.977	427.193	372.524	887.026	763.208
1781	ENSG00000261087	ZNNT1	169.746	0.693462	0.340797	2.03483	0.0418682	0.514739	192.402	89.0177	119.748	113.147	107.65	156.211	371.406	195.93	268.445	140.158	121.768	161.063
1782	ENSG00000184922	FMNL1	443.438	-0.727525	0.357551	-2.03474	0.0418766	0.514739	803.858	348.754	719.569	602.412	493.666	349.58	155.577	293.21	498.541	461.045	211.857	383.183
1783	ENSG00000197249	SERPINA1	92357.3	1.56591	0.769683	2.03448	0.0419031	0.514776	133227	46046.6	29593	5899.26	34327.2	30733.5	70499.7	388471	34907.7	273257	52541.4	8784.78
1784	ENSG00000155760	FZD7	81.4046	0.810963	0.398672	2.03416	0.0419354	0.514884	56.4111	39.0215	39.9161	109.246	52.1937	56.8731	68.3459	143.864	186.395	51.637	78.2088	94.743
1785	ENSG00000286482		5.11702	-1.46995	0.72275	-2.03383	0.0419688	0.515006	7.05139	2.43884	10.7881	10.9246	6.52422	7.58308	8.09359	1.37014	2.67553	0.92209	1.97997	1.0527
1786	ENSG00000163467	TSACC	11.8937	1.35929	0.668529	2.03326	0.0420263	0.515302	2.01468	6.09711	9.70933	3.1213	10.8737	8.34139	43.1658	20.5521	5.35106	6.45463	21.7797	5.2635
1787	ENSG00000250433	CLSTN2-AS1	5.08143	3.16147	1.55568	2.03221	0.0421325	0.515302	4.02936	0	0	0	2.17474	0	0	0	5.35106	7.37672	0.989984	41.0553
1788	ENSG00000154917	RAB6B	161.711	1.01343	0.498549	2.03276	0.042077	0.515302	249.821	113.406	48.5466	54.6228	116.349	60.6646	241.009	89.059	85.617	395.577	223.736	262.122
1789	ENSG00000102057	KCND1	22.0134	0.777846	0.382713	2.03245	0.042108	0.515302	15.1101	18.2913	15.1034	10.9246	28.2716	10.6163	30.5758	19.1819	26.7553	43.3382	21.7797	24.2121
1790	ENSG00000185697	MYBL1	81.352	-1.09358	0.537935	-2.03292	0.0420605	0.515302	165.204	42.6797	67.9653	45.2589	55.4558	288.157	38.6694	35.6236	109.697	43.3382	50.4892	33.6864
1791	ENSG00000101040	ZMYND8	962.532	0.961986	0.473373	2.03219	0.0421341	0.515302	720.249	648.732	384.058	444.005	526.287	1194.34	1447.85	1751.04	1334.2	2314.45	467.273	317.915
1792	ENSG00000101236	RNF24	337.795	0.564835	0.278007	2.03173	0.0421808	0.515585	334.437	226.812	227.63	231.757	309.9	304.082	613.314	515.172	313.037	420.473	248.486	308.441
1793	ENSG00000145244	CORIN	8.51499	1.67844	0.826309	2.03124	0.0422302	0.515901	5.0367	12.1942	2.15763	1.56065	3.26211	0.758308	17.0865	1.37014	11.594	36.8836	3.95994	6.3162
1794	ENSG00000204624	DISP3	4.76086	2.11322	1.04117	2.02965	0.042392	0.516452	0	1.21942	3.23644	1.56065	0	4.54985	7.1943	1.37014	7.13475	11.0651	19.7997	0
1795	ENSG00000272510		93.1131	1.27716	0.629254	2.02964	0.0423932	0.516452	10.0734	93.8954	61.4924	35.1147	102.213	24.2659	35.0722	67.1368	320.172	62.7021	233.636	71.5836
1796	ENSG00000170180	GYPA	8.03006	-2.08421	1.02678	-2.02985	0.0423722	0.516452	28.2055	21.9496	4.31526	17.1672	6.52422	0	3.59715	0	6.24291	0	0.989984	7.3689
1797	ENSG00000141504	SAT2	3355.61	0.567955	0.279758	2.03016	0.04234	0.516452	2314.87	3881.42	2870.72	1879.81	2792.36	2481.94	2956.86	5673.74	2697.83	3019.85	5044.96	4652.93
1798	ENSG00000225370		6.74667	-1.51565	0.746727	-2.02972	0.0423847	0.516452	11.0808	4.87768	4.31526	20.2885	10.8737	8.34139	0	5.48055	8.91844	3.68836	0.989984	2.1054
1799	ENSG00000133065	SLC41A1	612.969	0.575094	0.283534	2.02831	0.0425289	0.517034	308.246	379.24	477.915	776.424	630.674	381.429	569.249	617.932	890.06	626.099	791.987	906.375
1800	ENSG00000196420	S100A5	4.21951	-2.02749	0.999628	-2.02824	0.0425354	0.517034	13.0954	7.31653	10.7881	3.1213	1.08737	5.30816	3.59715	1.37014	0	0	4.94992	0
1801	ENSG00000249171		6.14949	6.10172	3.00796	2.02852	0.0425071	0.517034	0	0	0	0	0	0	0	10.9611	0	61.78	0	1.0527
1802	ENSG00000156113	KCNMA1	2092.67	1.25299	0.617653	2.02863	0.0424955	0.517034	1053.68	335.341	1078.81	1451.41	1179.8	2322.7	535.076	1361.92	3230.26	651.918	8261.42	3649.71
1803	ENSG00000119321	FKBP15	540.131	-0.36482	0.179971	-2.0271	0.0426522	0.518167	679.955	463.38	709.86	710.877	577.393	506.55	469.428	460.366	424.518	491.474	509.842	477.926
1804	ENSG00000205279	CTXN3	36.8646	4.44499	2.19367	2.02628	0.0427362	0.518325	0	6.09711	0	13.2655	0	0	0	2.74028	125.75	0	136.618	157.905
1805	ENSG00000122557	HERPUD2	662.081	-0.329952	0.162833	-2.02632	0.0427322	0.518325	696.073	821.89	582.56	721.801	848.148	754.516	543.17	587.789	670.667	552.332	537.561	628.462
1806	ENSG00000257718	CPNE8-AS1	95.6778	0.83423	0.411678	2.02642	0.0427222	0.518325	38.279	157.305	76.5958	42.1376	47.8442	51.5649	172.663	105.501	137.344	60.8579	147.508	110.534
1807	ENSG00000137265	IRF4	52.1128	-1.17743	0.581282	-2.02557	0.0428089	0.518919	133.976	21.9496	154.27	54.6228	35.8832	32.6072	20.6836	46.5847	36.5656	20.286	7.91987	60.0039
1808	ENSG00000225647		4.84303	2.31229	1.14196	2.02485	0.0428832	0.519105	0	6.09711	1.07881	0.780326	2.17474	0	0	1.37014	16.0532	2.76627	9.89984	17.8959
1809	ENSG00000207782	MIR150	7.63204	-1.495	0.738371	-2.02473	0.0428953	0.519105	8.05873	4.87768	28.0492	12.4852	5.43685	8.34139	0	8.22083	4.45922	6.45463	0.989984	4.2108
1810	ENSG00000142173	COL6A2	2116.34	1.22088	0.602882	2.02506	0.0428608	0.519105	1799.11	564.592	844.711	1861.86	1669.11	884.945	5117.85	2823.85	651.046	7530.71	601.91	1046.38
1811	ENSG00000114541	FRMD4B	719.392	-0.400437	0.19782	-2.02425	0.042944	0.519407	965.033	974.317	815.583	607.094	782.906	767.408	452.342	612.452	639.452	720.152	663.29	632.673
1812	ENSG00000271926		8.05195	-1.26679	0.626007	-2.0236	0.0430114	0.519934	19.1395	7.31653	9.70933	12.4852	14.1358	6.06646	10.7915	0	4.45922	6.45463	3.95994	2.1054
1813	ENSG00000179698	WDR97	12.6751	-0.944787	0.467015	-2.02303	0.0430696	0.520351	23.1688	10.9748	7.5517	24.9704	10.8737	21.9909	8.09359	10.9611	8.0266	11.0651	4.94992	9.4743
1814	ENSG00000197847	SLC22A20P	9.06063	1.50926	0.746181	2.02264	0.0431099	0.520551	1.00734	3.65826	7.5517	4.68196	2.17474	9.0997	40.468	5.48055	18.7287	4.61045	4.94992	6.3162
1815	ENSG00000179044	EXOC3L1	150.211	-0.782213	0.386799	-2.02227	0.043148	0.520724	131.962	293.88	159.664	175.573	156.581	222.184	76.4395	73.9874	71.3475	117.105	73.2588	250.543
1816	ENSG00000189134	NKAPL	13.4391	-1.4647	0.724516	-2.02163	0.0432148	0.521243	7.05139	25.6078	10.7881	45.2589	26.0969	3.03323	0.899288	16.4417	3.56738	10.143	3.95994	8.4216
1817	ENSG00000272449		110.025	0.762316	0.377193	2.02102	0.0432776	0.521309	77.5653	84.1401	85.2263	73.3506	116.349	53.8399	58.4537	91.7992	169.45	262.796	150.478	96.8484
1818	ENSG00000116005	PCYOX1	1447.35	0.49564	0.245259	2.02089	0.0432917	0.521309	710.175	1682.8	1124.12	1376.49	1184.15	1129.88	2135.81	1603.06	1912.11	1652.39	1592.88	1264.29
1819	ENSG00000172262	ZNF131	363.84	-0.370872	0.183509	-2.021	0.04328	0.521309	463.377	392.654	474.678	369.874	309.9	450.435	299.463	376.788	308.578	295.069	283.136	342.128
1820	ENSG00000162814	SPATA17	81.2635	1.30333	0.645246	2.0199	0.0433939	0.521824	28.2055	46.338	34.5221	74.131	55.4558	42.4652	21.5829	31.5132	97.211	25.8185	398.964	118.955
1821	ENSG00000234678	ELF3-AS1	38.921	0.845275	0.418598	2.0193	0.0434558	0.521824	40.2936	23.169	44.2314	31.9934	15.2232	12.1329	59.353	54.8055	32.9982	23.9743	59.3991	69.4782
1822	ENSG00000186231	KLHL32	59.8277	-0.98083	0.485502	-2.02024	0.0433584	0.521824	80.5873	46.338	69.0441	102.223	133.746	44.7402	23.3815	24.6625	41.9167	64.5463	9.89984	76.8471
1823	ENSG00000149043	SYT8	5.4828	3.37291	1.6705	2.0191	0.0434769	0.521824	5.0367	0	0	0	0	0.758308	26.9786	0	0	22.1302	10.8898	0
1824	ENSG00000122043	LINC00544	14.1102	-1.96321	0.972158	-2.01944	0.0434414	0.521824	56.4111	3.65826	50.7043	7.02293	14.1358	3.03323	0	4.11041	13.3777	12.9093	3.95994	0
1825	ENSG00000226608	FTLP3	113.056	-0.848019	0.419999	-2.01909	0.0434774	0.521824	73.5359	168.28	185.556	76.4719	297.939	71.281	132.195	58.9159	82.0497	63.6242	75.2388	71.5836
1826	ENSG00000143869	GDF7	69.8245	1.3869	0.687223	2.01813	0.043578	0.521862	19.1395	85.3595	5.39407	66.3277	23.9221	31.8489	252.7	15.0715	25.8635	122.638	130.678	58.9512
1827	ENSG00000227258	SMIM2-AS1	1921.18	1.47851	0.732692	2.01792	0.0435997	0.521862	132.969	1687.68	718.49	554.031	2125.81	869.779	6432.61	787.829	1228.07	153.067	5897.34	2466.48
1828	ENSG00000099337	KCNK6	88.9388	-0.664608	0.329251	-2.01855	0.0435345	0.521862	159.16	95.1148	129.458	101.442	100.038	69.7643	53.9573	56.1757	85.617	98.6636	33.6595	84.216
1829	ENSG00000205209	SCGB2B2	14.5607	0.786007	0.389464	2.01818	0.0435729	0.521862	9.06607	13.4136	8.63051	10.9246	8.69895	13.6495	26.0794	9.59097	20.5124	17.5197	19.7997	16.8432
1830	ENSG00000188677	PARVB	418.998	0.845647	0.418936	2.01856	0.043533	0.521862	420.061	237.787	207.132	180.255	250.095	501.242	535.076	1148.18	289.849	574.462	438.563	245.279
1831	ENSG00000101049	SGK2	616.998	1.25701	0.623154	2.01718	0.0436769	0.522501	386.819	397.531	206.053	273.894	345.783	574.039	3210.46	478.178	208.692	385.434	761.298	175.801
1832	ENSG00000234091		39.8621	0.978443	0.485159	2.01675	0.0437221	0.522756	6.04405	45.1186	9.70933	39.7966	26.0969	34.1239	51.2594	46.5847	60.6454	23.9743	79.1987	55.7931
1833	ENSG00000196839	ADA	443.76	1.11964	0.555402	2.0159	0.04381	0.523521	383.797	199.985	499.491	198.203	228.348	168.344	845.331	1470.16	187.287	777.322	207.897	158.958
1834	ENSG00000101166	PRELID3B	1378.45	0.51666	0.256326	2.01564	0.0438378	0.523567	1339.76	1241.37	1395.99	774.083	1024.3	1029.78	1839.94	2458.03	1255.72	1463.36	1563.19	1155.86
1835	ENSG00000237813		15.8938	1.28875	0.639909	2.01396	0.0440138	0.52524	3.02202	10.9748	16.1822	7.02293	11.9611	6.06646	19.7843	71.2472	13.3777	7.37672	7.91987	15.7905
1836	ENSG00000165995	CACNB2	80.5399	1.14024	0.566262	2.01362	0.0440498	0.52524	26.1909	20.7302	48.5466	98.3211	59.8053	47.7734	46.763	38.3639	255.067	122.638	30.6895	171.59
1837	ENSG00000176845	METRNL	439.022	0.726917	0.360975	2.01376	0.0440348	0.52524	398.907	301.197	302.068	342.563	313.162	326.072	469.428	608.341	229.204	694.334	1017.7	265.28
1838	ENSG00000163154	TNFAIP8L2	206.191	-0.906106	0.450671	-2.01057	0.0443707	0.527772	380.775	98.7731	308.541	349.586	354.482	121.329	85.4324	135.644	198.881	245.276	53.4592	142.115
1839	ENSG00000115363	EVA1A	1319.3	0.904517	0.449738	2.01121	0.0443031	0.527772	940.856	1075.53	312.856	1115.87	884.031	1182.96	2327.36	2130.56	660.856	953.441	3362.98	884.268
1840	ENSG00000145014	TMEM44	432.628	1.10961	0.551861	2.01066	0.0443611	0.527772	451.289	240.226	176.926	172.452	203.338	399.628	939.756	776.868	388.844	1147.08	226.706	68.4255
1841	ENSG00000101966	XIAP	669.862	0.46977	0.233716	2.01	0.0444307	0.527772	599.368	442.65	592.269	564.956	679.606	492.142	1026.09	689.179	833.874	568.93	985.034	564.247
1842	ENSG00000180539	LINC02908	14.0915	-1.74924	0.869775	-2.01114	0.0443109	0.527772	38.279	1.21942	22.6551	41.3573	21.7474	5.30816	0.899288	1.37014	24.0798	1.84418	2.96995	7.3689
1843	ENSG00000099377	HSD3B7	3893.3	0.844809	0.420262	2.0102	0.0444105	0.527772	2329.98	4210.66	1772.49	2177.89	2530.31	3687.65	2894.81	8298.93	4826.66	2856.64	9219.72	1913.81
1844	ENSG00000176974	SHMT1	3332.92	0.519207	0.258306	2.01004	0.0444266	0.527772	2100.31	4126.52	2524.43	1936.77	3317.56	2433.41	5409.22	3796.65	3936.6	3821.14	3782.73	2809.66
1845	ENSG00000184661	CDCA2	602.121	0.834618	0.415293	2.00971	0.0444623	0.52786	210.534	653.61	452.023	368.314	558.908	352.613	313.852	1422.2	617.156	1228.22	589.041	458.977
1846	ENSG00000183775	KCTD16	64.7001	-1.76734	0.879918	-2.00853	0.0445875	0.528773	8.05873	24.3884	81.9899	111.587	20.66	353.372	1.79858	5.48055	15.1613	27.6627	100.978	25.2648
1847	ENSG00000255468	B4GAT1-DT	46.1567	0.824048	0.410241	2.00869	0.0445699	0.528773	52.3817	9.75537	39.9161	22.6295	36.9706	37.9154	40.468	71.2472	37.4575	97.7416	49.4992	57.8985
1848	ENSG00000167995	BEST1	166.483	1.31922	0.6571	2.00764	0.0446818	0.529605	157.145	60.9711	97.0933	85.0555	123.96	47.0151	26.9786	790.57	118.615	328.264	66.329	95.7957
1849	ENSG00000168890	TMEM150A	1156.28	0.543392	0.270754	2.00696	0.0447539	0.530173	859.262	1395.02	789.692	1009.74	750.285	842.48	1002.71	1808.58	1691.83	1463.36	1443.4	819.001
1850	ENSG00000203645	LINC00501	56.4632	1.19017	0.593419	2.00562	0.0448968	0.531578	7.05139	69.507	7.5517	19.5081	83.7274	19.716	34.1729	80.8381	72.2394	78.3777	122.758	82.1106
1851	ENSG00000282849		14.3342	2.17683	1.08567	2.00506	0.0449565	0.531743	10.0734	1.21942	3.23644	4.68196	11.9611	0	17.9858	65.7666	4.45922	51.637	0.989984	0
1852	ENSG00000142959	BEST4	96.9325	1.78488	0.890753	2.00379	0.0450923	0.531743	77.5653	35.3632	16.1822	44.4786	68.5043	19.716	339.931	8.22083	30.3227	469.344	1.97997	51.5823
1853	ENSG00000265531	FCGR1CP	83.9651	-1.33162	0.66531	-2.0015	0.0453383	0.531743	280.041	42.6797	207.132	95.9801	56.5432	37.9154	13.4893	137.014	22.2961	74.6893	19.7997	20.0013
1854	ENSG00000116791	CRYZ	4550.32	0.521097	0.260557	1.99994	0.0455073	0.531743	3242.63	5058.16	3967.88	3776.78	3444.79	2934.65	4619.64	5340.8	6839.55	3160.93	7571.4	4646.62
1855	ENSG00000115616	SLC9A2	5.76209	6.00881	3.00828	1.99742	0.0457791	0.531743	0	0	0	0	0	0	21.5829	0	44.5922	0	2.96995	0
1856	ENSG00000237638	LINC02245	152.83	-0.700555	0.350149	-2.00073	0.0454212	0.531743	289.107	108.528	304.226	99.8817	167.455	166.069	73.7416	123.312	90.9681	137.391	139.588	133.693
1857	ENSG00000272211		8.14561	-1.93353	0.966401	-2.00076	0.0454186	0.531743	20.1468	45.1186	3.23644	1.56065	6.52422	0.758308	3.59715	6.85069	1.78369	0	3.95994	4.2108
1858	ENSG00000270277		5.49776	-1.31614	0.65902	-1.99711	0.045813	0.531743	7.05139	7.31653	4.31526	6.24261	7.61158	14.4079	4.49644	2.74028	0	4.61045	2.96995	4.2108
1859	ENSG00000172936	MYD88	541.77	-0.610167	0.304961	-2.0008	0.0454137	0.531743	943.878	777.991	824.214	372.996	475.18	533.849	267.089	465.847	376.358	401.109	622.7	440.029
1860	ENSG00000181789	COPG1	2325.78	0.63212	0.316553	1.99689	0.0458373	0.531743	1410.28	2031.56	1261.13	2424.47	2312.83	1506	4388.53	1419.46	3347.09	2842.8	3046.18	1919.07
1861	ENSG00000251615		127.277	-0.631245	0.316032	-1.99741	0.0457805	0.531743	149.086	104.87	113.275	221.613	220.736	119.054	93.526	52.0652	129.317	90.3648	120.778	112.639
1862	ENSG00000082074	FYB1	869.361	-0.939627	0.468813	-2.00427	0.0450415	0.531743	2358.19	436.553	1617.14	874.745	1074.32	495.933	228.419	908.401	719.718	807.751	356.394	554.773
1863	ENSG00000164509	IL31RA	21.5627	3.62991	1.81461	2.00038	0.0454594	0.531743	3.02202	13.4136	0	0.780326	0	2.27492	186.153	2.74028	0.891844	0	0	49.4769
1864	ENSG00000273293		26.7876	-1.07941	0.540446	-1.99725	0.0457976	0.531743	39.2863	26.8273	42.0738	45.2589	19.5726	45.4985	5.39573	9.59097	49.9433	18.4418	6.92989	12.6324
1865	ENSG00000063587	ZNF275	158.352	0.573859	0.286458	2.00329	0.0451459	0.531743	139.013	106.09	97.0933	175.573	158.756	87.2054	280.578	149.345	166.775	178.885	135.628	225.278
1866	ENSG00000253988		56.1358	-1.35854	0.679944	-1.99802	0.0457145	0.531743	198.446	24.3884	147.798	23.4098	48.9316	40.9486	3.59715	80.8381	18.7287	26.7406	19.7997	40.0026
1867	ENSG00000253570	RNF5P1	14.2693	-1.57075	0.784368	-2.00256	0.0452243	0.531743	18.1321	53.6545	3.23644	3.1213	44.5821	5.30816	0.899288	12.3312	6.24291	6.45463	9.89984	7.3689
1868	ENSG00000204706	MAMDC2-AS1	15.3492	-1.05955	0.52902	-2.00286	0.0451922	0.531743	9.06607	21.9496	21.5763	30.4327	28.2716	12.8912	4.49644	9.59097	3.56738	8.29881	10.8898	23.1594
1869	ENSG00000165272	AQP3	4589.36	1.12294	0.56237	1.9968	0.0458473	0.531743	6984.9	2620.54	3005.58	1629.32	2064.91	1024.47	3161	13883.6	1019.38	8011.12	6225.02	5442.46
1870	ENSG00000168062	BATF2	235.89	-0.605811	0.302853	-2.00035	0.0454624	0.531743	345.518	218.276	326.881	196.642	397.977	222.943	109.713	211.001	164.099	279.393	144.538	213.698
1871	ENSG00000152455	SUV39H2	63.0254	-0.645234	0.321823	-2.00493	0.0449702	0.531743	118.866	58.5322	100.33	46.8196	72.8537	63.6979	29.6765	58.9159	53.5106	41.4941	49.4992	62.1093
1872	ENSG00000165806	CASP7	501.948	-0.390131	0.194874	-2.00197	0.0452881	0.531743	645.706	554.837	612.766	521.258	546.947	536.124	381.298	342.534	597.536	369.758	468.263	446.345
1873	ENSG00000180525	DIP2C-AS1	398.383	1.27867	0.640249	1.99714	0.0458099	0.531743	283.063	241.445	117.591	113.928	492.578	147.112	44.0651	419.262	312.145	1622.88	745.458	241.068
1874	ENSG00000178449	COX14	1169.37	0.707836	0.354113	1.9989	0.0456193	0.531743	668.874	1290.15	720.648	667.959	1102.59	879.637	2778.8	790.57	1581.24	1200.56	1551.31	800.052
1875	ENSG00000200795	RNU4-1	29.8634	-1.81059	0.905601	-1.99932	0.0455735	0.531743	74.5432	19.5107	149.955	10.9246	19.5726	4.54985	3.59715	5.48055	0	39.6499	15.8397	14.7378
1876	ENSG00000275830		42.9545	1.88789	0.944784	1.99822	0.0456928	0.531743	18.1321	59.7516	15.1034	5.46228	0	11.3746	7.1943	258.956	12.4858	9.2209	85.1387	32.6337
1877	ENSG00000140105	WARS1	2037.13	-0.644918	0.322864	-1.99749	0.045772	0.531743	4006.2	2555.91	2339.95	1683.16	2707.55	1616.71	1063.86	2403.22	994.406	1408.03	2143.32	1523.26
1878	ENSG00000140092	FBLN5	963.785	2.47344	1.23454	2.00353	0.0451204	0.531743	20.1468	952.368	171.531	37.4556	126.135	457.26	143.886	2426.51	272.012	6893.55	27.7196	36.8445
1879	ENSG00000211812	TRAV26-2	11.2009	-1.66338	0.831458	-2.00056	0.0454403	0.531743	23.1688	6.09711	29.128	39.0163	2.17474	2.27492	0.899288	8.22083	8.0266	1.84418	1.97997	11.5797
1880	ENSG00000166710	B2M	248315	-0.848661	0.423325	-2.00475	0.0449899	0.531743	397974	298142	584257	143604	317174	174740	98054.8	140199	100941	146359	236821	341518
1881	ENSG00000255198	SNHG9	2928.49	0.769067	0.384064	2.00245	0.0452366	0.531743	1860.56	2168.13	2913.88	2792.79	940.574	2319.66	6806.71	1888.05	4632.24	1985.26	2975.89	3858.15
1882	ENSG00000103064	SLC7A6	189.812	-0.670512	0.334625	-2.00377	0.0450943	0.531743	276.011	136.575	336.59	206.786	215.299	228.251	183.455	101.39	140.02	248.964	80.1887	124.219
1883	ENSG00000272636	DOC2B	44.7217	-1.05188	0.52478	-2.00442	0.045025	0.531743	145.057	41.4603	46.389	61.6457	40.2327	27.2991	11.6907	27.4028	14.2695	69.1568	25.7396	26.3175
1884	ENSG00000183153	GJD3	51.033	-1.21544	0.608794	-1.99648	0.0458818	0.531743	58.4258	32.9244	76.5958	50.7212	126.135	83.4139	0.899288	15.0715	29.4309	63.6242	26.7296	48.4242
1885	ENSG00000276250		14.473	-1.19596	0.598837	-1.99713	0.0458106	0.531743	11.0808	13.4136	4.31526	41.3573	17.3979	33.3656	9.89217	2.74028	13.3777	10.143	3.95994	12.6324
1886	ENSG00000170190	SLC16A5	100.459	1.12872	0.563756	2.00213	0.0452703	0.531743	56.4111	43.8992	86.3051	59.3048	68.5043	63.6979	353.42	241.144	20.5124	90.3648	52.4692	69.4782
1887	ENSG00000183018	SPNS2	1633.86	0.997497	0.499164	1.99833	0.0456805	0.531743	746.44	1729.14	887.864	666.398	1835.48	678.686	3476.65	471.327	2870.85	1482.72	3798.57	962.168
1888	ENSG00000101444	AHCY	2376.05	0.921226	0.461409	1.99655	0.0458743	0.531743	1406.25	840.181	915.913	2301.18	2091.01	2298.43	8179.02	1582.51	2146.67	2023.07	2979.85	1748.53
1889	ENSG00000142530	GARIN5A	56.0676	1.17597	0.58706	2.00316	0.0451604	0.531743	43.3157	74.3847	9.70933	15.6065	26.0969	37.9154	205.937	20.5521	53.5106	61.78	36.6294	87.3741
1890	ENSG00000225872	LINC01529	5.02508	1.63108	0.816541	1.99755	0.0457656	0.531743	0	1.21942	1.07881	0.780326	5.43685	6.06646	6.29502	5.48055	5.35106	18.4418	5.93991	4.2108
1891	ENSG00000234155	LINC02535	32.3822	-1.65383	0.828695	-1.99571	0.0459658	0.531853	5.0367	193.888	19.4187	48.3802	23.9221	4.54985	3.59715	4.11041	16.945	12.9093	32.6695	23.1594
1892	ENSG00000230629	RPS23P8	698.434	-0.579381	0.290364	-1.99536	0.0460036	0.531853	891.497	779.21	408.871	939.512	1335.29	666.553	627.703	575.458	403.114	666.671	516.772	570.563
1893	ENSG00000127084	FGD3	221.087	-0.830041	0.416003	-1.99528	0.0460126	0.531853	339.474	145.111	439.077	412.792	220.736	141.045	92.6267	116.462	197.098	305.212	96.0285	147.378
1894	ENSG00000260193	LINC02846	9.89818	-1.19783	0.600088	-1.99609	0.0459242	0.531853	2.01468	17.0719	16.1822	12.4852	15.2232	19.716	1.79858	5.48055	3.56738	11.0651	8.90986	5.2635
1895	ENSG00000250041		7.52814	-1.91186	0.95795	-1.99578	0.0459581	0.531853	22.1615	4.87768	28.0492	3.90163	8.69895	3.79154	5.39573	0	0.891844	0	0.989984	11.5797
1896	ENSG00000146414	SHPRH	161.799	-0.579899	0.290851	-1.9938	0.0461741	0.532875	190.387	143.892	120.827	281.698	229.435	197.16	169.965	102.76	131.101	171.509	88.1086	114.744
1897	ENSG00000004809	SLC22A16	6.5014	1.61505	0.80995	1.99401	0.0461505	0.532875	6.04405	6.09711	4.31526	0	3.26211	0	9.89217	5.48055	4.45922	5.53254	11.8798	21.054
1898	ENSG00000167881	SRP68	1006.58	0.274419	0.137622	1.994	0.0461521	0.532875	864.299	990.17	798.322	926.247	953.623	933.477	1121.41	1189.28	1047.02	946.987	1170.16	1137.97
1899	ENSG00000204397	CARD16	3161.34	-0.918619	0.460839	-1.99336	0.0462217	0.533144	6443.96	3116.84	8026.38	2955.87	2413.96	1853.3	1432.57	3222.56	792.849	2053.49	1749.3	3874.99
1900	ENSG00000103404	USP31	51.9397	0.7928	0.397799	1.99296	0.0462654	0.533213	41.301	15.8525	37.7585	49.9409	46.7569	36.3988	91.7274	49.325	114.156	45.1824	64.349	30.5283
1901	ENSG00000184451	CCR10	43.7783	1.09133	0.547618	1.99286	0.0462764	0.533213	21.1542	20.7302	25.8915	39.7966	38.0579	21.9909	16.1872	82.2083	51.727	154.911	15.8397	36.8445
1902	ENSG00000084628	NKAIN1	113	1.81737	0.91219	1.99232	0.046336	0.533338	72.5285	109.748	70.1229	3.1213	31.5337	12.8912	151.98	635.744	114.156	125.404	27.7196	1.0527
1903	ENSG00000184205	TSPYL2	571.519	0.695482	0.34906	1.99245	0.0463222	0.533338	426.105	456.063	471.442	435.422	401.239	428.444	1448.75	553.536	534.215	904.57	474.202	324.232
1904	ENSG00000152104	PTPN14	724.819	0.419734	0.210792	1.99122	0.0464566	0.533606	620.522	562.153	570.693	853.677	521.937	591.48	866.014	596.01	969.435	807.751	745.458	992.696
1905	ENSG00000287601		9.30309	-1.01837	0.511324	-1.99163	0.0464114	0.533606	18.1321	13.4136	8.63051	15.6065	8.69895	10.6163	5.39573	2.74028	11.594	3.68836	8.90986	4.2108
1906	ENSG00000185008	ROBO2	10.1094	1.85135	0.929751	1.99124	0.046455	0.533606	4.02936	0	1.07881	0	6.52422	14.4079	8.99288	5.48055	6.24291	49.7929	7.91987	16.8432
1907	ENSG00000155962	CLIC2	349.559	-0.626177	0.314446	-1.99137	0.0464406	0.533606	424.091	287.783	721.727	421.376	464.307	225.976	184.354	349.385	254.176	339.329	231.656	290.545
1908	ENSG00000139597	N4BP2L1	481.381	-0.518757	0.260586	-1.99073	0.0465104	0.533943	558.067	470.697	667.786	511.113	482.792	711.293	264.391	337.054	473.569	366.07	315.805	617.935
1909	ENSG00000006453	BAIAP2L1	201.956	1.15446	0.580012	1.99041	0.0465455	0.534067	165.204	137.795	67.9653	39.7966	106.562	233.559	388.492	582.309	100.778	440.759	79.1987	81.0579
1910	ENSG00000189108	IL1RAPL2	4.37607	3.93795	1.97931	1.98956	0.0466399	0.534717	0	3.65826	0	0	0	0	0	30.143	0.891844	0	17.8197	0
1911	ENSG00000117971	CHRNB4	9.54476	2.6141	1.31412	1.98923	0.0466754	0.534717	3.02202	2.43884	2.15763	0	0	8.34139	73.7416	15.0715	0	1.84418	7.91987	0
1912	ENSG00000088766	CRLS1	36.619	0.980076	0.492637	1.98945	0.0466517	0.534717	26.1909	15.8525	24.8127	27.3114	10.8737	42.4652	83.6338	30.143	86.5089	21.2081	51.4792	18.9486
1913	ENSG00000180398	MCFD2	1707.84	0.377119	0.189688	1.9881	0.0468006	0.535673	1283.35	1738.89	1344.2	1447.5	1733.27	1367.99	2076.46	2464.88	1898.74	1505.77	1990.86	1642.21
1914	ENSG00000227477	STK4-DT	13.0977	1.34319	0.675637	1.98804	0.0468078	0.535673	3.02202	2.43884	15.1034	2.34098	2.17474	18.9577	35.0722	26.0326	19.6206	12.9093	7.91987	11.5797
1915	ENSG00000232079	LINC01697	965.14	0.886015	0.445803	1.98746	0.0468714	0.536121	985.179	518.254	581.481	146.701	1217.85	617.263	1668.18	1827.76	769.661	741.36	1521.61	986.38
1916	ENSG00000114993	RTKN	1594.58	0.685133	0.344841	1.98681	0.0469437	0.536667	897.541	1196.25	686.126	2159.16	1129.78	1267.89	3110.64	1916.82	1979.89	1043.81	2318.54	1428.51
1917	ENSG00000228262	LINC01320	3170.08	0.690862	0.347935	1.98561	0.0470769	0.536957	3524.69	1508.42	2345.34	2687.44	1995.32	2489.53	3399.31	4026.84	4433.36	1455.06	3535.23	6640.43
1918	ENSG00000213186	TRIM59	75.8113	-0.687041	0.345937	-1.98603	0.0470305	0.536957	145.057	67.0682	89.5416	99.8817	92.4264	67.4894	56.6551	45.2146	80.266	57.1696	24.7496	84.216
1919	ENSG00000145375	SPATA5	157.221	-0.43717	0.220142	-1.98586	0.047049	0.536957	187.365	128.039	199.581	177.134	191.377	200.952	97.1231	147.975	155.181	159.522	111.868	130.535
1920	ENSG00000240790	SND1-DT	6.83084	1.49864	0.755129	1.98461	0.0471879	0.536957	0	7.31653	4.31526	3.90163	2.17474	3.79154	5.39573	9.59097	0.891844	14.7534	10.8898	18.9486
1921	ENSG00000068308	OTUD5	1264.12	0.373587	0.188208	1.98497	0.0471483	0.536957	1193.7	1153.57	961.223	1290.66	1102.59	906.936	1817.46	1371.51	1406.44	1460.59	1439.44	1065.33
1922	ENSG00000181790	ADGRB1	13.934	1.6046	0.808529	1.98459	0.0471896	0.536957	17.1248	3.65826	1.07881	4.68196	11.9611	3.03323	44.9644	16.4417	31.2145	19.3639	0	13.6851
1923	ENSG00000181264	TLCD5	310.747	0.506983	0.255352	1.98543	0.0470971	0.536957	286.085	228.032	297.753	206.786	213.124	307.873	230.218	446.665	344.252	508.994	379.164	280.018
1924	ENSG00000168000	BSCL2	6.6402	1.27319	0.641369	1.98512	0.0471313	0.536957	2.01468	8.53595	2.15763	3.90163	2.17474	4.54985	14.3886	15.0715	7.13475	8.29881	1.97997	9.4743
1925	ENSG00000099860	GADD45B	1372.51	1.02874	0.518139	1.98546	0.0470931	0.536957	1673.19	1269.42	894.337	294.183	507.801	778.782	1403.79	2318.27	650.154	3364.71	2782.85	532.666
1926	ENSG00000245468	LINC02447	120.924	1.24997	0.629999	1.98409	0.0472463	0.537106	52.3817	149.989	17.261	42.9179	118.523	48.5317	34.1729	441.184	116.832	47.9487	128.698	252.648
1927	ENSG00000235821	IFITM4P	38.6633	1.09913	0.553986	1.98404	0.0472518	0.537106	29.2129	15.8525	64.7288	15.6065	11.9611	10.6163	28.7772	34.2534	47.2677	42.4161	31.6795	131.588
1928	ENSG00000124575	H1-3	201.503	-1.06174	0.535232	-1.98371	0.0472883	0.537242	820.983	78.0429	243.812	203.665	106.562	181.994	171.764	83.5784	73.1312	210.237	98.9984	145.273
1929	ENSG00000162063	CCNF	53.131	-0.797699	0.402243	-1.98313	0.0473533	0.537702	109.8	58.5322	73.3594	52.2818	44.5821	65.9728	14.3886	49.325	52.6188	59.0138	19.7997	37.8972
1930	ENSG00000106066	CPVL	2402.23	-1.02	0.514413	-1.98284	0.047385	0.537783	5372.15	1609.64	6622.84	1126.79	2548.79	2026.2	560.256	1572.92	702.773	1489.18	2987.77	2207.51
1931	ENSG00000126705	AHDC1	515.361	0.676789	0.341433	1.9822	0.0474565	0.538037	187.365	435.333	336.59	485.363	473.006	462.568	973.929	342.534	661.748	635.32	814.757	375.814
1932	ENSG00000275342	PRAG1	231.955	-0.751192	0.378961	-1.98224	0.0474521	0.538037	188.373	201.204	253.521	407.33	223.998	470.909	111.512	180.858	89.1844	258.185	275.216	123.166
1933	ENSG00000196460	RFX8	31.3314	-0.786834	0.397341	-1.98025	0.0476757	0.538849	26.1909	58.5322	28.0492	38.236	45.6695	41.7069	19.7843	15.0715	8.91844	38.7278	27.7196	27.3702
1934	ENSG00000171798	KNDC1	78.1934	1.83463	0.926381	1.98043	0.0476554	0.538849	40.2936	42.6797	25.8915	2.34098	28.2716	65.9728	194.246	178.118	4.45922	233.289	122.758	0
1935	ENSG00000129534	MIS18BP1	171.425	-0.600899	0.303396	-1.98058	0.0476386	0.538849	308.246	160.964	211.448	228.635	159.843	170.619	90.8281	120.572	104.346	236.055	128.698	136.851
1936	ENSG00000103647	CORO2B	22.515	1.97758	0.998291	1.98096	0.0475954	0.538849	6.04405	21.9496	2.15763	11.7049	10.8737	2.27492	118.706	2.74028	1.78369	85.7544	1.97997	4.2108
1937	ENSG00000101310	SEC23B	1133.65	0.556174	0.28079	1.98075	0.0476194	0.538849	961.003	848.717	1052.92	864.601	793.78	985.8	1789.58	1357.81	1815.79	645.463	1550.32	937.956
1938	ENSG00000235408	SNORA71B	11.3073	1.23384	0.62273	1.98134	0.0475535	0.538849	4.02936	6.09711	1.07881	11.7049	13.0484	4.54985	31.4751	12.3312	21.4043	16.5976	4.94992	8.4216
1939	ENSG00000118729	CASQ2	68.3476	1.54039	0.778293	1.97919	0.0477951	0.539864	6.04405	21.9496	83.0687	10.9246	34.7958	53.0816	218.527	94.5395	0.891844	48.8708	114.838	132.64
1940	ENSG00000227757		5.007	3.07055	1.55156	1.97901	0.0478148	0.539864	4.02936	0	0	0.780326	0	1.51662	18.885	0	32.1064	2.76627	0	0
1941	ENSG00000258962		6.17347	2.71148	1.37045	1.97853	0.0478687	0.540194	0	3.65826	0	0	0	6.06646	7.1943	5.48055	2.67553	47.0266	1.97997	0
1942	ENSG00000197465	GYPE	11.2178	-1.65201	0.83516	-1.97808	0.0479199	0.540493	25.1835	1.21942	17.261	27.3114	30.4463	0.758308	1.79858	5.48055	6.24291	12.9093	4.94992	1.0527
1943	ENSG00000287099		14.5986	2.22161	1.12382	1.97684	0.04806	0.541423	1.00734	13.4136	5.39407	0	2.17474	9.0997	2.69786	8.22083	32.9982	0	97.0185	3.1581
1944	ENSG00000271849	MAN2A1-DT	9.08194	-1.0373	0.524942	-1.97602	0.0481524	0.541423	10.0734	13.4136	17.261	10.9246	15.2232	6.82477	4.49644	1.37014	3.56738	6.45463	9.89984	9.4743
1945	ENSG00000029363	BCLAF1	834.266	-0.404949	0.204918	-1.97615	0.0481377	0.541423	976.113	798.721	837.16	1037.05	1119.99	935.752	812.057	494.62	910.573	783.777	664.279	641.094
1946	ENSG00000185507	IRF7	632.704	0.890465	0.450683	1.97581	0.0481758	0.541423	394.878	567.031	270.782	451.028	513.238	464.085	748.208	172.637	1027.4	1431.08	1206.79	345.286
1947	ENSG00000166482	MFAP4	62.4779	1.66391	0.841957	1.97625	0.0481267	0.541423	4.02936	45.1186	14.0246	9.36391	54.3685	53.0816	167.268	67.1368	7.13475	300.601	12.8698	14.7378
1948	ENSG00000125872	LRRN4	21.6348	2.22604	1.12639	1.97627	0.0481241	0.541423	36.2643	1.21942	2.15763	1.56065	0	4.54985	131.296	9.59097	13.3777	0	39.5994	20.0013
1949	ENSG00000197360	ZNF98	7.66793	-2.90515	1.46968	-1.97672	0.0480735	0.541423	0	68.2876	3.23644	0	2.17474	7.58308	0	0	0	5.53254	0.989984	4.2108
1950	ENSG00000235034	C19orf81	427.413	2.4013	1.21548	1.9756	0.0482001	0.541423	535.905	137.795	46.389	9.36391	44.5821	42.4652	3518.01	319.242	116.832	326.42	10.8898	21.054
1951	ENSG00000007171	NOS2	18.5165	-1.15766	0.586129	-1.9751	0.0482573	0.541788	5.0367	25.6078	11.867	22.6295	28.2716	59.9063	4.49644	10.9611	21.4043	15.6755	7.91987	8.4216
1952	ENSG00000070950	RAD18	82.0654	-0.62371	0.315857	-1.97466	0.0483064	0.542062	135.991	102.431	99.2509	78.8129	53.2811	127.396	74.6409	65.7666	45.484	97.7416	53.4592	50.5296
1953	ENSG00000273489		4.539	1.42854	0.723532	1.9744	0.0483367	0.542124	3.02202	2.43884	1.07881	2.34098	4.34948	1.51662	4.49644	8.22083	1.78369	5.53254	4.94992	14.7378
1954	ENSG00000116285	ERRFI1	1752.51	1.2042	0.610046	1.97396	0.0483868	0.54234	2101.31	1054.8	1038.9	293.403	507.801	1368.75	1620.52	2540.24	672.45	6944.26	2423.48	464.241
1955	ENSG00000176641	RNF152	715.41	1.07201	0.543122	1.97379	0.0484056	0.54234	119.874	496.304	178.004	538.425	1088.46	346.547	376.802	434.334	1797.96	1407.11	1164.22	636.884
1956	ENSG00000256037	MRPL40P1	4.51518	2.38526	1.20875	1.97333	0.0484582	0.542375	4.02936	2.43884	0	0.780326	0	1.51662	33.2737	5.48055	3.56738	0	0.989984	2.1054
1957	ENSG00000073008	PVR	418.997	0.839721	0.425511	1.97344	0.0484453	0.542375	254.857	451.186	254.6	248.144	259.881	334.414	1005.4	238.404	543.133	919.324	304.915	213.698
1958	ENSG00000116729	WLS	706.92	-0.928656	0.470741	-1.97276	0.0485234	0.542661	621.529	1241.37	916.992	955.119	941.662	884.945	267.988	356.236	458.408	932.233	80.1887	826.37
1959	ENSG00000270659		12.7034	-1.06649	0.540853	-1.97186	0.0486256	0.542661	19.1395	14.6331	22.6551	11.7049	26.0969	9.0997	3.59715	8.22083	16.945	2.76627	4.94992	12.6324
1960	ENSG00000237471		119.551	1.94972	0.988802	1.9718	0.0486324	0.542661	3.02202	121.942	10.7881	0	70.679	88.722	25.1801	258.956	133.777	110.651	593.001	17.8959
1961	ENSG00000225684	FAM225B	9.15391	1.56748	0.794817	1.97213	0.0485949	0.542661	6.04405	2.43884	3.23644	1.56065	7.61158	6.82477	47.6623	16.4417	4.45922	7.37672	1.97997	4.2108
1962	ENSG00000155252	PI4K2A	248.539	-0.590983	0.299623	-1.97242	0.0485614	0.542661	275.004	202.424	374.349	366.753	310.988	263.891	248.203	89.059	203.34	270.172	160.377	217.909
1963	ENSG00000100629	CEP128	75.047	-0.638745	0.323851	-1.97234	0.0485707	0.542661	143.042	90.2372	78.7534	82.7145	69.5916	83.4139	63.8494	84.9486	60.6454	54.4033	24.7496	64.2147
1964	ENSG00000283683	MYOCOS	1781.03	0.650536	0.330017	1.97122	0.0486983	0.542844	2121.46	1593.78	965.539	1939.89	585.005	1110.92	1773.4	1985.33	2234.07	1724.31	2951.14	2387.52
1965	ENSG00000160606	TLCD1	140.928	0.949408	0.481615	1.9713	0.0486894	0.542844	141.028	142.672	89.5416	69.449	42.4074	92.5136	408.277	52.0652	169.45	143.846	251.456	88.4268
1966	ENSG00000244414	CFHR1	20.3505	5.85439	2.97134	1.97028	0.048806	0.543768	2.01468	0	2.15763	0	0	0	0	212.371	0	27.6627	0	0
1967	ENSG00000120729	MYOT	34.2718	-1.47203	0.747516	-1.96922	0.0489276	0.544845	11.0808	78.0429	18.3398	77.2523	17.3979	100.097	16.1872	9.59097	16.0532	0	35.6394	31.581
1968	ENSG00000048707	VPS13D	590.325	0.510842	0.259487	1.96866	0.0489921	0.54501	318.32	471.916	609.53	519.697	487.141	514.891	524.285	637.114	681.369	1066.86	763.278	489.506
1969	ENSG00000256594		7.67241	-1.37234	0.697075	-1.96872	0.0489856	0.54501	8.05873	15.8525	15.1034	6.24261	17.3979	3.79154	0	5.48055	8.0266	2.76627	1.97997	7.3689
1970	ENSG00000146410	MTFR2	29.1664	-0.914587	0.464922	-1.96718	0.0491622	0.546624	76.5579	31.7049	50.7043	26.5311	20.66	22.7492	25.1801	19.1819	11.594	34.1173	8.90986	22.1067
1971	ENSG00000176153	GPX2	3.88931	2.24218	1.1401	1.96666	0.0492223	0.547014	0	2.43884	1.07881	0.780326	0	3.79154	23.3815	0	2.67553	5.53254	5.93991	1.0527
1972	ENSG00000015532	XYLT2	718.981	0.609182	0.309928	1.96556	0.0493494	0.548149	461.362	599.955	348.457	712.438	611.102	683.236	1556.67	546.685	928.41	757.036	793.967	628.462
1973	ENSG00000112799	LY86	1202.45	-0.732492	0.372715	-1.96529	0.0493811	0.548223	2195	913.346	2761.76	843.532	1220.03	1073.76	496.407	1309.85	865.981	923.012	709.819	1116.91
1974	ENSG00000082684	SEMA5B	3336.68	0.972079	0.494865	1.96433	0.0494919	0.548341	1171.54	3374.14	928.859	2628.14	2424.83	2992.28	11480.3	1666.09	3464.81	4716.49	3261.01	1931.7
1975	ENSG00000146411	SLC2A12	12.679	2.12276	1.08048	1.96464	0.0494558	0.548341	8.05873	0	6.47288	0.780326	0	12.8912	1.79858	15.0715	4.45922	91.2869	3.95994	7.3689
1976	ENSG00000254040		5.77866	1.76391	0.897822	1.96466	0.0494538	0.548341	3.02202	0	2.15763	1.56065	1.08737	7.58308	0	6.85069	17.8369	13.8314	5.93991	9.4743
1977	ENSG00000257660	ADCY6-DT	13.5647	1.28715	0.655227	1.96443	0.0494798	0.548341	9.06607	10.9748	6.47288	0.780326	6.52422	13.6495	19.7843	5.48055	17.8369	4.61045	29.6995	37.8972
1978	ENSG00000257764		42.9967	-1.58428	0.806617	-1.96411	0.0495179	0.548351	72.5285	39.0215	114.354	1.56065	110.912	48.5317	7.1943	9.59097	6.24291	3.68836	29.6995	72.6363
1979	ENSG00000168010	ATG16L2	782.274	-0.610543	0.310941	-1.96353	0.0495842	0.548808	1177.58	564.592	1050.76	1270.37	529.549	1079.07	382.197	522.023	752.716	870.453	590.031	597.934
1980	ENSG00000273062	RALGPS2-AS1	8.74196	1.26734	0.645567	1.96314	0.0496297	0.549034	7.05139	7.31653	3.23644	8.58359	3.26211	1.51662	15.2879	2.74028	13.3777	9.2209	5.93991	27.3702
1981	ENSG00000180532	ZSCAN4	6.66467	-1.43695	0.732043	-1.96293	0.0496547	0.549034	4.02936	25.6078	10.7881	9.36391	2.17474	6.82477	2.69786	0	2.67553	4.61045	5.93991	5.2635
1982	ENSG00000122543	OCM	3.54527	-1.55692	0.793287	-1.96262	0.0496903	0.549151	7.05139	4.87768	1.07881	4.68196	6.52422	7.58308	0.899288	1.37014	4.45922	0.92209	0.989984	2.1054
1983	ENSG00000167723	TRPV3	10.4773	2.3682	1.207	1.96206	0.0497552	0.549591	6.04405	0	8.63051	0	4.34948	1.51662	79.1373	13.7014	0.891844	8.29881	0	3.1581
1984	ENSG00000162069	BICDL2	495.003	1.70642	0.870051	1.96129	0.0498457	0.550036	125.918	520.693	323.644	27.3114	356.657	39.432	47.6623	1831.87	1298.52	1225.46	71.2789	71.5836
1985	ENSG00000064601	CTSA	6546.07	0.51622	0.263184	1.96144	0.0498279	0.550036	4236.88	5115.47	5859.04	5115.82	6215.4	5781.34	9768.97	6827.4	5048.73	11244.9	8489.12	4849.79
1986	ENSG00000117308	GALE	2018.17	0.758689	0.387084	1.96001	0.0499945	0.550603	846.166	3280.24	1714.24	856.018	1355.95	944.852	2218.54	3750.07	2659.48	2474.89	2668.01	1449.57
1987	ENSG00000122188	LAX1	20.8367	-0.978129	0.499199	-1.9594	0.0500665	0.550603	29.2129	21.9496	64.7288	25.7508	14.1358	9.858	11.6907	23.2923	16.945	11.9872	8.90986	11.5797
1988	ENSG00000115380	EFEMP1	1186.1	1.88957	0.964117	1.9599	0.0500078	0.550603	2408.55	135.356	103.566	165.429	56.5432	155.453	4539.61	4869.47	289.849	670.36	781.098	57.8985
1989	ENSG00000197093	GAL3ST4	538.703	-0.88895	0.453676	-1.95944	0.0500613	0.550603	885.453	260.956	1298.89	402.648	804.653	545.223	245.506	389.119	230.988	860.31	272.246	268.439
1990	ENSG00000279041		15.8371	0.94527	0.482248	1.96013	0.0499805	0.550603	6.04405	8.53595	5.39407	24.9704	8.69895	10.6163	18.885	15.0715	14.2695	17.5197	32.6695	27.3702
1991	ENSG00000149761	NUDT22	1904.9	0.382454	0.195195	1.95934	0.0500731	0.550603	1726.58	1691.34	1539.47	1823.62	1588.65	1553.77	2912.79	2174.41	2086.92	1863.54	2382.89	1514.84
1992	ENSG00000166897	ELFN2	48.8565	2.13074	1.08723	1.95979	0.05002	0.550603	27.1982	46.338	23.7339	1.56065	9.78632	0.758308	74.6409	8.22083	25.8635	14.7534	353.424	0
1993	ENSG00000073737	DHRS9	58.5815	-1.2049	0.615048	-1.95903	0.0501092	0.550724	56.4111	18.2913	243.812	16.3868	105.475	50.0483	35.9715	32.8833	46.3759	17.5197	19.7997	60.0039
1994	ENSG00000156381	ANKRD9	203.833	0.800464	0.408983	1.9572	0.0503236	0.552802	69.5065	199.985	117.591	175.573	167.455	162.278	333.636	189.079	204.232	244.354	495.982	86.3214
1995	ENSG00000286505		19.6841	1.18258	0.604294	1.95696	0.0503521	0.552839	4.02936	25.6078	8.63051	20.2885	10.8737	3.03323	13.4893	41.1041	49.9433	31.3511	8.90986	18.9486
1996	ENSG00000026508	CD44	2757.38	1.36916	0.699961	1.95605	0.0504587	0.553731	2121.46	935.296	2484.51	1016.76	1746.32	929.686	1002.71	15940.2	723.286	4154.94	902.866	1130.6
1997	ENSG00000196730	DAPK1	785.975	-0.715389	0.365887	-1.95522	0.0505571	0.554378	830.049	364.607	843.633	1374.15	661.121	1787.33	517.091	460.366	567.213	525.591	674.179	826.37
1998	ENSG00000267519	MIR23AHG	901.821	-1.24166	0.635079	-1.95513	0.0505682	0.554378	247.806	1764.5	856.578	285.599	439.297	4011.45	249.103	565.867	323.739	423.239	1066.21	588.459
[truncated: 37,117 more rows]

## Sheet: TableS4
Table S4: Direct RNA-seq recurrent vs nonrecurrent ccRCC differential gene expression analysis (reference genome mapped)
	Gene	Gene_name	baseMean	log2FoldChange	lfcSE	stat	pvalue	padj	R273	R314	R318	R320	R382	R395	R135	R171	R243	R254	R260	R329
1	ENSG00000156395	SORCS3	29.3134	5.97581	0.845797	7.0653	1.6e-12	2.32e-08	1.4935	0	0	0	0	4.52441	136.596	29.125	35.6726	83.3425	36.357	24.6491
2	ENSG00000181847	TIGIT	17.96	-2.67929	0.504427	-5.31156	1.09e-07	0.000525222	35.0971	16.5404	72.3441	18.2844	28.3002	15.0814	3.82088	5.94387	3.45218	6.41097	3.02975	7.21436
3	ENSG00000105374	NKG7	206.988	-2.77438	0.517192	-5.36431	8.13e-08	0.000525222	645.937	132.323	754.266	315.407	160.043	156.846	21.0148	36.2576	35.6726	96.1645	34.3371	95.5903
4	ENSG00000113088	GZMK	112.31	-2.98228	0.577389	-5.16512	2.4e-07	0.000870838	389.056	48.3489	352.913	212.557	145.404	46.7522	6.68654	14.8597	20.1377	42.7398	17.1686	51.1017
5	ENSG00000172543	CTSW	70.3305	-2.77636	0.545935	-5.08552	3.67e-07	0.001063	187.434	62.3446	240.937	169.131	59.528	15.0814	10.5074	12.4821	14.9595	34.1918	12.119	25.2503
6	ENSG00000182240	BACE2	110.481	2.07203	0.41233	5.02517	5.03e-07	0.00121528	58.2463	35.6255	50.9554	9.14222	31.2278	66.3579	254.089	207.441	166.28	260.713	66.6544	119.037
7	ENSG00000163508	EOMES	27.1871	-3.06773	0.645116	-4.75531	1.98e-06	0.00353726	73.1813	10.1787	91.2164	73.1378	36.1072	6.03254	2.86566	3.56632	2.87682	12.8219	4.03966	10.2203
8	ENSG00000145284	SCD5	31.849	2.63849	0.554225	4.76068	1.93e-06	0.00353726	8.96097	12.7234	11.3234	4.57111	6.83108	7.54068	16.2387	10.1046	58.6871	47.0137	102.001	96.1915
9	ENSG00000277734	TRAC	173.746	-2.57223	0.543295	-4.7345	2.2e-06	0.00353726	444.315	87.7913	770.622	230.841	175.656	73.8986	19.1044	45.1734	47.7552	83.3425	31.3074	75.1496
10	ENSG00000204252	HLA-DOA	218.699	-2.07048	0.443794	-4.66542	3.08e-06	0.00405899	409.965	268.463	688.212	196.558	240.064	313.692	14.3283	69.5433	119.676	141.041	91.9023	70.9412
11	ENSG00000077984	CST7	116.723	-3.02394	0.646456	-4.67773	2.9e-06	0.00405899	380.095	43.2595	482.503	175.988	110.273	52.7847	7.64176	17.2372	8.63046	59.8357	13.1289	49.2982
12	ENSG00000115009	CCL20	86.3574	4.15377	0.895726	4.63732	3.53e-06	0.00406695	1.4935	27.9914	5.03263	4.57111	8.78282	7.54068	0.95522	430.931	392.398	64.1097	63.6247	28.8575
13	ENSG00000153563	CD8A	108.315	-2.91692	0.629931	-4.63055	3.65e-06	0.00406695	270.323	63.6169	464.889	271.981	33.1795	43.7359	17.194	21.3979	22.4392	32.0548	6.05949	52.9053
14	ENSG00000084674	APOB	334.991	6.20956	1.38846	4.47227	7.74e-06	0.00801421	23.1492	3.81702	14.4688	0	6.83108	4.52441	52.5371	1671.42	20.7131	2192.55	29.2875	0.601197
15	ENSG00000010030	ETV7	33.1086	-1.62554	0.364994	-4.4536	8.44e-06	0.00816106	70.941	26.7191	57.2462	38.8545	56.6004	49.7685	7.64176	10.699	28.7682	17.0959	13.1289	19.8395
16	ENSG00000101082	SLA2	10.9574	-2.32143	0.526408	-4.40994	1.03e-05	0.00936877	24.6427	11.451	31.4539	9.14222	11.7104	18.0976	3.82088	3.56632	2.30146	10.6849	1.00992	3.60718
17	ENSG00000145649	GZMA	73.6305	-2.19437	0.502607	-4.36597	1.27e-05	0.0101928	191.167	39.4425	228.356	150.847	85.8765	28.6546	17.194	24.9643	20.7131	36.3288	13.1289	46.8934
18	ENSG00000089692	LAG3	54.3606	-3.1803	0.727507	-4.3715	1.23e-05	0.0101928	185.193	17.8127	226.468	95.9933	29.2761	31.6708	3.82088	4.7551	2.87682	21.3699	3.02975	30.0598
19	ENSG00000211772	TRBC2	201.667	-2.23023	0.516811	-4.31538	1.59e-05	0.012093	366.653	91.6084	775.654	351.976	247.871	156.846	25.7909	49.3341	50.632	175.233	45.4462	82.9652
20	ENSG00000078596	ITM2A	65.4782	-1.61694	0.375829	-4.30233	1.69e-05	0.012093	114.252	109.421	130.848	68.5667	117.104	51.2766	42.9849	25.5586	19.5624	36.3288	12.119	57.7149
21	ENSG00000100385	IL2RB	26.8464	-1.97226	0.459264	-4.29439	1.75e-05	0.012093	70.941	21.6298	74.2313	34.2833	38.0589	18.0976	11.4626	16.6428	13.8087	8.54795	3.02975	11.4227
22	ENSG00000161405	IKZF3	44.193	-1.88234	0.440089	-4.27717	1.89e-05	0.0124728	94.0902	36.8978	116.38	93.7078	43.9141	28.6546	11.4626	11.2934	15.5348	40.6028	13.1289	24.6491
23	ENSG00000049249	TNFRSF9	15.6581	-2.6865	0.631107	-4.2568	2.07e-05	0.012526	43.3114	6.36169	51.5845	34.2833	18.5415	9.04881	2.86566	4.16071	8.0551	4.27398	0	5.41077
24	ENSG00000163564	PYHIN1	10.7738	-2.73981	0.64238	-4.26509	2e-05	0.012526	25.3894	7.63403	35.2284	29.7122	8.78282	6.03254	2.86566	0.594387	2.87682	2.13699	2.01983	6.01197
25	ENSG00000027869	SH2D2A	19.26	-2.01246	0.481344	-4.18093	2.9e-05	0.0163118	44.0581	16.5404	45.9228	45.7111	19.5174	12.0651	2.86566	11.8877	4.02755	12.8219	9.08924	6.61317
26	ENSG00000275302	CCL4	66.2301	-2.00128	0.478868	-4.17919	2.93e-05	0.0163118	146.363	78.885	233.388	86.8511	60.5039	30.1627	18.1492	36.2576	11.5073	21.3699	23.2281	48.0958
27	ENSG00000172116	CD8B	40.61	-3.17047	0.761337	-4.16434	3.12e-05	0.0166777	118.733	34.3531	198.16	66.2811	4.87935	15.0814	3.82088	3.56632	6.90437	17.0959	1.00992	17.4347
28	ENSG00000188389	PDCD1	12.9496	-3.34661	0.806565	-4.14921	3.34e-05	0.0166777	50.7789	2.54468	34.5993	43.4256	8.78282	1.50814	2.86566	1.78316	1.15073	2.13699	1.00992	4.80958
29	ENSG00000148600	CDHR1	99.7825	-5.80141	1.3963	-4.15484	3.26e-05	0.0166777	381.588	76.3403	21.3887	22.8556	0	674.136	12.4179	5.34948	0.575364	2.13699	0	0.601197
30	ENSG00000160654	CD3G	31.3376	-2.27509	0.55053	-4.13255	3.59e-05	0.0170681	76.915	19.0851	103.169	59.4245	28.3002	24.1302	1.91044	9.5102	13.2334	17.0959	4.03966	19.2383
31	ENSG00000260260	SNHG19	39.5237	1.43458	0.347475	4.1286	3.65e-05	0.0170681	14.935	36.8978	20.1305	13.7133	15.6139	27.1464	35.3431	37.4464	55.8103	59.8357	63.6247	93.7867
32	ENSG00000005844	ITGAL	77.7466	-1.82228	0.444264	-4.10179	4.1e-05	0.0185728	247.174	44.5318	153.495	148.561	76.1178	54.2929	17.194	23.1811	28.7682	61.9727	40.3966	37.2742
33	ENSG00000197471	SPN	43.9438	-2.12045	0.519149	-4.08448	4.42e-05	0.0194066	103.051	21.6298	137.139	77.7089	73.1902	15.0814	8.59698	10.1046	19.5624	23.5069	10.0992	27.6551
34	ENSG00000143851	PTPN7	24.5491	-1.96175	0.486474	-4.0326	5.52e-05	0.0234867	65.7138	10.1787	65.4242	38.8545	33.1795	19.6058	5.73132	11.8877	12.658	17.0959	4.03966	10.2203
35	ENSG00000137825	ITPKA	16.6898	4.70437	1.16846	4.02612	5.67e-05	0.0234867	0	2.54468	1.88724	0	0	3.01627	45.8506	120.661	1.72609	21.3699	2.01983	1.20239
36	ENSG00000204257	HLA-DMA	377.065	-1.17457	0.294056	-3.99438	6.49e-05	0.0256679	616.067	386.791	773.767	363.403	546.487	444.9	118.447	150.974	268.695	299.178	328.222	227.854
37	ENSG00000202538	RNU4-2	9.53515	-2.67806	0.670852	-3.99203	6.55e-05	0.0256679	9.70772	10.1787	47.1809	15.9989	7.80695	7.54068	2.86566	1.78316	2.87682	4.27398	0	4.20838
38	ENSG00000241839	PLEKHO2	89.4513	-1.04277	0.262387	-3.97416	7.06e-05	0.0269448	135.908	76.3403	157.899	123.42	133.694	90.4881	43.9401	55.8724	58.1118	94.0275	39.3867	64.3281
39	ENSG00000117834	SLC5A9	44.9149	1.74036	0.440566	3.95028	7.81e-05	0.0290161	17.9219	25.4468	18.8724	22.8556	13.6622	25.6383	27.7014	83.2142	18.987	102.575	120.18	61.9233
40	ENSG00000135362	PRR5L	27.5179	-1.69707	0.432311	-3.92556	8.65e-05	0.0305945	73.1813	26.7191	69.8278	31.9978	29.2761	18.0976	11.4626	13.0765	6.32901	23.5069	11.1091	15.6311
41	ENSG00000140853	NLRC5	34.1161	-1.33784	0.340472	-3.92938	8.52e-05	0.0305945	68.7008	26.7191	74.2313	41.14	40.0106	42.2278	16.2387	12.4821	18.987	14.9589	24.238	29.4587
42	ENSG00000167286	CD3D	92.9653	-2.31534	0.590855	-3.91862	8.91e-05	0.0307395	322.595	52.1659	340.961	82.28	82.9489	45.2441	7.64176	25.5586	20.7131	68.3836	20.1983	46.8934
43	ENSG00000132855	ANGPTL3	13.2275	-4.11109	1.05261	-3.90561	9.4e-05	0.0316872	2.24024	111.966	18.8724	4.57111	10.7346	1.50814	0	0	2.87682	2.13699	2.01983	1.80359
44	ENSG00000182866	LCK	37.9508	-1.98311	0.509172	-3.89478	9.83e-05	0.0322171	101.558	24.1744	109.46	61.71	41.9624	22.622	4.7761	9.5102	12.0826	27.7808	12.119	27.6551
45	ENSG00000177822	TENM3-AS1	3.0915	4.92537	1.26983	3.87877	0.000104985	0.0322171	0	0	0	0	0	0	0	8.91581	6.90437	2.13699	13.1289	6.01197
46	ENSG00000186810	CXCR3	24.5926	-2.31502	0.597892	-3.87197	0.00010796	0.0322171	66.4606	10.1787	85.5547	36.5689	38.0589	7.54068	6.68654	4.7551	11.5073	14.9589	2.01983	10.8215
47	ENSG00000188706	ZDHHC9	146.434	1.00014	0.258118	3.87474	0.000106736	0.0322171	74.6748	113.238	71.715	143.99	126.863	58.8173	180.537	169.995	262.366	217.973	149.467	187.573
48	ENSG00000013588	GPRC5A	13.6153	4.32432	1.11743	3.86987	0.000108894	0.0322171	0.746748	2.54468	0.629079	0	0.975869	3.01627	10.5074	113.528	1.15073	25.6439	4.03966	0.601197
49	ENSG00000179583	CIITA	41.6593	-1.53151	0.394997	-3.87726	0.00010564	0.0322171	103.051	33.0808	103.798	54.8533	37.083	39.2115	8.59698	25.5586	27.0421	21.3699	22.2181	24.0479
50	ENSG00000079263	SP140	8.71755	-2.19084	0.569714	-3.84551	0.0001203	0.0335383	27.6297	6.36169	14.4688	18.2844	10.7346	7.54068	0.95522	2.37755	4.02755	6.41097	1.00992	4.80958
51	ENSG00000149781	FERMT3	51.0697	-1.32253	0.343312	-3.85226	0.000117032	0.0335383	114.252	33.0808	105.056	75.4233	50.7452	55.801	19.1044	25.5586	26.4667	47.0137	27.2677	33.0658
52	ENSG00000186818	LILRB4	42.2983	-1.25219	0.325471	-3.84731	0.000119421	0.0335383	76.915	31.8085	83.6675	41.14	79.0454	45.2441	16.2387	27.9362	24.7407	17.0959	28.2776	35.4706
53	ENSG00000162654	GBP4	246.694	-1.656	0.434518	-3.81111	0.000138344	0.0374618	535.418	202.302	423.999	511.965	412.793	158.354	60.1789	61.8163	79.9756	211.562	71.704	230.258
54	ENSG00000160185	UBASH3A	7.54922	-2.36701	0.621429	-3.80898	0.000139542	0.0374618	14.1882	3.81702	20.7596	20.57	10.7346	6.03254	0	2.37755	1.72609	2.13699	4.03966	4.20838
55	ENSG00000154451	GBP5	44.1336	-2.34545	0.618707	-3.79089	0.000150108	0.0395658	171.005	13.9957	116.38	68.5667	56.6004	15.0814	8.59698	8.32142	6.32901	21.3699	9.08924	34.2682
56	ENSG00000026751	SLAMF7	45.622	-2.09622	0.55512	-3.77617	0.000159261	0.0405054	196.395	21.6298	93.7327	47.9967	51.7211	31.6708	14.3283	11.8877	7.47973	19.2329	11.1091	40.2802
57	ENSG00000167608	TMC4	18.9866	3.45976	0.915224	3.78023	0.000156681	0.0405054	2.98699	1.27234	3.14539	2.28556	1.95174	7.54068	136.596	2.37755	14.9595	6.41097	2.01983	46.2922
58	ENSG00000151062	CACNA2D4	42.8965	2.82632	0.755555	3.74072	0.000183494	0.0450866	10.4545	16.5404	8.17802	6.85667	16.5898	4.52441	41.0745	274.013	8.63046	102.575	9.08924	16.2323
59	ENSG00000133477	FAM83F	5.4388	-5.58268	1.49143	-3.74318	0.000181705	0.0450866	0	3.81702	8.8071	0	4.87935	46.7522	0	0	0	0	1.00992	0
60	ENSG00000271503	CCL5	365.298	-2.08242	0.5579	-3.73261	0.000189505	0.0457875	854.279	178.127	1387.12	637.67	278.123	206.615	54.4475	67.1658	99.538	367.562	105.031	147.894
61	ENSG00000270722	RNVU1-31	10.232	-2.23174	0.600446	-3.71681	0.000201753	0.0464676	20.1622	10.1787	33.9703	18.2844	9.75869	7.54068	2.86566	1.78316	0.575364	6.41097	4.03966	7.21436
62	ENSG00000163884	KLF15	19.2014	1.71357	0.460323	3.72254	0.000197226	0.0464676	14.935	3.81702	4.40355	9.14222	10.7346	10.5569	40.1192	27.9362	43.1523	34.1918	21.2082	10.2203
63	ENSG00000147138	GPR174	10.9589	-2.34186	0.63011	-3.71658	0.000201935	0.0464676	24.6427	13.9957	37.7447	13.7133	14.638	4.52441	0	4.16071	3.45218	6.41097	1.00992	7.21436
64	ENSG00000232453	LINC02777	20.1634	3.45274	0.930659	3.70999	0.000207267	0.0469492	1.4935	2.54468	4.40355	4.57111	5.85521	1.50814	73.5519	130.765	4.02755	6.41097	2.01983	4.80958
65	ENSG00000133106	EPSTI1	45.1303	-1.26352	0.341674	-3.69803	0.000217277	0.0477253	63.4736	47.0765	103.798	59.4245	61.4797	45.2441	33.4327	17.2372	16.6856	32.0548	17.1686	44.4886
66	ENSG00000276649		12.9115	2.22267	0.600425	3.70183	0.000214048	0.0477253	2.98699	6.36169	6.91987	2.28556	3.90348	4.52441	45.8506	29.7194	10.3566	2.13699	27.2677	12.6251
67	ENSG00000140749	IGSF6	66.5212	-1.1424	0.309435	-3.6919	0.000222588	0.0481621	117.239	38.1702	115.751	59.4245	128.815	88.98	45.8506	40.4183	39.1248	38.4658	31.3074	54.7089
68	ENSG00000066294	CD84	29.9599	-1.53278	0.416798	-3.67751	0.000235519	0.0502105	64.9671	16.5404	82.4093	38.8545	43.9141	21.1139	17.194	16.6428	18.987	8.54795	11.1091	19.2383
69	ENSG00000240065	PSMB9	352.369	-1.37362	0.37459	-3.66699	0.000245422	0.0505045	684.021	360.072	587.56	630.813	560.149	229.237	63.0445	138.492	227.844	168.822	258.538	319.837
70	ENSG00000146678	IGFBP1	428.858	8.62058	2.34858	3.67055	0.000242031	0.0505045	8.96097	2.54468	1.25816	0	0	0	4.7761	3565.73	0	1560	3.02975	0
71	ENSG00000166145	SPINT1	216.369	0.991246	0.270728	3.66141	0.000250833	0.0505045	117.239	162.859	177.4	132.562	105.394	173.436	182.447	230.028	418.865	286.356	412.045	197.794
72	ENSG00000101445	PPP1R16B	19.9815	-1.31432	0.358752	-3.66359	0.000248709	0.0505045	35.0971	26.7191	45.9228	22.8556	21.4691	16.5895	12.4179	12.4821	6.32901	14.9589	11.1091	13.8275
73	ENSG00000019582	CD74	18563.3	-1.1371	0.312413	-3.63974	0.000272911	0.0527519	36323.3	12913	35547.4	28553.4	20683.5	19108.1	7890.12	7613.51	11911.8	19837.7	10776.8	11601.3
74	ENSG00000176919	C8G	12.5145	3.76154	1.03298	3.64146	0.000271098	0.0527519	2.98699	2.54468	3.77447	0	0	0	0.95522	57.6556	39.7001	36.3288	2.01983	4.20838
75	ENSG00000168404	MLKL	41.2496	-0.829135	0.227641	-3.64229	0.000270227	0.0527519	35.8439	58.5276	59.1334	59.4245	45.8658	57.3091	32.4775	27.3418	25.316	34.1918	31.3074	28.2563
76	ENSG00000163606	CD200R1	11.7051	-2.38137	0.65554	-3.63268	0.000280492	0.0535038	18.6687	6.36169	42.1483	29.7122	11.7104	9.04881	0	2.97194	4.60291	6.41097	1.00992	7.81556
77	ENSG00000027075	PRKCH	60.9331	-1.22597	0.338968	-3.61678	0.000298287	0.0561593	97.0772	80.1573	127.703	98.2789	70.2626	34.6871	23.8805	30.3137	23.5899	61.9727	39.3867	43.8874
78	ENSG00000185022	MAFF	25.633	1.30515	0.361699	3.60839	0.000308105	0.0572641	14.1882	20.3574	13.2107	9.14222	13.6622	18.0976	45.8506	64.7882	27.0421	29.9178	30.2975	21.0419
79	ENSG00000179144	GIMAP7	58.6622	-1.1125	0.310079	-3.5878	0.000333477	0.0611952	76.1683	96.6977	96.8781	73.1378	98.5628	39.2115	38.2088	40.4183	35.6726	42.7398	15.1487	51.1017
80	ENSG00000110934	BIN2	34.2222	-1.33158	0.374897	-3.55186	0.000382523	0.0693179	78.4085	34.3531	65.4242	43.4256	39.0348	30.1627	5.73132	20.2092	18.987	32.0548	24.238	18.6371
81	ENSG00000253304	TMEM200B	34.5295	1.23602	0.348974	3.54186	0.000397324	0.0711111	16.4285	33.0808	18.2433	15.9989	18.5415	22.622	57.3132	78.4591	61.564	29.9178	33.3272	28.8575
82	ENSG00000180644	PRF1	56.5212	-1.8755	0.530766	-3.53358	0.000409973	0.0724803	95.5837	50.8935	231.501	79.9945	54.6487	18.0976	7.64176	23.7755	18.987	44.8768	19.1884	33.0658
83	ENSG00000198821	CD247	24.7627	-1.74334	0.494468	-3.52569	0.000422388	0.0731602	47.0451	7.63403	79.893	31.9978	38.0589	21.1139	6.68654	7.72703	10.3566	23.5069	11.1091	12.0239
84	ENSG00000133135	RNF128	175.588	1.09521	0.310722	3.52473	0.000423913	0.0731602	119.48	141.23	121.412	61.71	131.742	91.9962	334.327	300.76	146.142	303.452	242.38	112.424
85	ENSG00000137078	SIT1	13.5428	-2.03565	0.578765	-3.51722	0.000436086	0.0743757	29.1232	6.36169	49.6972	22.8556	15.6139	6.03254	1.91044	4.16071	5.75364	8.54795	4.03966	8.41676
86	ENSG00000183918	SH2D1A	15.0318	-1.87611	0.534195	-3.51203	0.000444706	0.074964	29.1232	12.7234	52.8426	22.8556	16.5898	7.54068	2.86566	7.72703	4.02755	6.41097	5.04958	12.6251
87	ENSG00000135426	TESPA1	7.91636	-1.94643	0.558127	-3.48742	0.000487697	0.081266	11.948	3.81702	17.6142	25.1411	10.7346	6.03254	0.95522	2.97194	3.45218	4.27398	5.04958	3.00598
88	ENSG00000229754	CXCR2P1	12.5115	-3.80931	1.09968	-3.46402	0.000532167	0.0829551	58.2463	0	45.9228	25.1411	6.83108	4.52441	2.86566	0.594387	0	0	0	6.01197
89	ENSG00000160791	CCR5	44.7241	-1.88718	0.543507	-3.47223	0.000516161	0.0829551	95.5837	29.2638	140.285	79.9945	48.7935	25.6383	2.86566	13.6709	15.5348	44.8768	13.1289	27.0539
90	ENSG00000180543	TSPYL5	25.7937	1.72138	0.495938	3.47096	0.0005186	0.0829551	19.4154	10.1787	14.4688	9.14222	11.7104	6.03254	57.3132	41.6071	75.9481	27.7808	7.06941	28.8575
91	ENSG00000110446	SLC15A3	141.655	-0.935175	0.269704	-3.46741	0.000525491	0.0829551	250.907	90.336	262.955	141.704	212.739	153.83	93.6116	76.6759	113.347	113.26	91.9023	98.5963
92	ENSG00000286733	LINC02348	93.5276	1.81756	0.524614	3.46456	0.000531103	0.0829551	13.4415	55.9829	15.727	43.4256	92.7076	27.1464	33.4327	189.61	212.885	235.069	115.13	87.7748
93	ENSG00000089012	SIRPG	14.7591	-2.28883	0.65946	-3.47077	0.000518976	0.0829551	39.5776	8.90637	47.1809	27.4267	15.6139	6.03254	0.95522	4.7551	2.87682	14.9589	1.00992	7.81556
94	ENSG00000166796	LDHC	3.17614	3.81919	1.10391	3.4597	0.000540777	0.0834004	0.746748	0	0	0	0.975869	0	1.91044	8.32142	1.72609	14.9589	7.06941	2.40479
95	ENSG00000227507	LTB	28.4636	-1.38663	0.401305	-3.45531	0.000549661	0.0838782	56.0061	21.6298	69.1987	29.7122	38.0589	31.6708	4.7761	14.8597	15.5348	17.0959	17.1686	25.8515
96	ENSG00000012504	NR1H4	91.3892	1.41493	0.409851	3.4523	0.000555823	0.0839351	35.0971	62.3446	44.6646	52.5678	47.8176	58.8173	205.372	271.041	111.045	36.3288	80.7932	90.7807
97	ENSG00000130203	APOE	242.435	-1.4808	0.430029	-3.44349	0.000574254	0.0858243	510.029	120.872	836.675	141.704	299.592	232.253	170.029	124.821	121.402	91.8905	106.041	153.906
98	ENSG00000105996	HOXA2	5.40077	-3.07644	0.897359	-3.42832	0.000607322	0.0863172	1.4935	1.27234	5.03263	18.2844	17.5656	15.0814	1.91044	1.18877	0.575364	0	0	2.40479
99	ENSG00000044446	PHKA2	160.4	0.571177	0.166553	3.4294	0.000604924	0.0863172	123.213	114.51	108.831	146.276	146.38	138.748	180.537	228.245	213.46	192.329	180.775	151.502
100	ENSG00000198846	TOX	17.9846	-2.40687	0.701721	-3.42995	0.000603684	0.0863172	51.5256	1.27234	71.0859	31.9978	17.5656	7.54068	5.73132	8.32142	4.60291	8.54795	1.00992	6.61317
101	ENSG00000140030	GPR65	31.8512	-1.60952	0.46874	-3.43371	0.000595389	0.0863172	60.4866	26.7191	74.8604	59.4245	54.6487	13.5732	6.68654	26.153	18.987	8.54795	8.07932	24.0479
102	ENSG00000167208	SNX20	34.4212	-1.64923	0.479971	-3.43611	0.000590133	0.0863172	103.051	25.4468	78.0058	47.9967	37.083	19.6058	7.64176	13.0765	20.7131	29.9178	7.06941	23.4467
103	ENSG00000115041	KCNIP3	13.8876	2.21587	0.6472	3.42378	0.000617575	0.0869222	5.22723	2.54468	5.03263	4.57111	4.87935	7.54068	21.0148	58.2499	31.645	17.0959	4.03966	4.80958
104	ENSG00000196878	LAMB3	35.0365	2.65362	0.776928	3.41553	0.000636587	0.0871355	16.4285	13.9957	10.0653	6.85667	5.85521	3.01627	65.9102	17.2372	8.63046	247.891	13.1289	11.4227
105	ENSG00000115956	PLEK	55.533	-1.44515	0.423512	-3.4123	0.000644172	0.0871355	127.694	21.6298	117.638	89.1367	93.6834	37.7034	19.1044	29.7194	35.0972	29.9178	18.1785	46.8934
106	ENSG00000138670	RASGEF1B	21.426	-1.14247	0.334631	-3.4141	0.00063992	0.0871355	20.1622	22.9021	44.6646	36.5689	26.3485	27.1464	13.3731	16.6428	8.0551	10.6849	13.1289	17.4347
107	ENSG00000231389	HLA-DPA1	2451.17	-1.30267	0.382035	-3.40981	0.000650082	0.0871355	5360.9	1489.91	5266.02	3314.06	3650.73	1845.96	599.878	1337.97	1783.05	2017.32	885.696	1862.51
108	ENSG00000182162	P2RY8	23.5962	-1.05398	0.308614	-3.4152	0.000637359	0.0871355	33.6037	33.0808	35.8575	27.4267	28.3002	30.1627	9.5522	11.2934	10.3566	23.5069	17.1686	22.8455
109	ENSG00000169100	SLC25A6	896.39	0.933	0.273793	3.40769	0.000655154	0.0871355	798.273	650.165	571.204	587.388	558.197	532.372	1946.74	1085.35	682.382	660.329	1372.47	1311.81
110	ENSG00000004468	CD38	15.2055	-2.34051	0.687384	-3.40496	0.000661736	0.0872108	66.4606	3.81702	36.4866	22.8556	20.4932	3.01627	2.86566	4.7551	6.32901	2.13699	3.02975	10.2203
111	ENSG00000007237	GAS7	24.8577	-1.59605	0.470465	-3.3925	0.00069257	0.0904522	59.7398	8.90637	62.9079	43.4256	27.3243	19.6058	8.59698	7.13265	10.9319	21.3699	12.119	16.2323
112	ENSG00000242574	HLA-DMB	183.61	-1.32671	0.391925	-3.3851	0.000711524	0.0920979	336.783	142.502	510.183	153.132	291.785	137.24	43.9401	96.2907	102.415	166.685	91.9023	130.46
113	ENSG00000111728	ST8SIA1	5.52196	-2.7527	0.81566	-3.37481	0.000738658	0.094764	14.935	0	16.9851	13.7133	7.80695	3.01627	0.95522	1.18877	0.575364	4.27398	1.00992	1.80359
114	ENSG00000006740	ARHGAP44	18.7174	3.56275	1.05705	3.37047	0.000750413	0.0954275	2.98699	1.27234	0.629079	2.28556	5.85521	4.52441	111.761	39.8239	0.575364	51.2877	0	3.60718
115	ENSG00000117560	FASLG	14.0345	-2.15668	0.640479	-3.36729	0.000759105	0.0956935	38.8309	10.1787	57.2462	9.14222	12.6863	7.54068	4.7761	2.37755	2.30146	10.6849	3.02975	9.61915
116	ENSG00000210151	MT-TS1	4.19877	-3.1101	0.92518	-3.36162	0.000774875	0.0968394	2.98699	2.54468	21.3887	4.57111	1.95174	12.0651	1.91044	1.18877	0.575364	0	0	1.20239
117	ENSG00000168389	MFSD2A	16.1331	2.5617	0.763081	3.35704	0.00078781	0.0972722	7.46748	2.54468	6.91987	2.28556	4.87935	3.01627	11.4626	82.0254	5.17828	10.6849	53.5255	3.60718
118	ENSG00000076003	MCM6	44.7748	-0.919435	0.274005	-3.35554	0.000792111	0.0972722	85.876	49.6212	57.8753	59.4245	32.2037	66.3579	41.0745	29.125	25.8914	25.6439	35.347	28.8575
119	ENSG00000229743	LINC01159	15.004	2.34328	0.699547	3.34971	0.000808975	0.0972722	3.73374	8.90637	3.14539	9.14222	1.95174	4.52441	13.3731	79.6479	29.3436	2.13699	12.119	12.0239
120	ENSG00000173762	CD7	45.4964	-1.44	0.429969	-3.34908	0.000810801	0.0972722	101.558	22.9021	89.9583	66.2811	57.5763	55.801	13.3731	21.3979	10.9319	57.6987	23.2281	25.2503
121	ENSG00000105427	CNFN	17.3859	2.37677	0.709756	3.34871	0.000811888	0.0972722	3.73374	3.81702	1.25816	6.85667	5.85521	13.5732	52.5371	68.9489	18.4117	17.0959	14.1388	2.40479
122	ENSG00000009790	TRAF3IP3	17.5609	-1.74634	0.524085	-3.33216	0.000861737	0.098367	47.0451	6.36169	48.4391	25.1411	20.4932	15.0814	1.91044	10.1046	8.63046	6.41097	9.08924	12.0239
123	ENSG00000117228	GBP1	127.907	-1.53169	0.459553	-3.333	0.000859142	0.098367	374.121	99.2424	203.192	182.844	223.474	58.8173	34.3879	52.9005	65.0161	42.7398	45.4462	152.704
124	ENSG00000225826	LINC00626	4.01275	4.237	1.27008	3.336	0.000849921	0.098367	0.746748	0	0	2.28556	0	0	9.5522	16.0485	1.15073	2.13699	0	16.2323
125	ENSG00000124875	CXCL6	5.18713	4.65561	1.39354	3.34086	0.000835205	0.098367	1.4935	0	0	0	0	0	0.95522	27.9362	17.8363	12.8219	0	1.20239
126	ENSG00000104219	ZDHHC2	22.8763	-1.07791	0.323377	-3.3333	0.000858215	0.098367	34.3504	25.4468	39.0029	29.7122	19.5174	34.6871	9.5522	17.8316	12.0826	27.7808	13.1289	11.4227
127	ENSG00000148702	HABP2	128.886	6.31132	1.89094	3.33766	0.000844866	0.098367	13.4415	1.27234	0	2.28556	1.95174	0	260.775	0	0.575364	1258.69	4.03966	3.60718
128	ENSG00000196743	GM2A	219.626	-0.727081	0.219443	-3.3133	0.000922008	0.102818	343.504	207.391	351.026	189.701	260.557	286.546	214.924	139.681	132.909	173.096	141.388	194.788
129	ENSG00000254827	SLC22A18AS	36.2753	1.83414	0.553273	3.31506	0.00091622	0.102818	2.24024	29.2638	11.3234	15.9989	20.4932	16.5895	59.2236	46.9566	52.9335	76.9316	94.932	8.41676
130	ENSG00000015413	DPEP1	42.3453	-5.06967	1.5283	-3.3172	0.000909232	0.102818	0	265.919	1.25816	6.85667	112.225	107.078	0	8.32142	0	4.27398	1.00992	1.20239
131	ENSG00000286039		3.67325	4.62264	1.39915	3.30389	0.000953532	0.104533	0	0	0	0	0.975869	0	25.7909	5.34948	0	8.54795	1.00992	2.40479
132	ENSG00000241106	HLA-DOB	15.5722	-1.78238	0.540034	-3.3005	0.00096513	0.104533	29.1232	12.7234	37.7447	36.5689	22.445	6.03254	1.91044	6.53826	12.658	10.6849	2.01983	8.41676
133	ENSG00000236751	LINC01186	8.39705	2.39623	0.725856	3.30124	0.000962572	0.104533	2.24024	3.81702	2.51632	2.28556	4.87935	0	44.8953	12.4821	6.32901	6.41097	10.0992	4.80958
134	ENSG00000258586	LINC02274	64.1859	1.74709	0.529729	3.29809	0.000973437	0.104533	20.1622	64.8893	7.54895	20.57	26.3485	37.7034	133.731	68.3545	60.9886	115.397	192.894	21.6431
135	ENSG00000100336	APOL4	18.3089	-2.21398	0.671151	-3.29878	0.000971064	0.104533	79.902	10.1787	29.5667	13.7133	26.3485	16.5895	3.82088	1.78316	2.30146	25.6439	5.04958	4.80958
136	ENSG00000109943	CRTAM	8.65212	-2.01188	0.61059	-3.29499	0.000984267	0.104918	17.1752	3.81702	25.7922	20.57	9.75869	6.03254	1.91044	1.78316	2.87682	4.27398	2.01983	7.81556
137	ENSG00000120875	DUSP4	19.9809	-1.55635	0.472744	-3.29216	0.000994215	0.105205	46.2984	19.0851	40.8901	41.14	18.5415	10.5569	5.73132	14.2653	4.60291	21.3699	7.06941	10.2203
138	ENSG00000175463	TBC1D10C	19.7206	-1.62295	0.493911	-3.28592	0.00101649	0.105834	47.7919	13.9957	61.6497	18.2844	14.638	19.6058	4.7761	8.32142	8.0551	19.2329	7.06941	13.2263
139	ENSG00000093072	ADA2	227.661	-1.39999	0.426256	-3.28438	0.00102205	0.105834	654.151	99.2424	457.969	249.126	360.096	156.846	119.402	83.8086	88.6061	213.699	87.8626	161.121
140	ENSG00000183421	RIPK4	120.535	0.902068	0.274536	3.28579	0.00101695	0.105834	63.4736	61.0722	64.166	79.9945	128.815	105.569	129.91	191.393	144.416	230.795	143.408	103.406
141	ENSG00000197982	C1orf122	89.8422	0.83679	0.255332	3.27726	0.0010482	0.107427	64.9671	69.9786	79.2639	68.5667	55.6245	48.2603	94.5668	102.235	162.828	98.3015	159.567	73.9472
142	ENSG00000135069	PSAT1	21.724	2.9207	0.89204	3.27418	0.00105967	0.107427	5.97398	3.81702	5.66171	6.85667	0.975869	7.54068	82.1489	116.5	6.32901	19.2329	5.04958	0.601197
143	ENSG00000102897	LYRM1	149.336	1.06995	0.32662	3.27582	0.00105357	0.107427	114.252	151.408	66.0533	91.4222	69.2867	84.4556	185.313	232.405	111.621	297.041	281.766	107.013
144	ENSG00000152207	CYSLTR2	6.34672	-3.13095	0.959034	-3.26469	0.00109584	0.110322	2.98699	1.27234	38.3738	20.57	3.90348	1.50814	0.95522	1.78316	0.575364	0	3.02975	1.20239
145	ENSG00000143119	CD53	121.624	-1.18008	0.361882	-3.26094	0.00111042	0.111019	262.108	71.2509	243.454	166.846	196.15	72.3905	52.5371	81.431	83.4278	74.7946	50.4958	104.608
146	ENSG00000269976		9.1734	2.59501	0.796441	3.25826	0.001121	0.111144	1.4935	1.27234	1.88724	2.28556	5.85521	3.01627	11.4626	33.8801	8.63046	2.13699	36.357	1.80359
147	ENSG00000198851	CD3E	130.211	-1.84786	0.567732	-3.25481	0.00113467	0.111144	336.783	81.4297	364.237	226.27	124.911	84.4556	10.5074	35.0688	35.0972	173.096	38.3768	52.3041
148	ENSG00000151117	TMEM86A	17.9345	-1.28752	0.395431	-3.25598	0.00113001	0.111144	41.0711	12.7234	37.7447	25.1411	17.5656	16.5895	11.4626	8.91581	10.3566	14.9589	6.05949	12.6251
149	ENSG00000273102		20.884	3.02245	0.929573	3.25144	0.00114823	0.111717	2.98699	8.90637	5.03263	0	6.83108	3.01627	13.3731	65.977	73.0712	68.3836	3.02975	0
150	ENSG00000197182	MIRLET7BHG	6.40139	2.94418	0.907997	3.2425	0.00118486	0.114513	1.4935	0	1.25816	2.28556	0	4.52441	7.64176	30.3137	6.90437	10.6849	11.1091	0.601197
151	ENSG00000198355	PIM3	183.678	0.796737	0.246336	3.23435	0.0012192	0.117051	136.655	153.953	67.3114	159.989	130.766	161.37	200.596	254.992	322.204	226.521	178.755	211.02
152	ENSG00000280721	LINC01943	5.42442	-2.28059	0.705667	-3.23183	0.00123002	0.117313	17.9219	5.08935	9.43618	11.4278	1.95174	7.54068	0.95522	1.18877	2.30146	4.27398	0	3.00598
153	ENSG00000100092	SH3BP1	28.697	-1.31641	0.407789	-3.22816	0.00124591	0.118052	71.6878	19.0851	55.988	45.7111	23.4209	27.1464	9.5522	10.699	14.9595	25.6439	24.238	16.2323
154	ENSG00000204287	HLA-DRA	5069.74	-1.25528	0.389941	-3.21917	0.00128564	0.118431	10998.1	4056.21	11972	5051.08	7149.22	3645.16	1041.19	2430.45	2758.3	4904.39	3170.12	3660.69
155	ENSG00000261594	TPBGL	7.39172	-4.21213	1.3095	-3.21659	0.00129722	0.118431	58.9931	10.1787	0.629079	0	0	13.5732	0	0.594387	0.575364	2.13699	2.01983	0
156	ENSG00000136167	LCP1	350.343	-1.31277	0.407946	-3.21799	0.00129093	0.118431	1037.23	193.395	686.954	459.397	400.106	217.171	118.447	163.456	169.157	320.548	176.735	261.521
157	ENSG00000186469	GNG2	41.5745	-0.944903	0.293958	-3.21442	0.0013071	0.118431	58.2463	40.7148	72.3441	57.1389	60.5039	36.1952	14.3283	24.3699	24.7407	42.7398	30.2975	37.2742
158	ENSG00000277632	CCL3	37.4197	-1.69496	0.527113	-3.21555	0.00130196	0.118431	30.6167	94.153	110.089	34.2833	32.2037	37.7034	13.3731	14.2653	4.60291	47.0137	9.08924	21.6431
159	ENSG00000181896	ZNF101	19.7136	-1.24596	0.386591	-3.22294	0.0012688	0.118431	34.3504	21.6298	49.6972	25.1411	16.5898	16.5895	14.3283	7.72703	11.5073	17.0959	8.07932	13.8275
160	ENSG00000130173	ANGPTL8	5.8377	4.84537	1.50388	3.22191	0.00127337	0.118431	0	0	0.629079	0	0.975869	0	28.6566	28.5306	0.575364	10.6849	0	0
161	ENSG00000106366	SERPINE1	350.343	2.48196	0.773844	3.20732	0.00133979	0.120639	263.602	76.3403	117.638	66.2811	35.1313	78.423	398.327	2527.93	85.1539	318.411	205.013	31.8634
162	ENSG00000100600	LGMN	368.726	-1.02042	0.318717	-3.20165	0.00136643	0.122267	534.671	422.416	846.74	267.41	571.859	316.708	340.058	238.944	127.731	252.165	307.014	198.996
163	ENSG00000101076	HNF4A	221.401	1.22914	0.384118	3.1999	0.00137473	0.122267	149.35	117.055	100.653	134.848	146.38	144.781	277.014	408.938	336.588	611.179	124.22	105.811
164	ENSG00000112149	CD83	37.6607	-1.15542	0.362412	-3.18814	0.0014319	0.126574	49.2854	64.8893	51.5845	66.2811	56.6004	25.6383	16.2387	13.0765	24.1653	12.8219	26.2578	45.0898
165	ENSG00000147570	DNAJC5B	4.08832	-2.40359	0.755552	-3.18124	0.00146646	0.128844	8.21423	2.54468	6.29079	4.57111	16.5898	3.01627	2.86566	0.594387	1.15073	0	2.01983	1.20239
166	ENSG00000029363	BCLAF1	133.717	-0.517313	0.162814	-3.17734	0.00148635	0.129805	182.206	141.23	171.739	139.419	145.404	158.354	119.402	93.3188	115.073	126.082	122.2	90.1795
167	ENSG00000127084	FGD3	22.7622	-1.25952	0.397507	-3.16855	0.001532	0.132666	45.5516	17.8127	57.2462	25.1411	28.3002	16.5895	6.68654	14.8597	14.3841	19.2329	11.1091	16.2323
168	ENSG00000140368	PSTPIP1	19.0849	-1.7464	0.551346	-3.16753	0.00153742	0.132666	54.5126	15.2681	56.6171	15.9989	17.5656	13.5732	1.91044	7.72703	9.20583	21.3699	5.04958	10.2203
169	ENSG00000115641	FHL2	157.828	2.34842	0.742171	3.16426	0.00155477	0.133313	88.863	50.8935	41.5192	11.4278	28.3002	88.98	233.074	665.119	19.5624	363.288	293.885	9.01795
170	ENSG00000163600	ICOS	3.49026	-2.63243	0.832352	-3.16263	0.00156349	0.133313	11.2012	1.27234	6.29079	9.14222	5.85521	3.01627	0.95522	0.594387	1.15073	0	0	2.40479
171	ENSG00000069974	RAB27A	52.0333	-1.14885	0.363449	-3.16096	0.0015725	0.133313	112.012	31.8085	123.299	68.5667	41.9624	51.2766	34.3879	34.4745	28.1928	36.3288	21.2082	40.8814
172	ENSG00000134330	IAH1	120.546	0.705364	0.224179	3.14644	0.00165273	0.138339	92.5967	106.876	67.9405	121.134	79.0454	87.4718	195.82	181.882	111.045	111.123	157.547	134.067
173	ENSG00000158050	DUSP2	20.0904	-1.43085	0.454947	-3.14508	0.00166041	0.138339	35.8439	17.8127	64.166	29.7122	14.638	12.0651	5.73132	10.699	11.5073	14.9589	13.1289	10.8215
174	ENSG00000125347	IRF1	165.568	-1.0746	0.341348	-3.14812	0.00164323	0.138339	368.147	134.868	289.376	228.556	207.86	120.651	70.6863	137.898	115.073	57.6987	88.8726	167.133
175	ENSG00000168333	PPDPFL	41.4341	5.57427	1.77713	3.13668	0.00170875	0.139954	0	0	8.17802	0	0	1.50814	160.477	219.923	40.2755	66.2466	0	0.601197
176	ENSG00000179841	AKAP5	7.63365	-2.09739	0.668625	-3.13687	0.00170764	0.139954	13.4415	6.36169	18.8724	11.4278	3.90348	18.0976	0	0.594387	2.30146	8.54795	5.04958	3.00598
177	ENSG00000214978	GSG1L2	44.6682	8.40178	2.67702	3.13848	0.00169827	0.139954	0.746748	0	0.629079	0	0	0	485.252	2.37755	0	47.0137	0	0
178	ENSG00000185090	MANEAL	11.218	1.97191	0.630729	3.12639	0.00176964	0.142527	5.97398	2.54468	1.88724	0	0.975869	16.5895	21.9701	11.8877	28.1928	8.54795	22.2181	13.8275
179	ENSG00000288784	CTAGE4	4.85493	2.82948	0.905031	3.12639	0.00176966	0.142527	0	1.27234	0	4.57111	2.92761	0	14.3283	8.91581	4.02755	2.13699	5.04958	15.0299
180	ENSG00000172216	CEBPB	290.373	1.85851	0.593917	3.12923	0.00175263	0.142527	291.232	83.9743	109.46	63.9956	99.5386	102.553	437.491	857.701	115.648	1062.08	189.864	70.9412
181	ENSG00000126562	WNK4	16.668	3.84715	1.23371	3.11836	0.00181861	0.14566	0.746748	5.08935	0.629079	0	1.95174	4.52441	0.95522	30.3137	2.87682	151.726	0	1.20239
182	ENSG00000011600	TYROBP	638.133	-1.1947	0.383459	-3.11559	0.00183574	0.146224	1430.77	357.527	1360.07	738.235	906.582	530.864	231.163	313.242	303.217	758.631	287.826	439.475
183	ENSG00000261801	LOXL1-AS1	4.29437	2.85866	0.918064	3.11379	0.001847	0.146317	1.4935	0	0.629079	0	0.975869	3.01627	18.1492	7.72703	7.47973	6.41097	5.04958	0.601197
184	ENSG00000260552	COSMOC	5.29964	2.04843	0.658197	3.11218	0.00185712	0.146319	1.4935	2.54468	3.77447	0	1.95174	1.50814	8.59698	6.53826	15.5348	8.54795	10.0992	3.00598
185	ENSG00000107485	GATA3	7.71076	-1.92839	0.620203	-3.10929	0.00187536	0.146908	16.4285	5.08935	27.6795	11.4278	7.80695	4.52441	0.95522	2.37755	4.02755	2.13699	7.06941	3.00598
186	ENSG00000160213	CSTB	488.464	1.03941	0.334453	3.1078	0.00188486	0.146908	198.635	287.548	348.51	356.547	395.227	331.79	1420.41	402.995	446.483	741.535	438.303	493.583
187	ENSG00000118971	CCND2	99.8659	-0.849281	0.274505	-3.09386	0.00197573	0.153166	123.213	96.6977	194.385	143.99	116.128	91.9962	45.8506	59.4387	53.5089	106.849	76.7536	89.5783
188	ENSG00000171631	P2RY6	23.432	-1.8687	0.604327	-3.09219	0.00198682	0.153207	120.226	15.2681	26.4213	25.1411	11.7104	21.1139	15.2835	16.0485	6.90437	12.8219	3.02975	7.21436
189	ENSG00000099994	SUSD2	118.458	2.27926	0.737892	3.08889	0.00200909	0.154105	5.22723	59.7999	6.91987	27.4267	51.7211	91.9962	44.8953	108.773	128.882	594.083	277.727	24.0479
190	ENSG00000163131	CTSS	349.37	-1.29944	0.422322	-3.07688	0.00209179	0.157941	601.132	171.766	849.256	516.536	674.325	168.911	245.492	152.758	237.625	138.904	111.091	324.646
191	ENSG00000161267	BDH1	13.1154	2.64514	0.85925	3.07842	0.00208098	0.157941	5.97398	2.54468	3.14539	6.85667	1.95174	1.50814	50.6267	0.594387	44.303	25.6439	1.00992	13.2263
192	ENSG00000136490	LIMD2	59.4457	-1.55493	0.505092	-3.0785	0.00208043	0.157941	171.752	36.8978	149.721	75.4233	63.4315	33.179	9.5522	21.3979	40.2755	51.2877	14.1388	46.2922
193	ENSG00000137101	CD72	20.003	-1.74145	0.566602	-3.07349	0.00211572	0.15892	76.1683	10.1787	42.7774	34.2833	7.80695	12.0651	4.7761	6.53826	10.3566	14.9589	11.1091	9.01795
194	ENSG00000168421	RHOH	18.0405	-1.54014	0.501754	-3.0695	0.00214416	0.159404	49.2854	13.9957	44.0355	22.8556	16.5898	13.5732	1.91044	14.8597	12.0826	12.8219	6.05949	8.41676
195	ENSG00000204267	TAP2	52.1065	-1.03164	0.336011	-3.07025	0.00213881	0.159404	116.493	41.9872	96.2491	52.5678	75.1419	34.6871	27.7014	23.1811	35.0972	38.4658	43.4264	40.2802
196	ENSG00000158869	FCER1G	258.335	-1.15189	0.376096	-3.06276	0.00219307	0.162209	575.743	137.413	447.275	386.259	391.323	196.058	97.4324	146.219	143.266	288.493	96.9519	193.585
197	ENSG00000185168	LINC00482	8.42337	3.41062	1.11618	3.05561	0.002246	0.16528	0	2.54468	0.629079	2.28556	0.975869	3.01627	63.9997	9.5102	1.72609	4.27398	12.119	0
198	ENSG00000130270	ATP8B3	37.9456	2.81388	0.921883	3.05232	0.00227082	0.166263	15.6817	2.54468	9.43618	6.85667	3.90348	18.0976	14.3283	268.663	4.60291	102.575	5.04958	3.60718
199	ENSG00000196781	TLE1	39.516	1.04434	0.342632	3.04801	0.00230365	0.16782	15.6817	33.0808	20.1305	18.2844	30.2519	36.1952	54.4475	45.7678	35.6726	79.0686	76.7536	28.8575
200	ENSG00000116729	WLS	85.7362	-1.30007	0.427228	-3.04303	0.00234209	0.169767	68.7008	143.774	110.089	178.273	112.225	117.635	35.3431	26.7474	43.7277	87.6165	12.119	92.5843
201	ENSG00000197646	PDCD1LG2	7.06906	-1.92045	0.631418	-3.04149	0.00235411	0.169789	22.4024	3.81702	14.4688	9.14222	14.638	1.50814	2.86566	1.18877	2.87682	4.27398	4.03966	3.60718
202	ENSG00000116824	CD2	99.415	-1.65598	0.547538	-3.02441	0.00249115	0.174465	232.239	59.7999	267.359	191.987	108.321	42.2278	15.2835	27.9362	26.4667	123.945	28.2776	69.1377
203	ENSG00000163154	TNFAIP8L2	12.0338	-1.70966	0.564557	-3.02832	0.00245915	0.174465	25.3894	1.27234	27.0504	18.2844	27.3243	10.5569	1.91044	6.53826	7.47973	8.54795	4.03966	6.01197
204	ENSG00000069424	KCNAB2	48.4091	-0.982216	0.324604	-3.02589	0.00247899	0.174465	79.1553	47.0765	98.7654	61.71	57.5763	36.1952	25.7909	20.8036	31.0697	59.8357	26.2578	36.673
205	ENSG00000254126	CD8B2	3.0091	-5.1768	1.71121	-3.02523	0.00248445	0.174465	1.4935	0	1.88724	29.7122	0	3.01627	0	0	0	0	0	0
206	ENSG00000251493	FOXD1	11.0197	3.57524	1.18119	3.02681	0.00247149	0.174465	1.4935	0	2.51632	4.57111	1.95174	0	1.91044	80.2423	1.15073	34.1918	0	4.20838
207	ENSG00000105851	PIK3CG	29.702	-1.28266	0.423554	-3.02833	0.00245907	0.174465	53.0191	35.6255	74.2313	31.9978	40.9865	15.0814	5.73132	21.3979	24.1653	25.6439	11.1091	17.4347
208	ENSG00000100055	CYTH4	38.8526	-1.32568	0.438557	-3.02282	0.00250429	0.174542	74.6748	27.9914	78.0058	68.5667	50.7452	30.1627	7.64176	26.7474	23.0146	49.1507	9.08924	20.4407
209	ENSG00000113296	THBS4	5.78036	-3.07676	1.02117	-3.01298	0.002587	0.179156	11.948	1.27234	1.88724	2.28556	40.0106	4.52441	0	2.97194	1.72609	2.13699	0	0.601197
210	ENSG00000250222	TRIM7-AS2	11.0936	1.51115	0.501707	3.01201	0.0025952	0.179156	3.73374	7.63403	5.66171	9.14222	6.83108	3.01627	25.7909	7.72703	18.4117	6.41097	11.1091	27.6551
211	ENSG00000106948	AKNA	87.2183	-1.13543	0.378164	-3.00247	0.00267798	0.183993	150.843	59.7999	188.095	159.989	89.78	66.3579	31.5223	58.8443	39.7001	106.849	57.5652	37.2742
212	ENSG00000133710	SPINK5	5.94527	-3.25223	1.0843	-2.99939	0.00270525	0.184122	31.3634	26.7191	2.51632	2.28556	1.95174	0	1.91044	1.78316	0	0	1.00992	1.80359
213	ENSG00000180861	LINC01559	6.87376	4.50821	1.50295	2.99958	0.00270355	0.184122	0.746748	2.54468	0	0	0	0	0.95522	20.2092	49.4813	8.54795	0	0
214	ENSG00000101849	TBL1X	112.654	0.948209	0.316578	2.99519	0.00274278	0.184623	52.2723	81.4297	44.0355	75.4233	106.37	104.061	126.089	219.923	184.117	143.178	143.408	71.5424
215	ENSG00000188158	NHS	39.4019	1.1946	0.398639	2.99671	0.00272909	0.184623	35.0971	16.5404	15.727	38.8545	9.75869	30.1627	85.9698	74.8928	51.7828	42.7398	45.4462	25.8515
216	ENSG00000100099	HPS4	74.7533	0.662959	0.221408	2.99429	0.00275082	0.184623	57.4996	58.5276	47.81	57.1389	49.7693	78.423	68.7758	118.283	101.839	104.712	70.6941	83.5664
217	ENSG00000287024		10.8613	1.61319	0.539376	2.99085	0.00278203	0.185858	4.48049	7.63403	9.43618	0	6.83108	1.50814	36.2984	11.8877	14.3841	14.9589	9.08924	13.8275
218	ENSG00000135480	KRT7	16.5957	2.51577	0.841552	2.98943	0.00279494	0.185863	0	2.54468	11.9525	2.28556	7.80695	4.52441	27.7014	26.153	83.4278	0	11.1091	21.6431
219	ENSG00000162390	ACOT11	16.6307	1.90826	0.639085	2.98593	0.00282718	0.187149	0.746748	10.1787	10.0653	11.4278	8.78282	1.50814	5.73132	40.4183	24.1653	14.9589	56.5553	15.0299
220	ENSG00000223865	HLA-DPB1	2127.64	-1.30936	0.438836	-2.9837	0.00284784	0.18766	4330.39	1824.53	5517.65	2342.69	2480.66	1692.13	238.805	964.096	1288.82	2158.36	1248.26	1445.28
221	ENSG00000224167	LINC01357	4.06609	-2.46956	0.828964	-2.97909	0.00289107	0.188104	19.4154	1.27234	7.54895	2.28556	5.85521	4.52441	0	1.18877	1.15073	2.13699	1.00992	2.40479
222	ENSG00000130508	PXDN	74.8698	1.54957	0.52062	2.97639	0.00291662	0.188104	26.8829	29.2638	34.5993	57.1389	45.8658	34.6871	149.97	133.737	27.0421	279.945	44.4363	34.8694
223	ENSG00000163519	TRAT1	9.89448	-2.09222	0.703113	-2.97565	0.00292367	0.188104	28.3764	1.27234	30.8249	13.7133	14.638	6.03254	0.95522	1.18877	5.75364	8.54795	2.01983	5.41077
224	ENSG00000103365	GGA2	101.342	-0.646973	0.217489	-2.97473	0.00293243	0.188104	130.681	131.051	132.107	130.277	108.321	113.11	47.761	82.6198	78.8249	59.8357	90.8924	110.62
225	ENSG00000105366	SIGLEC8	18.1473	-1.58775	0.533105	-2.97831	0.00289844	0.188104	44.0581	8.90637	48.4391	18.2844	30.2519	12.0651	8.59698	16.0485	2.30146	10.6849	12.119	6.01197
226	ENSG00000096996	IL12RB1	19.4834	-1.53604	0.515657	-2.9788	0.00289375	0.188104	46.2984	7.63403	40.261	41.14	22.445	13.5732	2.86566	10.1046	7.47973	23.5069	7.06941	11.4227
227	ENSG00000196735	HLA-DQA1	669.861	-1.21898	0.411035	-2.96563	0.00302064	0.188751	1502.46	540.744	1499.72	1103.92	566.004	410.213	181.492	438.063	537.39	429.535	196.933	631.858
228	ENSG00000241764	CBLL1-AS1	4.65374	2.30785	0.777835	2.96701	0.0030071	0.188751	1.4935	2.54468	1.25816	2.28556	0.975869	1.50814	9.5522	5.94387	18.987	4.27398	1.00992	6.01197
229	ENSG00000069667	RORA	48.3736	0.965154	0.325397	2.96608	0.00301618	0.188751	30.6167	43.2595	27.6795	20.57	49.7693	24.1302	111.761	65.977	70.1944	40.6028	42.4164	53.5065
230	ENSG00000109062	SLC9A3R1	792.967	0.979676	0.330113	2.9677	0.00300037	0.188751	280.777	736.684	483.762	445.683	636.267	618.335	749.848	1294.58	1083.41	1228.77	1558.3	399.195
231	ENSG00000153822	KCNJ16	247.266	1.10645	0.372835	2.96766	0.00300078	0.188751	254.641	209.936	101.911	77.7089	143.453	152.322	572.177	476.104	362.479	179.507	265.608	171.341
232	ENSG00000101255	TRIB3	159.108	1.95286	0.657401	2.97057	0.00297245	0.188751	58.2463	64.8893	20.1305	43.4256	47.8176	158.354	550.207	637.183	56.961	134.63	98.9717	38.4766
233	ENSG00000203747	FCGR3A	464.405	-1.62552	0.549209	-2.95975	0.00307884	0.188849	1757.1	283.731	879.452	418.257	506.476	358.936	67.8206	241.321	95.5104	626.138	184.815	153.305
234	ENSG00000159023	EPB41	126.105	1.23036	0.415889	2.95838	0.00309262	0.188849	97.0772	33.0808	106.943	84.5656	60.5039	67.8661	257.909	196.148	147.293	316.274	90.8924	54.7089
235	ENSG00000162676	GFI1	6.24894	-1.60919	0.543868	-2.95879	0.00308849	0.188849	8.21423	3.81702	13.8397	15.9989	7.80695	7.54068	0.95522	4.7551	2.87682	2.13699	4.03966	3.00598
236	ENSG00000171174	RBKS	54.1674	0.869189	0.293883	2.95761	0.00310037	0.188849	46.2984	57.2552	27.6795	29.7122	32.2037	36.1952	64.955	61.2219	52.9335	59.8357	122.2	59.5185
237	ENSG00000135094	SDS	24.1304	-1.46276	0.494221	-2.95974	0.00307902	0.188849	40.3244	12.7234	67.9405	29.7122	53.6728	7.54068	18.1492	7.13265	13.2334	8.54795	16.1586	14.4287
238	ENSG00000172349	IL16	45.5156	-1.18492	0.400299	-2.96008	0.0030756	0.188849	88.863	35.6255	103.798	63.9956	53.6728	30.1627	10.5074	27.3418	26.4667	51.2877	20.1983	34.2682
239	ENSG00000256235	SMIM3	149.906	1.98725	0.673188	2.95199	0.0031573	0.191512	167.272	41.9872	45.2937	20.57	15.6139	69.3742	384.954	46.3622	181.24	621.864	170.676	33.667
240	ENSG00000153956	CACNA2D1	31.7905	-1.88252	0.638077	-2.9503	0.00317466	0.191763	4.48049	61.0722	25.1632	59.4245	81.973	66.3579	5.73132	3.56632	4.60291	29.9178	15.1487	24.0479
241	ENSG00000127152	BCL11B	20.2656	-1.29489	0.43945	-2.94661	0.00321277	0.192461	50.0321	12.7234	49.0681	25.1411	18.5415	15.0814	8.59698	13.6709	13.8087	19.2329	7.06941	10.2203
242	ENSG00000161653	NAGS	8.48112	2.49866	0.847938	2.94674	0.00321139	0.192461	2.98699	2.54468	5.66171	0	0	3.01627	10.5074	25.5586	22.4392	25.6439	1.00992	2.40479
243	ENSG00000247774	PCED1B-AS1	52.8629	-1.22742	0.417346	-2.94102	0.00327136	0.195164	97.0772	48.3489	124.558	82.28	52.6969	34.6871	15.2835	29.7194	22.4392	74.7946	21.2082	31.2622
244	ENSG00000179094	PER1	103.15	1.13404	0.38599	2.938	0.00330335	0.196265	115.746	54.7105	41.5192	57.1389	48.7935	67.8661	130.865	191.987	128.306	203.014	160.577	37.2742
245	ENSG00000128710	HOXD10	16.2815	1.86767	0.636581	2.93391	0.00334721	0.198059	1.4935	7.63403	16.356	0	6.83108	7.54068	27.7014	38.6352	7.47973	51.2877	20.1983	10.2203
246	ENSG00000128918	ALDH1A2	4.87134	2.69512	0.919647	2.93061	0.00338301	0.199364	0	3.81702	1.25816	2.28556	0.975869	0	27.7014	5.94387	4.02755	6.41097	3.02975	3.00598
247	ENSG00000163687	DNASE1L3	9.79143	-1.76455	0.603149	-2.92556	0.00343835	0.201804	12.6947	38.1702	15.0979	6.85667	11.7104	6.03254	0.95522	1.78316	4.02755	4.27398	8.07932	7.81556
248	ENSG00000119703	ZC2HC1C	13.7414	1.45427	0.497433	2.92355	0.00346064	0.202294	2.98699	12.7234	6.91987	9.14222	8.78282	4.52441	18.1492	18.426	13.8087	8.54795	46.4561	14.4287
249	ENSG00000169439	SDC2	308.252	0.761352	0.260764	2.91969	0.00350375	0.203992	215.81	215.025	286.86	189.701	260.557	202.09	382.088	547.431	396.426	459.453	166.636	376.95
250	ENSG00000108379	WNT3	3.9423	2.35884	0.808601	2.91718	0.00353211	0.20482	0.746748	2.54468	2.51632	0	0.975869	0	13.3731	8.32142	3.45218	8.54795	2.01983	4.80958
251	ENSG00000164932	CTHRC1	37.6447	1.76686	0.607059	2.91052	0.0036083	0.208404	34.3504	3.81702	9.43618	13.7133	35.1313	4.52441	22.9253	110.556	60.4132	104.712	32.3173	19.8395
252	ENSG00000142599	RERE	207.088	0.691623	0.237752	2.90901	0.00362575	0.208581	126.947	170.493	137.768	166.846	223.474	122.159	168.119	237.16	267.544	391.069	247.429	226.05
253	ENSG00000088827	SIGLEC1	24.9533	-1.55171	0.533835	-2.90672	0.00365237	0.209282	50.0321	13.9957	69.8278	31.9978	32.2037	22.622	11.4626	2.97194	4.02755	23.5069	15.1487	21.6431
254	ENSG00000154917	RAB6B	12.2701	1.6122	0.556171	2.89875	0.00374658	0.213359	13.4415	6.36169	3.77447	0	6.83108	3.01627	21.0148	6.53826	11.5073	36.3288	19.1884	19.2383
255	ENSG00000111679	PTPN6	90.8913	-0.865411	0.298601	-2.89821	0.00375295	0.213359	144.869	71.2509	201.934	105.136	97.5869	78.423	60.1789	58.8443	70.7698	98.3015	50.4958	52.9053
256	ENSG00000184613	NELL2	4.45209	-2.81496	0.97175	-2.89679	0.00377001	0.213492	13.4415	1.27234	19.5014	6.85667	4.87935	1.50814	0	1.78316	0.575364	0	0	3.60718
257	ENSG00000177369	FLJ40194	4.07982	-1.94357	0.671383	-2.89487	0.00379311	0.213964	10.4545	2.54468	6.29079	9.14222	4.87935	6.03254	1.91044	0.594387	2.87682	0	3.02975	1.20239
258	ENSG00000101489	CELF4	2.77635	3.33284	1.15238	2.89215	0.00382616	0.214992	0.746748	0	0.629079	0	0.975869	0	0.95522	5.94387	1.72609	0	12.119	10.2203
259	ENSG00000116198	CEP104	52.3996	0.690792	0.238953	2.89091	0.00384126	0.215007	28.3764	43.2595	28.9376	54.8533	52.6969	34.6871	71.6415	61.2219	63.2901	76.9316	60.5949	52.3041
260	ENSG00000029153	ARNTL2	8.46956	-1.50067	0.520027	-2.88576	0.0039047	0.217717	20.1622	5.08935	14.4688	11.4278	10.7346	13.5732	4.7761	4.16071	5.75364	4.27398	0	7.21436
261	ENSG00000159189	C1QC	946.251	-1.25841	0.437086	-2.87908	0.00398836	0.218226	2337.32	469.493	2104.27	870.797	1496.98	723.905	372.536	545.053	273.873	1160.38	384.778	615.626
262	ENSG00000164171	ITGA2	37.482	-0.864951	0.300112	-2.8821	0.00395035	0.218226	50.0321	52.1659	49.0681	50.2822	25.3726	66.3579	38.2088	23.7755	34.5218	14.9589	19.1884	25.8515
263	ENSG00000278982		3.06781	-2.44615	0.848396	-2.88327	0.00393575	0.218226	6.72073	1.27234	8.17802	6.85667	5.85521	1.50814	0.95522	0.594387	1.72609	2.13699	1.00992	0
264	ENSG00000156127	BATF	15.781	-1.7903	0.621843	-2.87902	0.00398909	0.218226	50.0321	5.08935	45.9228	13.7133	13.6622	15.0814	2.86566	3.56632	4.60291	21.3699	5.04958	8.41676
265	ENSG00000188283	ZNF383	25.684	-0.723817	0.25125	-2.88086	0.00396589	0.218226	27.6297	34.3531	33.9703	31.9978	30.2519	31.6708	21.0148	15.4541	16.6856	23.5069	24.238	17.4347
266	ENSG00000197992	CLEC9A	8.7567	-2.20694	0.767213	-2.87657	0.00402025	0.219104	20.1622	0	6.91987	31.9978	20.4932	7.54068	0	2.37755	4.60291	2.13699	4.03966	4.80958
267	ENSG00000135549	PKIB	27.9293	-1.29402	0.450173	-2.87449	0.00404679	0.219713	53.7658	16.5404	77.3767	27.4267	37.083	24.1302	6.68654	11.2934	13.8087	17.0959	31.3074	18.6371
268	ENSG00000283633		9.98146	4.01049	1.39577	2.87333	0.00406175	0.219713	3.73374	0	0	2.28556	0.975869	0	96.4772	0.594387	0	10.6849	2.01983	3.00598
269	ENSG00000254087	LYN	64.7402	-0.933682	0.325167	-2.87139	0.00408672	0.220242	154.577	53.4382	98.7654	84.5656	75.1419	42.2278	33.4327	40.4183	42.5769	47.0137	40.3966	64.3281
270	ENSG00000116717	GADD45A	106.191	1.41061	0.49215	2.86622	0.00415411	0.220594	80.6488	109.421	33.3412	13.7133	54.6487	55.801	232.118	233.594	87.4553	38.4658	232.281	102.805
271	ENSG00000177494	ZBED2	4.312	-3.29825	1.15046	-2.86689	0.00414533	0.220594	20.9089	0	13.8397	6.85667	2.92761	3.01627	0	1.18877	0	0	0	3.00598
272	ENSG00000043462	LCP2	91.8203	-1.05845	0.368872	-2.86942	0.00411227	0.220594	221.037	53.4382	165.448	125.706	121.984	54.2929	45.8506	57.0612	64.4408	85.4795	37.3669	69.7388
273	ENSG00000118496	FBXO30	19.7781	-1.02718	0.358113	-2.8683	0.00412679	0.220594	16.4285	15.2681	32.7121	47.9967	27.3243	21.1139	14.3283	10.699	15.5348	12.8219	8.07932	15.0299
274	ENSG00000019485	PRDM11	11.7548	1.18291	0.413294	2.86214	0.00420786	0.221959	5.97398	8.90637	4.40355	6.85667	8.78282	9.04881	11.4626	20.2092	20.7131	17.0959	19.1884	8.41676
275	ENSG00000215440	NPEPL1	49.4028	1.43385	0.501207	2.8608	0.00422575	0.221959	30.6167	31.8085	18.2433	34.2833	18.5415	25.6383	103.164	46.9566	25.8914	190.192	46.4561	21.0419
276	ENSG00000128340	RAC2	96.8344	-1.19382	0.41727	-2.86102	0.00422283	0.221959	234.479	57.2552	198.16	166.846	108.321	42.2278	73.5519	47.551	57.5364	72.6576	28.2776	75.1496
277	ENSG00000148950	IMMP1L	15.2168	1.05811	0.370161	2.85852	0.00425623	0.222753	8.96097	6.36169	13.2107	9.14222	12.6863	7.54068	27.7014	11.2934	20.7131	21.3699	17.1686	26.4527
278	ENSG00000115415	STAT1	367.223	-1.06277	0.372673	-2.85175	0.00434795	0.226728	1014.83	279.914	664.936	415.971	407.913	196.058	213.969	196.742	306.669	209.425	160.577	339.676
279	ENSG00000160223	ICOSLG	17.3228	1.91954	0.673379	2.85062	0.00436346	0.226728	14.935	1.27234	1.88724	6.85667	3.90348	15.0814	51.5819	38.0408	23.5899	8.54795	37.3669	4.80958
280	ENSG00000147394	ZNF185	34.5736	0.825017	0.289891	2.84595	0.00442785	0.229252	33.6037	25.4468	25.1632	27.4267	24.3967	13.5732	52.5371	54.6836	54.6596	38.4658	25.2479	39.679
281	ENSG00000185862	EVI2B	88.6848	-1.09203	0.38433	-2.84138	0.00449188	0.231739	163.538	81.4297	193.756	118.849	115.153	48.2603	24.8357	57.0612	55.8103	100.438	35.347	69.7388
282	ENSG00000285373	LINC02478	3.90759	2.54464	0.896585	2.83814	0.00453773	0.23213	0.746748	2.54468	1.88724	0	0	1.50814	14.3283	7.72703	1.15073	2.13699	4.03966	10.8215
283	ENSG00000073792	IGF2BP2	12.0715	3.26142	1.14942	2.83745	0.00454748	0.23213	4.48049	1.27234	2.51632	0	2.92761	1.50814	0.95522	17.8316	9.78119	102.575	1.00992	0
284	ENSG00000112282	MED23	53.5328	-0.69695	0.245435	-2.83966	0.00451619	0.23213	60.4866	57.2552	79.2639	66.2811	65.3832	63.3417	29.6118	30.9081	48.3306	70.5206	34.3371	36.673
285	ENSG00000083857	FAT1	152.03	1.25074	0.441477	2.83307	0.00461032	0.233692	76.915	83.9743	78.0058	111.992	83.9247	107.078	334.327	381.002	283.655	113.26	37.3669	132.865
286	ENSG00000078804	TP53INP2	153.407	0.662651	0.233873	2.83338	0.00460591	0.233692	116.493	105.604	93.1037	139.419	102.466	156.846	204.417	142.653	165.705	209.425	273.687	131.061
287	ENSG00000108798	ABI3	79.4568	-0.906821	0.320249	-2.83161	0.00463145	0.233944	138.895	83.9743	127.074	95.9933	108.321	60.3254	35.3431	45.1734	45.4538	117.534	51.5057	43.8874
288	ENSG00000162894	FCMR	16.4061	-1.51863	0.536891	-2.82857	0.00467564	0.234669	25.3894	10.1787	67.9405	11.4278	17.5656	12.0651	4.7761	5.34948	9.78119	10.6849	9.08924	12.6251
289	ENSG00000162105	SHANK2	34.755	0.897014	0.317146	2.8284	0.00467816	0.234669	17.9219	20.3574	20.1305	31.9978	27.3243	31.6708	66.8654	58.2499	52.9335	25.6439	30.2975	33.667
290	ENSG00000181631	P2RY13	18.9204	-1.41311	0.500397	-2.82399	0.00474303	0.23495	41.8179	15.2681	34.5993	15.9989	37.083	18.0976	5.73132	16.6428	9.20583	21.3699	1.00992	10.2203
291	ENSG00000164855	TMEM184A	18.3211	1.40439	0.497624	2.82219	0.00476967	0.23495	10.4545	13.9957	4.40355	4.57111	7.80695	19.6058	37.2536	43.9847	18.4117	19.2329	32.3173	7.81556
[truncated: 26,166 more rows]

## Sheet: Table S5
Table S5: Subsampled PCR-cDNA-seq (5%) recurrent vs non recurrent ccRCC differential gene expression analysis
[truncated: 34,889 more rows]

[truncated: 15 more sheets: Table S6, Table S7, Table S8, Table S9, Table S10, Table S11, Table S12, Table S13, Table S14, Table S15, Table S16, Table S17, Table S18, Table S19, Table S20]
